# Supplementary material for: Thermochemical production of ammonia via a two-step metal nitride cycle – materials screening and the strontium-based system
Source: Royal Society of Chemistry journal article supplement (doi:10.1039/d4mh00301b), 2024-01-01
Supplement: d4mh00301b1.pdf [file d4mh00301b1.pdf]

# Thermochemical production of ammonia via a two-step metal nitride cycle – Materials screening and the Strontium-based system

Daniel Notter,<sup>a</sup> Tiago Elias Abi-Ramia Silva,<sup>a</sup> María Elena Gálvez,<sup>b</sup> Brendan Bulfin,<sup>c</sup> and Aldo Steinfeld<sup>a,\*</sup>

## Supplementary Information

### 1. Theoretical Screening

#### 1.1 Formulation

Data was obtained from the Materials Project database (MP, database version: v2023.11.1)<sup>1</sup>. The Python library pymatgen (Python Material Genomics)<sup>2</sup> was used for the calculations. The essential data exported were the energy above convex hull per atom  $E_{hull}$ , the formation energy per atom  $E_{form}$ , and the elastic tensor  $C_{ij}$ .

The calculation of the heat capacity is based on the Debye model.<sup>3,4</sup> Longitudinal and transverse sound velocities  $v_l$  and  $v_t$  are calculated with the pymatgen functions `long_v` and `trans_v` which use the Voigt-Reuss-Hill average bulk modulus derived from the elastic tensor  $C_{ij}$ . The volume of the primitive cell  $v_0$  is

$$v_0 = \frac{v}{n_{sites}} \quad (S1)$$

where  $v$  is the volume of the conventional unit cell and  $n_{sites}$  the number of sites in the unit cell. The average sound velocity  $v_m$  is defined as

$$v_m = \left( \frac{3}{\frac{1}{v_l^3} + \frac{2}{v_t^3}} \right)^{1/3} \quad (S2)$$

The Debye temperature  $\Theta_D$  is given as

$$\Theta_D = \frac{\hbar}{k_B} v_m \left( \frac{6\pi^2}{v_0} \right)^{1/3} \quad (S3)$$

where  $\hbar$  is the reduced Planck constant and  $k_B$  is the Boltzmann constant. The specific heat capacity at constant volume  $c_v$  can then be approximated as

$$c_v(T) = 9R \cdot n \cdot \left( \frac{T}{\Theta_D} \right)^3 \int_0^{\Theta_D/T} \frac{x^4 \cdot e^x}{(e^x - 1)^2} dx \quad (S4)$$

where  $n$  is the number of atoms and  $T$  is the temperature in Kelvin. With the assumption that the heat capacity ratio of a solid is nearly 1, the specific heat capacity at constant pressure  $c_p$  is approximated as:

$$c_p(T) = c_v(T) \quad (S5)$$

The entropy is directly calculated from the approximation of the specific heat capacity as:

$$s(T) = \int_{0K}^T \frac{c_p}{T} dT \quad (S6)$$

The standard enthalpy of formation  $h_f^o$  is approximated with the help of the formation energy per atom  $E_{form}$ :

$$h_f^o = E_{form} \cdot e \cdot N_A \cdot n \quad (S7)$$

The enthalpy is then calculated as:

$$h(T) = h_f^o + \int_{298K}^T c_p dT \quad (S8)$$

<sup>a,\*</sup> Department of Mechanical Engineering, ETH Zürich, 8092 Zürich, Switzerland

<sup>b</sup> Instituto de Nanociencia y Materiales de Aragón (INMA), CSIC-Universidad de Zaragoza, C/ Pedro Cerbuna 12, 50009 Zaragoza, Spain.

<sup>c</sup> School of Chemistry & Environmental Research Institute, University College Cork, T12 YN60 Cork, Ireland.

\* Corresponding author; Email: aldo.steinfeld@ethz.ch

## 1.2 Validation of Thermodynamic Data Approximation

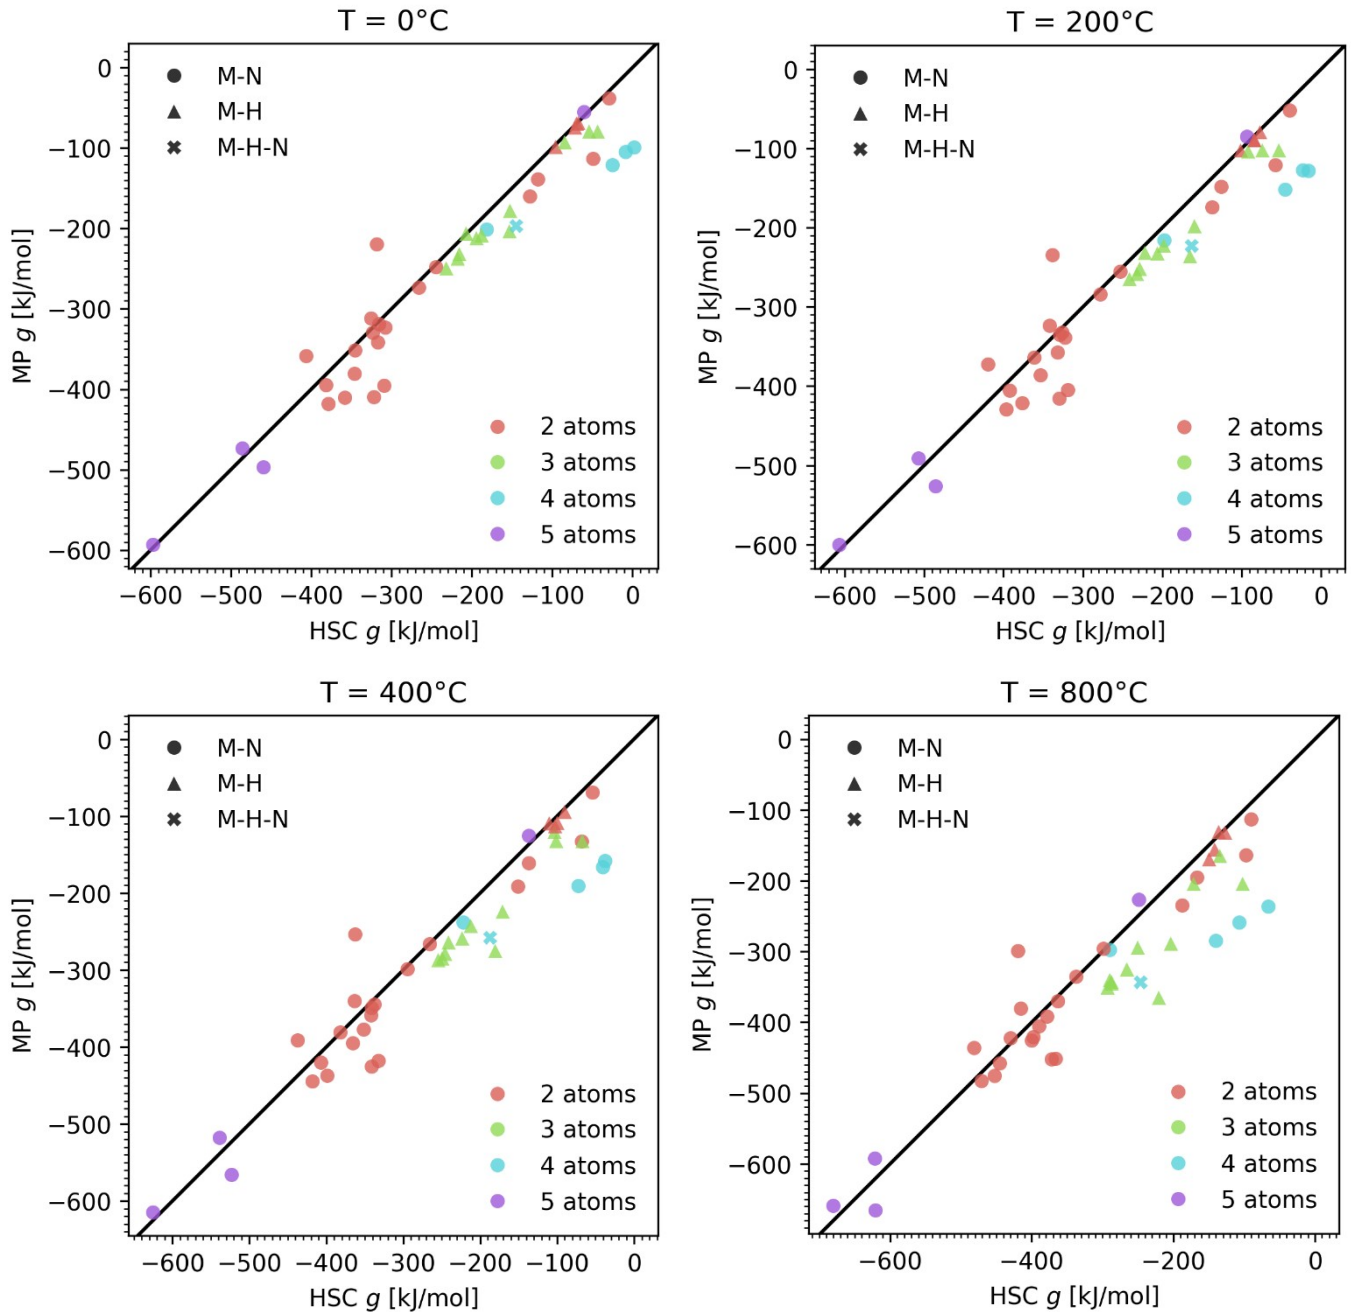

Figure S1: Comparison of Gibbs free energies calculated from MP database data, and Gibbs free energies taken from HSC database for 4 temperatures 0, 200, 400, 800 °C. The shape of the markers indicate the 3 type of materials: metal nitride (M-N), metal hydride (M-H), and metal imide (M-H-N). The color of the markers indicate the number of atoms (some MP data is calculated in eV/atom). The comparison included all available materials that were found in a stable form in both databases: 28 metal nitrides, 15 metal hydrides, 1 metal imide.

## 1.3 Source of thermodynamic data

Thermodynamic data was obtained from the Materials Project database (MP, database version: v2023.11.1) and from the HSC Chemistry 5 database (HSC). Some materials from the MP database were only used for the calculate of the stoichiometric weight changes since not all required properties for the calculations in Section 1.1 were available (marked with \*). When data was available from both databases, HSC data was given preference. The MP data was still used for validation purposes (marked with \*\*).

Table S1: The Al-based system

| Formula             | Source | mpid       | E_hull [eV/atom] | E_form [eV/atom] | n  |
|---------------------|--------|------------|------------------|------------------|----|
| Al                  | HSC    | -          | -                | -                | -  |
| Al <sub>3</sub> H*  | MP     | mp-1183138 | 0.413076         | 0.388532         | 4  |
| AlH <sub>12</sub> * | MP     | mp-1214891 | 0.12337          | 0.100714         | 13 |
| AlH <sub>3</sub>    | HSC    | -          | -                | -                | -  |
| AlH <sub>6</sub> *  | MP     | mp-1214861 | 1.008702         | 0.966626         | 7  |

|       |     |        |   |          |   |
|-------|-----|--------|---|----------|---|
| AlN   | HSC | -      | - | -        | - |
| AlN** | MP  | mp-661 | 0 | -1.67967 | 2 |

Table S2: The Ca-based system

| Formula   | Source | mpid       | E_hull [eV/atom] | E_form [eV/atom] | n  |
|-----------|--------|------------|------------------|------------------|----|
| Ca        | HSC    | -          | -                | -                | -  |
| CaH2      | HSC    | -          | -                | -                | -  |
| CaH2**    | MP     | mp-23713   | 0                | -0.66688         | 3  |
| Ca(H2N)2* | MP     | mp-644307  | 0                | -0.6897          | 7  |
| Ca16HN8*  | MP     | mp-675153  | 0.029588         | -0.8758          | 25 |
| Ca2HN*    | MP     | mp-24119   | 0                | -0.94564         | 4  |
| Ca8H3N4*  | MP     | mp-530696  | 0.05222          | -0.88383         | 15 |
| CaHN*     | MP     | mp-34932   | 0                | -0.89293         | 3  |
| Ca11N8*   | MP     | mp-680640  | 0.201076         | -0.73335         | 19 |
| Ca2N      | MP     | mp-2686    | 0                | -0.89772         | 3  |
| Ca3N2     | HSC    | -          | -                | -                | -  |
| Ca3N2**   | MP     | mp-844     | 0                | -0.95972         | 5  |
| CaN*      | MP     | mp-1058549 | 0.398168         | -0.44138         | 2  |
| CaN2      | MP     | mp-1009657 | 0                | -0.63927         | 3  |
| CaN6      | MP     | mp-676     | 0.040613         | -0.23336         | 7  |

Table S3: The Co-based system

| Formula | Source | mpid       | E_hull [eV/atom] | E_form [eV/atom] | n  |
|---------|--------|------------|------------------|------------------|----|
| Co      | HSC    | -          | -                | -                | -  |
| Co3H    | MP     | mp-1025425 | 0.004233         | -0.02174         | 4  |
| Co4H*   | MP     | mp-1226072 | 0.012287         | -0.00849         | 5  |
| CoH*    | MP     | mp-1206874 | 0                | -0.05194         | 2  |
| CoH3*   | MP     | mp-1183678 | 0.153299         | 0.127328         | 4  |
| Co2N    | MP     | mp-22631   | 0.177865         | 0.177865         | 3  |
| Co3N    | HSC    | -          | -                | -                | -  |
| Co3N**  | MP     | mp-1205986 | 0.159141         | 0.159141         | 4  |
| Co4N*   | MP     | mp-1206425 | 0.069595         | 0.069595         | 5  |
| CoN     | MP     | mp-448     | 0.102861         | 0.102861         | 2  |
| CoN12*  | MP     | mp-1194075 | 1.244613         | 1.244613         | 13 |
| CoN3*   | MP     | mp-22762   | 0.383968         | 0.383968         | 4  |

Table S4: The Cr-based system

| Formula | Source | mpid       | E_hull [eV/atom] | E_form [eV/atom] | n |
|---------|--------|------------|------------------|------------------|---|
| Cr      | HSC    | -          | -                | -                | - |
| Cr3H*   | MP     | mp-1183723 | 0.757946         | 0.757946         | 4 |
| CrH     | MP     | mp-24669   | 0.1659           | 0.1659           | 2 |
| CrH2*   | MP     | mp-24208   | 0.00228          | 0.00228          | 3 |
| CrH3*   | MP     | mp-1183679 | 0.123355         | 0.123355         | 4 |
| Cr2N    | HSC    | -          | -                | -                | - |
| Cr2N**  | MP     | mp-8780    | 0.244667         | -0.25479         | 3 |
| Cr3N2   | MP     | mp-1014303 | 0.087926         | -0.51142         | 5 |
| Cr3N4   | MP     | mp-1014460 | 0.277954         | -0.36421         | 7 |

|       |     |            |          |          |   |
|-------|-----|------------|----------|----------|---|
| CrN   | HSC | -          | -        | -        | - |
| CrN** | MP  | mp-2132    | 0        | -0.74919 | 2 |
| CrN2  | MP  | mp-1014993 | 0.296759 | -0.2027  | 3 |

Table S5: The Cu-based system

| Formula | Source | mpid       | E_hull [eV/atom] | E_form [eV/atom] | n  |
|---------|--------|------------|------------------|------------------|----|
| Cu      | HSC    | -          | -                | -                | -  |
| CuH     | MP     | mp-24093   | 0.115168         | 0.115168         | 2  |
| Cu10N3* | MP     | mp-1225831 | 0.197459         | 0.197459         | 13 |
| Cu2N*   | MP     | mp-1147700 | 0.351218         | 0.351218         | 3  |
| Cu3N    | MP     | mp-1933    | 0.19208          | 0.19208          | 4  |
| CuN     | MP     | mp-13117   | 0.795979         | 0.795979         | 2  |
| CuN3    | MP     | mp-27954   | 0.293795         | 0.293795         | 4  |
| CuN6    | MP     | mp-608366  | 0.339206         | 0.339206         | 7  |
| CuN8*   | MP     | mp-1198545 | 1.244581         | 1.244581         | 9  |

Table S6: The Fe-based system

| Formula  | Source | mpid       | E_hull [eV/atom] | E_form [eV/atom] | n  |
|----------|--------|------------|------------------|------------------|----|
| Fe       | HSC    | -          | -                | -                | -  |
| Fe3H*    | MP     | mp-984102  | 0.600378         | 0.566751         | 4  |
| FeH      | MP     | mp-1009077 | 0                | -0.06726         | 2  |
| FeH3     | MP     | mp-1018061 | 0.182623         | 0.148996         | 4  |
| FeH4*    | MP     | mp-1079939 | 0.243415         | 0.216513         | 5  |
| Fe12N5*  | MP     | mp-27908   | 0.026315         | -0.15899         | 17 |
| Fe24N11* | MP     | mp-684887  | 0.049817         | -0.14807         | 35 |
| Fe2N     | HSC    | -          | -                | -                | -  |
| Fe2N**   | MP     | mp-21476   | 0.056841         | -0.15293         | 3  |
| Fe3N     | MP     | mp-1804    | 0                | -0.15778         | 4  |
| Fe4N     | HSC    | -          | -                | -                | -  |
| Fe4N**   | MP     | mp-535     | 0.069992         | -0.05623         | 5  |
| Fe8N     | MP     | mp-555     | 0.001092         | -0.06903         | 9  |
| Fe8N3    | MP     | mp-673174  | 0.017508         | -0.15445         | 11 |
| FeN      | MP     | mp-6988    | 0                | -0.31375         | 2  |
| FeN2*    | MP     | mp-1080202 | 0.148476         | -0.06069         | 3  |

Table S7: The Li-based system

| Formula   | Source | mpid       | E_hull [eV/atom] | E_form [eV/atom] | n  |
|-----------|--------|------------|------------------|------------------|----|
| Li        | HSC    | -          | -                | -                | -  |
| LiH       | HSC    | -          | -                | -                | -  |
| LiH**     | MP     | mp-23703   | 0                | -0.48936         | 2  |
| Li(H3N)4* | MP     | mp-707454  | 0.02814          | -0.41663         | 17 |
| Li15H9N8* | MP     | mp-1201065 | 0.005666         | -0.5779          | 32 |
| Li2HN*    | MP     | mp-1189725 | 0                | -0.58257         | 4  |
| Li3(HN)2* | MP     | mp-1210795 | 0.184018         | -0.38728         | 7  |
| Li3H3N2*  | MP     | mp-977164  | 0.0236           | -0.56295         | 8  |
| Li4HN*    | MP     | mp-30228   | 0                | -0.4702          | 6  |
| Li7H5N4*  | MP     | mp-1200910 | 0.005943         | -0.57862         | 16 |



|        |     |            |          |          |   |
|--------|-----|------------|----------|----------|---|
| LiH2N  | MP  | mp-23702   | 0        | -0.59054 | 4 |
| Li2N*  | MP  | mp-1062345 | 0.263625 | -0.17276 | 3 |
| Li3N   | HSC | -          | -        | -        | - |
| Li3N** | MP  | mp-2251    | 0        | -0.4825  | 4 |
| Li3N2* | MP  | mp-1222421 | 0.759322 | 0.359824 | 5 |
| LiN*   | MP  | mp-1059612 | 1.335792 | 0.99163  | 2 |
| LiN3   | MP  | mp-2659    | 0        | -0.20582 | 4 |

Table S8: The Mn-based system

| Formula     | Source | mpid       | E_hull [eV/atom] | E_form [eV/atom] | n  |
|-------------|--------|------------|------------------|------------------|----|
| Mn          | HSC    | -          | -                | -                | -  |
| Mn29H2*     | MP     | mp-1222194 | 0                | -0.01634         | 31 |
| MnH*        | MP     | mp-24416   | 0.150346         | 0.141612         | 2  |
| Mn(H15N8)2* | MP     | mp-1195097 | 0.009936         | -0.36817         | 47 |
| Mn(H2N)2*   | MP     | mp-703486  | 0.503855         | 0.08049          | 7  |
| Mn2N        | MP     | mp-9981    | 0                | -0.43548         | 3  |
| Mn3N2       | HSC    | -          | -                | -                | -  |
| Mn3N4*      | MP     | mp-1080204 | 0.076293         | -0.20366         | 7  |
| Mn4N        | HSC    | -          | -                | -                | -  |
| Mn5N2       | HSC    | -          | -                | -                | -  |
| MnN         | MP     | mp-1009130 | 0.015086         | -0.31153         | 2  |

Table S9: The Mo-based system

| Formula  | Source | mpid       | E_hull [eV/atom] | E_form [eV/atom] | n  |
|----------|--------|------------|------------------|------------------|----|
| Mo       | HSC    | -          | -                | -                | -  |
| Mo2      | HSC    | -          | -                | -                | -  |
| Mo3H     | MP     | mp-975912  | 0.850179         | 0.850179         | 4  |
| MoH      | MP     | mp-24417   | 0.393956         | 0.393956         | 2  |
| Mo15N16* | MP     | mp-530081  | 0                | -0.53798         | 31 |
| Mo2N     | HSC    | -          | -                | -                | -  |
| Mo2N**   | MP     | mp-27953   | 0.004064         | -0.36008         | 3  |
| Mo2N3*   | MP     | mp-1080195 | 0.155517         | -0.28922         | 5  |
| Mo3N2*   | MP     | mp-32652   | 0.571802         | 0.134825         | 5  |
| MoN      | HSC    | -          | -                | -                | -  |
| MoN**    | MP     | mp-2811    | 0                | -0.54622         | 2  |
| MoN2     | MP     | mp-1402363 | 0.274727         | -0.09588         | 3  |

Table S10: The Ni-based system

| Formula   | Source | mpid      | E_hull [eV/atom] | E_form [eV/atom] | n |
|-----------|--------|-----------|------------------|------------------|---|
| Ni        | HSC    | -         | -                | -                | - |
| Ni2H      | MP     | mp-753890 | 0.046298         | 0.03888          | 3 |
| Ni3H*     | MP     | mp-976948 | 0.515277         | 0.509713         | 4 |
| NiH       | MP     | mp-24719  | 0                | -0.01113         | 2 |
| NiH0.5    | HSC    | -         | -                | -                | - |
| NiH0.59   | HSC    | -         | -                | -                | - |
| NiH0.68   | HSC    | -         | -                | -                | - |
| NiH3*     | MP     | mp-973963 | 0.219315         | 0.213751         | 4 |
| Ni(H2N)2* | MP     | mp-28686  | 0.024374         | -0.24142         | 7 |

|        |     |            |          |          |   |
|--------|-----|------------|----------|----------|---|
| Ni3N   | HSC | -          | -        | -        | - |
| Ni3N** | MP  | mp-2033    | 0.014725 | 0.014725 | 4 |
| Ni4N*  | MP  | mp-1094090 | 0.066688 | 0.066688 | 5 |
| Ni4N3* | MP  | mp-1094084 | 0.29447  | 0.29447  | 7 |
| NiN    | MP  | mp-973933  | 0.31253  | 0.31253  | 2 |

Table S11: The Sr-based system

| Formula   | Source | mpid       | E_hull [eV/atom] | E_form [eV/atom] | n |
|-----------|--------|------------|------------------|------------------|---|
| Sr        | HSC    | -          | -                | -                | - |
| Sr3H*     | MP     | mp-1187129 | 0.68131          | 0.438468         | 4 |
| SrH2      | HSC    | -          | -                | -                | - |
| SrH2**    | MP     | mp-23714   | 0                | -0.64758         | 3 |
| SrH3      | MP     | mp-978856  | 0.340568         | -0.14512         | 4 |
| Sr(H2N)2* | MP     | mp-643905  | 0                | -0.65119         | 7 |
| Sr2HN     | MP     | mp-690794  | 0                | -0.75828         | 4 |
| SrHN*     | MP     | mp-1187172 | 0                | -0.82252         | 3 |
| Sr2N      | MP     | mp-1245    | 0                | -0.67197         | 3 |
| Sr3N2     | HSC    | -          | -                | -                | - |
| Sr3N2**   | MP     | mp-986716  | 0.03106          | -0.63965         | 5 |
| Sr4N3*    | MP     | mp-1173210 | 0.145913         | -0.52426         | 7 |
| SrN       | MP     | mp-29973   | 0                | -0.66883         | 2 |
| SrN2      | MP     | mp-10564   | 0                | -0.62324         | 3 |
| SrN6*     | MP     | mp-2131    | 0.009174         | -0.25793         | 7 |

Table S12: The W-based system

| Formula | Source | mpid       | E_hull [eV/atom] | E_form [eV/atom] | n  |
|---------|--------|------------|------------------|------------------|----|
| W       | HSC    | -          | -                | -                | -  |
| W2N     | HSC    | -          | -                | -                | -  |
| W2N3*   | MP     | mp-1216242 | 0                | -0.5573          | 5  |
| W3N4    | MP     | mp-8102    | 0.365057         | -0.16571         | 7  |
| W7N6*   | MP     | mp-1216967 | 0.145784         | -0.28291         | 13 |
| WN      | MP     | mp-991     | 0.288264         | -0.17616         | 2  |
| WN18*   | MP     | mp-672264  | 0.304768         | 0.231438         | 19 |
| WN2     | MP     | mp-2679804 | 0.063144         | -0.40128         | 3  |
| WN6*    | MP     | mp-1208477 | 2.410438         | 2.2114           | 7  |

Table S13: The Zn-based system

| Formula     | Source | mpid       | E_hull [eV/atom] | E_form [eV/atom] | n  |
|-------------|--------|------------|------------------|------------------|----|
| Zn          | HSC    | -          | -                | -                | -  |
| ZnH*        |        | mp-971820  | 0.326733         | 0.326733         | 2  |
| ZnH6*       |        | mp-1207466 | 0.028949         | 0.028949         | 7  |
| Zn(H15N8)2* |        | mp-1195558 | 0                | -0.37232         | 47 |
| Zn(H2N)2*   |        | mp-24694   | 0                | -0.41502         | 7  |
| Zn(H4N5)2*  |        | mp-1188715 | 0.12868          | -0.14239         | 19 |
| Zn3N*       |        | mp-981366  | 0.769759         | 0.742932         | 4  |
| Zn3N2       | HSC    | -          | -                | -                | -  |
| Zn3N2**     |        | mp-9460    | 0                | -0.04292         | 5  |
| ZnN         |        | mp-971911  | 0.555736         | 0.519967         | 2  |

|       |  |            |          |         |   |
|-------|--|------------|----------|---------|---|
| ZnN6* |  | mp-1103897 | 0.089476 | 0.08187 | 7 |
|-------|--|------------|----------|---------|---|

#### 1.4 Reactions

The following tables contain all reactions considered in the combined theoretical and experimental screenings. All possible combinations with the materials listed in Section 1.2 have been included. '*dm\_stoich [%]*' is the stoichiometric weight change in % from the reactant solid to the product solid. '*h298 [kJ/mol]*' is the standard enthalpy change of the reaction at 25°C. '*T\_eq [°C]*' is the equilibrium temperature. '*Type*' denotes if the reaction has an exergonic region, i.e. reaction proceeds spontaneously in the investigated temperature range 0-800°C.

Table S14: The Al-based system

| ID     | Reaction                                                                     | dm_stoich [%] | h298 [kJ/mol] | T_eq [°C] | Type       |
|--------|------------------------------------------------------------------------------|---------------|---------------|-----------|------------|
| Al-R01 | $6\text{Al} + \text{H}_2 = 2\text{Al}_3\text{H}$                             | 1.25          | -             | -         | -          |
| Al-R02 | $1/6\text{Al} + \text{H}_2 = 1/6\text{AlH}_{12}$                             | 44.83         | -             | -         | -          |
| Al-R03 | $2/3\text{Al} + \text{H}_2 = 2/3\text{AlH}_3$                                | 11.21         | -7.6          | -         | endergonic |
| Al-R04 | $1/3\text{Al} + \text{H}_2 = 1/3\text{AlH}_6$                                | 22.41         | -             | -         | -          |
| Al-R05 | $2/35\text{Al}_3\text{H} + \text{H}_2 = 6/35\text{AlH}_{12}$                 | 43.05         | -             | -         | -          |
| Al-R06 | $1/4\text{Al}_3\text{H} + \text{H}_2 = 3/4\text{AlH}_3$                      | 9.84          | -             | -         | -          |
| Al-R07 | $2/17\text{Al}_3\text{H} + \text{H}_2 = 6/17\text{AlH}_6$                    | 20.91         | -             | -         | -          |
| Al-R08 | $2/9\text{AlH}_3 + \text{H}_2 = 2/9\text{AlH}_{12}$                          | 30.23         | -             | -         | -          |
| Al-R09 | $2/3\text{AlH}_3 + \text{H}_2 = 2/3\text{AlH}_6$                             | 10.08         | -             | -         | -          |
| Al-R10 | $1/3\text{AlH}_6 + \text{H}_2 = 1/3\text{AlH}_{12}$                          | 18.31         | -             | -         | -          |
| Al-R11 | $6\text{AlN} + \text{H}_2 = 2\text{Al}_3\text{H} + 3\text{N}_2$              | -33.35        | -             | -         | -          |
| Al-R12 | $1/6\text{AlN} + \text{H}_2 = 1/6\text{AlH}_{12} + 1/12\text{N}_2$           | -4.66         | -             | -         | -          |
| Al-R13 | $2/3\text{AlN} + \text{H}_2 = 2/3\text{AlH}_3 + 1/3\text{N}_2$               | -26.79        | 204.39        | -         | endergonic |
| Al-R14 | $1/3\text{AlN} + \text{H}_2 = 1/3\text{AlH}_6 + 1/6\text{N}_2$               | -19.42        | -             | -         | -          |
| Al-R15 | $2/3\text{AlN} + \text{H}_2 = 2/3\text{Al} + 2/3\text{NH}_3$                 | -34.17        | 181.39        | -         | endergonic |
| Al-R16 | $3/5\text{AlN} + \text{H}_2 = 1/5\text{Al}_3\text{H} + 3/5\text{NH}_3$       | -33.35        | -             | -         | -          |
| Al-R17 | $2/15\text{AlN} + \text{H}_2 = 2/15\text{AlH}_{12} + 2/15\text{NH}_3$        | -4.66         | -             | -         | -          |
| Al-R18 | $1/3\text{AlN} + \text{H}_2 = 1/3\text{AlH}_3 + 1/3\text{NH}_3$              | -26.79        | 86.9          | -         | endergonic |
| Al-R19 | $2/9\text{AlN} + \text{H}_2 = 2/9\text{AlH}_6 + 2/9\text{NH}_3$              | -19.42        | -             | -         | -          |
| Al-R20 | $2\text{Al} + \text{N}_2 = 2\text{AlN}$                                      | 51.91         | -635.97       | -         | exergonic  |
| Al-R21 | $2/3\text{Al}_3\text{H} + \text{N}_2 = 2\text{AlN} + 1/3\text{H}_2$          | 50.04         | -             | -         | -          |
| Al-R22 | $6\text{Al}_3\text{H} + \text{N}_2 = 18\text{Al} + 2\text{NH}_3$             | -1.23         | -             | -         | -          |
| Al-R23 | $3/5\text{Al}_3\text{H} + \text{N}_2 = 9/5\text{AlN} + 1/5\text{NH}_3$       | 50.04         | -             | -         | -          |
| Al-R24 | $2\text{AlH}_{12} + \text{N}_2 = 2\text{AlN} + 12\text{H}_2$                 | 4.89          | -             | -         | -          |
| Al-R25 | $1/2\text{AlH}_{12} + \text{N}_2 = 1/2\text{Al} + 2\text{NH}_3$              | -30.95        | -             | -         | -          |
| Al-R26 | $18/35\text{AlH}_{12} + \text{N}_2 = 6/35\text{Al}_3\text{H} + 2\text{NH}_3$ | -30.09        | -             | -         | -          |
| Al-R27 | $2/3\text{AlH}_{12} + \text{N}_2 = 2/3\text{AlH}_3 + 2\text{NH}_3$           | -23.22        | -             | -         | -          |
| Al-R28 | $\text{AlH}_{12} + \text{N}_2 = \text{AlH}_6 + 2\text{NH}_3$                 | -15.48        | -             | -         | -          |
| Al-R29 | $2/5\text{AlH}_{12} + \text{N}_2 = 2/5\text{AlN} + 8/5\text{NH}_3$           | 4.89          | -             | -         | -          |

|        |                                                                           |        |         |   |           |
|--------|---------------------------------------------------------------------------|--------|---------|---|-----------|
| Al-R30 | $2\text{AlH}_3 + \text{N}_2 = 2\text{AlN} + 3\text{H}_2$                  | 36.6   | -613.17 | - | exergonic |
| Al-R31 | $2\text{AlH}_3 + \text{N}_2 = 2\text{Al} + 2\text{NH}_3$                  | -10.08 | -69     | - | exergonic |
| Al-R32 | $9/4\text{AlH}_3 + \text{N}_2 = 3/4\text{Al}_3\text{H} + 2\text{NH}_3$    | -8.96  | -       | - | -         |
| Al-R33 | $\text{AlH}_3 + \text{N}_2 = \text{AlN} + \text{NH}_3$                    | 36.6   | -352.48 | - | exergonic |
| Al-R34 | $2\text{AlH}_6 + \text{N}_2 = 2\text{AlN} + 6\text{H}_2$                  | 24.1   | -       | - | -         |
| Al-R35 | $\text{AlH}_6 + \text{N}_2 = \text{Al} + 2\text{NH}_3$                    | -18.31 | -       | - | -         |
| Al-R36 | $18/17\text{AlH}_6 + \text{N}_2 = 6/17\text{Al}_3\text{H} + 2\text{NH}_3$ | -17.29 | -       | - | -         |
| Al-R37 | $2\text{AlH}_6 + \text{N}_2 = 2\text{AlH}_3 + 2\text{NH}_3$               | -9.16  | -       | - | -         |
| Al-R38 | $2/3\text{AlH}_6 + \text{N}_2 = 2/3\text{AlN} + 4/3\text{NH}_3$           | 24.1   | -       | - | -         |

Table S15: The Ca-based system

| ID      | Reaction                                                                                                  | dm_stoich [%] | h298 [kJ/mol] | T_eq [°C] | Type      |
|---------|-----------------------------------------------------------------------------------------------------------|---------------|---------------|-----------|-----------|
| Ca-R001 | $\text{Ca} + \text{H}_2 = \text{CaH}_2$                                                                   | 5.03          | -176.98       | -         | exergonic |
| Ca-R002 | $2/3\text{Ca} + \text{H}_2 = 2/3\text{CaH}_3$                                                             | 7.55          | -             | -         | -         |
| Ca-R003 | $\text{Ca}(\text{H}_2\text{N})_2 + \text{H}_2 = \text{Ca} + 2\text{NH}_3$                                 | -44.43        | -             | -         | -         |
| Ca-R004 | $1/2\text{Ca}(\text{H}_2\text{N})_2 + \text{H}_2 = 1/2\text{CaH}_2 + \text{NH}_3$                         | -41.64        | -             | -         | -         |
| Ca-R005 | $2/5\text{Ca}(\text{H}_2\text{N})_2 + \text{H}_2 = 2/5\text{CaH}_3 + 4/5\text{NH}_3$                      | -40.24        | -             | -         | -         |
| Ca-R006 | $32/9\text{Ca}(\text{H}_2\text{N})_2 + \text{H}_2 = 2/9\text{Ca}_{16}\text{HN}_8 + 16/3\text{NH}_3$       | -34.63        | -             | -         | -         |
| Ca-R007 | $2\text{Ca}(\text{H}_2\text{N})_2 + \text{H}_2 = \text{Ca}_2\text{HN} + 3\text{NH}_3$                     | -34.02        | -             | -         | -         |
| Ca-R008 | $16/7\text{Ca}(\text{H}_2\text{N})_2 + \text{H}_2 = 2/7\text{Ca}_8\text{H}_3\text{N}_4 + 24/7\text{NH}_3$ | -34.2         | -             | -         | -         |
| Ca-R009 | $4\text{Ca}(\text{H}_2\text{N})_2 + \text{H}_2 = 2\text{Ca}_2\text{N} + 6\text{NH}_3$                     | -34.72        | -             | -         | -         |
| Ca-R010 | $1/11\text{Ca}_{11}\text{N}_8 + \text{H}_2 = \text{CaH}_2 + 4/11\text{N}_2$                               | -16.26        | -             | -         | -         |
| Ca-R011 | $2/33\text{Ca}_{11}\text{N}_8 + \text{H}_2 = 2/3\text{CaH}_3 + 8/33\text{N}_2$                            | -14.25        | -             | -         | -         |
| Ca-R012 | $32/11\text{Ca}_{11}\text{N}_8 + \text{H}_2 = 2\text{Ca}_{16}\text{HN}_8 + 40/11\text{N}_2$               | -6.21         | -             | -         | -         |
| Ca-R013 | $4/11\text{Ca}_{11}\text{N}_8 + \text{H}_2 = 2\text{Ca}_2\text{HN} + 5/11\text{N}_2$                      | -5.33         | -             | -         | -         |
| Ca-R014 | $16/33\text{Ca}_{11}\text{N}_8 + \text{H}_2 = 2/3\text{Ca}_8\text{H}_3\text{N}_4 + 20/33\text{N}_2$       | -5.58         | -             | -         | -         |
| Ca-R015 | $1/12\text{Ca}_{11}\text{N}_8 + \text{H}_2 = 11/12\text{Ca} + 2/3\text{NH}_3$                             | -20.27        | -             | -         | -         |
| Ca-R016 | $1/23\text{Ca}_{11}\text{N}_8 + \text{H}_2 = 11/23\text{CaH}_2 + 8/23\text{NH}_3$                         | -16.26        | -             | -         | -         |
| Ca-R017 | $2/57\text{Ca}_{11}\text{N}_8 + \text{H}_2 = 22/57\text{CaH}_3 + 16/57\text{NH}_3$                        | -14.25        | -             | -         | -         |
| Ca-R018 | $32/131\text{Ca}_{11}\text{N}_8 + \text{H}_2 = 22/131\text{Ca}_{16}\text{HN}_8 + 80/131\text{NH}_3$       | -6.21         | -             | -         | -         |
| Ca-R019 | $2/13\text{Ca}_{11}\text{N}_8 + \text{H}_2 = 11/13\text{Ca}_2\text{HN} + 5/13\text{NH}_3$                 | -5.33         | -             | -         | -         |
| Ca-R020 | $16/93\text{Ca}_{11}\text{N}_8 + \text{H}_2 = 22/93\text{Ca}_8\text{H}_3\text{N}_4 + 40/93\text{NH}_3$    | -5.58         | -             | -         | -         |
| Ca-R021 | $4/15\text{Ca}_{11}\text{N}_8 + \text{H}_2 = 22/15\text{Ca}_2\text{N} + 2/3\text{NH}_3$                   | -6.33         | -             | -         | -         |
| Ca-R022 | $\text{Ca}_{11}\text{N}_8 + \text{H}_2 = 11/3\text{Ca}_3\text{N}_2 + 2/3\text{NH}_3$                      | -1.69         | -             | -         | -         |
| Ca-R023 | $2/31\text{Ca}_{16}\text{HN}_8 + \text{H}_2 = 32/31\text{CaH}_2 + 8/31\text{N}_2$                         | -10.71        | -             | -         | -         |
| Ca-R024 | $2/47\text{Ca}_{16}\text{HN}_8 + \text{H}_2 = 32/47\text{CaH}_3 + 8/47\text{N}_2$                         | -8.57         | -             | -         | -         |
| Ca-R025 | $2/7\text{Ca}_{16}\text{HN}_8 + \text{H}_2 = 16/7\text{Ca}_2\text{HN}$                                    | 0.94          | -             | -         | -         |
| Ca-R026 | $2/5\text{Ca}_{16}\text{HN}_8 + \text{H}_2 = 4/5\text{Ca}_8\text{H}_3\text{N}_4$                          | 0.67          | -             | -         | -         |
| Ca-R027 | $2/23\text{Ca}_{16}\text{HN}_8 + \text{H}_2 = 32/23\text{Ca} + 16/23\text{NH}_3$                          | -14.99        | -             | -         | -         |
| Ca-R028 | $2/55\text{Ca}_{16}\text{HN}_8 + \text{H}_2 = 32/55\text{CaH}_2 + 16/55\text{NH}_3$                       | -10.71        | -             | -         | -         |
| Ca-R029 | $2/71\text{Ca}_{16}\text{HN}_8 + \text{H}_2 = 32/71\text{CaH}_3 + 16/71\text{NH}_3$                       | -8.57         | -             | -         | -         |
| Ca-R030 | $2/3\text{Ca}_2\text{HN} + \text{H}_2 = 4/3\text{CaH}_2 + 1/3\text{N}_2$                                  | -11.54        | -             | -         | -         |
| Ca-R031 | $2/5\text{Ca}_2\text{HN} + \text{H}_2 = 4/5\text{CaH}_3 + 1/5\text{N}_2$                                  | -9.42         | -             | -         | -         |
| Ca-R032 | $\text{Ca}_2\text{HN} + \text{H}_2 = 2\text{Ca} + \text{NH}_3$                                            | -15.78        | -             | -         | -         |
| Ca-R033 | $1/3\text{Ca}_2\text{HN} + \text{H}_2 = 2/3\text{CaH}_2 + 1/3\text{NH}_3$                                 | -11.54        | -             | -         | -         |

|         |                                                                                                  |        |        |       |            |
|---------|--------------------------------------------------------------------------------------------------|--------|--------|-------|------------|
| Ca-R034 | $1/4\text{Ca}_2\text{HN} + \text{H}_2 = 1/2\text{CaH}_3 + 1/4\text{NH}_3$                        | -9.42  | -      | -     | -          |
| Ca-R035 | $1/2\text{Ca}_2\text{N} + \text{H}_2 = \text{CaH}_2 + 1/4\text{N}_2$                             | -10.59 | -47.06 | 235.2 | exergonic  |
| Ca-R036 | $1/3\text{Ca}_2\text{N} + \text{H}_2 = 2/3\text{CaH}_3 + 1/6\text{N}_2$                          | -8.45  | -      | -     | -          |
| Ca-R037 | $16\text{Ca}_2\text{N} + \text{H}_2 = 2\text{Ca}_{16}\text{HN}_8$                                | 0.13   | -      | -     | -          |
| Ca-R038 | $2\text{Ca}_2\text{N} + \text{H}_2 = 2\text{Ca}_2\text{HN}$                                      | 1.07   | -      | -     | -          |
| Ca-R039 | $8/3\text{Ca}_2\text{N} + \text{H}_2 = 2/3\text{Ca}_8\text{H}_3\text{N}_4$                       | 0.8    | -      | -     | -          |
| Ca-R040 | $2/3\text{Ca}_2\text{N} + \text{H}_2 = 4/3\text{Ca} + 2/3\text{NH}_3$                            | -14.88 | 142.63 | -     | endergonic |
| Ca-R041 | $2/7\text{Ca}_2\text{N} + \text{H}_2 = 4/7\text{CaH}_2 + 2/7\text{NH}_3$                         | -10.59 | -40    | 216.4 | exergonic  |
| Ca-R042 | $2/9\text{Ca}_2\text{N} + \text{H}_2 = 4/9\text{CaH}_3 + 2/9\text{NH}_3$                         | -8.45  | -      | -     | -          |
| Ca-R043 | $1/3\text{Ca}_3\text{N}_2 + \text{H}_2 = \text{CaH}_2 + 1/3\text{N}_2$                           | -14.82 | -33.31 | 259.7 | exergonic  |
| Ca-R044 | $2/9\text{Ca}_3\text{N}_2 + \text{H}_2 = 2/3\text{CaH}_3 + 2/9\text{N}_2$                        | -12.78 | -      | -     | -          |
| Ca-R045 | $32/3\text{Ca}_3\text{N}_2 + \text{H}_2 = 2\text{Ca}_{16}\text{HN}_8 + 8/3\text{N}_2$            | -4.6   | -      | -     | -          |
| Ca-R046 | $4/3\text{Ca}_3\text{N}_2 + \text{H}_2 = 2\text{Ca}_2\text{HN} + 1/3\text{N}_2$                  | -3.7   | -      | -     | -          |
| Ca-R047 | $16/9\text{Ca}_3\text{N}_2 + \text{H}_2 = 2/3\text{Ca}_8\text{H}_3\text{N}_4 + 4/9\text{N}_2$    | -3.96  | -      | -     | -          |
| Ca-R048 | $1/3\text{Ca}_3\text{N}_2 + \text{H}_2 = \text{Ca} + 2/3\text{NH}_3$                             | -18.9  | 113.07 | -     | endergonic |
| Ca-R049 | $1/6\text{Ca}_3\text{N}_2 + \text{H}_2 = 1/2\text{CaH}_2 + 1/3\text{NH}_3$                       | -14.82 | -31.96 | 220.2 | exergonic  |
| Ca-R050 | $2/15\text{Ca}_3\text{N}_2 + \text{H}_2 = 2/5\text{CaH}_3 + 4/15\text{NH}_3$                     | -12.78 | -      | -     | -          |
| Ca-R051 | $32/27\text{Ca}_3\text{N}_2 + \text{H}_2 = 2/9\text{Ca}_{16}\text{HN}_8 + 16/27\text{NH}_3$      | -4.6   | -      | -     | -          |
| Ca-R052 | $2/3\text{Ca}_3\text{N}_2 + \text{H}_2 = \text{Ca}_2\text{HN} + 1/3\text{NH}_3$                  | -3.7   | -      | -     | -          |
| Ca-R053 | $16/21\text{Ca}_3\text{N}_2 + \text{H}_2 = 2/7\text{Ca}_8\text{H}_3\text{N}_4 + 8/21\text{NH}_3$ | -3.96  | -      | -     | -          |
| Ca-R054 | $4/3\text{Ca}_3\text{N}_2 + \text{H}_2 = 2\text{Ca}_2\text{N} + 2/3\text{NH}_3$                  | -4.72  | 24.39  | 170.3 | exergonic  |
| Ca-R055 | $2/13\text{Ca}_8\text{H}_3\text{N}_4 + \text{H}_2 = 16/13\text{CaH}_2 + 4/13\text{N}_2$          | -11.31 | -      | -     | -          |
| Ca-R056 | $2/21\text{Ca}_8\text{H}_3\text{N}_4 + \text{H}_2 = 16/21\text{CaH}_3 + 4/21\text{N}_2$          | -9.18  | -      | -     | -          |
| Ca-R057 | $2\text{Ca}_8\text{H}_3\text{N}_4 + \text{H}_2 = 8\text{Ca}_2\text{HN}$                          | 0.27   | -      | -     | -          |
| Ca-R058 | $2/9\text{Ca}_8\text{H}_3\text{N}_4 + \text{H}_2 = 16/9\text{Ca} + 8/9\text{NH}_3$               | -15.55 | -      | -     | -          |
| Ca-R059 | $2/25\text{Ca}_8\text{H}_3\text{N}_4 + \text{H}_2 = 16/25\text{CaH}_2 + 8/25\text{NH}_3$         | -11.31 | -      | -     | -          |
| Ca-R060 | $2/33\text{Ca}_8\text{H}_3\text{N}_4 + \text{H}_2 = 16/33\text{CaH}_3 + 8/33\text{NH}_3$         | -9.18  | -      | -     | -          |
| Ca-R061 | $2\text{CaH}_2 + \text{H}_2 = 2\text{CaH}_3$                                                     | 2.39   | -      | -     | -          |
| Ca-R062 | $2\text{CaHN} + \text{H}_2 = 2\text{CaH}_2 + \text{N}_2$                                         | -23.59 | -      | -     | -          |
| Ca-R063 | $\text{CaHN} + \text{H}_2 = \text{CaH}_3 + 1/2\text{N}_2$                                        | -21.77 | -      | -     | -          |
| Ca-R064 | $\text{CaHN} + \text{H}_2 = \text{Ca} + \text{NH}_3$                                             | -27.25 | -      | -     | -          |
| Ca-R065 | $1/2\text{CaHN} + \text{H}_2 = 1/2\text{CaH}_2 + 1/2\text{NH}_3$                                 | -23.59 | -      | -     | -          |
| Ca-R066 | $2/5\text{CaHN} + \text{H}_2 = 2/5\text{CaH}_3 + 2/5\text{NH}_3$                                 | -21.77 | -      | -     | -          |
| Ca-R067 | $32/9\text{CaHN} + \text{H}_2 = 2/9\text{Ca}_{16}\text{HN}_8 + 16/9\text{NH}_3$                  | -14.43 | -      | -     | -          |
| Ca-R068 | $2\text{CaHN} + \text{H}_2 = \text{Ca}_2\text{HN} + \text{NH}_3$                                 | -13.63 | -      | -     | -          |
| Ca-R069 | $16/7\text{CaHN} + \text{H}_2 = 2/7\text{Ca}_8\text{H}_3\text{N}_4 + 8/7\text{NH}_3$             | -13.86 | -      | -     | -          |
| Ca-R070 | $4\text{CaHN} + \text{H}_2 = 2\text{Ca}_2\text{N} + 2\text{NH}_3$                                | -14.54 | -      | -     | -          |
| Ca-R071 | $\text{CaN} + \text{H}_2 = \text{CaH}_2 + 1/2\text{N}_2$                                         | -22.17 | -      | -     | -          |
| Ca-R072 | $2/3\text{CaN} + \text{H}_2 = 2/3\text{CaH}_3 + 1/3\text{N}_2$                                   | -20.31 | -      | -     | -          |
| Ca-R073 | $32\text{CaN} + \text{H}_2 = 2\text{Ca}_{16}\text{HN}_8 + 8\text{N}_2$                           | -12.83 | -      | -     | -          |
| Ca-R074 | $4\text{CaN} + \text{H}_2 = 2\text{Ca}_2\text{HN} + \text{N}_2$                                  | -12.02 | -      | -     | -          |
| Ca-R075 | $16/3\text{CaN} + \text{H}_2 = 2/3\text{Ca}_8\text{H}_3\text{N}_4 + 4/3\text{N}_2$               | -12.25 | -      | -     | -          |
| Ca-R076 | $2\text{CaN} + \text{H}_2 = 2\text{CaHN}$                                                        | 1.86   | -      | -     | -          |
| Ca-R077 | $2/3\text{CaN} + \text{H}_2 = 2/3\text{Ca} + 2/3\text{NH}_3$                                     | -25.9  | -      | -     | -          |
| Ca-R078 | $2/5\text{CaN} + \text{H}_2 = 2/5\text{CaH}_2 + 2/5\text{NH}_3$                                  | -22.17 | -      | -     | -          |
| Ca-R079 | $1/3\text{CaN} + \text{H}_2 = 1/3\text{CaH}_3 + 1/3\text{NH}_3$                                  | -20.31 | -      | -     | -          |
| Ca-R080 | $32/25\text{CaN} + \text{H}_2 = 2/25\text{Ca}_{16}\text{HN}_8 + 16/25\text{NH}_3$                | -12.83 | -      | -     | -          |
| Ca-R081 | $\text{CaN} + \text{H}_2 = 1/2\text{Ca}_2\text{HN} + 1/2\text{NH}_3$                             | -12.02 | -      | -     | -          |
| Ca-R082 | $16/15\text{CaN} + \text{H}_2 = 2/15\text{Ca}_8\text{H}_3\text{N}_4 + 8/15\text{NH}_3$           | -12.25 | -      | -     | -          |

|         |                                                                                              |        |         |       |            |
|---------|----------------------------------------------------------------------------------------------|--------|---------|-------|------------|
| Ca-R083 | $22/9\text{CaN} + \text{H}_2 = 2/9\text{Ca}_{11}\text{N}_8 + 2/3\text{NH}_3$                 | -7.06  | -       | -     | -          |
| Ca-R084 | $4/3\text{CaN} + \text{H}_2 = 2/3\text{Ca}_2\text{N} + 2/3\text{NH}_3$                       | -12.95 | -       | -     | -          |
| Ca-R085 | $2\text{CaN} + \text{H}_2 = 2/3\text{Ca}_3\text{N}_2 + 2/3\text{NH}_3$                       | -8.63  | -       | -     | -          |
| Ca-R086 | $\text{CaN}_2 + \text{H}_2 = \text{CaH}_2 + \text{N}_2$                                      | -38.18 | 8.05    | -     | exergonic  |
| Ca-R087 | $2/3\text{CaN}_2 + \text{H}_2 = 2/3\text{CaH}_3 + 2/3\text{N}_2$                             | -36.7  | -       | -     | -          |
| Ca-R088 | $1/2\text{CaN}_2 + \text{H}_2 = 1/2\text{Ca}(\text{H}_2\text{N})_2$                          | 5.92   | -       | -     | -          |
| Ca-R089 | $32\text{CaN}_2 + \text{H}_2 = 2\text{Ca}_{16}\text{HN}_8 + 24\text{N}_2$                    | -30.76 | -       | -     | -          |
| Ca-R090 | $4\text{CaN}_2 + \text{H}_2 = 2\text{Ca}_2\text{HN} + 3\text{N}_2$                           | -30.12 | -       | -     | -          |
| Ca-R091 | $16/3\text{CaN}_2 + \text{H}_2 = 2/3\text{Ca}_8\text{H}_3\text{N}_4 + 4\text{N}_2$           | -30.3  | -       | -     | -          |
| Ca-R092 | $2\text{CaN}_2 + \text{H}_2 = 2\text{CaHN} + \text{N}_2$                                     | -19.09 | -       | -     | -          |
| Ca-R093 | $1/3\text{CaN}_2 + \text{H}_2 = 1/3\text{Ca} + 2/3\text{NH}_3$                               | -41.14 | 31.08   | -     | endergonic |
| Ca-R094 | $1/4\text{CaN}_2 + \text{H}_2 = 1/4\text{CaH}_2 + 1/2\text{NH}_3$                            | -38.18 | -20.94  | 228.3 | exergonic  |
| Ca-R095 | $2/9\text{CaN}_2 + \text{H}_2 = 2/9\text{CaH}_3 + 4/9\text{NH}_3$                            | -36.7  | -       | -     | -          |
| Ca-R096 | $32/73\text{CaN}_2 + \text{H}_2 = 2/73\text{Ca}_{16}\text{HN}_8 + 48/73\text{NH}_3$          | -30.76 | -       | -     | -          |
| Ca-R097 | $2/5\text{CaN}_2 + \text{H}_2 = 1/5\text{Ca}_2\text{HN} + 3/5\text{NH}_3$                    | -30.12 | -       | -     | -          |
| Ca-R098 | $16/39\text{CaN}_2 + \text{H}_2 = 2/39\text{Ca}_8\text{H}_3\text{N}_4 + 8/13\text{NH}_3$     | -30.3  | -       | -     | -          |
| Ca-R099 | $1/2\text{CaN}_2 + \text{H}_2 = 1/2\text{CaHN} + 1/2\text{NH}_3$                             | -19.09 | -       | -     | -          |
| Ca-R100 | $11/21\text{CaN}_2 + \text{H}_2 = 1/21\text{Ca}_{11}\text{N}_8 + 2/3\text{NH}_3$             | -26.18 | -       | -     | -          |
| Ca-R101 | $4/9\text{CaN}_2 + \text{H}_2 = 2/9\text{Ca}_2\text{N} + 2/3\text{NH}_3$                     | -30.86 | -6.1    | 271.8 | exergonic  |
| Ca-R102 | $1/2\text{CaN}_2 + \text{H}_2 = 1/6\text{Ca}_3\text{N}_2 + 2/3\text{NH}_3$                   | -27.43 | -9.92   | 250.3 | exergonic  |
| Ca-R103 | $2/3\text{CaN}_2 + \text{H}_2 = 2/3\text{CaN} + 2/3\text{NH}_3$                              | -20.57 | -       | -     | -          |
| Ca-R104 | $\text{CaN}_6 + \text{H}_2 = \text{CaH}_2 + 3\text{N}_2$                                     | -66.09 | -19.39  | -     | exergonic  |
| Ca-R105 | $2/3\text{CaN}_6 + \text{H}_2 = 2/3\text{CaH}_3 + 2\text{N}_2$                               | -65.27 | -       | -     | -          |
| Ca-R106 | $1/2\text{CaN}_6 + \text{H}_2 = 1/2\text{Ca}(\text{H}_2\text{N})_2 + \text{N}_2$             | -41.89 | -       | -     | -          |
| Ca-R107 | $32\text{CaN}_6 + \text{H}_2 = 2\text{Ca}_{16}\text{HN}_8 + 88\text{N}_2$                    | -62.02 | -       | -     | -          |
| Ca-R108 | $4\text{CaN}_6 + \text{H}_2 = 2\text{Ca}_2\text{HN} + 11\text{N}_2$                          | -61.66 | -       | -     | -          |
| Ca-R109 | $16/3\text{CaN}_6 + \text{H}_2 = 2/3\text{Ca}_8\text{H}_3\text{N}_4 + 44/3\text{N}_2$        | -61.76 | -       | -     | -          |
| Ca-R110 | $2\text{CaN}_6 + \text{H}_2 = 2\text{CaHN} + 5\text{N}_2$                                    | -55.61 | -       | -     | -          |
| Ca-R111 | $1/9\text{CaN}_6 + \text{H}_2 = 1/9\text{Ca} + 2/3\text{NH}_3$                               | -67.71 | -13.09  | 367.6 | exergonic  |
| Ca-R112 | $1/10\text{CaN}_6 + \text{H}_2 = 1/10\text{CaH}_2 + 3/5\text{NH}_3$                          | -66.09 | -29.48  | 583.8 | exergonic  |
| Ca-R113 | $2/21\text{CaN}_6 + \text{H}_2 = 2/21\text{CaH}_3 + 4/7\text{NH}_3$                          | -65.27 | -       | -     | -          |
| Ca-R114 | $1/8\text{CaN}_6 + \text{H}_2 = 1/8\text{Ca}(\text{H}_2\text{N})_2 + 1/2\text{NH}_3$         | -41.89 | -       | -     | -          |
| Ca-R115 | $32/265\text{CaN}_6 + \text{H}_2 = 2/265\text{Ca}_{16}\text{HN}_8 + 176/265\text{NH}_3$      | -62.02 | -       | -     | -          |
| Ca-R116 | $2/17\text{CaN}_6 + \text{H}_2 = 1/17\text{Ca}_2\text{HN} + 11/17\text{NH}_3$                | -61.66 | -       | -     | -          |
| Ca-R117 | $16/135\text{CaN}_6 + \text{H}_2 = 2/135\text{Ca}_8\text{H}_3\text{N}_4 + 88/135\text{NH}_3$ | -61.76 | -       | -     | -          |
| Ca-R118 | $1/8\text{CaN}_6 + \text{H}_2 = 1/8\text{CaHN} + 5/8\text{NH}_3$                             | -55.61 | -       | -     | -          |
| Ca-R119 | $11/87\text{CaN}_6 + \text{H}_2 = 1/87\text{Ca}_{11}\text{N}_8 + 2/3\text{NH}_3$             | -59.5  | -       | -     | -          |
| Ca-R120 | $4/33\text{CaN}_6 + \text{H}_2 = 2/33\text{Ca}_2\text{N} + 2/3\text{NH}_3$                   | -62.07 | -27.24  | 783   | exergonic  |
| Ca-R121 | $1/8\text{CaN}_6 + \text{H}_2 = 1/24\text{Ca}_3\text{N}_2 + 2/3\text{NH}_3$                  | -60.19 | -28.86  | 767.3 | exergonic  |
| Ca-R122 | $2/15\text{CaN}_6 + \text{H}_2 = 2/15\text{CaN} + 2/3\text{NH}_3$                            | -56.43 | -       | -     | -          |
| Ca-R123 | $1/6\text{CaN}_6 + \text{H}_2 = 1/6\text{CaN}_2 + 2/3\text{NH}_3$                            | -45.14 | -35.17  | -     | exergonic  |
| Ca-R124 | $11/4\text{Ca} + \text{N}_2 = 1/4\text{Ca}_{11}\text{N}_8$                                   | 25.42  | -       | -     | -          |
| Ca-R125 | $4\text{Ca} + \text{N}_2 = 2\text{Ca}_2\text{N}$                                             | 17.47  | -519.68 | -     | exergonic  |
| Ca-R126 | $3\text{Ca} + \text{N}_2 = \text{Ca}_3\text{N}_2$                                            | 23.3   | -431    | -     | exergonic  |
| Ca-R127 | $2\text{Ca} + \text{N}_2 = 2\text{CaN}$                                                      | 34.95  | -       | -     | -          |
| Ca-R128 | $\text{Ca} + \text{N}_2 = \text{CaN}_2$                                                      | 69.9   | -185.03 | -     | exergonic  |
| Ca-R129 | $1/3\text{Ca} + \text{N}_2 = 1/3\text{CaN}_6$                                                | 209.7  | -52.53  | 78.6  | exergonic  |
| Ca-R130 | $1/2\text{Ca}(\text{H}_2\text{N})_2 + \text{N}_2 = 1/2\text{CaN}_6 + \text{H}_2$             | 72.09  | -       | -     | -          |
| Ca-R131 | $33\text{Ca}(\text{H}_2\text{N})_2 + \text{N}_2 = 3\text{Ca}_{11}\text{N}_8 + 44\text{NH}_3$ | -30.31 | -       | -     | -          |

|         |                                                                                                      |        |         |       |            |
|---------|------------------------------------------------------------------------------------------------------|--------|---------|-------|------------|
| Ca-R132 | $6\text{Ca}(\text{H}_2\text{N})_2 + \text{N}_2 = 6\text{CaN} + 8\text{NH}_3$                         | -25.01 | -       | -     | -          |
| Ca-R133 | $3/2\text{Ca}(\text{H}_2\text{N})_2 + \text{N}_2 = 3/2\text{CaN}_2 + 2\text{NH}_3$                   | -5.59  | -       | -     | -          |
| Ca-R134 | $3/8\text{Ca}(\text{H}_2\text{N})_2 + \text{N}_2 = 3/8\text{CaN}_6 + 1/2\text{NH}_3$                 | 72.09  | -       | -     | -          |
| Ca-R135 | $2/3\text{Ca}_11\text{N}_8 + \text{N}_2 = 22/3\text{CaN}$                                            | 7.6    | -       | -     | -          |
| Ca-R136 | $1/7\text{Ca}_11\text{N}_8 + \text{N}_2 = 11/7\text{CaN}_2$                                          | 35.47  | -       | -     | -          |
| Ca-R137 | $1/29\text{Ca}_11\text{N}_8 + \text{N}_2 = 11/29\text{CaN}_6$                                        | 146.93 | -       | -     | -          |
| Ca-R138 | $11/20\text{Ca}_16\text{HN}_8 + \text{N}_2 = 4/5\text{Ca}_11\text{N}_8 + 11/40\text{H}_2$            | 6.62   | -       | -     | -          |
| Ca-R139 | $3/4\text{Ca}_16\text{HN}_8 + \text{N}_2 = 4\text{Ca}_3\text{N}_2 + 3/8\text{H}_2$                   | 4.82   | -       | -     | -          |
| Ca-R140 | $1/4\text{Ca}_16\text{HN}_8 + \text{N}_2 = 4\text{CaN} + 1/8\text{H}_2$                              | 14.72  | -       | -     | -          |
| Ca-R141 | $1/12\text{Ca}_16\text{HN}_8 + \text{N}_2 = 4/3\text{CaN}_2 + 1/24\text{H}_2$                        | 44.43  | -       | -     | -          |
| Ca-R142 | $1/44\text{Ca}_16\text{HN}_8 + \text{N}_2 = 4/11\text{CaN}_6 + 1/88\text{H}_2$                       | 163.28 | -       | -     | -          |
| Ca-R143 | $66/131\text{Ca}_16\text{HN}_8 + \text{N}_2 = 96/131\text{Ca}_11\text{N}_8 + 22/131\text{NH}_3$      | 6.62   | -       | -     | -          |
| Ca-R144 | $6\text{Ca}_16\text{HN}_8 + \text{N}_2 = 48\text{Ca}_2\text{N} + 2\text{NH}_3$                       | -0.13  | -       | -     | -          |
| Ca-R145 | $2/3\text{Ca}_16\text{HN}_8 + \text{N}_2 = 32/9\text{Ca}_3\text{N}_2 + 2/9\text{NH}_3$               | 4.82   | -       | -     | -          |
| Ca-R146 | $6/25\text{Ca}_16\text{HN}_8 + \text{N}_2 = 96/25\text{CaN} + 2/25\text{NH}_3$                       | 14.72  | -       | -     | -          |
| Ca-R147 | $6/73\text{Ca}_16\text{HN}_8 + \text{N}_2 = 96/73\text{CaN}_2 + 2/73\text{NH}_3$                     | 44.43  | -       | -     | -          |
| Ca-R148 | $6/265\text{Ca}_16\text{HN}_8 + \text{N}_2 = 96/265\text{CaN}_6 + 2/265\text{NH}_3$                  | 163.28 | -       | -     | -          |
| Ca-R149 | $22/5\text{Ca}_2\text{HN} + \text{N}_2 = 4/5\text{Ca}_11\text{N}_8 + 11/5\text{H}_2$                 | 5.63   | -       | -     | -          |
| Ca-R150 | $6\text{Ca}_2\text{HN} + \text{N}_2 = 4\text{Ca}_3\text{N}_2 + 3\text{H}_2$                          | 3.85   | -       | -     | -          |
| Ca-R151 | $2\text{Ca}_2\text{HN} + \text{N}_2 = 4\text{CaN} + \text{H}_2$                                      | 13.66  | -       | -     | -          |
| Ca-R152 | $2/3\text{Ca}_2\text{HN} + \text{N}_2 = 4/3\text{CaN}_2 + 1/3\text{H}_2$                             | 43.09  | -       | -     | -          |
| Ca-R153 | $2/11\text{Ca}_2\text{HN} + \text{N}_2 = 4/11\text{CaN}_6 + 1/11\text{H}_2$                          | 160.84 | -       | -     | -          |
| Ca-R154 | $48/7\text{Ca}_2\text{HN} + \text{N}_2 = 6/7\text{Ca}_16\text{HN}_8 + 2\text{NH}_3$                  | -0.93  | -       | -     | -          |
| Ca-R155 | $24\text{Ca}_2\text{HN} + \text{N}_2 = 6\text{Ca}_8\text{H}_3\text{N}_4 + 2\text{NH}_3$              | -0.26  | -       | -     | -          |
| Ca-R156 | $33/13\text{Ca}_2\text{HN} + \text{N}_2 = 6/13\text{Ca}_11\text{N}_8 + 11/13\text{NH}_3$             | 5.63   | -       | -     | -          |
| Ca-R157 | $6\text{Ca}_2\text{HN} + \text{N}_2 = 6\text{Ca}_2\text{N} + 2\text{NH}_3$                           | -1.06  | -       | -     | -          |
| Ca-R158 | $3\text{Ca}_2\text{HN} + \text{N}_2 = 2\text{Ca}_3\text{N}_2 + \text{NH}_3$                          | 3.85   | -       | -     | -          |
| Ca-R159 | $3/2\text{Ca}_2\text{HN} + \text{N}_2 = 3\text{CaN} + 1/2\text{NH}_3$                                | 13.66  | -       | -     | -          |
| Ca-R160 | $3/5\text{Ca}_2\text{HN} + \text{N}_2 = 6/5\text{CaN}_2 + 1/5\text{NH}_3$                            | 43.09  | -       | -     | -          |
| Ca-R161 | $3/17\text{Ca}_2\text{HN} + \text{N}_2 = 6/17\text{CaN}_6 + 1/17\text{NH}_3$                         | 160.84 | -       | -     | -          |
| Ca-R162 | $22/5\text{Ca}_2\text{N} + \text{N}_2 = 4/5\text{Ca}_11\text{N}_8$                                   | 6.76   | -       | -     | -          |
| Ca-R163 | $6\text{Ca}_2\text{N} + \text{N}_2 = 4\text{Ca}_3\text{N}_2$                                         | 4.96   | -164.95 | 177.7 | exergonic  |
| Ca-R164 | $2\text{Ca}_2\text{N} + \text{N}_2 = 4\text{CaN}$                                                    | 14.88  | -       | -     | -          |
| Ca-R165 | $2/3\text{Ca}_2\text{N} + \text{N}_2 = 4/3\text{CaN}_2$                                              | 44.63  | -73.48  | 154.4 | exergonic  |
| Ca-R166 | $2/11\text{Ca}_2\text{N} + \text{N}_2 = 4/11\text{CaN}_6$                                            | 163.63 | -10.06  | -     | endergonic |
| Ca-R167 | $11\text{Ca}_3\text{N}_2 + \text{N}_2 = 3\text{Ca}_11\text{N}_8$                                     | 1.72   | -       | -     | -          |
| Ca-R168 | $2\text{Ca}_3\text{N}_2 + \text{N}_2 = 6\text{CaN}$                                                  | 9.45   | -       | -     | -          |
| Ca-R169 | $1/2\text{Ca}_3\text{N}_2 + \text{N}_2 = 3/2\text{CaN}_2$                                            | 37.79  | -62.05  | 147.1 | exergonic  |
| Ca-R170 | $1/8\text{Ca}_3\text{N}_2 + \text{N}_2 = 3/8\text{CaN}_6$                                            | 151.17 | -5.22   | -     | endergonic |
| Ca-R171 | $11/10\text{Ca}_8\text{H}_3\text{N}_4 + \text{N}_2 = 4/5\text{Ca}_11\text{N}_8 + 33/20\text{H}_2$    | 5.91   | -       | -     | -          |
| Ca-R172 | $3/2\text{Ca}_8\text{H}_3\text{N}_4 + \text{N}_2 = 4\text{Ca}_3\text{N}_2 + 9/4\text{H}_2$           | 4.12   | -       | -     | -          |
| Ca-R173 | $1/2\text{Ca}_8\text{H}_3\text{N}_4 + \text{N}_2 = 4\text{CaN} + 3/4\text{H}_2$                      | 13.96  | -       | -     | -          |
| Ca-R174 | $1/6\text{Ca}_8\text{H}_3\text{N}_4 + \text{N}_2 = 4/3\text{CaN}_2 + 1/4\text{H}_2$                  | 43.47  | -       | -     | -          |
| Ca-R175 | $1/22\text{Ca}_8\text{H}_3\text{N}_4 + \text{N}_2 = 4/11\text{CaN}_6 + 3/44\text{H}_2$               | 161.53 | -       | -     | -          |
| Ca-R176 | $12/5\text{Ca}_8\text{H}_3\text{N}_4 + \text{N}_2 = 6/5\text{Ca}_16\text{HN}_8 + 2\text{NH}_3$       | -0.66  | -       | -     | -          |
| Ca-R177 | $22/31\text{Ca}_8\text{H}_3\text{N}_4 + \text{N}_2 = 16/31\text{Ca}_11\text{N}_8 + 22/31\text{NH}_3$ | 5.91   | -       | -     | -          |
| Ca-R178 | $2\text{Ca}_8\text{H}_3\text{N}_4 + \text{N}_2 = 8\text{Ca}_2\text{N} + 2\text{NH}_3$                | -0.8   | -       | -     | -          |
| Ca-R179 | $6/7\text{Ca}_8\text{H}_3\text{N}_4 + \text{N}_2 = 16/7\text{Ca}_3\text{N}_2 + 6/7\text{NH}_3$       | 4.12   | -       | -     | -          |
| Ca-R180 | $2/5\text{Ca}_8\text{H}_3\text{N}_4 + \text{N}_2 = 16/5\text{CaN} + 2/5\text{NH}_3$                  | 13.96  | -       | -     | -          |

|         |                                                                                           |        |        |       |            |
|---------|-------------------------------------------------------------------------------------------|--------|--------|-------|------------|
| Ca-R181 | $2/13\text{Ca}_8\text{H}_3\text{N}_4 + \text{N}_2 = 16/13\text{CaN}_2 + 2/13\text{NH}_3$  | 43.47  | -      | -     | -          |
| Ca-R182 | $2/45\text{Ca}_8\text{H}_3\text{N}_4 + \text{N}_2 = 16/45\text{CaN}_6 + 2/45\text{NH}_3$  | 161.53 | -      | -     | -          |
| Ca-R183 | $4\text{CaH}_2 + \text{N}_2 = 1/4\text{Ca}_{16}\text{HN}_8 + 31/8\text{H}_2$              | 12     | -      | -     | -          |
| Ca-R184 | $4\text{CaH}_2 + \text{N}_2 = 2\text{Ca}_2\text{HN} + 3\text{H}_2$                        | 13.05  | -      | -     | -          |
| Ca-R185 | $4\text{CaH}_2 + \text{N}_2 = 1/2\text{Ca}_8\text{H}_3\text{N}_4 + 13/4\text{H}_2$        | 12.75  | -      | -     | -          |
| Ca-R186 | $2\text{CaH}_2 + \text{N}_2 = 2\text{CaHN} + \text{H}_2$                                  | 30.88  | -      | -     | -          |
| Ca-R187 | $11/4\text{CaH}_2 + \text{N}_2 = 1/4\text{Ca}_{11}\text{N}_8 + 11/4\text{H}_2$            | 19.41  | -      | -     | -          |
| Ca-R188 | $4\text{CaH}_2 + \text{N}_2 = 2\text{Ca}_2\text{N} + 4\text{H}_2$                         | 11.85  | 188.24 | 235.2 | exergonic  |
| Ca-R189 | $3\text{CaH}_2 + \text{N}_2 = \text{Ca}_3\text{N}_2 + 3\text{H}_2$                        | 17.39  | 99.94  | 259.7 | exergonic  |
| Ca-R190 | $2\text{CaH}_2 + \text{N}_2 = 2\text{CaN} + 2\text{H}_2$                                  | 28.49  | -      | -     | -          |
| Ca-R191 | $\text{CaH}_2 + \text{N}_2 = \text{CaN}_2 + \text{H}_2$                                   | 61.76  | -8.05  | -     | endergonic |
| Ca-R192 | $1/3\text{CaH}_2 + \text{N}_2 = 1/3\text{CaN}_6 + 1/3\text{H}_2$                          | 194.86 | 6.46   | -     | endergonic |
| Ca-R193 | $3\text{CaH}_2 + \text{N}_2 = 3\text{Ca} + 2\text{NH}_3$                                  | -4.79  | 439.15 | -     | endergonic |
| Ca-R194 | $96/55\text{CaH}_2 + \text{N}_2 = 6/55\text{Ca}_{16}\text{HN}_8 + 62/55\text{NH}_3$       | 12     | -      | -     | -          |
| Ca-R195 | $2\text{CaH}_2 + \text{N}_2 = \text{Ca}_2\text{HN} + \text{NH}_3$                         | 13.05  | -      | -     | -          |
| Ca-R196 | $48/25\text{CaH}_2 + \text{N}_2 = 6/25\text{Ca}_8\text{H}_3\text{N}_4 + 26/25\text{NH}_3$ | 12.75  | -      | -     | -          |
| Ca-R197 | $3/2\text{CaH}_2 + \text{N}_2 = 3/2\text{CaHN} + 1/2\text{NH}_3$                          | 30.88  | -      | -     | -          |
| Ca-R198 | $33/23\text{CaH}_2 + \text{N}_2 = 3/23\text{Ca}_{11}\text{N}_8 + 22/23\text{NH}_3$        | 19.41  | -      | -     | -          |
| Ca-R199 | $12/7\text{CaH}_2 + \text{N}_2 = 6/7\text{Ca}_2\text{N} + 8/7\text{NH}_3$                 | 11.85  | 28.22  | 389.3 | exergonic  |
| Ca-R200 | $3/2\text{CaH}_2 + \text{N}_2 = 1/2\text{Ca}_3\text{N}_2 + \text{NH}_3$                   | 17.39  | 4.08   | -     | endergonic |
| Ca-R201 | $6/5\text{CaH}_2 + \text{N}_2 = 6/5\text{CaN} + 4/5\text{NH}_3$                           | 28.49  | -      | -     | -          |
| Ca-R202 | $3/4\text{CaH}_2 + \text{N}_2 = 3/4\text{CaN}_2 + 1/2\text{NH}_3$                         | 61.76  | -28.99 | 97.1  | exergonic  |
| Ca-R203 | $3/10\text{CaH}_2 + \text{N}_2 = 3/10\text{CaN}_6 + 1/5\text{NH}_3$                       | 194.86 | -3.36  | -     | endergonic |
| Ca-R204 | $4\text{CaH}_3 + \text{N}_2 = 1/4\text{Ca}_{16}\text{HN}_8 + 47/8\text{H}_2$              | 9.38   | -      | -     | -          |
| Ca-R205 | $4\text{CaH}_3 + \text{N}_2 = 2\text{Ca}_2\text{HN} + 5\text{H}_2$                        | 10.4   | -      | -     | -          |
| Ca-R206 | $4\text{CaH}_3 + \text{N}_2 = 1/2\text{Ca}_8\text{H}_3\text{N}_4 + 21/4\text{H}_2$        | 10.11  | -      | -     | -          |
| Ca-R207 | $2\text{CaH}_3 + \text{N}_2 = 2\text{CaHN} + 2\text{H}_2$                                 | 27.82  | -      | -     | -          |
| Ca-R208 | $11/4\text{CaH}_3 + \text{N}_2 = 1/4\text{Ca}_{11}\text{N}_8 + 33/8\text{H}_2$            | 16.62  | -      | -     | -          |
| Ca-R209 | $4\text{CaH}_3 + \text{N}_2 = 2\text{Ca}_2\text{N} + 6\text{H}_2$                         | 9.23   | -      | -     | -          |
| Ca-R210 | $3\text{CaH}_3 + \text{N}_2 = \text{Ca}_3\text{N}_2 + 9/2\text{H}_2$                      | 14.65  | -      | -     | -          |
| Ca-R211 | $2\text{CaH}_3 + \text{N}_2 = 2\text{CaN} + 3\text{H}_2$                                  | 25.48  | -      | -     | -          |
| Ca-R212 | $\text{CaH}_3 + \text{N}_2 = \text{CaN}_2 + 3/2\text{H}_2$                                | 57.98  | -      | -     | -          |
| Ca-R213 | $1/3\text{CaH}_3 + \text{N}_2 = 1/3\text{CaN}_6 + 1/2\text{H}_2$                          | 187.97 | -      | -     | -          |
| Ca-R214 | $2\text{CaH}_3 + \text{N}_2 = 2\text{Ca} + 2\text{NH}_3$                                  | -7.02  | -      | -     | -          |
| Ca-R215 | $6\text{CaH}_3 + \text{N}_2 = 6\text{CaH}_2 + 2\text{NH}_3$                               | -2.34  | -      | -     | -          |
| Ca-R216 | $96/71\text{CaH}_3 + \text{N}_2 = 6/71\text{Ca}_{16}\text{HN}_8 + 94/71\text{NH}_3$       | 9.38   | -      | -     | -          |
| Ca-R217 | $3/2\text{CaH}_3 + \text{N}_2 = 3/4\text{Ca}_2\text{HN} + 5/4\text{NH}_3$                 | 10.4   | -      | -     | -          |
| Ca-R218 | $16/11\text{CaH}_3 + \text{N}_2 = 2/11\text{Ca}_8\text{H}_3\text{N}_4 + 14/11\text{NH}_3$ | 10.11  | -      | -     | -          |
| Ca-R219 | $6/5\text{CaH}_3 + \text{N}_2 = 6/5\text{CaHN} + 4/5\text{NH}_3$                          | 27.82  | -      | -     | -          |
| Ca-R220 | $22/19\text{CaH}_3 + \text{N}_2 = 2/19\text{Ca}_{11}\text{N}_8 + 22/19\text{NH}_3$        | 16.62  | -      | -     | -          |
| Ca-R221 | $4/3\text{CaH}_3 + \text{N}_2 = 2/3\text{Ca}_2\text{N} + 4/3\text{NH}_3$                  | 9.23   | -      | -     | -          |
| Ca-R222 | $6/5\text{CaH}_3 + \text{N}_2 = 2/5\text{Ca}_3\text{N}_2 + 6/5\text{NH}_3$                | 14.65  | -      | -     | -          |
| Ca-R223 | $\text{CaH}_3 + \text{N}_2 = \text{CaN} + \text{NH}_3$                                    | 25.48  | -      | -     | -          |
| Ca-R224 | $2/3\text{CaH}_3 + \text{N}_2 = 2/3\text{CaN}_2 + 2/3\text{NH}_3$                         | 57.98  | -      | -     | -          |
| Ca-R225 | $2/7\text{CaH}_3 + \text{N}_2 = 2/7\text{CaN}_6 + 2/7\text{NH}_3$                         | 187.97 | -      | -     | -          |
| Ca-R226 | $2\text{CaHN} + \text{N}_2 = 2\text{CaN}_2 + \text{H}_2$                                  | 23.59  | -      | -     | -          |
| Ca-R227 | $2/5\text{CaHN} + \text{N}_2 = 2/5\text{CaN}_6 + 1/5\text{H}_2$                           | 125.29 | -      | -     | -          |
| Ca-R228 | $33\text{CaHN} + \text{N}_2 = 3\text{Ca}_{11}\text{N}_8 + 11\text{NH}_3$                  | -8.76  | -      | -     | -          |
| Ca-R229 | $6\text{CaHN} + \text{N}_2 = 6\text{CaN} + 2\text{NH}_3$                                  | -1.83  | -      | -     | -          |



|         |                                                                  |        |       |   |            |
|---------|------------------------------------------------------------------|--------|-------|---|------------|
| Ca-R230 | $3/2\text{CaHN} + \text{N}_2 = 3/2\text{CaN}_2 + 1/2\text{NH}_3$ | 23.59  | -     | - | -          |
| Ca-R231 | $3/8\text{CaHN} + \text{N}_2 = 3/8\text{CaN}_6 + 1/8\text{NH}_3$ | 125.29 | -     | - | -          |
| Ca-R232 | $2\text{CaN} + \text{N}_2 = 2\text{CaN}_2$                       | 25.9   | -     | - | -          |
| Ca-R233 | $2/5\text{CaN} + \text{N}_2 = 2/5\text{CaN}_6$                   | 129.49 | -     | - | -          |
| Ca-R234 | $1/2\text{CaN}_2 + \text{N}_2 = 1/2\text{CaN}_6$                 | 82.28  | 13.72 | - | endergonic |

Table S16: The Co-based system

| ID      | Reaction                                                                           | dm_stoich [%] | h298 [kJ/mol] | T_eq [°C] | Type       |
|---------|------------------------------------------------------------------------------------|---------------|---------------|-----------|------------|
| Co-R001 | $6\text{Co} + \text{H}_2 = 2\text{Co}_3\text{H}$                                   | 0.57          | -16.75        | -         | endergonic |
| Co-R002 | $8\text{Co} + \text{H}_2 = 2\text{Co}_4\text{H}$                                   | 0.43          | -             | -         | -          |
| Co-R003 | $2\text{Co} + \text{H}_2 = 2\text{CoH}$                                            | 1.71          | -             | -         | -          |
| Co-R004 | $2/3\text{Co} + \text{H}_2 = 2/3\text{CoH}_3$                                      | 5.13          | -             | -         | -          |
| Co-R005 | $3\text{Co}_2\text{N} + \text{H}_2 = 2\text{Co}_3\text{H} + 3/2\text{N}_2$         | -10.11        | -171.23       | -         | exergonic  |
| Co-R006 | $4\text{Co}_2\text{N} + \text{H}_2 = 2\text{Co}_4\text{H} + 2\text{N}_2$           | -10.24        | -             | -         | -          |
| Co-R007 | $\text{Co}_2\text{N} + \text{H}_2 = 2\text{CoH} + 1/2\text{N}_2$                   | -9.09         | -             | -         | -          |
| Co-R008 | $1/3\text{Co}_2\text{N} + \text{H}_2 = 2/3\text{CoH}_3 + 1/6\text{N}_2$            | -6.04         | -             | -         | -          |
| Co-R009 | $2/3\text{Co}_2\text{N} + \text{H}_2 = 4/3\text{Co} + 2/3\text{NH}_3$              | -10.62        | -64.93        | -         | exergonic  |
| Co-R010 | $6/11\text{Co}_2\text{N} + \text{H}_2 = 4/11\text{Co}_3\text{H} + 6/11\text{NH}_3$ | -10.11        | -56.17        | -         | exergonic  |
| Co-R011 | $4/7\text{Co}_2\text{N} + \text{H}_2 = 2/7\text{Co}_4\text{H} + 4/7\text{NH}_3$    | -10.24        | -             | -         | -          |
| Co-R012 | $2/5\text{Co}_2\text{N} + \text{H}_2 = 4/5\text{CoH} + 2/5\text{NH}_3$             | -9.09         | -             | -         | -          |
| Co-R013 | $2/9\text{Co}_2\text{N} + \text{H}_2 = 4/9\text{CoH}_3 + 2/9\text{NH}_3$           | -6.04         | -             | -         | -          |
| Co-R014 | $2\text{Co}_2\text{N} + \text{H}_2 = 4/3\text{Co}_3\text{N} + 2/3\text{NH}_3$      | -3.54         | -122.43       | -         | exergonic  |
| Co-R015 | $4/3\text{Co}_2\text{N} + \text{H}_2 = 2/3\text{Co}_4\text{N} + 2/3\text{NH}_3$    | -5.31         | -             | -         | -          |
| Co-R016 | $\text{Co}_3\text{H} + \text{H}_2 = 3\text{CoH}$                                   | 1.13          | -             | -         | -          |
| Co-R017 | $1/4\text{Co}_3\text{H} + \text{H}_2 = 3/4\text{CoH}_3$                            | 4.54          | -             | -         | -          |
| Co-R018 | $2\text{Co}_3\text{N} + \text{H}_2 = 2\text{Co}_3\text{H} + \text{N}_2$            | -6.81         | -33.49        | -         | exergonic  |
| Co-R019 | $8/3\text{Co}_3\text{N} + \text{H}_2 = 2\text{Co}_4\text{H} + 4/3\text{N}_2$       | -6.94         | -             | -         | -          |
| Co-R020 | $2/3\text{Co}_3\text{N} + \text{H}_2 = 2\text{CoH} + 1/3\text{N}_2$                | -5.76         | -             | -         | -          |
| Co-R021 | $2/9\text{Co}_3\text{N} + \text{H}_2 = 2/3\text{CoH}_3 + 1/9\text{N}_2$            | -2.59         | -             | -         | -          |
| Co-R022 | $2/3\text{Co}_3\text{N} + \text{H}_2 = 2\text{Co} + 2/3\text{NH}_3$                | -7.34         | -36.18        | -         | exergonic  |
| Co-R023 | $1/2\text{Co}_3\text{N} + \text{H}_2 = 1/2\text{Co}_3\text{H} + 1/2\text{NH}_3$    | -6.81         | -31.32        | 352.1     | exergonic  |
| Co-R024 | $8/15\text{Co}_3\text{N} + \text{H}_2 = 2/5\text{Co}_4\text{H} + 8/15\text{NH}_3$  | -6.94         | -             | -         | -          |
| Co-R025 | $1/3\text{Co}_3\text{N} + \text{H}_2 = \text{CoH} + 1/3\text{NH}_3$                | -5.76         | -             | -         | -          |
| Co-R026 | $1/6\text{Co}_3\text{N} + \text{H}_2 = 1/2\text{CoH}_3 + 1/6\text{NH}_3$           | -2.59         | -             | -         | -          |
| Co-R027 | $8/3\text{Co}_3\text{N} + \text{H}_2 = 2\text{Co}_4\text{N} + 2/3\text{NH}_3$      | -1.84         | -             | -         | -          |
| Co-R028 | $6\text{Co}_4\text{H} + \text{H}_2 = 8\text{Co}_3\text{H}$                         | 0.14          | -             | -         | -          |
| Co-R029 | $2/3\text{Co}_4\text{H} + \text{H}_2 = 8/3\text{CoH}$                              | 1.28          | -             | -         | -          |
| Co-R030 | $2/11\text{Co}_4\text{H} + \text{H}_2 = 8/11\text{CoH}_3$                          | 4.68          | -             | -         | -          |
| Co-R031 | $3/2\text{Co}_4\text{N} + \text{H}_2 = 2\text{Co}_3\text{H} + 3/4\text{N}_2$       | -5.07         | -             | -         | -          |
| Co-R032 | $2\text{Co}_4\text{N} + \text{H}_2 = 2\text{Co}_4\text{H} + \text{N}_2$            | -5.21         | -             | -         | -          |
| Co-R033 | $1/2\text{Co}_4\text{N} + \text{H}_2 = 2\text{CoH} + 1/4\text{N}_2$                | -3.99         | -             | -         | -          |
| Co-R034 | $1/6\text{Co}_4\text{N} + \text{H}_2 = 2/3\text{CoH}_3 + 1/12\text{N}_2$           | -0.77         | -             | -         | -          |
| Co-R035 | $2/3\text{Co}_4\text{N} + \text{H}_2 = 8/3\text{Co} + 2/3\text{NH}_3$              | -5.61         | -             | -         | -          |
| Co-R036 | $6/13\text{Co}_4\text{N} + \text{H}_2 = 8/13\text{Co}_3\text{H} + 6/13\text{NH}_3$ | -5.07         | -             | -         | -          |
| Co-R037 | $1/2\text{Co}_4\text{N} + \text{H}_2 = 1/2\text{Co}_4\text{H} + 1/2\text{NH}_3$    | -5.21         | -             | -         | -          |
| Co-R038 | $2/7\text{Co}_4\text{N} + \text{H}_2 = 8/7\text{CoH} + 2/7\text{NH}_3$             | -3.99         | -             | -         | -          |
| Co-R039 | $2/15\text{Co}_4\text{N} + \text{H}_2 = 8/15\text{CoH}_3 + 2/15\text{NH}_3$        | -0.77         | -             | -         | -          |
| Co-R040 | $\text{CoH} + \text{H}_2 = \text{CoH}_3$                                           | 3.36          | -             | -         | -          |

|         |                                                                                    |        |         |       |            |
|---------|------------------------------------------------------------------------------------|--------|---------|-------|------------|
| Co-R041 | $6\text{CoN} + \text{H}_2 = 2\text{Co}_3\text{H} + 3\text{N}_2$                    | -18.74 | -135.88 | -     | exergonic  |
| Co-R042 | $8\text{CoN} + \text{H}_2 = 2\text{Co}_4\text{H} + 4\text{N}_2$                    | -18.86 | -       | -     | -          |
| Co-R043 | $2\text{CoN} + \text{H}_2 = 2\text{CoH} + \text{N}_2$                              | -17.82 | -       | -     | -          |
| Co-R044 | $2/3\text{CoN} + \text{H}_2 = 2/3\text{CoH}_3 + 1/3\text{N}_2$                     | -15.06 | -       | -     | -          |
| Co-R045 | $2/3\text{CoN} + \text{H}_2 = 2/3\text{Co} + 2/3\text{NH}_3$                       | -19.2  | -43.83  | -     | exergonic  |
| Co-R046 | $3/5\text{CoN} + \text{H}_2 = 1/5\text{Co}_3\text{H} + 3/5\text{NH}_3$             | -18.74 | -41.13  | 798.6 | exergonic  |
| Co-R047 | $8/13\text{CoN} + \text{H}_2 = 2/13\text{Co}_4\text{H} + 8/13\text{NH}_3$          | -18.86 | -       | -     | -          |
| Co-R048 | $1/2\text{CoN} + \text{H}_2 = 1/2\text{CoH} + 1/2\text{NH}_3$                      | -17.82 | -       | -     | -          |
| Co-R049 | $1/3\text{CoN} + \text{H}_2 = 1/3\text{CoH}_3 + 1/3\text{NH}_3$                    | -15.06 | -       | -     | -          |
| Co-R050 | $4/3\text{CoN} + \text{H}_2 = 2/3\text{Co}_2\text{N} + 2/3\text{NH}_3$             | -9.6   | -22.74  | 422.8 | exergonic  |
| Co-R051 | $\text{CoN} + \text{H}_2 = 1/3\text{Co}_3\text{N} + 2/3\text{NH}_3$                | -12.8  | -47.66  | -     | exergonic  |
| Co-R052 | $8/9\text{CoN} + \text{H}_2 = 2/9\text{Co}_4\text{N} + 2/3\text{NH}_3$             | -14.4  | -       | -     | -          |
| Co-R053 | $6\text{CoN}_{12} + \text{H}_2 = 2\text{Co}_3\text{H} + 36\text{N}_2$              | -73.89 | -       | -     | -          |
| Co-R054 | $8\text{CoN}_{12} + \text{H}_2 = 2\text{Co}_4\text{H} + 48\text{N}_2$              | -73.93 | -       | -     | -          |
| Co-R055 | $2\text{CoN}_{12} + \text{H}_2 = 2\text{CoH} + 12\text{N}_2$                       | -73.6  | -       | -     | -          |
| Co-R056 | $2/3\text{CoN}_{12} + \text{H}_2 = 2/3\text{CoH}_3 + 4\text{N}_2$                  | -72.71 | -       | -     | -          |
| Co-R057 | $1/18\text{CoN}_{12} + \text{H}_2 = 1/18\text{Co} + 2/3\text{NH}_3$                | -74.04 | -       | -     | -          |
| Co-R058 | $6/109\text{CoN}_{12} + \text{H}_2 = 2/109\text{Co}_3\text{H} + 72/109\text{NH}_3$ | -73.89 | -       | -     | -          |
| Co-R059 | $8/145\text{CoN}_{12} + \text{H}_2 = 2/145\text{Co}_4\text{H} + 96/145\text{NH}_3$ | -73.93 | -       | -     | -          |
| Co-R060 | $2/37\text{CoN}_{12} + \text{H}_2 = 2/37\text{CoH} + 24/37\text{NH}_3$             | -73.6  | -       | -     | -          |
| Co-R061 | $2/39\text{CoN}_{12} + \text{H}_2 = 2/39\text{CoH}_3 + 8/13\text{NH}_3$            | -72.71 | -       | -     | -          |
| Co-R062 | $4/69\text{CoN}_{12} + \text{H}_2 = 2/69\text{Co}_2\text{N} + 2/3\text{NH}_3$      | -70.96 | -       | -     | -          |
| Co-R063 | $2/35\text{CoN}_{12} + \text{H}_2 = 2/105\text{Co}_3\text{N} + 2/3\text{NH}_3$     | -71.98 | -       | -     | -          |
| Co-R064 | $8/141\text{CoN}_{12} + \text{H}_2 = 2/141\text{Co}_4\text{N} + 2/3\text{NH}_3$    | -72.5  | -       | -     | -          |
| Co-R065 | $2/33\text{CoN}_{12} + \text{H}_2 = 2/33\text{CoN} + 2/3\text{NH}_3$               | -67.87 | -       | -     | -          |
| Co-R066 | $2/27\text{CoN}_{12} + \text{H}_2 = 2/27\text{CoN}_3 + 2/3\text{NH}_3$             | -55.53 | -       | -     | -          |
| Co-R067 | $6\text{CoN}_3 + \text{H}_2 = 2\text{Co}_3\text{H} + 9\text{N}_2$                  | -41.29 | -       | -     | -          |
| Co-R068 | $8\text{CoN}_3 + \text{H}_2 = 2\text{Co}_4\text{H} + 12\text{N}_2$                 | -41.37 | -       | -     | -          |
| Co-R069 | $2\text{CoN}_3 + \text{H}_2 = 2\text{CoH} + 3\text{N}_2$                           | -40.63 | -       | -     | -          |
| Co-R070 | $2/3\text{CoN}_3 + \text{H}_2 = 2/3\text{CoH}_3 + \text{N}_2$                      | -38.63 | -       | -     | -          |
| Co-R071 | $2/9\text{CoN}_3 + \text{H}_2 = 2/9\text{Co} + 2/3\text{NH}_3$                     | -41.62 | -       | -     | -          |
| Co-R072 | $3/14\text{CoN}_3 + \text{H}_2 = 1/14\text{Co}_3\text{H} + 9/14\text{NH}_3$        | -41.29 | -       | -     | -          |
| Co-R073 | $8/37\text{CoN}_3 + \text{H}_2 = 2/37\text{Co}_4\text{H} + 24/37\text{NH}_3$       | -41.37 | -       | -     | -          |
| Co-R074 | $1/5\text{CoN}_3 + \text{H}_2 = 1/5\text{CoH} + 3/5\text{NH}_3$                    | -40.63 | -       | -     | -          |
| Co-R075 | $1/6\text{CoN}_3 + \text{H}_2 = 1/6\text{CoH}_3 + 1/2\text{NH}_3$                  | -38.63 | -       | -     | -          |
| Co-R076 | $4/15\text{CoN}_3 + \text{H}_2 = 2/15\text{Co}_2\text{N} + 2/3\text{NH}_3$         | -34.69 | -       | -     | -          |
| Co-R077 | $1/4\text{CoN}_3 + \text{H}_2 = 1/12\text{Co}_3\text{N} + 2/3\text{NH}_3$          | -37    | -       | -     | -          |
| Co-R078 | $8/33\text{CoN}_3 + \text{H}_2 = 2/33\text{Co}_4\text{N} + 2/3\text{NH}_3$         | -38.16 | -       | -     | -          |
| Co-R079 | $1/3\text{CoN}_3 + \text{H}_2 = 1/3\text{CoN} + 2/3\text{NH}_3$                    | -27.75 | -       | -     | -          |
| Co-R080 | $4\text{Co} + \text{N}_2 = 2\text{Co}_2\text{N}$                                   | 11.88  | 102.99  | -     | endergonic |
| Co-R081 | $6\text{Co} + \text{N}_2 = 2\text{Co}_3\text{N}$                                   | 7.92   | 16.74   | -     | endergonic |
| Co-R082 | $8\text{Co} + \text{N}_2 = 2\text{Co}_4\text{N}$                                   | 5.94   | -       | -     | -          |
| Co-R083 | $2\text{Co} + \text{N}_2 = 2\text{CoN}$                                            | 23.77  | 39.71   | -     | endergonic |
| Co-R084 | $1/6\text{Co} + \text{N}_2 = 1/6\text{CoN}_{12}$                                   | 285.21 | -       | -     | -          |
| Co-R085 | $2/3\text{Co} + \text{N}_2 = 2/3\text{CoN}_3$                                      | 71.3   | -       | -     | -          |
| Co-R086 | $2\text{Co}_2\text{N} + \text{N}_2 = 4\text{CoN}$                                  | 10.62  | -23.57  | -     | endergonic |
| Co-R087 | $2/23\text{Co}_2\text{N} + \text{N}_2 = 4/23\text{CoN}_{12}$                       | 244.3  | -       | -     | -          |
| Co-R088 | $2/5\text{Co}_2\text{N} + \text{N}_2 = 4/5\text{CoN}_3$                            | 53.11  | -       | -     | -          |
| Co-R089 | $4/3\text{Co}_3\text{H} + \text{N}_2 = 2\text{Co}_2\text{N} + 2/3\text{H}_2$       | 11.25  | 114.16  | -     | endergonic |

|         |                                                                                      |        |        |   |            |
|---------|--------------------------------------------------------------------------------------|--------|--------|---|------------|
| Co-R090 | $2\text{Co}_3\text{H} + \text{N}_2 = 2\text{Co}_3\text{N} + \text{H}_2$              | 7.31   | 33.49  | - | endergonic |
| Co-R091 | $8/3\text{Co}_3\text{H} + \text{N}_2 = 2\text{Co}_4\text{N} + 4/3\text{H}_2$         | 5.34   | -      | - | -          |
| Co-R092 | $2/3\text{Co}_3\text{H} + \text{N}_2 = 2\text{CoN} + 1/3\text{H}_2$                  | 23.07  | 45.29  | - | endergonic |
| Co-R093 | $1/18\text{Co}_3\text{H} + \text{N}_2 = 1/6\text{CoN}_{12} + 1/36\text{H}_2$         | 283.03 | -      | - | -          |
| Co-R094 | $2/9\text{Co}_3\text{H} + \text{N}_2 = 2/3\text{CoN}_3 + 1/9\text{H}_2$              | 70.33  | -      | - | -          |
| Co-R095 | $6\text{Co}_3\text{H} + \text{N}_2 = 18\text{Co} + 2\text{NH}_3$                     | -0.57  | -41.54 | - | exergonic  |
| Co-R096 | $24\text{Co}_3\text{H} + \text{N}_2 = 18\text{Co}_4\text{H} + 2\text{NH}_3$          | -0.14  | -      | - | -          |
| Co-R097 | $12/11\text{Co}_3\text{H} + \text{N}_2 = 18/11\text{Co}_2\text{N} + 4/11\text{NH}_3$ | 11.25  | 76.71  | - | endergonic |
| Co-R098 | $3/2\text{Co}_3\text{H} + \text{N}_2 = 3/2\text{Co}_3\text{N} + 1/2\text{NH}_3$      | 7.31   | 2.17   | - | endergonic |
| Co-R099 | $24/13\text{Co}_3\text{H} + \text{N}_2 = 18/13\text{Co}_4\text{N} + 8/13\text{NH}_3$ | 5.34   | -      | - | -          |
| Co-R100 | $3/5\text{Co}_3\text{H} + \text{N}_2 = 9/5\text{CoN} + 1/5\text{NH}_3$               | 23.07  | 31.59  | - | endergonic |
| Co-R101 | $6/109\text{Co}_3\text{H} + \text{N}_2 = 18/109\text{CoN}_{12} + 2/109\text{NH}_3$   | 283.03 | -      | - | -          |
| Co-R102 | $3/14\text{Co}_3\text{H} + \text{N}_2 = 9/14\text{CoN}_3 + 1/14\text{NH}_3$          | 70.33  | -      | - | -          |
| Co-R103 | $4\text{Co}_3\text{N} + \text{N}_2 = 6\text{Co}_2\text{N}$                           | 3.67   | 275.49 | - | endergonic |
| Co-R104 | $\text{Co}_3\text{N} + \text{N}_2 = 3\text{CoN}$                                     | 14.68  | 51.2   | - | endergonic |
| Co-R105 | $2/35\text{Co}_3\text{N} + \text{N}_2 = 6/35\text{CoN}_{12}$                         | 256.93 | -      | - | -          |
| Co-R106 | $1/4\text{Co}_3\text{N} + \text{N}_2 = 3/4\text{CoN}_3$                              | 58.73  | -      | - | -          |
| Co-R107 | $\text{Co}_4\text{H} + \text{N}_2 = 2\text{Co}_2\text{N} + 1/2\text{H}_2$            | 11.41  | -      | - | -          |
| Co-R108 | $3/2\text{Co}_4\text{H} + \text{N}_2 = 2\text{Co}_3\text{N} + 3/4\text{H}_2$         | 7.46   | -      | - | -          |
| Co-R109 | $2\text{Co}_4\text{H} + \text{N}_2 = 2\text{Co}_4\text{N} + \text{H}_2$              | 5.49   | -      | - | -          |
| Co-R110 | $1/2\text{Co}_4\text{H} + \text{N}_2 = 2\text{CoN} + 1/4\text{H}_2$                  | 23.24  | -      | - | -          |
| Co-R111 | $1/24\text{Co}_4\text{H} + \text{N}_2 = 1/6\text{CoN}_{12} + 1/48\text{H}_2$         | 283.57 | -      | - | -          |
| Co-R112 | $1/6\text{Co}_4\text{H} + \text{N}_2 = 2/3\text{CoN}_3 + 1/12\text{H}_2$             | 70.57  | -      | - | -          |
| Co-R113 | $6\text{Co}_4\text{H} + \text{N}_2 = 24\text{Co} + 2\text{NH}_3$                     | -0.43  | -      | - | -          |
| Co-R114 | $6/7\text{Co}_4\text{H} + \text{N}_2 = 12/7\text{Co}_2\text{N} + 2/7\text{NH}_3$     | 11.41  | -      | - | -          |
| Co-R115 | $6/5\text{Co}_4\text{H} + \text{N}_2 = 8/5\text{Co}_3\text{N} + 2/5\text{NH}_3$      | 7.46   | -      | - | -          |
| Co-R116 | $3/2\text{Co}_4\text{H} + \text{N}_2 = 3/2\text{Co}_4\text{N} + 1/2\text{NH}_3$      | 5.49   | -      | - | -          |
| Co-R117 | $6/13\text{Co}_4\text{H} + \text{N}_2 = 24/13\text{CoN} + 2/13\text{NH}_3$           | 23.24  | -      | - | -          |
| Co-R118 | $6/145\text{Co}_4\text{H} + \text{N}_2 = 24/145\text{CoN}_{12} + 2/145\text{NH}_3$   | 283.57 | -      | - | -          |
| Co-R119 | $6/37\text{Co}_4\text{H} + \text{N}_2 = 24/37\text{CoN}_3 + 2/37\text{NH}_3$         | 70.57  | -      | - | -          |
| Co-R120 | $2\text{Co}_4\text{N} + \text{N}_2 = 4\text{Co}_2\text{N}$                           | 5.61   | -      | - | -          |
| Co-R121 | $6\text{Co}_4\text{N} + \text{N}_2 = 8\text{Co}_3\text{N}$                           | 1.87   | -      | - | -          |
| Co-R122 | $2/3\text{Co}_4\text{N} + \text{N}_2 = 8/3\text{CoN}$                                | 16.83  | -      | - | -          |
| Co-R123 | $2/47\text{Co}_4\text{N} + \text{N}_2 = 8/47\text{CoN}_{12}$                         | 263.61 | -      | - | -          |
| Co-R124 | $2/11\text{Co}_4\text{N} + \text{N}_2 = 8/11\text{CoN}_3$                            | 61.7   | -      | - | -          |
| Co-R125 | $4\text{CoH} + \text{N}_2 = 2\text{Co}_2\text{N} + 2\text{H}_2$                      | 10     | -      | - | -          |
| Co-R126 | $6\text{CoH} + \text{N}_2 = 2\text{Co}_3\text{N} + 3\text{H}_2$                      | 6.11   | -      | - | -          |
| Co-R127 | $8\text{CoH} + \text{N}_2 = 2\text{Co}_4\text{N} + 4\text{H}_2$                      | 4.16   | -      | - | -          |
| Co-R128 | $2\text{CoH} + \text{N}_2 = 2\text{CoN} + \text{H}_2$                                | 21.69  | -      | - | -          |
| Co-R129 | $1/6\text{CoH} + \text{N}_2 = 1/6\text{CoN}_{12} + 1/12\text{H}_2$                   | 278.73 | -      | - | -          |
| Co-R130 | $2/3\text{CoH} + \text{N}_2 = 2/3\text{CoN}_3 + 1/3\text{H}_2$                       | 68.42  | -      | - | -          |
| Co-R131 | $6\text{CoH} + \text{N}_2 = 6\text{Co} + 2\text{NH}_3$                               | -1.68  | -      | - | -          |
| Co-R132 | $9\text{CoH} + \text{N}_2 = 3\text{Co}_3\text{H} + 2\text{NH}_3$                     | -1.12  | -      | - | -          |
| Co-R133 | $8\text{CoH} + \text{N}_2 = 2\text{Co}_4\text{H} + 2\text{NH}_3$                     | -1.26  | -      | - | -          |
| Co-R134 | $12/5\text{CoH} + \text{N}_2 = 6/5\text{Co}_2\text{N} + 4/5\text{NH}_3$              | 10     | -      | - | -          |
| Co-R135 | $3\text{CoH} + \text{N}_2 = \text{Co}_3\text{N} + \text{NH}_3$                       | 6.11   | -      | - | -          |
| Co-R136 | $24/7\text{CoH} + \text{N}_2 = 6/7\text{Co}_4\text{N} + 8/7\text{NH}_3$              | 4.16   | -      | - | -          |
| Co-R137 | $3/2\text{CoH} + \text{N}_2 = 3/2\text{CoN} + 1/2\text{NH}_3$                        | 21.69  | -      | - | -          |
| Co-R138 | $6/37\text{CoH} + \text{N}_2 = 6/37\text{CoN}_{12} + 2/37\text{NH}_3$                | 278.73 | -      | - | -          |

|         |                                                                           |        |   |   |   |
|---------|---------------------------------------------------------------------------|--------|---|---|---|
| Co-R139 | $3/5\text{CoH} + \text{N}_2 = 3/5\text{CoN}_3 + 1/5\text{NH}_3$           | 68.42  | - | - | - |
| Co-R140 | $4\text{CoH}_3 + \text{N}_2 = 2\text{Co}_2\text{N} + 6\text{H}_2$         | 6.42   | - | - | - |
| Co-R141 | $6\text{CoH}_3 + \text{N}_2 = 2\text{Co}_3\text{N} + 9\text{H}_2$         | 2.66   | - | - | - |
| Co-R142 | $8\text{CoH}_3 + \text{N}_2 = 2\text{Co}_4\text{N} + 12\text{H}_2$        | 0.77   | - | - | - |
| Co-R143 | $2\text{CoH}_3 + \text{N}_2 = 2\text{CoN} + 3\text{H}_2$                  | 17.73  | - | - | - |
| Co-R144 | $1/6\text{CoH}_3 + \text{N}_2 = 1/6\text{CoN}_{12} + 1/4\text{H}_2$       | 266.41 | - | - | - |
| Co-R145 | $2/3\text{CoH}_3 + \text{N}_2 = 2/3\text{CoN}_3 + \text{H}_2$             | 62.94  | - | - | - |
| Co-R146 | $2\text{CoH}_3 + \text{N}_2 = 2\text{Co} + 2\text{NH}_3$                  | -4.88  | - | - | - |
| Co-R147 | $9/4\text{CoH}_3 + \text{N}_2 = 3/4\text{Co}_3\text{H} + 2\text{NH}_3$    | -4.34  | - | - | - |
| Co-R148 | $24/11\text{CoH}_3 + \text{N}_2 = 6/11\text{Co}_4\text{H} + 2\text{NH}_3$ | -4.47  | - | - | - |
| Co-R149 | $3\text{CoH}_3 + \text{N}_2 = 3\text{CoH} + 2\text{NH}_3$                 | -3.25  | - | - | - |
| Co-R150 | $4/3\text{CoH}_3 + \text{N}_2 = 2/3\text{Co}_2\text{N} + 4/3\text{NH}_3$  | 6.42   | - | - | - |
| Co-R151 | $3/2\text{CoH}_3 + \text{N}_2 = 1/2\text{Co}_3\text{N} + 3/2\text{NH}_3$  | 2.66   | - | - | - |
| Co-R152 | $8/5\text{CoH}_3 + \text{N}_2 = 2/5\text{Co}_4\text{N} + 8/5\text{NH}_3$  | 0.77   | - | - | - |
| Co-R153 | $\text{CoH}_3 + \text{N}_2 = \text{CoN} + \text{NH}_3$                    | 17.73  | - | - | - |
| Co-R154 | $2/13\text{CoH}_3 + \text{N}_2 = 2/13\text{CoN}_{12} + 2/13\text{NH}_3$   | 266.41 | - | - | - |
| Co-R155 | $1/2\text{CoH}_3 + \text{N}_2 = 1/2\text{CoN}_3 + 1/2\text{NH}_3$         | 62.94  | - | - | - |
| Co-R156 | $2/11\text{CoN} + \text{N}_2 = 2/11\text{CoN}_{12}$                       | 211.24 | - | - | - |
| Co-R157 | $\text{CoN} + \text{N}_2 = \text{CoN}_3$                                  | 38.41  | - | - | - |
| Co-R158 | $2/9\text{CoN}_3 + \text{N}_2 = 2/9\text{CoN}_{12}$                       | 124.87 | - | - | - |

Table S17: The Cr-based system

| ID      | Reaction                                                                           | dm_stoich [%] | h298 [kJ/mol] | T_eq [°C] | Type       |
|---------|------------------------------------------------------------------------------------|---------------|---------------|-----------|------------|
| Cr-R001 | $6\text{Cr} + \text{H}_2 = 2\text{Cr}_3\text{H}$                                   | 0.65          | -             | -         | -          |
| Cr-R002 | $2\text{Cr} + \text{H}_2 = 2\text{CrH}$                                            | 1.94          | 64.04         | -         | endergonic |
| Cr-R003 | $\text{Cr} + \text{H}_2 = \text{CrH}_2$                                            | 3.88          | -             | -         | -          |
| Cr-R004 | $2/3\text{Cr} + \text{H}_2 = 2/3\text{CrH}_3$                                      | 5.82          | -             | -         | -          |
| Cr-R005 | $3\text{Cr}_2\text{N} + \text{H}_2 = 2\text{Cr}_3\text{H} + 3/2\text{N}_2$         | -11.3         | -             | -         | -          |
| Cr-R006 | $\text{Cr}_2\text{N} + \text{H}_2 = 2\text{CrH} + 1/2\text{N}_2$                   | -10.16        | 189.56        | -         | endergonic |
| Cr-R007 | $1/2\text{Cr}_2\text{N} + \text{H}_2 = \text{CrH}_2 + 1/4\text{N}_2$               | -8.45         | -             | -         | -          |
| Cr-R008 | $1/3\text{Cr}_2\text{N} + \text{H}_2 = 2/3\text{CrH}_3 + 1/6\text{N}_2$            | -6.74         | -             | -         | -          |
| Cr-R009 | $2/3\text{Cr}_2\text{N} + \text{H}_2 = 4/3\text{Cr} + 2/3\text{NH}_3$              | -11.87        | 53.08         | -         | endergonic |
| Cr-R010 | $6/11\text{Cr}_2\text{N} + \text{H}_2 = 4/11\text{Cr}_3\text{H} + 6/11\text{NH}_3$ | -11.3         | -             | -         | -          |
| Cr-R011 | $2/5\text{Cr}_2\text{N} + \text{H}_2 = 4/5\text{CrH} + 2/5\text{NH}_3$             | -10.16        | 57.47         | -         | endergonic |
| Cr-R012 | $2/7\text{Cr}_2\text{N} + \text{H}_2 = 4/7\text{CrH}_2 + 2/7\text{NH}_3$           | -8.45         | -             | -         | -          |
| Cr-R013 | $2/9\text{Cr}_2\text{N} + \text{H}_2 = 4/9\text{CrH}_3 + 2/9\text{NH}_3$           | -6.74         | -             | -         | -          |
| Cr-R014 | $\text{Cr}_3\text{H} + \text{H}_2 = 3\text{CrH}$                                   | 1.28          | -             | -         | -          |
| Cr-R015 | $2/5\text{Cr}_3\text{H} + \text{H}_2 = 6/5\text{CrH}_2$                            | 3.21          | -             | -         | -          |
| Cr-R016 | $1/4\text{Cr}_3\text{H} + \text{H}_2 = 3/4\text{CrH}_3$                            | 5.14          | -             | -         | -          |
| Cr-R017 | $2\text{Cr}_3\text{N}_2 + \text{H}_2 = 2\text{Cr}_3\text{H} + 2\text{N}_2$         | -14.68        | -             | -         | -          |
| Cr-R018 | $2/3\text{Cr}_3\text{N}_2 + \text{H}_2 = 2\text{CrH} + 2/3\text{N}_2$              | -13.58        | 228.51        | -         | endergonic |
| Cr-R019 | $1/3\text{Cr}_3\text{N}_2 + \text{H}_2 = \text{CrH}_2 + 1/3\text{N}_2$             | -11.94        | -             | -         | -          |
| Cr-R020 | $2/9\text{Cr}_3\text{N}_2 + \text{H}_2 = 2/3\text{CrH}_3 + 2/9\text{N}_2$          | -10.29        | -             | -         | -          |
| Cr-R021 | $1/3\text{Cr}_3\text{N}_2 + \text{H}_2 = \text{Cr} + 2/3\text{NH}_3$               | -15.22        | 51.64         | -         | endergonic |
| Cr-R022 | $2/7\text{Cr}_3\text{N}_2 + \text{H}_2 = 2/7\text{Cr}_3\text{H} + 4/7\text{NH}_3$  | -14.68        | -             | -         | -          |
| Cr-R023 | $2/9\text{Cr}_3\text{N}_2 + \text{H}_2 = 2/3\text{CrH} + 4/9\text{NH}_3$           | -13.58        | 55.77         | -         | endergonic |
| Cr-R024 | $1/6\text{Cr}_3\text{N}_2 + \text{H}_2 = 1/2\text{CrH}_2 + 1/3\text{NH}_3$         | -11.94        | -             | -         | -          |
| Cr-R025 | $2/15\text{Cr}_3\text{N}_2 + \text{H}_2 = 2/5\text{CrH}_3 + 4/15\text{NH}_3$       | -10.29        | -             | -         | -          |

|         |                                                                                      |        |         |       |            |
|---------|--------------------------------------------------------------------------------------|--------|---------|-------|------------|
| Cr-R026 | $4/3\text{Cr}_3\text{N}_2 + \text{H}_2 = 2\text{Cr}_2\text{N} + 2/3\text{NH}_3$      | -3.81  | 47.31   | -     | endergonic |
| Cr-R027 | $2\text{Cr}_3\text{N}_4 + \text{H}_2 = 2\text{Cr}_3\text{H} + 4\text{N}_2$           | -25.95 | -       | -     | -          |
| Cr-R028 | $2/3\text{Cr}_3\text{N}_4 + \text{H}_2 = 2\text{CrH} + 4/3\text{N}_2$                | -25    | 228.02  | -     | endergonic |
| Cr-R029 | $1/3\text{Cr}_3\text{N}_4 + \text{H}_2 = \text{CrH}_2 + 2/3\text{N}_2$               | -23.57 | -       | -     | -          |
| Cr-R030 | $2/9\text{Cr}_3\text{N}_4 + \text{H}_2 = 2/3\text{CrH}_3 + 4/9\text{N}_2$            | -22.15 | -       | -     | -          |
| Cr-R031 | $1/6\text{Cr}_3\text{N}_4 + \text{H}_2 = 1/2\text{Cr} + 2/3\text{NH}_3$              | -26.43 | 10.4    | -     | endergonic |
| Cr-R032 | $2/13\text{Cr}_3\text{N}_4 + \text{H}_2 = 2/13\text{Cr}_3\text{H} + 8/13\text{NH}_3$ | -25.95 | -       | -     | -          |
| Cr-R033 | $2/15\text{Cr}_3\text{N}_4 + \text{H}_2 = 2/5\text{CrH} + 8/15\text{NH}_3$           | -25    | 21.13   | -     | endergonic |
| Cr-R034 | $1/9\text{Cr}_3\text{N}_4 + \text{H}_2 = 1/3\text{CrH}_2 + 4/9\text{NH}_3$           | -23.57 | -       | -     | -          |
| Cr-R035 | $2/21\text{Cr}_3\text{N}_4 + \text{H}_2 = 2/7\text{CrH}_3 + 8/21\text{NH}_3$         | -22.15 | -       | -     | -          |
| Cr-R036 | $4/15\text{Cr}_3\text{N}_4 + \text{H}_2 = 2/5\text{Cr}_2\text{N} + 2/3\text{NH}_3$   | -16.52 | -15.22  | -     | exergonic  |
| Cr-R037 | $1/3\text{Cr}_3\text{N}_4 + \text{H}_2 = 1/3\text{Cr}_3\text{N}_2 + 2/3\text{NH}_3$  | -13.21 | -30.85  | -     | exergonic  |
| Cr-R038 | $2/3\text{Cr}_3\text{N}_4 + \text{H}_2 = 2\text{CrN} + 2/3\text{NH}_3$               | -6.61  | -100.93 | -     | exergonic  |
| Cr-R039 | $2\text{CrH} + \text{H}_2 = 2\text{CrH}_2$                                           | 1.9    | -       | -     | -          |
| Cr-R040 | $\text{CrH} + \text{H}_2 = \text{CrH}_3$                                             | 3.8    | -       | -     | -          |
| Cr-R041 | $2\text{CrH}_2 + \text{H}_2 = 2\text{CrH}_3$                                         | 1.87   | -       | -     | -          |
| Cr-R042 | $6\text{CrN} + \text{H}_2 = 2\text{Cr}_3\text{H} + 3\text{N}_2$                      | -20.71 | -       | -     | -          |
| Cr-R043 | $2\text{CrN} + \text{H}_2 = 2\text{CrH} + \text{N}_2$                                | -19.69 | 298.35  | -     | endergonic |
| Cr-R044 | $\text{CrN} + \text{H}_2 = \text{CrH}_2 + 1/2\text{N}_2$                             | -18.17 | -       | -     | -          |
| Cr-R045 | $2/3\text{CrN} + \text{H}_2 = 2/3\text{CrH}_3 + 1/3\text{N}_2$                       | -16.64 | -       | -     | -          |
| Cr-R046 | $2/3\text{CrN} + \text{H}_2 = 2/3\text{Cr} + 2/3\text{NH}_3$                         | -21.22 | 47.51   | -     | endergonic |
| Cr-R047 | $3/5\text{CrN} + \text{H}_2 = 1/5\text{Cr}_3\text{H} + 3/5\text{NH}_3$               | -20.71 | -       | -     | -          |
| Cr-R048 | $1/2\text{CrN} + \text{H}_2 = 1/2\text{CrH} + 1/2\text{NH}_3$                        | -19.69 | 51.64   | -     | endergonic |
| Cr-R049 | $2/5\text{CrN} + \text{H}_2 = 2/5\text{CrH}_2 + 2/5\text{NH}_3$                      | -18.17 | -       | -     | -          |
| Cr-R050 | $1/3\text{CrN} + \text{H}_2 = 1/3\text{CrH}_3 + 1/3\text{NH}_3$                      | -16.64 | -       | -     | -          |
| Cr-R051 | $4/3\text{CrN} + \text{H}_2 = 2/3\text{Cr}_2\text{N} + 2/3\text{NH}_3$               | -10.61 | 41.93   | -     | endergonic |
| Cr-R052 | $2\text{CrN} + \text{H}_2 = 2/3\text{Cr}_3\text{N}_2 + 2/3\text{NH}_3$               | -7.07  | 39.24   | -     | endergonic |
| Cr-R053 | $6\text{CrN}_2 + \text{H}_2 = 2\text{Cr}_3\text{H} + 6\text{N}_2$                    | -34.59 | -       | -     | -          |
| Cr-R054 | $2\text{CrN}_2 + \text{H}_2 = 2\text{CrH} + 2\text{N}_2$                             | -33.75 | 181.37  | 259.7 | exergonic  |
| Cr-R055 | $\text{CrN}_2 + \text{H}_2 = \text{CrH}_2 + \text{N}_2$                              | -32.49 | -       | -     | -          |
| Cr-R056 | $2/3\text{CrN}_2 + \text{H}_2 = 2/3\text{CrH}_3 + 2/3\text{N}_2$                     | -31.23 | -       | -     | -          |
| Cr-R057 | $1/3\text{CrN}_2 + \text{H}_2 = 1/3\text{Cr} + 2/3\text{NH}_3$                       | -35.01 | -11.04  | -     | exergonic  |
| Cr-R058 | $6/19\text{CrN}_2 + \text{H}_2 = 2/19\text{Cr}_3\text{H} + 12/19\text{NH}_3$         | -34.59 | -       | -     | -          |
| Cr-R059 | $2/7\text{CrN}_2 + \text{H}_2 = 2/7\text{CrH} + 4/7\text{NH}_3$                      | -33.75 | -0.32   | -     | endergonic |
| Cr-R060 | $1/4\text{CrN}_2 + \text{H}_2 = 1/4\text{CrH}_2 + 1/2\text{NH}_3$                    | -32.49 | -       | -     | -          |
| Cr-R061 | $2/9\text{CrN}_2 + \text{H}_2 = 2/9\text{CrH}_3 + 4/9\text{NH}_3$                    | -31.23 | -       | -     | -          |
| Cr-R062 | $4/9\text{CrN}_2 + \text{H}_2 = 2/9\text{Cr}_2\text{N} + 2/3\text{NH}_3$             | -26.26 | -32.42  | -     | exergonic  |
| Cr-R063 | $1/2\text{CrN}_2 + \text{H}_2 = 1/6\text{Cr}_3\text{N}_2 + 2/3\text{NH}_3$           | -23.34 | -42.38  | -     | exergonic  |
| Cr-R064 | $\text{CrN}_2 + \text{H}_2 = 1/3\text{Cr}_3\text{N}_4 + 2/3\text{NH}_3$              | -11.67 | -53.92  | -     | exergonic  |
| Cr-R065 | $2/3\text{CrN}_2 + \text{H}_2 = 2/3\text{CrN} + 2/3\text{NH}_3$                      | -17.51 | -69.59  | -     | exergonic  |
| Cr-R066 | $4\text{Cr} + \text{N}_2 = 2\text{Cr}_2\text{N}$                                     | 13.47  | -251.04 | -     | exergonic  |
| Cr-R067 | $3\text{Cr} + \text{N}_2 = \text{Cr}_3\text{N}_2$                                    | 17.96  | -246.71 | -     | exergonic  |
| Cr-R068 | $3/2\text{Cr} + \text{N}_2 = 1/2\text{Cr}_3\text{N}_4$                               | 35.92  | -122.98 | 409.5 | exergonic  |
| Cr-R069 | $2\text{Cr} + \text{N}_2 = 2\text{CrN}$                                              | 26.94  | -234.31 | -     | exergonic  |
| Cr-R070 | $\text{Cr} + \text{N}_2 = \text{CrN}_2$                                              | 53.88  | -58.66  | -     | endergonic |
| Cr-R071 | $6\text{Cr}_2\text{N} + \text{N}_2 = 4\text{Cr}_3\text{N}_2$                         | 3.96   | -233.71 | 513.8 | exergonic  |
| Cr-R072 | $6/5\text{Cr}_2\text{N} + \text{N}_2 = 4/5\text{Cr}_3\text{N}_4$                     | 19.78  | -46.15  | -     | endergonic |
| Cr-R073 | $2\text{Cr}_2\text{N} + \text{N}_2 = 4\text{CrN}$                                    | 11.87  | -217.58 | -     | exergonic  |
| Cr-R074 | $2/3\text{Cr}_2\text{N} + \text{N}_2 = 4/3\text{CrN}_2$                              | 35.61  | 5.46    | -     | endergonic |

|         |                                                                                       |       |         |       |            |
|---------|---------------------------------------------------------------------------------------|-------|---------|-------|------------|
| Cr-R075 | $4/3\text{Cr}_3\text{H} + \text{N}_2 = 2\text{Cr}_2\text{N} + 2/3\text{H}_2$          | 12.74 | -       | -     | -          |
| Cr-R076 | $\text{Cr}_3\text{H} + \text{N}_2 = \text{Cr}_3\text{N}_2 + 1/2\text{H}_2$            | 17.2  | -       | -     | -          |
| Cr-R077 | $1/2\text{Cr}_3\text{H} + \text{N}_2 = 1/2\text{Cr}_3\text{N}_4 + 1/4\text{H}_2$      | 35.05 | -       | -     | -          |
| Cr-R078 | $2/3\text{Cr}_3\text{H} + \text{N}_2 = 2\text{CrN} + 1/3\text{H}_2$                   | 26.12 | -       | -     | -          |
| Cr-R079 | $1/3\text{Cr}_3\text{H} + \text{N}_2 = \text{CrN}_2 + 1/6\text{H}_2$                  | 52.89 | -       | -     | -          |
| Cr-R080 | $6\text{Cr}_3\text{H} + \text{N}_2 = 18\text{Cr} + 2\text{NH}_3$                      | -0.64 | -       | -     | -          |
| Cr-R081 | $12/11\text{Cr}_3\text{H} + \text{N}_2 = 18/11\text{Cr}_2\text{N} + 4/11\text{NH}_3$  | 12.74 | -       | -     | -          |
| Cr-R082 | $6/7\text{Cr}_3\text{H} + \text{N}_2 = 6/7\text{Cr}_3\text{N}_2 + 2/7\text{NH}_3$     | 17.2  | -       | -     | -          |
| Cr-R083 | $6/13\text{Cr}_3\text{H} + \text{N}_2 = 6/13\text{Cr}_3\text{N}_4 + 2/13\text{NH}_3$  | 35.05 | -       | -     | -          |
| Cr-R084 | $3/5\text{Cr}_3\text{H} + \text{N}_2 = 9/5\text{CrN} + 1/5\text{NH}_3$                | 26.12 | -       | -     | -          |
| Cr-R085 | $6/19\text{Cr}_3\text{H} + \text{N}_2 = 18/19\text{Cr}_2\text{N}_2 + 2/19\text{NH}_3$ | 52.89 | -       | -     | -          |
| Cr-R086 | $\text{Cr}_3\text{N}_2 + \text{N}_2 = \text{Cr}_3\text{N}_4$                          | 15.22 | 0.74    | -     | endergonic |
| Cr-R087 | $2\text{Cr}_3\text{N}_2 + \text{N}_2 = 6\text{CrN}$                                   | 7.61  | -209.51 | -     | exergonic  |
| Cr-R088 | $1/2\text{Cr}_3\text{N}_2 + \text{N}_2 = 3/2\text{CrN}_2$                             | 30.45 | 35.36   | -     | endergonic |
| Cr-R089 | $\text{Cr}_3\text{N}_4 + \text{N}_2 = 3\text{CrN}_2$                                  | 13.21 | 69.97   | -     | endergonic |
| Cr-R090 | $4\text{CrH} + \text{N}_2 = 2\text{Cr}_2\text{N} + 2\text{H}_2$                       | 11.31 | -379.12 | -     | exergonic  |
| Cr-R091 | $3\text{CrH} + \text{N}_2 = \text{Cr}_3\text{N}_2 + 3/2\text{H}_2$                    | 15.72 | -342.77 | -     | exergonic  |
| Cr-R092 | $3/2\text{CrH} + \text{N}_2 = 1/2\text{Cr}_3\text{N}_4 + 3/4\text{H}_2$               | 33.33 | -171.01 | -     | exergonic  |
| Cr-R093 | $2\text{CrH} + \text{N}_2 = 2\text{CrN} + \text{H}_2$                                 | 24.52 | -298.35 | -     | exergonic  |
| Cr-R094 | $\text{CrH} + \text{N}_2 = \text{CrN}_2 + 1/2\text{H}_2$                              | 50.95 | -90.68  | 259.7 | exergonic  |
| Cr-R095 | $6\text{CrH} + \text{N}_2 = 6\text{Cr} + 2\text{NH}_3$                                | -1.9  | -283.91 | -     | exergonic  |
| Cr-R096 | $9\text{CrH} + \text{N}_2 = 3\text{Cr}_3\text{H} + 2\text{NH}_3$                      | -1.27 | -       | -     | -          |
| Cr-R097 | $12/5\text{CrH} + \text{N}_2 = 6/5\text{Cr}_2\text{N} + 4/5\text{NH}_3$               | 11.31 | -264.19 | -     | exergonic  |
| Cr-R098 | $2\text{CrH} + \text{N}_2 = 2/3\text{Cr}_3\text{N}_2 + 2/3\text{NH}_3$                | 15.72 | -259.11 | -     | exergonic  |
| Cr-R099 | $6/5\text{CrH} + \text{N}_2 = 2/5\text{Cr}_3\text{N}_4 + 2/5\text{NH}_3$              | 33.33 | -155.17 | -     | exergonic  |
| Cr-R100 | $3/2\text{CrH} + \text{N}_2 = 3/2\text{CrN} + 1/2\text{NH}_3$                         | 24.52 | -246.71 | -     | exergonic  |
| Cr-R101 | $6/7\text{CrH} + \text{N}_2 = 6/7\text{Cr}_2\text{N}_2 + 2/7\text{NH}_3$              | 50.95 | -90.84  | 247.6 | exergonic  |
| Cr-R102 | $4\text{CrH}_2 + \text{N}_2 = 2\text{Cr}_2\text{N} + 4\text{H}_2$                     | 9.23  | -       | -     | -          |
| Cr-R103 | $3\text{CrH}_2 + \text{N}_2 = \text{Cr}_3\text{N}_2 + 3\text{H}_2$                    | 13.56 | -       | -     | -          |
| Cr-R104 | $3/2\text{CrH}_2 + \text{N}_2 = 1/2\text{Cr}_3\text{N}_4 + 3/2\text{H}_2$             | 30.84 | -       | -     | -          |
| Cr-R105 | $2\text{CrH}_2 + \text{N}_2 = 2\text{CrN} + 2\text{H}_2$                              | 22.2  | -       | -     | -          |
| Cr-R106 | $\text{CrH}_2 + \text{N}_2 = \text{CrN}_2 + \text{H}_2$                               | 48.13 | -       | -     | -          |
| Cr-R107 | $3\text{CrH}_2 + \text{N}_2 = 3\text{Cr} + 2\text{NH}_3$                              | -3.73 | -       | -     | -          |
| Cr-R108 | $18/5\text{CrH}_2 + \text{N}_2 = 6/5\text{Cr}_3\text{H} + 2\text{NH}_3$               | -3.11 | -       | -     | -          |
| Cr-R109 | $6\text{CrH}_2 + \text{N}_2 = 6\text{CrH} + 2\text{NH}_3$                             | -1.87 | -       | -     | -          |
| Cr-R110 | $12/7\text{CrH}_2 + \text{N}_2 = 6/7\text{Cr}_2\text{N} + 8/7\text{NH}_3$             | 9.23  | -       | -     | -          |
| Cr-R111 | $3/2\text{CrH}_2 + \text{N}_2 = 1/2\text{Cr}_3\text{N}_2 + \text{NH}_3$               | 13.56 | -       | -     | -          |
| Cr-R112 | $\text{CrH}_2 + \text{N}_2 = 1/3\text{Cr}_3\text{N}_4 + 2/3\text{NH}_3$               | 30.84 | -       | -     | -          |
| Cr-R113 | $6/5\text{CrH}_2 + \text{N}_2 = 6/5\text{CrN} + 4/5\text{NH}_3$                       | 22.2  | -       | -     | -          |
| Cr-R114 | $3/4\text{CrH}_2 + \text{N}_2 = 3/4\text{Cr}_2\text{N}_2 + 1/2\text{NH}_3$            | 48.13 | -       | -     | -          |
| Cr-R115 | $4\text{CrH}_3 + \text{N}_2 = 2\text{Cr}_2\text{N} + 6\text{H}_2$                     | 7.23  | -       | -     | -          |
| Cr-R116 | $3\text{CrH}_3 + \text{N}_2 = \text{Cr}_3\text{N}_2 + 9/2\text{H}_2$                  | 11.48 | -       | -     | -          |
| Cr-R117 | $3/2\text{CrH}_3 + \text{N}_2 = 1/2\text{Cr}_3\text{N}_4 + 9/4\text{H}_2$             | 28.45 | -       | -     | -          |
| Cr-R118 | $2\text{CrH}_3 + \text{N}_2 = 2\text{CrN} + 3\text{H}_2$                              | 19.96 | -       | -     | -          |
| Cr-R119 | $\text{CrH}_3 + \text{N}_2 = \text{CrN}_2 + 3/2\text{H}_2$                            | 45.42 | -       | -     | -          |
| Cr-R120 | $2\text{CrH}_3 + \text{N}_2 = 2\text{Cr} + 2\text{NH}_3$                              | -5.5  | -       | -     | -          |
| Cr-R121 | $9/4\text{CrH}_3 + \text{N}_2 = 3/4\text{Cr}_3\text{H} + 2\text{NH}_3$                | -4.89 | -       | -     | -          |
| Cr-R122 | $3\text{CrH}_3 + \text{N}_2 = 3\text{CrH} + 2\text{NH}_3$                             | -3.66 | -       | -     | -          |
| Cr-R123 | $6\text{CrH}_3 + \text{N}_2 = 6\text{CrH}_2 + 2\text{NH}_3$                           | -1.83 | -       | -     | -          |

|         |                                                                            |       |        |   |            |
|---------|----------------------------------------------------------------------------|-------|--------|---|------------|
| Cr-R124 | $4/3\text{CrH}_3 + \text{N}_2 = 2/3\text{Cr}_2\text{N} + 4/3\text{NH}_3$   | 7.23  | -      | - | -          |
| Cr-R125 | $6/5\text{CrH}_3 + \text{N}_2 = 2/5\text{Cr}_3\text{N}_2 + 6/5\text{NH}_3$ | 11.48 | -      | - | -          |
| Cr-R126 | $6/7\text{CrH}_3 + \text{N}_2 = 2/7\text{Cr}_3\text{N}_4 + 6/7\text{NH}_3$ | 28.45 | -      | - | -          |
| Cr-R127 | $\text{CrH}_3 + \text{N}_2 = \text{CrN} + \text{NH}_3$                     | 19.96 | -      | - | -          |
| Cr-R128 | $2/3\text{CrH}_3 + \text{N}_2 = 2/3\text{Cr}_2\text{N} + 2/3\text{NH}_3$   | 45.42 | -      | - | -          |
| Cr-R129 | $6\text{CrN} + \text{N}_2 = 2\text{Cr}_3\text{N}_4$                        | 7.07  | 211    | - | endergonic |
| Cr-R130 | $2\text{CrN} + \text{N}_2 = 2\text{CrN}_2$                                 | 21.22 | 116.98 | - | endergonic |

Table S18: The Cu-based system

| ID     | Reaction                                                                             | dm_stoich [%] | h298 [kJ/mol] | T_eq [°C] | Type       |
|--------|--------------------------------------------------------------------------------------|---------------|---------------|-----------|------------|
| Cu-R01 | $2\text{Cu} + \text{H}_2 = 2\text{CuH}$                                              | 1.59          | 44.46         | -         | endergonic |
| Cu-R02 | $1/5\text{Cu}_{10}\text{N}_3 + \text{H}_2 = 2\text{CuH} + 3/10\text{N}_2$            | -4.71         | -             | -         | -          |
| Cu-R03 | $2/9\text{Cu}_{10}\text{N}_3 + \text{H}_2 = 20/9\text{Cu} + 2/3\text{NH}_3$          | -6.2          | -             | -         | -          |
| Cu-R04 | $2/19\text{Cu}_{10}\text{N}_3 + \text{H}_2 = 20/19\text{CuH} + 6/19\text{NH}_3$      | -4.71         | -             | -         | -          |
| Cu-R05 | $\text{Cu}_2\text{N} + \text{H}_2 = 2\text{CuH} + 1/2\text{N}_2$                     | -8.5          | -             | -         | -          |
| Cu-R06 | $2/3\text{Cu}_2\text{N} + \text{H}_2 = 4/3\text{Cu} + 2/3\text{NH}_3$                | -9.93         | -             | -         | -          |
| Cu-R07 | $2/5\text{Cu}_2\text{N} + \text{H}_2 = 4/5\text{CuH} + 2/5\text{NH}_3$               | -8.5          | -             | -         | -          |
| Cu-R08 | $5/3\text{Cu}_2\text{N} + \text{H}_2 = 1/3\text{Cu}_{10}\text{N}_3 + 2/3\text{NH}_3$ | -3.97         | -             | -         | -          |
| Cu-R09 | $2\text{Cu}_2\text{N} + \text{H}_2 = 4/3\text{Cu}_3\text{N} + 2/3\text{NH}_3$        | -3.31         | -             | -         | -          |
| Cu-R10 | $2/3\text{Cu}_3\text{N} + \text{H}_2 = 2\text{CuH} + 1/3\text{N}_2$                  | -5.37         | -4.97         | -         | endergonic |
| Cu-R11 | $2/3\text{Cu}_3\text{N} + \text{H}_2 = 2\text{Cu} + 2/3\text{NH}_3$                  | -6.84         | -80.03        | -         | exergonic  |
| Cu-R12 | $1/3\text{Cu}_3\text{N} + \text{H}_2 = \text{CuH} + 1/3\text{NH}_3$                  | -5.37         | -17.78        | 78.7      | exergonic  |
| Cu-R13 | $20/3\text{Cu}_3\text{N} + \text{H}_2 = 2\text{Cu}_{10}\text{N}_3 + 2/3\text{NH}_3$  | -0.68         | -             | -         | -          |
| Cu-R14 | $2\text{CuN} + \text{H}_2 = 2\text{CuH} + \text{N}_2$                                | -16.76        | -262.75       | -         | exergonic  |
| Cu-R15 | $2/3\text{CuN} + \text{H}_2 = 2/3\text{Cu} + 2/3\text{NH}_3$                         | -18.06        | -133          | -         | exergonic  |
| Cu-R16 | $1/2\text{CuN} + \text{H}_2 = 1/2\text{CuH} + 1/2\text{NH}_3$                        | -16.76        | -88.64        | -         | exergonic  |
| Cu-R17 | $20/21\text{CuN} + \text{H}_2 = 2/21\text{Cu}_{10}\text{N}_3 + 2/3\text{NH}_3$       | -12.64        | -             | -         | -          |
| Cu-R18 | $4/3\text{CuN} + \text{H}_2 = 2/3\text{Cu}_2\text{N} + 2/3\text{NH}_3$               | -9.03         | -             | -         | -          |
| Cu-R19 | $\text{CuN} + \text{H}_2 = 1/3\text{Cu}_3\text{N} + 2/3\text{NH}_3$                  | -12.04        | -159.49       | -         | exergonic  |
| Cu-R20 | $2\text{CuN}_3 + \text{H}_2 = 2\text{CuH} + 3\text{N}_2$                             | -38.85        | -182.34       | -         | exergonic  |
| Cu-R21 | $2/9\text{CuN}_3 + \text{H}_2 = 2/9\text{Cu} + 2/3\text{NH}_3$                       | -39.81        | -55.8         | -         | exergonic  |
| Cu-R22 | $1/5\text{CuN}_3 + \text{H}_2 = 1/5\text{CuH} + 3/5\text{NH}_3$                      | -38.85        | -45.77        | 681.5     | exergonic  |
| Cu-R23 | $20/81\text{CuN}_3 + \text{H}_2 = 2/81\text{Cu}_{10}\text{N}_3 + 2/3\text{NH}_3$     | -35.82        | -             | -         | -          |
| Cu-R24 | $4/15\text{CuN}_3 + \text{H}_2 = 2/15\text{Cu}_2\text{N} + 2/3\text{NH}_3$           | -33.17        | -             | -         | -          |
| Cu-R25 | $1/4\text{CuN}_3 + \text{H}_2 = 1/12\text{Cu}_3\text{N} + 2/3\text{NH}_3$            | -35.38        | -52.77        | -         | exergonic  |
| Cu-R26 | $1/3\text{CuN}_3 + \text{H}_2 = 1/3\text{CuN} + 2/3\text{NH}_3$                      | -26.54        | -17.19        | 114.8     | exergonic  |
| Cu-R27 | $2\text{CuN}_6 + \text{H}_2 = 2\text{CuH} + 6\text{N}_2$                             | -56.26        | -413.77       | -         | exergonic  |
| Cu-R28 | $1/9\text{CuN}_6 + \text{H}_2 = 1/9\text{Cu} + 2/3\text{NH}_3$                       | -56.94        | -56.05        | -         | exergonic  |
| Cu-R29 | $2/19\text{CuN}_6 + \text{H}_2 = 2/19\text{CuH} + 12/19\text{NH}_3$                  | -56.26        | -50.76        | -         | exergonic  |
| Cu-R30 | $20/171\text{CuN}_6 + \text{H}_2 = 2/171\text{Cu}_{10}\text{N}_3 + 2/3\text{NH}_3$   | -54.1         | -             | -         | -          |
| Cu-R31 | $4/33\text{CuN}_6 + \text{H}_2 = 2/33\text{Cu}_2\text{N} + 2/3\text{NH}_3$           | -52.2         | -             | -         | -          |
| Cu-R32 | $2/17\text{CuN}_6 + \text{H}_2 = 2/51\text{Cu}_3\text{N} + 2/3\text{NH}_3$           | -53.78        | -54.64        | -         | exergonic  |
| Cu-R33 | $2/15\text{CuN}_6 + \text{H}_2 = 2/15\text{CuN} + 2/3\text{NH}_3$                    | -47.45        | -40.67        | 784.7     | exergonic  |
| Cu-R34 | $2/9\text{CuN}_6 + \text{H}_2 = 2/9\text{CuN}_3 + 2/3\text{NH}_3$                    | -28.47        | -56.31        | -         | exergonic  |
| Cu-R35 | $2\text{CuN}_8 + \text{H}_2 = 2\text{CuH} + 8\text{N}_2$                             | -63.24        | -             | -         | -          |
| Cu-R36 | $1/12\text{CuN}_8 + \text{H}_2 = 1/12\text{Cu} + 2/3\text{NH}_3$                     | -63.81        | -             | -         | -          |
| Cu-R37 | $2/25\text{CuN}_8 + \text{H}_2 = 2/25\text{CuH} + 16/25\text{NH}_3$                  | -63.24        | -             | -         | -          |
| Cu-R38 | $20/231\text{CuN}_8 + \text{H}_2 = 2/231\text{Cu}_{10}\text{N}_3 + 2/3\text{NH}_3$   | -61.42        | -             | -         | -          |

|        |                                                                                  |        |         |       |            |
|--------|----------------------------------------------------------------------------------|--------|---------|-------|------------|
| Cu-R39 | $4/45\text{CuN}_8 + \text{H}_2 = 2/45\text{Cu}_2\text{N} + 2/3\text{NH}_3$       | -59.82 | -       | -     | -          |
| Cu-R40 | $2/23\text{CuN}_8 + \text{H}_2 = 2/69\text{Cu}_3\text{N} + 2/3\text{NH}_3$       | -61.15 | -       | -     | -          |
| Cu-R41 | $2/21\text{CuN}_8 + \text{H}_2 = 2/21\text{CuN} + 2/3\text{NH}_3$                | -55.84 | -       | -     | -          |
| Cu-R42 | $2/15\text{CuN}_8 + \text{H}_2 = 2/15\text{Cu}_3\text{N} + 2/3\text{NH}_3$       | -39.88 | -       | -     | -          |
| Cu-R43 | $1/3\text{CuN}_8 + \text{H}_2 = 1/3\text{CuN}_6 + 2/3\text{NH}_3$                | -15.95 | -       | -     | -          |
| Cu-R44 | $20/3\text{Cu} + \text{N}_2 = 2/3\text{Cu}_{10}\text{N}_3$                       | 6.61   | -       | -     | -          |
| Cu-R45 | $4\text{Cu} + \text{N}_2 = 2\text{Cu}_2\text{N}$                                 | 11.02  | -       | -     | -          |
| Cu-R46 | $6\text{Cu} + \text{N}_2 = 2\text{Cu}_3\text{N}$                                 | 7.35   | 148.29  | -     | endergonic |
| Cu-R47 | $2\text{Cu} + \text{N}_2 = 2\text{CuN}$                                          | 22.04  | 307.21  | -     | endergonic |
| Cu-R48 | $2/3\text{Cu} + \text{N}_2 = 2/3\text{Cu}_3\text{N}$                             | 66.13  | 75.6    | -     | endergonic |
| Cu-R49 | $1/3\text{Cu} + \text{N}_2 = 1/3\text{CuN}_6$                                    | 132.25 | 76.37   | -     | endergonic |
| Cu-R50 | $1/4\text{Cu} + \text{N}_2 = 1/4\text{CuN}_8$                                    | 176.34 | -       | -     | -          |
| Cu-R51 | $\text{Cu}_{10}\text{N}_3 + \text{N}_2 = 5\text{Cu}_2\text{N}$                   | 4.14   | -       | -     | -          |
| Cu-R52 | $6\text{Cu}_{10}\text{N}_3 + \text{N}_2 = 20\text{Cu}_3\text{N}$                 | 0.69   | -       | -     | -          |
| Cu-R53 | $2/7\text{Cu}_{10}\text{N}_3 + \text{N}_2 = 20/7\text{CuN}$                      | 14.47  | -       | -     | -          |
| Cu-R54 | $2/27\text{Cu}_{10}\text{N}_3 + \text{N}_2 = 20/27\text{Cu}_3\text{N}$           | 55.82  | -       | -     | -          |
| Cu-R55 | $2/57\text{Cu}_{10}\text{N}_3 + \text{N}_2 = 20/57\text{CuN}_6$                  | 117.85 | -       | -     | -          |
| Cu-R56 | $2/77\text{Cu}_{10}\text{N}_3 + \text{N}_2 = 20/77\text{CuN}_8$                  | 159.2  | -       | -     | -          |
| Cu-R57 | $2\text{Cu}_2\text{N} + \text{N}_2 = 4\text{CuN}$                                | 9.93   | -       | -     | -          |
| Cu-R58 | $2/5\text{Cu}_2\text{N} + \text{N}_2 = 4/5\text{Cu}_3\text{N}$                   | 49.64  | -       | -     | -          |
| Cu-R59 | $2/11\text{Cu}_2\text{N} + \text{N}_2 = 4/11\text{CuN}_6$                        | 109.2  | -       | -     | -          |
| Cu-R60 | $2/15\text{Cu}_2\text{N} + \text{N}_2 = 4/15\text{CuN}_8$                        | 148.91 | -       | -     | -          |
| Cu-R61 | $4\text{Cu}_3\text{N} + \text{N}_2 = 6\text{Cu}_2\text{N}$                       | 3.42   | -       | -     | -          |
| Cu-R62 | $\text{Cu}_3\text{N} + \text{N}_2 = 3\text{CuN}$                                 | 13.69  | 386.67  | -     | endergonic |
| Cu-R63 | $1/4\text{Cu}_3\text{N} + \text{N}_2 = 3/4\text{Cu}_3\text{N}$                   | 54.76  | 66.51   | -     | endergonic |
| Cu-R64 | $2/17\text{Cu}_3\text{N} + \text{N}_2 = 6/17\text{CuN}_6$                        | 116.36 | 72.14   | -     | endergonic |
| Cu-R65 | $2/23\text{Cu}_3\text{N} + \text{N}_2 = 6/23\text{CuN}_8$                        | 157.42 | -       | -     | -          |
| Cu-R66 | $20/3\text{CuH} + \text{N}_2 = 2/3\text{Cu}_{10}\text{N}_3 + 10/3\text{H}_2$     | 4.95   | -       | -     | -          |
| Cu-R67 | $4\text{CuH} + \text{N}_2 = 2\text{Cu}_2\text{N} + 2\text{H}_2$                  | 9.29   | -       | -     | -          |
| Cu-R68 | $6\text{CuH} + \text{N}_2 = 2\text{Cu}_3\text{N} + 3\text{H}_2$                  | 5.67   | 14.91   | -     | exergonic  |
| Cu-R69 | $2\text{CuH} + \text{N}_2 = 2\text{CuN} + \text{H}_2$                            | 20.14  | 262.75  | -     | endergonic |
| Cu-R70 | $2/3\text{CuH} + \text{N}_2 = 2/3\text{Cu}_3\text{N} + 1/3\text{H}_2$            | 63.53  | 60.78   | -     | endergonic |
| Cu-R71 | $1/3\text{CuH} + \text{N}_2 = 1/3\text{CuN}_6 + 1/6\text{H}_2$                   | 128.63 | 68.96   | -     | endergonic |
| Cu-R72 | $1/4\text{CuH} + \text{N}_2 = 1/4\text{CuN}_8 + 1/8\text{H}_2$                   | 172.02 | -       | -     | -          |
| Cu-R73 | $6\text{CuH} + \text{N}_2 = 6\text{Cu} + 2\text{NH}_3$                           | -1.56  | -225.17 | -     | exergonic  |
| Cu-R74 | $60/19\text{CuH} + \text{N}_2 = 6/19\text{Cu}_{10}\text{N}_3 + 20/19\text{NH}_3$ | 4.95   | -       | -     | -          |
| Cu-R75 | $12/5\text{CuH} + \text{N}_2 = 6/5\text{Cu}_2\text{N} + 4/5\text{NH}_3$          | 9.29   | -       | -     | -          |
| Cu-R76 | $3\text{CuH} + \text{N}_2 = \text{Cu}_3\text{N} + \text{NH}_3$                   | 5.67   | -38.44  | 408.9 | exergonic  |
| Cu-R77 | $3/2\text{CuH} + \text{N}_2 = 3/2\text{CuN} + 1/2\text{NH}_3$                    | 20.14  | 174.12  | -     | endergonic |
| Cu-R78 | $3/5\text{CuH} + \text{N}_2 = 3/5\text{Cu}_3\text{N} + 1/5\text{NH}_3$           | 63.53  | 45.52   | -     | endergonic |
| Cu-R79 | $6/19\text{CuH} + \text{N}_2 = 6/19\text{CuN}_6 + 2/19\text{NH}_3$               | 128.63 | 60.5    | -     | endergonic |
| Cu-R80 | $6/25\text{CuH} + \text{N}_2 = 6/25\text{CuN}_8 + 2/25\text{NH}_3$               | 172.02 | -       | -     | -          |
| Cu-R81 | $\text{CuN} + \text{N}_2 = \text{CuN}_3$                                         | 36.12  | -40.21  | 374.1 | exergonic  |
| Cu-R82 | $2/5\text{CuN} + \text{N}_2 = 2/5\text{CuN}_6$                                   | 90.31  | 30.2    | -     | endergonic |
| Cu-R83 | $2/7\text{CuN} + \text{N}_2 = 2/7\text{CuN}_8$                                   | 126.43 | -       | -     | -          |
| Cu-R84 | $2/3\text{Cu}_3\text{N} + \text{N}_2 = 2/3\text{CuN}_6$                          | 39.81  | 77.14   | -     | endergonic |
| Cu-R85 | $2/5\text{Cu}_3\text{N} + \text{N}_2 = 2/5\text{CuN}_8$                          | 66.34  | -       | -     | -          |
| Cu-R86 | $\text{CuN}_6 + \text{N}_2 = \text{CuN}_8$                                       | 18.98  | -       | -     | -          |



Table S19: The Fe-based system

| ID      | Reaction                                                                                  | dm_stoich [%] | h298 [kJ/mol] | T_eq [°C] | Type       |
|---------|-------------------------------------------------------------------------------------------|---------------|---------------|-----------|------------|
| Fe-R001 | $6\text{Fe} + \text{H}_2 = 2\text{Fe}_3\text{H}$                                          | 0.6           | -             | -         | -          |
| Fe-R002 | $2\text{Fe} + \text{H}_2 = 2\text{FeH}$                                                   | 1.8           | -25.94        | -         | endergonic |
| Fe-R003 | $2/3\text{Fe} + \text{H}_2 = 2/3\text{FeH}_3$                                             | 5.41          | 38.34         | -         | endergonic |
| Fe-R004 | $1/2\text{Fe} + \text{H}_2 = 1/2\text{FeH}_4$                                             | 7.22          | -             | -         | -          |
| Fe-R005 | $1/2\text{Fe}12\text{N}_5 + \text{H}_2 = 2\text{Fe}_3\text{H} + 5/4\text{N}_2$            | -8.92         | -             | -         | -          |
| Fe-R006 | $1/6\text{Fe}12\text{N}_5 + \text{H}_2 = 2\text{FeH} + 5/12\text{N}_2$                    | -7.83         | -             | -         | -          |
| Fe-R007 | $1/18\text{Fe}12\text{N}_5 + \text{H}_2 = 2/3\text{FeH}_3 + 5/36\text{N}_2$               | -4.56         | -             | -         | -          |
| Fe-R008 | $1/24\text{Fe}12\text{N}_5 + \text{H}_2 = 1/2\text{FeH}_4 + 5/48\text{N}_2$               | -2.93         | -             | -         | -          |
| Fe-R009 | $2/15\text{Fe}12\text{N}_5 + \text{H}_2 = 8/5\text{Fe} + 2/3\text{NH}_3$                  | -9.46         | -             | -         | -          |
| Fe-R010 | $2/19\text{Fe}12\text{N}_5 + \text{H}_2 = 8/19\text{Fe}_3\text{H} + 10/19\text{NH}_3$     | -8.92         | -             | -         | -          |
| Fe-R011 | $2/27\text{Fe}12\text{N}_5 + \text{H}_2 = 8/9\text{FeH} + 10/27\text{NH}_3$               | -7.83         | -             | -         | -          |
| Fe-R012 | $2/51\text{Fe}12\text{N}_5 + \text{H}_2 = 8/17\text{FeH}_3 + 10/51\text{NH}_3$            | -4.56         | -             | -         | -          |
| Fe-R013 | $2/63\text{Fe}12\text{N}_5 + \text{H}_2 = 8/21\text{FeH}_4 + 10/63\text{NH}_3$            | -2.93         | -             | -         | -          |
| Fe-R014 | $2/3\text{Fe}12\text{N}_5 + \text{H}_2 = 8/3\text{Fe}_3\text{N} + 2/3\text{NH}_3$         | -1.89         | -             | -         | -          |
| Fe-R015 | $1/3\text{Fe}12\text{N}_5 + \text{H}_2 = \text{Fe}_4\text{N} + 2/3\text{NH}_3$            | -3.78         | -             | -         | -          |
| Fe-R016 | $4/21\text{Fe}12\text{N}_5 + \text{H}_2 = 2/7\text{Fe}_8\text{N} + 2/3\text{NH}_3$        | -6.62         | -             | -         | -          |
| Fe-R017 | $4/3\text{Fe}12\text{N}_5 + \text{H}_2 = 2\text{Fe}_8\text{N}_3 + 2/3\text{NH}_3$         | -0.95         | -             | -         | -          |
| Fe-R018 | $1/4\text{Fe}24\text{N}_{11} + \text{H}_2 = 2\text{Fe}_3\text{H} + 11/8\text{N}_2$        | -9.77         | -             | -         | -          |
| Fe-R019 | $1/12\text{Fe}24\text{N}_{11} + \text{H}_2 = 2\text{FeH} + 11/24\text{N}_2$               | -8.69         | -             | -         | -          |
| Fe-R020 | $1/36\text{Fe}24\text{N}_{11} + \text{H}_2 = 2/3\text{FeH}_3 + 11/72\text{N}_2$           | -5.45         | -             | -         | -          |
| Fe-R021 | $1/48\text{Fe}24\text{N}_{11} + \text{H}_2 = 1/2\text{FeH}_4 + 11/96\text{N}_2$           | -3.84         | -             | -         | -          |
| Fe-R022 | $2/33\text{Fe}24\text{N}_{11} + \text{H}_2 = 16/11\text{Fe} + 2/3\text{NH}_3$             | -10.31        | -             | -         | -          |
| Fe-R023 | $2/41\text{Fe}24\text{N}_{11} + \text{H}_2 = 16/41\text{Fe}_3\text{H} + 22/41\text{NH}_3$ | -9.77         | -             | -         | -          |
| Fe-R024 | $2/57\text{Fe}24\text{N}_{11} + \text{H}_2 = 16/19\text{FeH} + 22/57\text{NH}_3$          | -8.69         | -             | -         | -          |
| Fe-R025 | $2/105\text{Fe}24\text{N}_{11} + \text{H}_2 = 16/35\text{FeH}_3 + 22/105\text{NH}_3$      | -5.45         | -             | -         | -          |
| Fe-R026 | $2/129\text{Fe}24\text{N}_{11} + \text{H}_2 = 16/43\text{FeH}_4 + 22/129\text{NH}_3$      | -3.84         | -             | -         | -          |
| Fe-R027 | $2/3\text{Fe}24\text{N}_{11} + \text{H}_2 = 4/3\text{Fe}12\text{N}_5 + 2/3\text{NH}_3$    | -0.94         | -             | -         | -          |
| Fe-R028 | $2/9\text{Fe}24\text{N}_{11} + \text{H}_2 = 16/9\text{Fe}_3\text{N} + 2/3\text{NH}_3$     | -2.81         | -             | -         | -          |
| Fe-R029 | $2/15\text{Fe}24\text{N}_{11} + \text{H}_2 = 4/5\text{Fe}_4\text{N} + 2/3\text{NH}_3$     | -4.69         | -             | -         | -          |
| Fe-R030 | $1/12\text{Fe}24\text{N}_{11} + \text{H}_2 = 1/4\text{Fe}_8\text{N} + 2/3\text{NH}_3$     | -7.5          | -             | -         | -          |
| Fe-R031 | $1/3\text{Fe}24\text{N}_{11} + \text{H}_2 = \text{Fe}_8\text{N}_3 + 2/3\text{NH}_3$       | -1.87         | -             | -         | -          |
| Fe-R032 | $3\text{Fe}_2\text{N} + \text{H}_2 = 2\text{Fe}_3\text{H} + 3/2\text{N}_2$                | -10.61        | -             | -         | -          |
| Fe-R033 | $\text{Fe}_2\text{N} + \text{H}_2 = 2\text{FeH} + 1/2\text{N}_2$                          | -9.54         | -22.18        | 61.6      | exergonic  |
| Fe-R034 | $1/3\text{Fe}_2\text{N} + \text{H}_2 = 2/3\text{FeH}_3 + 1/6\text{N}_2$                   | -6.33         | 39.6          | -         | endergonic |
| Fe-R035 | $1/4\text{Fe}_2\text{N} + \text{H}_2 = 1/2\text{FeH}_4 + 1/8\text{N}_2$                   | -4.73         | -             | -         | -          |
| Fe-R036 | $2/3\text{Fe}_2\text{N} + \text{H}_2 = 4/3\text{Fe} + 2/3\text{NH}_3$                     | -11.14        | -28.09        | 468.6     | exergonic  |
| Fe-R037 | $6/11\text{Fe}_2\text{N} + \text{H}_2 = 4/11\text{Fe}_3\text{H} + 6/11\text{NH}_3$        | -10.61        | -             | -         | -          |
| Fe-R038 | $2/5\text{Fe}_2\text{N} + \text{H}_2 = 4/5\text{FeH} + 2/5\text{NH}_3$                    | -9.54         | -27.23        | 136.2     | exergonic  |
| Fe-R039 | $2/9\text{Fe}_2\text{N} + \text{H}_2 = 4/9\text{FeH}_3 + 2/9\text{NH}_3$                  | -6.33         | 16.2          | -         | endergonic |
| Fe-R040 | $2/11\text{Fe}_2\text{N} + \text{H}_2 = 4/11\text{FeH}_4 + 2/11\text{NH}_3$               | -4.73         | -             | -         | -          |
| Fe-R041 | $4\text{Fe}_2\text{N} + \text{H}_2 = 2/3\text{Fe}12\text{N}_5 + 2/3\text{NH}_3$           | -1.86         | -             | -         | -          |
| Fe-R042 | $8\text{Fe}_2\text{N} + \text{H}_2 = 2/3\text{Fe}24\text{N}_{11} + 2/3\text{NH}_3$        | -0.93         | -             | -         | -          |
| Fe-R043 | $2\text{Fe}_2\text{N} + \text{H}_2 = 4/3\text{Fe}_3\text{N} + 2/3\text{NH}_3$             | -3.71         | -104.24       | 459.3     | exergonic  |
| Fe-R044 | $4/3\text{Fe}_2\text{N} + \text{H}_2 = 2/3\text{Fe}_4\text{N} + 2/3\text{NH}_3$           | -5.57         | -32.97        | 571.6     | exergonic  |
| Fe-R045 | $8/9\text{Fe}_2\text{N} + \text{H}_2 = 2/9\text{Fe}_8\text{N} + 2/3\text{NH}_3$           | -8.36         | -40.56        | 456.5     | exergonic  |

|         |                                                                                        |       |         |       |            |
|---------|----------------------------------------------------------------------------------------|-------|---------|-------|------------|
| Fe-R046 | $8/3\text{Fe}_2\text{N} + \text{H}_2 = 2/3\text{Fe}_8\text{N}_3 + 2/3\text{NH}_3$      | -2.79 | -129.81 | 656.3 | exergonic  |
| Fe-R047 | $\text{Fe}_3\text{H} + \text{H}_2 = 3\text{FeH}$                                       | 1.2   | -       | -     | -          |
| Fe-R048 | $1/4\text{Fe}_3\text{H} + \text{H}_2 = 3/4\text{FeH}_3$                                | 4.78  | -       | -     | -          |
| Fe-R049 | $2/11\text{Fe}_3\text{H} + \text{H}_2 = 6/11\text{FeH}_4$                              | 6.58  | -       | -     | -          |
| Fe-R050 | $2\text{Fe}_3\text{N} + \text{H}_2 = 2\text{Fe}_3\text{H} + \text{N}_2$                | -7.16 | -       | -     | -          |
| Fe-R051 | $2/3\text{Fe}_3\text{N} + \text{H}_2 = 2\text{FeH} + 1/3\text{N}_2$                    | -6.05 | 14.64   | -     | endergonic |
| Fe-R052 | $2/9\text{Fe}_3\text{N} + \text{H}_2 = 2/3\text{FeH}_3 + 1/9\text{N}_2$                | -2.72 | 51.87   | -     | endergonic |
| Fe-R053 | $1/6\text{Fe}_3\text{N} + \text{H}_2 = 1/2\text{FeH}_4 + 1/12\text{N}_2$               | -1.05 | -       | -     | -          |
| Fe-R054 | $2/3\text{Fe}_3\text{N} + \text{H}_2 = 2\text{Fe} + 2/3\text{NH}_3$                    | -7.72 | 9.99    | 415.8 | exergonic  |
| Fe-R055 | $1/2\text{Fe}_3\text{N} + \text{H}_2 = 1/2\text{Fe}_3\text{H} + 1/2\text{NH}_3$        | -7.16 | -       | -     | -          |
| Fe-R056 | $1/3\text{Fe}_3\text{N} + \text{H}_2 = \text{FeH} + 1/3\text{NH}_3$                    | -6.05 | -7.98   | -     | endergonic |
| Fe-R057 | $1/6\text{Fe}_3\text{N} + \text{H}_2 = 1/2\text{FeH}_3 + 1/6\text{NH}_3$               | -2.72 | 31.25   | -     | endergonic |
| Fe-R058 | $2/15\text{Fe}_3\text{N} + \text{H}_2 = 2/5\text{FeH}_4 + 2/15\text{NH}_3$             | -1.05 | -       | -     | -          |
| Fe-R059 | $8/3\text{Fe}_3\text{N} + \text{H}_2 = 2\text{Fe}_4\text{N} + 2/3\text{NH}_3$          | -1.93 | 109.57  | 380.7 | exergonic  |
| Fe-R060 | $16/15\text{Fe}_3\text{N} + \text{H}_2 = 2/5\text{Fe}_8\text{N} + 2/3\text{NH}_3$      | -4.82 | 10.38   | 507.1 | exergonic  |
| Fe-R061 | $3/2\text{Fe}_4\text{N} + \text{H}_2 = 2\text{Fe}_3\text{H} + 3/4\text{N}_2$           | -5.33 | -       | -     | -          |
| Fe-R062 | $1/2\text{Fe}_4\text{N} + \text{H}_2 = 2\text{FeH} + 1/4\text{N}_2$                    | -4.2  | -20.4   | -     | endergonic |
| Fe-R063 | $1/6\text{Fe}_4\text{N} + \text{H}_2 = 2/3\text{FeH}_3 + 1/12\text{N}_2$               | -0.81 | 40.19   | -     | endergonic |
| Fe-R064 | $1/8\text{Fe}_4\text{N} + \text{H}_2 = 1/2\text{FeH}_4 + 1/16\text{N}_2$               | 0.89  | -       | -     | -          |
| Fe-R065 | $2/3\text{Fe}_4\text{N} + \text{H}_2 = 8/3\text{Fe} + 2/3\text{NH}_3$                  | -5.9  | -23.21  | 365.4 | exergonic  |
| Fe-R066 | $6/13\text{Fe}_4\text{N} + \text{H}_2 = 8/13\text{Fe}_3\text{H} + 6/13\text{NH}_3$     | -5.33 | -       | -     | -          |
| Fe-R067 | $2/7\text{Fe}_4\text{N} + \text{H}_2 = 8/7\text{FeH} + 2/7\text{NH}_3$                 | -4.2  | -24.77  | 36.4  | exergonic  |
| Fe-R068 | $2/15\text{Fe}_4\text{N} + \text{H}_2 = 8/15\text{FeH}_3 + 2/15\text{NH}_3$            | -0.81 | 26.03   | -     | endergonic |
| Fe-R069 | $2/19\text{Fe}_4\text{N} + \text{H}_2 = 8/19\text{FeH}_4 + 2/19\text{NH}_3$            | 0.89  | -       | -     | -          |
| Fe-R070 | $4/3\text{Fe}_4\text{N} + \text{H}_2 = 2/3\text{Fe}_8\text{N} + 2/3\text{NH}_3$        | -2.95 | -55.75  | 365.2 | exergonic  |
| Fe-R071 | $3/4\text{Fe}_8\text{N} + \text{H}_2 = 2\text{Fe}_3\text{H} + 3/8\text{N}_2$           | -2.46 | -       | -     | -          |
| Fe-R072 | $1/4\text{Fe}_8\text{N} + \text{H}_2 = 2\text{FeH} + 1/8\text{N}_2$                    | -1.29 | -10.97  | -     | endergonic |
| Fe-R073 | $1/12\text{Fe}_8\text{N} + \text{H}_2 = 2/3\text{FeH}_3 + 1/24\text{N}_2$              | 2.21  | 43.34   | -     | endergonic |
| Fe-R074 | $1/16\text{Fe}_8\text{N} + \text{H}_2 = 1/2\text{FeH}_4 + 1/32\text{N}_2$              | 3.96  | -       | -     | -          |
| Fe-R075 | $2/3\text{Fe}_8\text{N} + \text{H}_2 = 16/3\text{Fe} + 2/3\text{NH}_3$                 | -3.04 | 9.34    | 363.9 | exergonic  |
| Fe-R076 | $6/17\text{Fe}_8\text{N} + \text{H}_2 = 16/17\text{Fe}_3\text{H} + 6/17\text{NH}_3$    | -2.46 | -       | -     | -          |
| Fe-R077 | $2/11\text{Fe}_8\text{N} + \text{H}_2 = 16/11\text{FeH} + 2/11\text{NH}_3$             | -1.29 | -16.32  | -     | endergonic |
| Fe-R078 | $2/27\text{Fe}_8\text{N} + \text{H}_2 = 16/27\text{FeH}_3 + 2/27\text{NH}_3$           | 2.21  | 35.12   | -     | endergonic |
| Fe-R079 | $2/35\text{Fe}_8\text{N} + \text{H}_2 = 16/35\text{FeH}_4 + 2/35\text{NH}_3$           | 3.96  | -       | -     | -          |
| Fe-R080 | $3/4\text{Fe}_8\text{N}_3 + \text{H}_2 = 2\text{Fe}_3\text{H} + 9/8\text{N}_2$         | -8.05 | -       | -     | -          |
| Fe-R081 | $1/4\text{Fe}_8\text{N}_3 + \text{H}_2 = 2\text{FeH} + 3/8\text{N}_2$                  | -6.95 | 15.03   | -     | endergonic |
| Fe-R082 | $1/12\text{Fe}_8\text{N}_3 + \text{H}_2 = 2/3\text{FeH}_3 + 1/8\text{N}_2$             | -3.65 | 52      | -     | endergonic |
| Fe-R083 | $1/16\text{Fe}_8\text{N}_3 + \text{H}_2 = 1/2\text{FeH}_4 + 3/32\text{N}_2$            | -2    | -       | -     | -          |
| Fe-R084 | $2/9\text{Fe}_8\text{N}_3 + \text{H}_2 = 16/9\text{Fe} + 2/3\text{NH}_3$               | -8.6  | 5.82    | -     | endergonic |
| Fe-R085 | $6/35\text{Fe}_8\text{N}_3 + \text{H}_2 = 16/35\text{Fe}_3\text{H} + 18/35\text{NH}_3$ | -8.05 | -       | -     | -          |
| Fe-R086 | $2/17\text{Fe}_8\text{N}_3 + \text{H}_2 = 16/17\text{FeH} + 6/17\text{NH}_3$           | -6.95 | -9.13   | -     | endergonic |
| Fe-R087 | $2/33\text{Fe}_8\text{N}_3 + \text{H}_2 = 16/33\text{FeH}_3 + 2/11\text{NH}_3$         | -3.65 | 29.47   | -     | endergonic |
| Fe-R088 | $2/41\text{Fe}_8\text{N}_3 + \text{H}_2 = 16/41\text{FeH}_4 + 6/41\text{NH}_3$         | -2    | -       | -     | -          |
| Fe-R089 | $2\text{Fe}_8\text{N}_3 + \text{H}_2 = 16/3\text{Fe}_3\text{N} + 2/3\text{NH}_3$       | -0.96 | -27.52  | -     | endergonic |
| Fe-R090 | $2/3\text{Fe}_8\text{N}_3 + \text{H}_2 = 4/3\text{Fe}_4\text{N} + 2/3\text{NH}_3$      | -2.87 | 63.88   | 751.2 | exergonic  |
| Fe-R091 | $1/3\text{Fe}_8\text{N}_3 + \text{H}_2 = 1/3\text{Fe}_8\text{N} + 2/3\text{NH}_3$      | -5.73 | 4.06    | -     | endergonic |
| Fe-R092 | $\text{FeH} + \text{H}_2 = \text{FeH}_3$                                               | 3.55  | 70.49   | -     | endergonic |
| Fe-R093 | $2/3\text{FeH} + \text{H}_2 = 2/3\text{FeH}_4$                                         | 5.32  | -       | -     | -          |
| Fe-R094 | $2\text{FeH}_3 + \text{H}_2 = 2\text{FeH}_4$                                           | 1.71  | -       | -     | -          |

|         |                                                                                      |        |         |       |            |
|---------|--------------------------------------------------------------------------------------|--------|---------|-------|------------|
| Fe-R095 | $6\text{FeN} + \text{H}_2 = 2\text{Fe}_3\text{H} + 3\text{N}_2$                      | -19.57 | -       | -     | -          |
| Fe-R096 | $2\text{FeN} + \text{H}_2 = 2\text{FeH} + \text{N}_2$                                | -18.61 | 95.13   | -     | endergonic |
| Fe-R097 | $2/3\text{FeN} + \text{H}_2 = 2/3\text{FeH}_3 + 1/3\text{N}_2$                       | -15.72 | 78.7    | -     | endergonic |
| Fe-R098 | $1/2\text{FeN} + \text{H}_2 = 1/2\text{FeH}_4 + 1/4\text{N}_2$                       | -14.28 | -       | -     | -          |
| Fe-R099 | $2/3\text{FeN} + \text{H}_2 = 2/3\text{Fe} + 2/3\text{NH}_3$                         | -20.05 | 9.76    | -     | endergonic |
| Fe-R100 | $3/5\text{FeN} + \text{H}_2 = 1/5\text{Fe}_3\text{H} + 3/5\text{NH}_3$               | -19.57 | -       | -     | -          |
| Fe-R101 | $1/2\text{FeN} + \text{H}_2 = 1/2\text{FeH} + 1/2\text{NH}_3$                        | -18.61 | 0.83    | -     | endergonic |
| Fe-R102 | $1/3\text{FeN} + \text{H}_2 = 1/3\text{FeH}_3 + 1/3\text{NH}_3$                      | -15.72 | 24.05   | -     | endergonic |
| Fe-R103 | $2/7\text{FeN} + \text{H}_2 = 2/7\text{FeH}_4 + 2/7\text{NH}_3$                      | -14.28 | -       | -     | -          |
| Fe-R104 | $8/7\text{FeN} + \text{H}_2 = 2/21\text{Fe}_{12}\text{N}_5 + 2/3\text{NH}_3$         | -11.7  | -       | -     | -          |
| Fe-R105 | $16/13\text{FeN} + \text{H}_2 = 2/39\text{Fe}_{24}\text{N}_{11} + 2/3\text{NH}_3$    | -10.86 | -       | -     | -          |
| Fe-R106 | $4/3\text{FeN} + \text{H}_2 = 2/3\text{Fe}_2\text{N} + 2/3\text{NH}_3$               | -10.03 | 47.61   | -     | endergonic |
| Fe-R107 | $\text{FeN} + \text{H}_2 = 1/3\text{Fe}_3\text{N} + 2/3\text{NH}_3$                  | -13.37 | 9.65    | -     | endergonic |
| Fe-R108 | $8/9\text{FeN} + \text{H}_2 = 2/9\text{Fe}_4\text{N} + 2/3\text{NH}_3$               | -15.04 | 20.75   | -     | endergonic |
| Fe-R109 | $16/21\text{FeN} + \text{H}_2 = 2/21\text{Fe}_8\text{N}_3 + 2/3\text{NH}_3$          | -17.55 | 9.82    | -     | endergonic |
| Fe-R110 | $16/15\text{FeN} + \text{H}_2 = 2/15\text{Fe}_8\text{N}_3 + 2/3\text{NH}_3$          | -12.53 | 12.12   | -     | endergonic |
| Fe-R111 | $6\text{FeN}_2 + \text{H}_2 = 2\text{Fe}_3\text{H} + 6\text{N}_2$                    | -33.01 | -       | -     | -          |
| Fe-R112 | $2\text{FeN}_2 + \text{H}_2 = 2\text{FeH} + 2\text{N}_2$                             | -32.2  | -       | -     | -          |
| Fe-R113 | $2/3\text{FeN}_2 + \text{H}_2 = 2/3\text{FeH}_3 + 2/3\text{N}_2$                     | -29.8  | -       | -     | -          |
| Fe-R114 | $1/2\text{FeN}_2 + \text{H}_2 = 1/2\text{FeH}_4 + 1/2\text{N}_2$                     | -28.6  | -       | -     | -          |
| Fe-R115 | $1/3\text{FeN}_2 + \text{H}_2 = 1/3\text{Fe} + 2/3\text{NH}_3$                       | -33.41 | -       | -     | -          |
| Fe-R116 | $6/19\text{FeN}_2 + \text{H}_2 = 2/19\text{Fe}_3\text{H} + 12/19\text{NH}_3$         | -33.01 | -       | -     | -          |
| Fe-R117 | $2/7\text{FeN}_2 + \text{H}_2 = 2/7\text{FeH} + 4/7\text{NH}_3$                      | -32.2  | -       | -     | -          |
| Fe-R118 | $2/9\text{FeN}_2 + \text{H}_2 = 2/9\text{FeH}_3 + 4/9\text{NH}_3$                    | -29.8  | -       | -     | -          |
| Fe-R119 | $1/5\text{FeN}_2 + \text{H}_2 = 1/5\text{FeH}_4 + 2/5\text{NH}_3$                    | -28.6  | -       | -     | -          |
| Fe-R120 | $8/19\text{FeN}_2 + \text{H}_2 = 2/57\text{Fe}_{12}\text{N}_5 + 2/3\text{NH}_3$      | -26.45 | -       | -     | -          |
| Fe-R121 | $16/37\text{FeN}_2 + \text{H}_2 = 2/111\text{Fe}_{24}\text{N}_{11} + 2/3\text{NH}_3$ | -25.75 | -       | -     | -          |
| Fe-R122 | $4/9\text{FeN}_2 + \text{H}_2 = 2/9\text{Fe}_2\text{N} + 2/3\text{NH}_3$             | -25.05 | -       | -     | -          |
| Fe-R123 | $2/5\text{FeN}_2 + \text{H}_2 = 2/15\text{Fe}_3\text{N} + 2/3\text{NH}_3$            | -27.84 | -       | -     | -          |
| Fe-R124 | $8/21\text{FeN}_2 + \text{H}_2 = 2/21\text{Fe}_4\text{N} + 2/3\text{NH}_3$           | -29.23 | -       | -     | -          |
| Fe-R125 | $16/45\text{FeN}_2 + \text{H}_2 = 2/45\text{Fe}_8\text{N}_3 + 2/3\text{NH}_3$        | -31.32 | -       | -     | -          |
| Fe-R126 | $16/39\text{FeN}_2 + \text{H}_2 = 2/39\text{Fe}_8\text{N}_3 + 2/3\text{NH}_3$        | -27.14 | -       | -     | -          |
| Fe-R127 | $2/3\text{FeN}_2 + \text{H}_2 = 2/3\text{FeN} + 2/3\text{NH}_3$                      | -16.7  | -       | -     | -          |
| Fe-R128 | $24/5\text{Fe} + \text{N}_2 = 2/5\text{Fe}_{12}\text{N}_5$                           | 10.45  | -       | -     | -          |
| Fe-R129 | $48/11\text{Fe} + \text{N}_2 = 2/11\text{Fe}_{24}\text{N}_{11}$                      | 11.5   | -       | -     | -          |
| Fe-R130 | $4\text{Fe} + \text{N}_2 = 2\text{Fe}_2\text{N}$                                     | 12.54  | -7.53   | -     | endergonic |
| Fe-R131 | $6\text{Fe} + \text{N}_2 = 2\text{Fe}_3\text{N}$                                     | 8.36   | -121.76 | 218.7 | exergonic  |
| Fe-R132 | $8\text{Fe} + \text{N}_2 = 2\text{Fe}_4\text{N}$                                     | 6.27   | -22.18  | -     | endergonic |
| Fe-R133 | $16\text{Fe} + \text{N}_2 = 2\text{Fe}_8\text{N}$                                    | 3.14   | -119.82 | 218.2 | exergonic  |
| Fe-R134 | $16/3\text{Fe} + \text{N}_2 = 2/3\text{Fe}_8\text{N}_3$                              | 9.41   | -109.26 | 297.7 | exergonic  |
| Fe-R135 | $2\text{Fe} + \text{N}_2 = 2\text{FeN}$                                              | 25.08  | -121.07 | 450.3 | exergonic  |
| Fe-R136 | $\text{Fe} + \text{N}_2 = \text{FeN}_2$                                              | 50.16  | -       | -     | -          |
| Fe-R137 | $4\text{Fe}_{12}\text{N}_5 + \text{N}_2 = 2\text{Fe}_{24}\text{N}_{11}$              | 0.95   | -       | -     | -          |
| Fe-R138 | $2\text{Fe}_{12}\text{N}_5 + \text{N}_2 = 12\text{Fe}_2\text{N}$                     | 1.89   | -       | -     | -          |
| Fe-R139 | $2/7\text{Fe}_{12}\text{N}_5 + \text{N}_2 = 24/7\text{FeN}$                          | 13.25  | -       | -     | -          |
| Fe-R140 | $2/19\text{Fe}_{12}\text{N}_5 + \text{N}_2 = 24/19\text{FeN}_2$                      | 35.96  | -       | -     | -          |
| Fe-R141 | $2\text{Fe}_{24}\text{N}_{11} + \text{N}_2 = 24\text{Fe}_2\text{N}$                  | 0.94   | -       | -     | -          |
| Fe-R142 | $2/13\text{Fe}_{24}\text{N}_{11} + \text{N}_2 = 48/13\text{FeN}$                     | 12.19  | -       | -     | -          |
| Fe-R143 | $2/37\text{Fe}_{24}\text{N}_{11} + \text{N}_2 = 48/37\text{FeN}_2$                   | 34.68  | -       | -     | -          |

|         |                                                                                              |       |         |       |            |
|---------|----------------------------------------------------------------------------------------------|-------|---------|-------|------------|
| Fe-R144 | $2\text{Fe}_2\text{N} + \text{N}_2 = 4\text{FeN}$                                            | 11.14 | -234.62 | 713.9 | exergonic  |
| Fe-R145 | $2/3\text{Fe}_2\text{N} + \text{N}_2 = 4/3\text{FeN}_2$                                      | 33.43 | -       | -     | -          |
| Fe-R146 | $8/5\text{Fe}_3\text{H} + \text{N}_2 = 2/5\text{Fe}_{12}\text{N}_5 + 4/5\text{H}_2$          | 9.79  | -       | -     | -          |
| Fe-R147 | $16/11\text{Fe}_3\text{H} + \text{N}_2 = 2/11\text{Fe}_{24}\text{N}_{11} + 8/11\text{H}_2$   | 10.83 | -       | -     | -          |
| Fe-R148 | $4/3\text{Fe}_3\text{H} + \text{N}_2 = 2\text{Fe}_2\text{N} + 2/3\text{H}_2$                 | 11.87 | -       | -     | -          |
| Fe-R149 | $2\text{Fe}_3\text{H} + \text{N}_2 = 2\text{Fe}_3\text{N} + \text{H}_2$                      | 7.71  | -       | -     | -          |
| Fe-R150 | $8/3\text{Fe}_3\text{H} + \text{N}_2 = 2\text{Fe}_4\text{N} + 4/3\text{H}_2$                 | 5.63  | -       | -     | -          |
| Fe-R151 | $16/3\text{Fe}_3\text{H} + \text{N}_2 = 2\text{Fe}_8\text{N} + 8/3\text{H}_2$                | 2.52  | -       | -     | -          |
| Fe-R152 | $16/9\text{Fe}_3\text{H} + \text{N}_2 = 2/3\text{Fe}_8\text{N}_3 + 8/9\text{H}_2$            | 8.75  | -       | -     | -          |
| Fe-R153 | $2/3\text{Fe}_3\text{H} + \text{N}_2 = 2\text{FeN} + 1/3\text{H}_2$                          | 24.33 | -       | -     | -          |
| Fe-R154 | $1/3\text{Fe}_3\text{H} + \text{N}_2 = \text{FeN}_2 + 1/6\text{H}_2$                         | 49.27 | -       | -     | -          |
| Fe-R155 | $6\text{Fe}_3\text{H} + \text{N}_2 = 18\text{Fe} + 2\text{NH}_3$                             | -0.6  | -       | -     | -          |
| Fe-R156 | $24/19\text{Fe}_3\text{H} + \text{N}_2 = 6/19\text{Fe}_{12}\text{N}_5 + 8/19\text{NH}_3$     | 9.79  | -       | -     | -          |
| Fe-R157 | $48/41\text{Fe}_3\text{H} + \text{N}_2 = 6/41\text{Fe}_{24}\text{N}_{11} + 16/41\text{NH}_3$ | 10.83 | -       | -     | -          |
| Fe-R158 | $12/11\text{Fe}_3\text{H} + \text{N}_2 = 18/11\text{Fe}_2\text{N} + 4/11\text{NH}_3$         | 11.87 | -       | -     | -          |
| Fe-R159 | $3/2\text{Fe}_3\text{H} + \text{N}_2 = 3/2\text{Fe}_3\text{N} + 1/2\text{NH}_3$              | 7.71  | -       | -     | -          |
| Fe-R160 | $24/13\text{Fe}_3\text{H} + \text{N}_2 = 18/13\text{Fe}_4\text{N} + 8/13\text{NH}_3$         | 5.63  | -       | -     | -          |
| Fe-R161 | $48/17\text{Fe}_3\text{H} + \text{N}_2 = 18/17\text{Fe}_8\text{N} + 16/17\text{NH}_3$        | 2.52  | -       | -     | -          |
| Fe-R162 | $48/35\text{Fe}_3\text{H} + \text{N}_2 = 18/35\text{Fe}_8\text{N}_3 + 16/35\text{NH}_3$      | 8.75  | -       | -     | -          |
| Fe-R163 | $3/5\text{Fe}_3\text{H} + \text{N}_2 = 9/5\text{FeN} + 1/5\text{NH}_3$                       | 24.33 | -       | -     | -          |
| Fe-R164 | $6/19\text{Fe}_3\text{H} + \text{N}_2 = 18/19\text{FeN}_2 + 2/19\text{NH}_3$                 | 49.27 | -       | -     | -          |
| Fe-R165 | $8\text{Fe}_3\text{N} + \text{N}_2 = 2\text{Fe}_{12}\text{N}_5$                              | 1.93  | -       | -     | -          |
| Fe-R166 | $16/3\text{Fe}_3\text{N} + \text{N}_2 = 2/3\text{Fe}_{24}\text{N}_{11}$                      | 2.89  | -       | -     | -          |
| Fe-R167 | $4\text{Fe}_3\text{N} + \text{N}_2 = 6\text{Fe}_2\text{N}$                                   | 3.86  | 220.92  | 687.5 | exergonic  |
| Fe-R168 | $16\text{Fe}_3\text{N} + \text{N}_2 = 6\text{Fe}_8\text{N}_3$                                | 0.96  | -9.24   | -     | exergonic  |
| Fe-R169 | $\text{Fe}_3\text{N} + \text{N}_2 = 3\text{FeN}$                                             | 15.43 | -120.73 | 731.6 | exergonic  |
| Fe-R170 | $2/5\text{Fe}_3\text{N} + \text{N}_2 = 6/5\text{FeN}_2$                                      | 38.58 | -       | -     | -          |
| Fe-R171 | $3\text{Fe}_4\text{N} + \text{N}_2 = \text{Fe}_{12}\text{N}_5$                               | 3.93  | -       | -     | -          |
| Fe-R172 | $12/5\text{Fe}_4\text{N} + \text{N}_2 = 2/5\text{Fe}_{24}\text{N}_{11}$                      | 4.92  | -       | -     | -          |
| Fe-R173 | $2\text{Fe}_4\text{N} + \text{N}_2 = 4\text{Fe}_2\text{N}$                                   | 5.9   | 7.11    | -     | endergonic |
| Fe-R174 | $6\text{Fe}_4\text{N} + \text{N}_2 = 8\text{Fe}_3\text{N}$                                   | 1.97  | -420.51 | 323.2 | exergonic  |
| Fe-R175 | $4\text{Fe}_4\text{N} + \text{N}_2 = 2\text{Fe}_8\text{N}_3$                                 | 2.95  | -283.42 | 466.7 | exergonic  |
| Fe-R176 | $2/3\text{Fe}_4\text{N} + \text{N}_2 = 8/3\text{FeN}$                                        | 17.7  | -154.04 | 536.2 | exergonic  |
| Fe-R177 | $2/7\text{Fe}_4\text{N} + \text{N}_2 = 8/7\text{FeN}_2$                                      | 41.3  | -       | -     | -          |
| Fe-R178 | $6/7\text{Fe}_8\text{N} + \text{N}_2 = 4/7\text{Fe}_{12}\text{N}_5$                          | 7.09  | -       | -     | -          |
| Fe-R179 | $3/4\text{Fe}_8\text{N} + \text{N}_2 = 1/4\text{Fe}_{24}\text{N}_{11}$                       | 8.11  | -       | -     | -          |
| Fe-R180 | $2/3\text{Fe}_8\text{N} + \text{N}_2 = 8/3\text{Fe}_2\text{N}$                               | 9.12  | 29.9    | -     | endergonic |
| Fe-R181 | $6/5\text{Fe}_8\text{N} + \text{N}_2 = 16/5\text{Fe}_3\text{N}$                              | 5.07  | -122.92 | 219.1 | exergonic  |
| Fe-R182 | $2\text{Fe}_8\text{N} + \text{N}_2 = 4\text{Fe}_4\text{N}$                                   | 3.04  | 75.47   | 669.5 | exergonic  |
| Fe-R183 | $\text{Fe}_8\text{N} + \text{N}_2 = \text{Fe}_8\text{N}_3$                                   | 6.08  | -103.97 | 366.5 | exergonic  |
| Fe-R184 | $2/7\text{Fe}_8\text{N} + \text{N}_2 = 16/7\text{FeN}$                                       | 21.28 | -121.25 | 515.3 | exergonic  |
| Fe-R185 | $2/15\text{Fe}_8\text{N} + \text{N}_2 = 16/15\text{FeN}_2$                                   | 45.6  | -       | -     | -          |
| Fe-R186 | $6\text{Fe}_8\text{N}_3 + \text{N}_2 = 4\text{Fe}_{12}\text{N}_5$                            | 0.96  | -       | -     | -          |
| Fe-R187 | $3\text{Fe}_8\text{N}_3 + \text{N}_2 = \text{Fe}_{24}\text{N}_{11}$                          | 1.91  | -       | -     | -          |
| Fe-R188 | $2\text{Fe}_8\text{N}_3 + \text{N}_2 = 8\text{Fe}_2\text{N}$                                 | 2.87  | 297.64  | -     | endergonic |
| Fe-R189 | $2/5\text{Fe}_8\text{N}_3 + \text{N}_2 = 16/5\text{FeN}$                                     | 14.33 | -128.17 | 580.2 | exergonic  |
| Fe-R190 | $2/13\text{Fe}_8\text{N}_3 + \text{N}_2 = 16/13\text{FeN}_2$                                 | 37.25 | -       | -     | -          |
| Fe-R191 | $24/5\text{FeH} + \text{N}_2 = 2/5\text{Fe}_{12}\text{N}_5 + 12/5\text{H}_2$                 | 8.49  | -       | -     | -          |
| Fe-R192 | $48/11\text{FeH} + \text{N}_2 = 2/11\text{Fe}_{24}\text{N}_{11} + 24/11\text{H}_2$           | 9.52  | -       | -     | -          |

|         |                                                                                       |       |          |       |           |
|---------|---------------------------------------------------------------------------------------|-------|----------|-------|-----------|
| Fe-R193 | $4\text{FeH} + \text{N}_2 = 2\text{Fe}_2\text{N} + 2\text{H}_2$                       | 10.55 | 44.36    | 61.6  | exergonic |
| Fe-R194 | $6\text{FeH} + \text{N}_2 = 2\text{Fe}_3\text{N} + 3\text{H}_2$                       | 6.44  | -43.93   | -     | exergonic |
| Fe-R195 | $8\text{FeH} + \text{N}_2 = 2\text{Fe}_4\text{N} + 4\text{H}_2$                       | 4.39  | 81.6     | -     | exergonic |
| Fe-R196 | $16\text{FeH} + \text{N}_2 = 2\text{Fe}_8\text{N} + 8\text{H}_2$                      | 1.31  | 87.73    | -     | exergonic |
| Fe-R197 | $16/3\text{FeH} + \text{N}_2 = 2/3\text{Fe}_8\text{N}_3 + 8/3\text{H}_2$              | 7.47  | -40.07   | -     | exergonic |
| Fe-R198 | $2\text{FeH} + \text{N}_2 = 2\text{FeN} + \text{H}_2$                                 | 22.86 | -95.13   | -     | exergonic |
| Fe-R199 | $\text{FeH} + \text{N}_2 = \text{FeN}_2 + 1/2\text{H}_2$                              | 47.5  | -        | -     | -         |
| Fe-R200 | $6\text{FeH} + \text{N}_2 = 6\text{Fe} + 2\text{NH}_3$                                | -1.77 | -13.96   | -     | exergonic |
| Fe-R201 | $9\text{FeH} + \text{N}_2 = 3\text{Fe}_3\text{H} + 2\text{NH}_3$                      | -1.18 | -        | -     | -         |
| Fe-R202 | $8/3\text{FeH} + \text{N}_2 = 2/9\text{Fe}_{12}\text{N}_5 + 8/9\text{NH}_3$           | 8.49  | -        | -     | -         |
| Fe-R203 | $48/19\text{FeH} + \text{N}_2 = 2/19\text{Fe}_{24}\text{N}_{11} + 16/19\text{NH}_3$   | 9.52  | -        | -     | -         |
| Fe-R204 | $12/5\text{FeH} + \text{N}_2 = 6/5\text{Fe}_2\text{N} + 4/5\text{NH}_3$               | 10.55 | -10.1    | -     | exergonic |
| Fe-R205 | $3\text{FeH} + \text{N}_2 = \text{Fe}_3\text{N} + \text{NH}_3$                        | 6.44  | -67.86   | 732.7 | exergonic |
| Fe-R206 | $24/7\text{FeH} + \text{N}_2 = 6/7\text{Fe}_4\text{N} + 8/7\text{NH}_3$               | 4.39  | -17.48   | -     | exergonic |
| Fe-R207 | $48/11\text{FeH} + \text{N}_2 = 6/11\text{Fe}_8\text{N} + 16/11\text{NH}_3$           | 1.31  | -42.83   | -     | exergonic |
| Fe-R208 | $48/17\text{FeH} + \text{N}_2 = 6/17\text{Fe}_8\text{N}_3 + 16/17\text{NH}_3$         | 7.47  | -64.41   | -     | exergonic |
| Fe-R209 | $3/2\text{FeH} + \text{N}_2 = 3/2\text{FeN} + 1/2\text{NH}_3$                         | 22.86 | -94.3    | 732.1 | exergonic |
| Fe-R210 | $6/7\text{FeH} + \text{N}_2 = 6/7\text{FeN}_2 + 2/7\text{NH}_3$                       | 47.5  | -        | -     | -         |
| Fe-R211 | $24/5\text{FeH}_3 + \text{N}_2 = 2/5\text{Fe}_{12}\text{N}_5 + 36/5\text{H}_2$        | 4.78  | -        | -     | -         |
| Fe-R212 | $48/11\text{FeH}_3 + \text{N}_2 = 2/11\text{Fe}_{24}\text{N}_{11} + 72/11\text{H}_2$  | 5.77  | -        | -     | -         |
| Fe-R213 | $4\text{FeH}_3 + \text{N}_2 = 2\text{Fe}_2\text{N} + 6\text{H}_2$                     | 6.76  | -237.59  | -     | exergonic |
| Fe-R214 | $6\text{FeH}_3 + \text{N}_2 = 2\text{Fe}_3\text{N} + 9\text{H}_2$                     | 2.79  | -466.84  | -     | exergonic |
| Fe-R215 | $8\text{FeH}_3 + \text{N}_2 = 2\text{Fe}_4\text{N} + 12\text{H}_2$                    | 0.81  | -482.29  | -     | exergonic |
| Fe-R216 | $16\text{FeH}_3 + \text{N}_2 = 2\text{Fe}_8\text{N} + 24\text{H}_2$                   | -2.16 | -1040.04 | -     | exergonic |
| Fe-R217 | $16/3\text{FeH}_3 + \text{N}_2 = 2/3\text{Fe}_8\text{N}_3 + 8\text{H}_2$              | 3.79  | -416     | -     | exergonic |
| Fe-R218 | $2\text{FeH}_3 + \text{N}_2 = 2\text{FeN} + 3\text{H}_2$                              | 18.66 | -236.1   | -     | exergonic |
| Fe-R219 | $\text{FeH}_3 + \text{N}_2 = \text{FeN}_2 + 3/2\text{H}_2$                            | 42.45 | -        | -     | -         |
| Fe-R220 | $2\text{FeH}_3 + \text{N}_2 = 2\text{Fe} + 2\text{NH}_3$                              | -5.14 | -206.82  | -     | exergonic |
| Fe-R221 | $9/4\text{FeH}_3 + \text{N}_2 = 3/4\text{Fe}_3\text{H} + 2\text{NH}_3$                | -4.57 | -        | -     | -         |
| Fe-R222 | $3\text{FeH}_3 + \text{N}_2 = 3\text{FeH} + 2\text{NH}_3$                             | -3.42 | -303.25  | -     | exergonic |
| Fe-R223 | $24/17\text{FeH}_3 + \text{N}_2 = 2/17\text{Fe}_{12}\text{N}_5 + 24/17\text{NH}_3$    | 4.78  | -        | -     | -         |
| Fe-R224 | $48/35\text{FeH}_3 + \text{N}_2 = 2/35\text{Fe}_{24}\text{N}_{11} + 48/35\text{NH}_3$ | 5.77  | -        | -     | -         |
| Fe-R225 | $4/3\text{FeH}_3 + \text{N}_2 = 2/3\text{Fe}_2\text{N} + 4/3\text{NH}_3$              | 6.76  | -140.39  | -     | exergonic |
| Fe-R226 | $3/2\text{FeH}_3 + \text{N}_2 = 1/2\text{Fe}_3\text{N} + 3/2\text{NH}_3$              | 2.79  | -185.55  | -     | exergonic |
| Fe-R227 | $8/5\text{FeH}_3 + \text{N}_2 = 2/5\text{Fe}_4\text{N} + 8/5\text{NH}_3$              | 0.81  | -169.89  | -     | exergonic |
| Fe-R228 | $16/9\text{FeH}_3 + \text{N}_2 = 2/9\text{Fe}_8\text{N} + 16/9\text{NH}_3$            | -2.16 | -197.15  | -     | exergonic |
| Fe-R229 | $16/11\text{FeH}_3 + \text{N}_2 = 2/11\text{Fe}_8\text{N}_3 + 16/11\text{NH}_3$       | 3.79  | -180.21  | -     | exergonic |
| Fe-R230 | $\text{FeH}_3 + \text{N}_2 = \text{FeN} + \text{NH}_3$                                | 18.66 | -163.95  | -     | exergonic |
| Fe-R231 | $2/3\text{FeH}_3 + \text{N}_2 = 2/3\text{FeN}_2 + 2/3\text{NH}_3$                     | 42.45 | -        | -     | -         |
| Fe-R232 | $24/5\text{FeH}_4 + \text{N}_2 = 2/5\text{Fe}_{12}\text{N}_5 + 48/5\text{H}_2$        | 3.01  | -        | -     | -         |
| Fe-R233 | $48/11\text{FeH}_4 + \text{N}_2 = 2/11\text{Fe}_{24}\text{N}_{11} + 96/11\text{H}_2$  | 3.99  | -        | -     | -         |
| Fe-R234 | $4\text{FeH}_4 + \text{N}_2 = 2\text{Fe}_2\text{N} + 8\text{H}_2$                     | 4.96  | -        | -     | -         |
| Fe-R235 | $6\text{FeH}_4 + \text{N}_2 = 2\text{Fe}_3\text{N} + 12\text{H}_2$                    | 1.06  | -        | -     | -         |
| Fe-R236 | $8\text{FeH}_4 + \text{N}_2 = 2\text{Fe}_4\text{N} + 16\text{H}_2$                    | -0.89 | -        | -     | -         |
| Fe-R237 | $16\text{FeH}_4 + \text{N}_2 = 2\text{Fe}_8\text{N} + 32\text{H}_2$                   | -3.81 | -        | -     | -         |
| Fe-R238 | $16/3\text{FeH}_4 + \text{N}_2 = 2/3\text{Fe}_8\text{N}_3 + 32/3\text{H}_2$           | 2.04  | -        | -     | -         |
| Fe-R239 | $2\text{FeH}_4 + \text{N}_2 = 2\text{FeN} + 4\text{H}_2$                              | 16.66 | -        | -     | -         |
| Fe-R240 | $\text{FeH}_4 + \text{N}_2 = \text{FeN}_2 + 2\text{H}_2$                              | 40.05 | -        | -     | -         |
| Fe-R241 | $3/2\text{FeH}_4 + \text{N}_2 = 3/2\text{Fe} + 2\text{NH}_3$                          | -6.73 | -        | -     | -         |

|         |                                                                                       |       |   |   |   |
|---------|---------------------------------------------------------------------------------------|-------|---|---|---|
| Fe-R242 | $18/11\text{FeH}_4 + \text{N}_2 = 6/11\text{Fe}_3\text{H} + 2\text{NH}_3$             | -6.17 | - | - | - |
| Fe-R243 | $2\text{FeH}_4 + \text{N}_2 = 2\text{FeH} + 2\text{NH}_3$                             | -5.05 | - | - | - |
| Fe-R244 | $6\text{FeH}_4 + \text{N}_2 = 6\text{FeH}_3 + 2\text{NH}_3$                           | -1.68 | - | - | - |
| Fe-R245 | $8/7\text{FeH}_4 + \text{N}_2 = 2/21\text{Fe}_{12}\text{N}_5 + 32/21\text{NH}_3$      | 3.01  | - | - | - |
| Fe-R246 | $48/43\text{FeH}_4 + \text{N}_2 = 2/43\text{Fe}_{24}\text{N}_{11} + 64/43\text{NH}_3$ | 3.99  | - | - | - |
| Fe-R247 | $12/11\text{FeH}_4 + \text{N}_2 = 6/11\text{Fe}_2\text{N} + 16/11\text{NH}_3$         | 4.96  | - | - | - |
| Fe-R248 | $6/5\text{FeH}_4 + \text{N}_2 = 2/5\text{Fe}_3\text{N} + 8/5\text{NH}_3$              | 1.06  | - | - | - |
| Fe-R249 | $24/19\text{FeH}_4 + \text{N}_2 = 6/19\text{Fe}_4\text{N} + 32/19\text{NH}_3$         | -0.89 | - | - | - |
| Fe-R250 | $48/35\text{FeH}_4 + \text{N}_2 = 6/35\text{Fe}_8\text{N} + 64/35\text{NH}_3$         | -3.81 | - | - | - |
| Fe-R251 | $48/41\text{FeH}_4 + \text{N}_2 = 6/41\text{Fe}_8\text{N}_3 + 64/41\text{NH}_3$       | 2.04  | - | - | - |
| Fe-R252 | $6/7\text{FeH}_4 + \text{N}_2 = 6/7\text{FeN} + 8/7\text{NH}_3$                       | 16.66 | - | - | - |
| Fe-R253 | $3/5\text{FeH}_4 + \text{N}_2 = 3/5\text{FeN}_2 + 4/5\text{NH}_3$                     | 40.05 | - | - | - |
| Fe-R254 | $2\text{FeN} + \text{N}_2 = 2\text{FeN}_2$                                            | 20.05 | - | - | - |

Table S20: The Li-based system

| ID      | Reaction                                                                                          | dm_stoich [%] | h298 [kJ/mol] | T_eq [°C] | Type      |
|---------|---------------------------------------------------------------------------------------------------|---------------|---------------|-----------|-----------|
| Li-R001 | $2\text{Li} + \text{H}_2 = 2\text{LiH}$                                                           | 14.52         | -181.08       | -         | exergonic |
| Li-R002 | $2\text{Li}(\text{H}_3\text{N})_4 + \text{H}_2 = 2\text{LiH} + 8\text{NH}_3$                      | -89.41        | -             | -         | -         |
| Li-R003 | $1/3\text{Li}_{15}\text{H}_9\text{N}_8 + \text{H}_2 = 5\text{LiH} + 4/3\text{N}_2$                | -47.07        | -             | -         | -         |
| Li-R004 | $2/15\text{Li}_{15}\text{H}_9\text{N}_8 + \text{H}_2 = 2\text{Li} + 16/15\text{NH}_3$             | -53.78        | -             | -         | -         |
| Li-R005 | $1/15\text{Li}_{15}\text{H}_9\text{N}_8 + \text{H}_2 = \text{LiH} + 8/15\text{NH}_3$              | -47.07        | -             | -         | -         |
| Li-R006 | $4/15\text{Li}_{15}\text{H}_9\text{N}_8 + \text{H}_2 = \text{Li}_4\text{HN} + 17/15\text{NH}_3$   | -28.78        | -             | -         | -         |
| Li-R007 | $2\text{Li}_2\text{HN} + \text{H}_2 = 4\text{LiH} + \text{N}_2$                                   | -44.99        | -             | -         | -         |
| Li-R008 | $\text{Li}_2\text{HN} + \text{H}_2 = 2\text{Li} + \text{NH}_3$                                    | -51.96        | -             | -         | -         |
| Li-R009 | $1/2\text{Li}_2\text{HN} + \text{H}_2 = \text{LiH} + 1/2\text{NH}_3$                              | -44.99        | -             | -         | -         |
| Li-R010 | $2\text{Li}_2\text{HN} + \text{H}_2 = \text{Li}_4\text{HN} + \text{NH}_3$                         | -25.98        | -             | -         | -         |
| Li-R011 | $\text{Li}_2\text{N} + \text{H}_2 = 2\text{LiH} + 1/2\text{N}_2$                                  | -43           | -             | -         | -         |
| Li-R012 | $2\text{Li}_2\text{N} + \text{H}_2 = 2\text{Li}_2\text{HN}$                                       | 3.61          | -             | -         | -         |
| Li-R013 | $4\text{Li}_2\text{N} + \text{H}_2 = 2\text{Li}_4\text{HN} + \text{N}_2$                          | -23.31        | -             | -         | -         |
| Li-R014 | $2/3\text{Li}_2\text{N} + \text{H}_2 = 4/3\text{Li} + 2/3\text{NH}_3$                             | -50.23        | -             | -         | -         |
| Li-R015 | $2/5\text{Li}_2\text{N} + \text{H}_2 = 4/5\text{LiH} + 2/5\text{NH}_3$                            | -43           | -             | -         | -         |
| Li-R016 | $\text{Li}_2\text{N} + \text{H}_2 = 1/2\text{Li}_4\text{HN} + 1/2\text{NH}_3$                     | -23.31        | -             | -         | -         |
| Li-R017 | $2\text{Li}_2\text{N} + \text{H}_2 = 4/3\text{Li}_3\text{N} + 2/3\text{NH}_3$                     | -16.74        | -             | -         | -         |
| Li-R018 | $2\text{Li}_3(\text{HN})_2 + \text{H}_2 = 6\text{LiH} + 2\text{N}_2$                              | -53.11        | -             | -         | -         |
| Li-R019 | $2\text{Li}_3(\text{HN})_2 + \text{H}_2 = 2\text{Li}_3\text{H}_3\text{N}_2$                       | 1.98          | -             | -         | -         |
| Li-R020 | $14\text{Li}_3(\text{HN})_2 + \text{H}_2 = 6\text{Li}_7\text{H}_5\text{N}_4 + 2\text{N}_2$        | -7.59         | -             | -         | -         |
| Li-R021 | $1/2\text{Li}_3(\text{HN})_2 + \text{H}_2 = 3/2\text{Li} + \text{NH}_3$                           | -59.06        | -             | -         | -         |
| Li-R022 | $2/7\text{Li}_3(\text{HN})_2 + \text{H}_2 = 6/7\text{LiH} + 4/7\text{NH}_3$                       | -53.11        | -             | -         | -         |
| Li-R023 | $2\text{Li}_3(\text{HN})_2 + \text{H}_2 = 2/5\text{Li}_{15}\text{H}_9\text{N}_8 + 4/5\text{NH}_3$ | -11.41        | -             | -         | -         |
| Li-     | $2\text{Li}_3(\text{HN})_2 + \text{H}_2 = 3\text{Li}_2\text{HN} + \text{NH}_3$                    | -14.76        | -             | -         | -         |

|         |                                                                                                    |        |        |       |            |
|---------|----------------------------------------------------------------------------------------------------|--------|--------|-------|------------|
| R024    |                                                                                                    |        |        |       |            |
| Li-R025 | $4/5\text{Li}_3(\text{HN})_2 + \text{H}_2 = 3/5\text{Li}_4\text{HN} + \text{NH}_3$                 | -36.91 | -      | -     | -          |
| Li-R026 | $2\text{Li}_3(\text{HN})_2 + \text{H}_2 = 6/7\text{Li}_7\text{H}_5\text{N}_4 + 4/7\text{NH}_3$     | -7.59  | -      | -     | -          |
| Li-R027 | $2\text{Li}_3(\text{HN})_2 + \text{H}_2 = 2\text{Li}_3\text{N} + 2\text{NH}_3$                     | -31.51 | -      | -     | -          |
| Li-R028 | $2/3\text{Li}_3\text{H}_3\text{N}_2 + \text{H}_2 = 2\text{Li} + 4/3\text{NH}_3$                    | -59.85 | -      | -     | -          |
| Li-R029 | $1/3\text{Li}_3\text{H}_3\text{N}_2 + \text{H}_2 = \text{LiH} + 2/3\text{NH}_3$                    | -54.02 | -      | -     | -          |
| Li-R030 | $4/3\text{Li}_3\text{H}_3\text{N}_2 + \text{H}_2 = \text{Li}_4\text{HN} + 5/3\text{NH}_3$          | -38.14 | -      | -     | -          |
| Li-R031 | $2/3\text{Li}_3\text{N} + \text{H}_2 = 2\text{LiH} + 1/3\text{N}_2$                                | -31.54 | -71.38 | -     | exergonic  |
| Li-R032 | $8/3\text{Li}_3\text{N} + \text{H}_2 = 2\text{Li}_4\text{HN} + 1/3\text{N}_2$                      | -7.88  | -      | -     | -          |
| Li-R033 | $2/3\text{Li}_3\text{N} + \text{H}_2 = 2\text{Li} + 2/3\text{NH}_3$                                | -40.22 | 79.11  | -     | endergonic |
| Li-R034 | $1/3\text{Li}_3\text{N} + \text{H}_2 = \text{LiH} + 1/3\text{NH}_3$                                | -31.54 | -50.99 | 454.2 | exergonic  |
| Li-R035 | $4/3\text{Li}_3\text{N} + \text{H}_2 = \text{Li}_4\text{HN} + 1/3\text{NH}_3$                      | -7.88  | -      | -     | -          |
| Li-R036 | $2/3\text{Li}_3\text{N}_2 + \text{H}_2 = 2\text{LiH} + 2/3\text{N}_2$                              | -51.17 | -      | -     | -          |
| Li-R037 | $10/9\text{Li}_3\text{N}_2 + \text{H}_2 = 2/9\text{Li}_{15}\text{H}_9\text{N}_8 + 2/9\text{N}_2$   | -7.76  | -      | -     | -          |
| Li-R038 | $4/3\text{Li}_3\text{N}_2 + \text{H}_2 = 2\text{Li}_2\text{HN} + 1/3\text{N}_2$                    | -11.25 | -      | -     | -          |
| Li-R039 | $\text{Li}_3\text{N}_2 + \text{H}_2 = \text{Li}_3(\text{HN})_2$                                    | 4.13   | -      | -     | -          |
| Li-R040 | $2/3\text{Li}_3\text{N}_2 + \text{H}_2 = 2/3\text{Li}_3\text{H}_3\text{N}_2$                       | 6.19   | -      | -     | -          |
| Li-R041 | $8/3\text{Li}_3\text{N}_2 + \text{H}_2 = 2\text{Li}_4\text{HN} + 5/3\text{N}_2$                    | -34.31 | -      | -     | -          |
| Li-R042 | $14/15\text{Li}_3\text{N}_2 + \text{H}_2 = 2/5\text{Li}_7\text{H}_5\text{N}_4 + 2/15\text{N}_2$    | -3.77  | -      | -     | -          |
| Li-R043 | $1/3\text{Li}_3\text{N}_2 + \text{H}_2 = \text{Li} + 2/3\text{NH}_3$                               | -57.37 | -      | -     | -          |
| Li-R044 | $2/9\text{Li}_3\text{N}_2 + \text{H}_2 = 2/3\text{LiH} + 4/9\text{NH}_3$                           | -51.17 | -      | -     | -          |
| Li-R045 | $2/3\text{Li}_3\text{N}_2 + \text{H}_2 = 2/15\text{Li}_{15}\text{H}_9\text{N}_8 + 4/15\text{NH}_3$ | -7.76  | -      | -     | -          |
| Li-R046 | $2/3\text{Li}_3\text{N}_2 + \text{H}_2 = \text{Li}_2\text{HN} + 1/3\text{NH}_3$                    | -11.25 | -      | -     | -          |
| Li-R047 | $4/9\text{Li}_3\text{N}_2 + \text{H}_2 = 1/3\text{Li}_4\text{HN} + 5/9\text{NH}_3$                 | -34.31 | -      | -     | -          |
| Li-R048 | $2/3\text{Li}_3\text{N}_2 + \text{H}_2 = 2/7\text{Li}_7\text{H}_5\text{N}_4 + 4/21\text{NH}_3$     | -3.77  | -      | -     | -          |
| Li-R049 | $4/3\text{Li}_3\text{N}_2 + \text{H}_2 = 2\text{Li}_2\text{N} + 2/3\text{NH}_3$                    | -14.34 | -      | -     | -          |
| Li-R050 | $2/3\text{Li}_3\text{N}_2 + \text{H}_2 = 2/3\text{Li}_3\text{N} + 2/3\text{NH}_3$                  | -28.68 | -      | -     | -          |
| Li-R051 | $2/3\text{Li}_4\text{HN} + \text{H}_2 = 8/3\text{LiH} + 1/3\text{N}_2$                             | -25.68 | -      | -     | -          |
| Li-R052 | $\text{Li}_4\text{HN} + \text{H}_2 = 4\text{Li} + \text{NH}_3$                                     | -35.1  | -      | -     | -          |
| Li-R053 | $1/3\text{Li}_4\text{HN} + \text{H}_2 = 4/3\text{LiH} + 1/3\text{NH}_3$                            | -25.68 | -      | -     | -          |
| Li-R054 | $\text{Li}_7\text{H}_5\text{N}_4 + \text{H}_2 = 7\text{LiH} + 2\text{N}_2$                         | -49.26 | -      | -     | -          |
| Li-R055 | $2/7\text{Li}_7\text{H}_5\text{N}_4 + \text{H}_2 = 2\text{Li} + 8/7\text{NH}_3$                    | -55.69 | -      | -     | -          |
| Li-R056 | $1/7\text{Li}_7\text{H}_5\text{N}_4 + \text{H}_2 = \text{LiH} + 4/7\text{NH}_3$                    | -49.26 | -      | -     | -          |
| Li-R057 | $4/7\text{Li}_7\text{H}_5\text{N}_4 + \text{H}_2 = \text{Li}_4\text{HN} + 9/7\text{NH}_3$          | -31.73 | -      | -     | -          |
| Li-R058 | $2\text{LiH}_2\text{N} + \text{H}_2 = 2\text{Li} + 2\text{NH}_3$                                   | -69.78 | 364.01 | -     | endergonic |
| Li-R059 | $\text{LiH}_2\text{N} + \text{H}_2 = \text{LiH} + \text{NH}_3$                                     | -65.39 | 91.47  | -     | endergonic |

|         |                                                                                            |        |         |       |           |
|---------|--------------------------------------------------------------------------------------------|--------|---------|-------|-----------|
| Li-R060 | $4\text{LiH}_2\text{N} + \text{H}_2 = \text{Li}_4\text{HN} + 3\text{NH}_3$                 | -53.43 | -       | -     | -         |
| Li-R061 | $2\text{LiN} + \text{H}_2 = 2\text{LiH} + \text{N}_2$                                      | -62.06 | -       | -     | -         |
| Li-R062 | $10/3\text{LiN} + \text{H}_2 = 2/9\text{Li}_{15}\text{H}_9\text{N}_8 + 7/9\text{N}_2$      | -28.32 | -       | -     | -         |
| Li-R063 | $4\text{LiN} + \text{H}_2 = 2\text{Li}_2\text{HN} + \text{N}_2$                            | -31.03 | -       | -     | -         |
| Li-R064 | $3\text{LiN} + \text{H}_2 = \text{Li}_3(\text{HN})_2 + 1/2\text{N}_2$                      | -19.08 | -       | -     | -         |
| Li-R065 | $2\text{LiN} + \text{H}_2 = 2/3\text{Li}_3\text{H}_3\text{N}_2 + 1/3\text{N}_2$            | -17.48 | -       | -     | -         |
| Li-R066 | $8\text{LiN} + \text{H}_2 = 2\text{Li}_4\text{HN} + 3\text{N}_2$                           | -48.95 | -       | -     | -         |
| Li-R067 | $14/5\text{LiN} + \text{H}_2 = 2/5\text{Li}_7\text{H}_5\text{N}_4 + 3/5\text{N}_2$         | -25.22 | -       | -     | -         |
| Li-R068 | $\text{LiN} + \text{H}_2 = \text{LiH}_2\text{N}$                                           | 9.62   | -       | -     | -         |
| Li-R069 | $2/3\text{LiN} + \text{H}_2 = 2/3\text{Li} + 2/3\text{NH}_3$                               | -66.87 | -       | -     | -         |
| Li-R070 | $1/2\text{LiN} + \text{H}_2 = 1/2\text{LiH} + 1/2\text{NH}_3$                              | -62.06 | -       | -     | -         |
| Li-R071 | $\text{LiN} + \text{H}_2 = 1/15\text{Li}_{15}\text{H}_9\text{N}_8 + 7/15\text{NH}_3$       | -28.32 | -       | -     | -         |
| Li-R072 | $\text{LiN} + \text{H}_2 = 1/2\text{Li}_2\text{HN} + 1/2\text{NH}_3$                       | -31.03 | -       | -     | -         |
| Li-R073 | $6/5\text{LiN} + \text{H}_2 = 2/5\text{Li}_3(\text{HN})_2 + 2/5\text{NH}_3$                | -19.08 | -       | -     | -         |
| Li-R074 | $\text{LiN} + \text{H}_2 = 1/3\text{Li}_3\text{H}_3\text{N}_2 + 1/3\text{NH}_3$            | -17.48 | -       | -     | -         |
| Li-R075 | $4/5\text{LiN} + \text{H}_2 = 1/5\text{Li}_4\text{HN} + 3/5\text{NH}_3$                    | -48.95 | -       | -     | -         |
| Li-R076 | $\text{LiN} + \text{H}_2 = 1/7\text{Li}_7\text{H}_5\text{N}_4 + 3/7\text{NH}_3$            | -25.22 | -       | -     | -         |
| Li-R077 | $4/3\text{LiN} + \text{H}_2 = 2/3\text{Li}_2\text{N} + 2/3\text{NH}_3$                     | -33.43 | -       | -     | -         |
| Li-R078 | $\text{LiN} + \text{H}_2 = 1/3\text{Li}_3\text{N} + 2/3\text{NH}_3$                        | -44.58 | -       | -     | -         |
| Li-R079 | $2\text{LiN} + \text{H}_2 = 2/3\text{Li}_3\text{N}_2 + 2/3\text{NH}_3$                     | -22.29 | -       | -     | -         |
| Li-R080 | $2\text{LiN}_3 + \text{H}_2 = 2\text{LiH} + 3\text{N}_2$                                   | -83.77 | -22.23  | -     | exergonic |
| Li-R081 | $10/3\text{LiN}_3 + \text{H}_2 = 2/9\text{Li}_{15}\text{H}_9\text{N}_8 + 37/9\text{N}_2$   | -69.33 | -       | -     | -         |
| Li-R082 | $4\text{LiN}_3 + \text{H}_2 = 2\text{Li}_2\text{HN} + 5\text{N}_2$                         | -70.49 | -       | -     | -         |
| Li-R083 | $3\text{LiN}_3 + \text{H}_2 = \text{Li}_3(\text{HN})_2 + 7/2\text{N}_2$                    | -65.38 | -       | -     | -         |
| Li-R084 | $2\text{LiN}_3 + \text{H}_2 = 2/3\text{Li}_3\text{H}_3\text{N}_2 + 7/3\text{N}_2$          | -64.69 | -       | -     | -         |
| Li-R085 | $8\text{LiN}_3 + \text{H}_2 = 2\text{Li}_4\text{HN} + 11\text{N}_2$                        | -78.16 | -       | -     | -         |
| Li-R086 | $14/5\text{LiN}_3 + \text{H}_2 = 2/5\text{Li}_7\text{H}_5\text{N}_4 + 17/5\text{N}_2$      | -68.01 | -       | -     | -         |
| Li-R087 | $\text{LiN}_3 + \text{H}_2 = \text{LiH}_2\text{N} + \text{N}_2$                            | -53.1  | -148.48 | -     | exergonic |
| Li-R088 | $2/9\text{LiN}_3 + \text{H}_2 = 2/9\text{Li} + 2/3\text{NH}_3$                             | -85.83 | -12.95  | 371   | exergonic |
| Li-R089 | $1/5\text{LiN}_3 + \text{H}_2 = 1/5\text{LiH} + 3/5\text{NH}_3$                            | -83.77 | -29.76  | 557.2 | exergonic |
| Li-R090 | $1/4\text{LiN}_3 + \text{H}_2 = 1/60\text{Li}_{15}\text{H}_9\text{N}_8 + 37/60\text{NH}_3$ | -69.33 | -       | -     | -         |
| Li-R091 | $1/4\text{LiN}_3 + \text{H}_2 = 1/8\text{Li}_2\text{HN} + 5/8\text{NH}_3$                  | -70.49 | -       | -     | -         |
| Li-R092 | $6/23\text{LiN}_3 + \text{H}_2 = 2/23\text{Li}_3(\text{HN})_2 + 14/23\text{NH}_3$          | -65.38 | -       | -     | -         |
| Li-R093 | $1/4\text{LiN}_3 + \text{H}_2 = 1/12\text{Li}_3\text{H}_3\text{N}_2 + 7/12\text{NH}_3$     | -64.69 | -       | -     | -         |
| Li-R094 | $4/17\text{LiN}_3 + \text{H}_2 = 1/17\text{Li}_4\text{HN} + 11/17\text{NH}_3$              | -78.16 | -       | -     | -         |
| Li-R095 | $1/4\text{LiN}_3 + \text{H}_2 = 1/28\text{Li}_7\text{H}_5\text{N}_4 + 17/28\text{NH}_3$    | -68.01 | -       | -     | -         |



|         |                                                                                                            |        |         |       |           |
|---------|------------------------------------------------------------------------------------------------------------|--------|---------|-------|-----------|
| Li-R096 | $1/4\text{LiN}_3 + \text{H}_2 = 1/4\text{LiH}_2\text{N} + 1/2\text{NH}_3$                                  | -53.1  | -60.07  | -     | exergonic |
| Li-R097 | $4/15\text{LiN}_3 + \text{H}_2 = 2/15\text{Li}_2\text{N} + 2/3\text{NH}_3$                                 | -71.52 | -       | -     | -         |
| Li-R098 | $1/4\text{LiN}_3 + \text{H}_2 = 1/12\text{Li}_3\text{N} + 2/3\text{NH}_3$                                  | -76.29 | -24.45  | 608.4 | exergonic |
| Li-R099 | $2/7\text{LiN}_3 + \text{H}_2 = 2/21\text{Li}_3\text{N}_2 + 2/3\text{NH}_3$                                | -66.75 | -       | -     | -         |
| Li-R100 | $1/3\text{LiN}_3 + \text{H}_2 = 1/3\text{LiN} + 2/3\text{NH}_3$                                            | -57.22 | -       | -     | -         |
| Li-R101 | $4\text{Li} + \text{N}_2 = 2\text{Li}_2\text{N}$                                                           | 100.91 | -       | -     | -         |
| Li-R102 | $6\text{Li} + \text{N}_2 = 2\text{Li}_3\text{N}$                                                           | 67.28  | -329.11 | -     | exergonic |
| Li-R103 | $3\text{Li} + \text{N}_2 = \text{Li}_3\text{N}_2$                                                          | 134.55 | -       | -     | -         |
| Li-R104 | $2\text{Li} + \text{N}_2 = 2\text{LiN}$                                                                    | 201.83 | -       | -     | -         |
| Li-R105 | $2/3\text{Li} + \text{N}_2 = 2/3\text{LiN}_3$                                                              | 605.49 | -52.95  | 82.9  | exergonic |
| Li-R106 | $6\text{Li}(\text{H}_3\text{N})_4 + \text{N}_2 = 2/5\text{Li}_{15}\text{H}_9\text{N}_8 + 114/5\text{NH}_3$ | -80    | -       | -     | -         |
| Li-R107 | $6\text{Li}(\text{H}_3\text{N})_4 + \text{N}_2 = 3\text{Li}_2\text{HN} + 23\text{NH}_3$                    | -80.75 | -       | -     | -         |
| Li-R108 | $9/2\text{Li}(\text{H}_3\text{N})_4 + \text{N}_2 = 3/2\text{Li}_3(\text{HN})_2 + 17\text{NH}_3$            | -77.42 | -       | -     | -         |
| Li-R109 | $6\text{Li}(\text{H}_3\text{N})_4 + \text{N}_2 = 2\text{Li}_3\text{H}_3\text{N}_2 + 22\text{NH}_3$         | -76.97 | -       | -     | -         |
| Li-R110 | $12\text{Li}(\text{H}_3\text{N})_4 + \text{N}_2 = 3\text{Li}_4\text{HN} + 47\text{NH}_3$                   | -85.75 | -       | -     | -         |
| Li-R111 | $6\text{Li}(\text{H}_3\text{N})_4 + \text{N}_2 = 6/7\text{Li}_7\text{H}_5\text{N}_4 + 158/7\text{NH}_3$    | -79.13 | -       | -     | -         |
| Li-R112 | $6\text{Li}(\text{H}_3\text{N})_4 + \text{N}_2 = 6\text{LiH}_2\text{N} + 20\text{NH}_3$                    | -69.41 | -       | -     | -         |
| Li-R113 | $4\text{Li}(\text{H}_3\text{N})_4 + \text{N}_2 = 2\text{Li}_2\text{N} + 16\text{NH}_3$                     | -81.42 | -       | -     | -         |
| Li-R114 | $6\text{Li}(\text{H}_3\text{N})_4 + \text{N}_2 = 2\text{Li}_3\text{N} + 24\text{NH}_3$                     | -84.53 | -       | -     | -         |
| Li-R115 | $3\text{Li}(\text{H}_3\text{N})_4 + \text{N}_2 = \text{Li}_3\text{N}_2 + 12\text{NH}_3$                    | -78.31 | -       | -     | -         |
| Li-R116 | $2\text{Li}(\text{H}_3\text{N})_4 + \text{N}_2 = 2\text{LiN} + 8\text{NH}_3$                               | -72.09 | -       | -     | -         |
| Li-R117 | $2/3\text{Li}(\text{H}_3\text{N})_4 + \text{N}_2 = 2/3\text{LiN}_3 + 8/3\text{NH}_3$                       | -34.77 | -       | -     | -         |
| Li-R118 | $\text{Li}_{15}\text{H}_9\text{N}_8 + \text{N}_2 = 5\text{Li}_3\text{N}_2 + 9/2\text{H}_2$                 | 8.41   | -       | -     | -         |
| Li-R119 | $2/7\text{Li}_{15}\text{H}_9\text{N}_8 + \text{N}_2 = 30/7\text{LiN} + 9/7\text{H}_2$                      | 39.51  | -       | -     | -         |
| Li-R120 | $2/37\text{Li}_{15}\text{H}_9\text{N}_8 + \text{N}_2 = 30/37\text{LiN}_3 + 9/37\text{H}_2$                 | 226.08 | -       | -     | -         |
| Li-R121 | $4/5\text{Li}_{15}\text{H}_9\text{N}_8 + \text{N}_2 = 6\text{Li}_2\text{N} + 12/5\text{NH}_3$              | -7.14  | -       | -     | -         |
| Li-R122 | $2/5\text{Li}_{15}\text{H}_9\text{N}_8 + \text{N}_2 = 2\text{Li}_3\text{N}_2 + 6/5\text{NH}_3$             | 8.41   | -       | -     | -         |
| Li-R123 | $1/5\text{Li}_{15}\text{H}_9\text{N}_8 + \text{N}_2 = 3\text{LiN} + 3/5\text{NH}_3$                        | 39.51  | -       | -     | -         |
| Li-R124 | $1/20\text{Li}_{15}\text{H}_9\text{N}_8 + \text{N}_2 = 3/4\text{LiN}_3 + 3/20\text{NH}_3$                  | 226.08 | -       | -     | -         |
| Li-R125 | $6\text{Li}_2\text{HN} + \text{N}_2 = 4\text{Li}_3\text{N}_2 + 3\text{H}_2$                                | 12.67  | -       | -     | -         |
| Li-R126 | $2\text{Li}_2\text{HN} + \text{N}_2 = 4\text{LiN} + \text{H}_2$                                            | 44.99  | -       | -     | -         |
| Li-R127 | $2/5\text{Li}_2\text{HN} + \text{N}_2 = 4/5\text{LiN}_3 + 1/5\text{H}_2$                                   | 238.89 | -       | -     | -         |
| Li-R128 | $6\text{Li}_2\text{HN} + \text{N}_2 = 6\text{Li}_2\text{N} + 2\text{NH}_3$                                 | -3.49  | -       | -     | -         |
| Li-R129 | $3\text{Li}_2\text{HN} + \text{N}_2 = 2\text{Li}_3\text{N}_2 + \text{NH}_3$                                | 12.67  | -       | -     | -         |
| Li-R130 | $3/2\text{Li}_2\text{HN} + \text{N}_2 = 3\text{LiN} + 1/2\text{NH}_3$                                      | 44.99  | -       | -     | -         |
| Li-R131 | $3/8\text{Li}_2\text{HN} + \text{N}_2 = 3/4\text{LiN}_3 + 1/8\text{NH}_3$                                  | 238.89 | -       | -     | -         |

|         |                                                                                             |        |        |   |            |
|---------|---------------------------------------------------------------------------------------------|--------|--------|---|------------|
| Li-R132 | $6\text{Li}_2\text{N} + \text{N}_2 = 4\text{Li}_3\text{N}_2$                                | 16.74  | -      | - | -          |
| Li-R133 | $2\text{Li}_2\text{N} + \text{N}_2 = 4\text{LiN}$                                           | 50.23  | -      | - | -          |
| Li-R134 | $2/5\text{Li}_2\text{N} + \text{N}_2 = 4/5\text{LiN}_3$                                     | 251.14 | -      | - | -          |
| Li-R135 | $2\text{Li}_3(\text{HN})_2 + \text{N}_2 = 6\text{LiN} + 2\text{H}_2$                        | 23.58  | -      | - | -          |
| Li-R136 | $2/7\text{Li}_3(\text{HN})_2 + \text{N}_2 = 6/7\text{LiN}_3 + 2/7\text{H}_2$                | 188.86 | -      | - | -          |
| Li-R137 | $12\text{Li}_3(\text{HN})_2 + \text{N}_2 = 18\text{Li}_2\text{N} + 8\text{NH}_3$            | -17.74 | -      | - | -          |
| Li-R138 | $3\text{Li}_3(\text{HN})_2 + \text{N}_2 = 3\text{Li}_3\text{N}_2 + 2\text{NH}_3$            | -3.96  | -      | - | -          |
| Li-R139 | $6/5\text{Li}_3(\text{HN})_2 + \text{N}_2 = 18/5\text{LiN} + 4/5\text{NH}_3$                | 23.58  | -      | - | -          |
| Li-R140 | $6/23\text{Li}_3(\text{HN})_2 + \text{N}_2 = 18/23\text{LiN}_3 + 4/23\text{NH}_3$           | 188.86 | -      | - | -          |
| Li-R141 | $2\text{Li}_3\text{H}_3\text{N}_2 + \text{N}_2 = 6\text{LiN} + 3\text{H}_2$                 | 21.18  | -      | - | -          |
| Li-R142 | $2/7\text{Li}_3\text{H}_3\text{N}_2 + \text{N}_2 = 6/7\text{LiN}_3 + 3/7\text{H}_2$         | 183.24 | -      | - | -          |
| Li-R143 | Improbable stoichiometric coefficients                                                      | -16.42 | -      | - | -          |
| Li-R144 | $6\text{Li}_3\text{H}_3\text{N}_2 + \text{N}_2 = 6\text{Li}_3(\text{HN})_2 + 2\text{NH}_3$  | -1.94  | -      | - | -          |
| Li-R145 | Improbable stoichiometric coefficients                                                      | -9.38  | -      | - | -          |
| Li-R146 | $4\text{Li}_3\text{H}_3\text{N}_2 + \text{N}_2 = 6\text{Li}_2\text{N} + 4\text{NH}_3$       | -19.34 | -      | - | -          |
| Li-R147 | $2\text{Li}_3\text{H}_3\text{N}_2 + \text{N}_2 = 2\text{Li}_3\text{N}_2 + 2\text{NH}_3$     | -5.83  | -      | - | -          |
| Li-R148 | $\text{Li}_3\text{H}_3\text{N}_2 + \text{N}_2 = 3\text{LiN} + \text{NH}_3$                  | 21.18  | -      | - | -          |
| Li-R149 | $1/4\text{Li}_3\text{H}_3\text{N}_2 + \text{N}_2 = 3/4\text{LiN}_3 + 1/4\text{NH}_3$        | 183.24 | -      | - | -          |
| Li-R150 | $4\text{Li}_3\text{N} + \text{N}_2 = 6\text{Li}_2\text{N}$                                  | 20.11  | -      | - | -          |
| Li-R151 | $2\text{Li}_3\text{N} + \text{N}_2 = 2\text{Li}_3\text{N}_2$                                | 40.22  | -      | - | -          |
| Li-R152 | $\text{Li}_3\text{N} + \text{N}_2 = 3\text{LiN}$                                            | 80.44  | -      | - | -          |
| Li-R153 | $1/4\text{Li}_3\text{N} + \text{N}_2 = 3/4\text{LiN}_3$                                     | 321.75 | -18.43 | - | endergonic |
| Li-R154 | $2\text{Li}_3\text{N}_2 + \text{N}_2 = 6\text{LiN}$                                         | 28.68  | -      | - | -          |
| Li-R155 | $2/7\text{Li}_3\text{N}_2 + \text{N}_2 = 6/7\text{LiN}_3$                                   | 200.78 | -      | - | -          |
| Li-R156 | $2\text{Li}_4\text{HN} + \text{N}_2 = 4\text{Li}_2\text{N} + \text{H}_2$                    | 30.39  | -      | - | -          |
| Li-R157 | $6\text{Li}_4\text{HN} + \text{N}_2 = 8\text{Li}_3\text{N} + 3\text{H}_2$                   | 8.56   | -      | - | -          |
| Li-R158 | $6/5\text{Li}_4\text{HN} + \text{N}_2 = 8/5\text{Li}_3\text{N}_2 + 3/5\text{H}_2$           | 52.22  | -      | - | -          |
| Li-R159 | $2/3\text{Li}_4\text{HN} + \text{N}_2 = 8/3\text{LiN} + 1/3\text{H}_2$                      | 95.88  | -      | - | -          |
| Li-R160 | $2/11\text{Li}_4\text{HN} + \text{N}_2 = 8/11\text{LiN}_3 + 1/11\text{H}_2$                 | 357.85 | -      | - | -          |
| Li-R161 | $3/2\text{Li}_4\text{HN} + \text{N}_2 = 3\text{Li}_2\text{N} + 1/2\text{NH}_3$              | 30.39  | -      | - | -          |
| Li-R162 | $3\text{Li}_4\text{HN} + \text{N}_2 = 4\text{Li}_3\text{N} + \text{NH}_3$                   | 8.56   | -      | - | -          |
| Li-R163 | $\text{Li}_4\text{HN} + \text{N}_2 = 4/3\text{Li}_3\text{N}_2 + 1/3\text{NH}_3$             | 52.22  | -      | - | -          |
| Li-R164 | $3/5\text{Li}_4\text{HN} + \text{N}_2 = 12/5\text{LiN} + 1/5\text{NH}_3$                    | 95.88  | -      | - | -          |
| Li-R165 | $3/17\text{Li}_4\text{HN} + \text{N}_2 = 12/17\text{LiN}_3 + 1/17\text{NH}_3$               | 357.85 | -      | - | -          |
| Li-R166 | $3\text{Li}_7\text{H}_5\text{N}_4 + \text{N}_2 = 7\text{Li}_3(\text{HN})_2 + 1/2\text{H}_2$ | 8.21   | -      | - | -          |
| Li-R167 | $3\text{Li}_7\text{H}_5\text{N}_4 + \text{N}_2 = 7\text{Li}_3\text{N}_2 + 15/2\text{H}_2$   | 3.92   | -      | - | -          |

|         |                                                                                                 |        |        |   |            |
|---------|-------------------------------------------------------------------------------------------------|--------|--------|---|------------|
| Li-R168 | $2/3\text{Li}_7\text{H}_5\text{N}_4 + \text{N}_2 = 14/3\text{LiN} + 5/3\text{H}_2$              | 33.73  | -      | - | -          |
| Li-R169 | $2/17\text{Li}_7\text{H}_5\text{N}_4 + \text{N}_2 = 14/17\text{LiN}_3 + 5/17\text{H}_2$         | 212.57 | -      | - | -          |
| Li-R170 | $18/7\text{Li}_7\text{H}_5\text{N}_4 + \text{N}_2 = 6\text{Li}_3(\text{HN})_2 + 2/7\text{NH}_3$ | 8.21   | -      | - | -          |
| Li-R171 | $12/7\text{Li}_7\text{H}_5\text{N}_4 + \text{N}_2 = 6\text{Li}_2\text{N} + 20/7\text{NH}_3$     | -10.98 | -      | - | -          |
| Li-R172 | $6/7\text{Li}_7\text{H}_5\text{N}_4 + \text{N}_2 = 2\text{Li}_3\text{N}_2 + 10/7\text{NH}_3$    | 3.92   | -      | - | -          |
| Li-R173 | $3/7\text{Li}_7\text{H}_5\text{N}_4 + \text{N}_2 = 3\text{LiN} + 5/7\text{NH}_3$                | 33.73  | -      | - | -          |
| Li-R174 | $3/28\text{Li}_7\text{H}_5\text{N}_4 + \text{N}_2 = 3/4\text{LiN}_3 + 5/28\text{NH}_3$          | 212.57 | -      | - | -          |
| Li-R175 | $15/4\text{LiH} + \text{N}_2 = 1/4\text{Li}_{15}\text{H}_9\text{N}_8 + 3/4\text{H}_2$           | 88.92  | -      | - | -          |
| Li-R176 | $4\text{LiH} + \text{N}_2 = 2\text{Li}_2\text{HN} + \text{H}_2$                                 | 81.78  | -      | - | -          |
| Li-R177 | $3\text{LiH} + \text{N}_2 = \text{Li}_3(\text{HN})_2 + 1/2\text{H}_2$                           | 113.26 | -      | - | -          |
| Li-R178 | $3\text{LiH} + \text{N}_2 = \text{Li}_3\text{H}_3\text{N}_2$                                    | 117.49 | -      | - | -          |
| Li-R179 | $8\text{LiH} + \text{N}_2 = 2\text{Li}_4\text{HN} + 3\text{H}_2$                                | 34.55  | -      | - | -          |
| Li-R180 | $7/2\text{LiH} + \text{N}_2 = 1/2\text{Li}_7\text{H}_5\text{N}_4 + 1/2\text{H}_2$               | 97.08  | -      | - | -          |
| Li-R181 | $4\text{LiH} + \text{N}_2 = 2\text{Li}_2\text{N} + 2\text{H}_2$                                 | 75.43  | -      | - | -          |
| Li-R182 | $6\text{LiH} + \text{N}_2 = 2\text{Li}_3\text{N} + 3\text{H}_2$                                 | 46.06  | 214.13 | - | endergonic |
| Li-R183 | $3\text{LiH} + \text{N}_2 = \text{Li}_3\text{N}_2 + 3/2\text{H}_2$                              | 104.81 | -      | - | -          |
| Li-R184 | $2\text{LiH} + \text{N}_2 = 2\text{LiN} + \text{H}_2$                                           | 163.55 | -      | - | -          |
| Li-R185 | $2/3\text{LiH} + \text{N}_2 = 2/3\text{LiN}_3 + 1/3\text{H}_2$                                  | 516.02 | 7.41   | - | endergonic |
| Li-R186 | $6\text{LiH} + \text{N}_2 = 6\text{Li} + 2\text{NH}_3$                                          | -12.68 | 451.45 | - | endergonic |
| Li-R187 | $3\text{LiH} + \text{N}_2 = 1/5\text{Li}_{15}\text{H}_9\text{N}_8 + 2/5\text{NH}_3$             | 88.92  | -      | - | -          |
| Li-R188 | $3\text{LiH} + \text{N}_2 = 3/2\text{Li}_2\text{HN} + 1/2\text{NH}_3$                           | 81.78  | -      | - | -          |
| Li-R189 | $18/7\text{LiH} + \text{N}_2 = 6/7\text{Li}_3(\text{HN})_2 + 2/7\text{NH}_3$                    | 113.26 | -      | - | -          |
| Li-R190 | $4\text{LiH} + \text{N}_2 = \text{Li}_4\text{HN} + \text{NH}_3$                                 | 34.55  | -      | - | -          |
| Li-R191 | $3\text{LiH} + \text{N}_2 = 3/7\text{Li}_7\text{H}_5\text{N}_4 + 2/7\text{NH}_3$                | 97.08  | -      | - | -          |
| Li-R192 | $12/5\text{LiH} + \text{N}_2 = 6/5\text{Li}_2\text{N} + 4/5\text{NH}_3$                         | 75.43  | -      | - | -          |
| Li-R193 | $3\text{LiH} + \text{N}_2 = \text{Li}_3\text{N} + \text{NH}_3$                                  | 46.06  | 61.17  | - | endergonic |
| Li-R194 | $2\text{LiH} + \text{N}_2 = 2/3\text{Li}_3\text{N}_2 + 2/3\text{NH}_3$                          | 104.81 | -      | - | -          |
| Li-R195 | $3/2\text{LiH} + \text{N}_2 = 3/2\text{LiN} + 1/2\text{NH}_3$                                   | 163.55 | -      | - | -          |
| Li-R196 | $3/5\text{LiH} + \text{N}_2 = 3/5\text{LiN}_3 + 1/5\text{NH}_3$                                 | 516.02 | -2.51  | - | endergonic |
| Li-R197 | $\text{LiH}_2\text{N} + \text{N}_2 = \text{LiN}_3 + \text{H}_2$                                 | 113.22 | 148.48 | - | endergonic |
| Li-R198 | $18\text{LiH}_2\text{N} + \text{N}_2 = 6\text{Li}_3(\text{HN})_2 + 8\text{NH}_3$                | -26.19 | -      | - | -          |
| Li-R199 | $12\text{LiH}_2\text{N} + \text{N}_2 = 6\text{Li}_2\text{N} + 8\text{NH}_3$                     | -39.28 | -      | - | -          |
| Li-R200 | $6\text{LiH}_2\text{N} + \text{N}_2 = 2\text{Li}_3\text{N}_2 + 4\text{NH}_3$                    | -29.11 | -      | - | -          |
| Li-R201 | $3\text{LiH}_2\text{N} + \text{N}_2 = 3\text{LiN} + 2\text{NH}_3$                               | -8.78  | -      | - | -          |
| Li-R202 | $3/4\text{LiH}_2\text{N} + \text{N}_2 = 3/4\text{LiN}_3 + 1/2\text{NH}_3$                       | 113.22 | 88.41  | - | endergonic |
| Li-R203 | $\text{LiN} + \text{N}_2 = \text{LiN}_3$                                                        | 133.74 | -      | - | -          |

Table S21: The Mn-based system

| ID     | Reaction                                                                                          | dm_stoich [%] | h298 [kJ/mol] | T_eq [°C] | Type       |
|--------|---------------------------------------------------------------------------------------------------|---------------|---------------|-----------|------------|
| Mn-R01 | $2\text{Mn} + \text{H}_2 = 2\text{MnH}$                                                           | 1.83          | -             | -         | -          |
| Mn-R02 | $1/9\text{Mn}(\text{H15N8})_2 + \text{H}_2 = 1/9\text{Mn} + 16/9\text{NH}_3$                      | -82.24        | -             | -         | -          |
| Mn-R03 | $2/19\text{Mn}(\text{H15N8})_2 + \text{H}_2 = 2/19\text{MnH} + 32/19\text{NH}_3$                  | -81.91        | -             | -         | -          |
| Mn-R04 | $1/8\text{Mn}(\text{H15N8})_2 + \text{H}_2 = 1/8\text{Mn}(\text{H}_2\text{N})_2 + 7/4\text{NH}_3$ | -71.88        | -             | -         | -          |
| Mn-R05 | $4/33\text{Mn}(\text{H15N8})_2 + \text{H}_2 = 2/33\text{Mn}_2\text{N} + 62/33\text{NH}_3$         | -79.97        | -             | -         | -          |
| Mn-R06 | $1/8\text{Mn}(\text{H15N8})_2 + \text{H}_2 = 1/24\text{Mn}_3\text{N}_2 + 23/12\text{NH}_3$        | -79.22        | -             | -         | -          |
| Mn-R07 | $1/7\text{Mn}(\text{H15N8})_2 + \text{H}_2 = 1/21\text{Mn}_3\text{N}_4 + 44/21\text{NH}_3$        | -76.2         | -             | -         | -          |
| Mn-R08 | $8/69\text{Mn}(\text{H15N8})_2 + \text{H}_2 = 2/69\text{Mn}_4\text{N} + 42/23\text{NH}_3$         | -81.11        | -             | -         | -          |
| Mn-R09 | $2/15\text{Mn}(\text{H15N8})_2 + \text{H}_2 = 2/15\text{MnN} + 2\text{NH}_3$                      | -77.71        | -             | -         | -          |
| Mn-R10 | $5/42\text{Mn}(\text{H15N8})_2 + \text{H}_2 = 1/42\text{Mn}_5\text{N}_2 + 13/7\text{NH}_3$        | -80.43        | -             | -         | -          |
| Mn-R11 | $\text{Mn}(\text{H}_2\text{N})_2 + \text{H}_2 = \text{Mn} + 2\text{NH}_3$                         | -36.84        | -             | -         | -          |
| Mn-R12 | $2/3\text{Mn}(\text{H}_2\text{N})_2 + \text{H}_2 = 2/3\text{MnH} + 4/3\text{NH}_3$                | -35.68        | -             | -         | -          |
| Mn-R13 | $4\text{Mn}(\text{H}_2\text{N})_2 + \text{H}_2 = 2\text{Mn}_2\text{N} + 6\text{NH}_3$             | -28.79        | -             | -         | -          |
| Mn-R14 | $8/5\text{Mn}(\text{H}_2\text{N})_2 + \text{H}_2 = 2/5\text{Mn}_4\text{N} + 14/5\text{NH}_3$      | -32.82        | -             | -         | -          |
| Mn-R15 | $5/2\text{Mn}(\text{H}_2\text{N})_2 + \text{H}_2 = 1/2\text{Mn}_5\text{N}_2 + 4\text{NH}_3$       | -30.4         | -             | -         | -          |
| Mn-R16 | $\text{Mn}_2\text{N} + \text{H}_2 = 2\text{MnH} + 1/2\text{N}_2$                                  | -9.68         | -             | -         | -          |
| Mn-R17 | $2/3\text{Mn}_2\text{N} + \text{H}_2 = 4/3\text{Mn} + 2/3\text{NH}_3$                             | -11.31        | 53.44         | -         | endergonic |
| Mn-R18 | $2/5\text{Mn}_2\text{N} + \text{H}_2 = 4/5\text{MnH} + 2/5\text{NH}_3$                            | -9.68         | -             | -         | -          |
| Mn-R19 | $4/3\text{Mn}_2\text{N} + \text{H}_2 = 2/3\text{Mn}_4\text{N} + 2/3\text{NH}_3$                   | -5.65         | 51.69         | -         | endergonic |
| Mn-R20 | $10/3\text{Mn}_2\text{N} + \text{H}_2 = 4/3\text{Mn}_5\text{N}_2 + 2/3\text{NH}_3$                | -2.26         | 117.28        | -         | endergonic |
| Mn-R21 | $2/3\text{Mn}_3\text{N}_2 + \text{H}_2 = 2\text{MnH} + 2/3\text{N}_2$                             | -12.96        | -             | -         | -          |
| Mn-R22 | $1/3\text{Mn}_3\text{N}_2 + \text{H}_2 = \text{Mn} + 2/3\text{NH}_3$                              | -14.53        | 33.28         | -         | endergonic |
| Mn-R23 | $2/9\text{Mn}_3\text{N}_2 + \text{H}_2 = 2/3\text{MnH} + 4/9\text{NH}_3$                          | -12.96        | -             | -         | -          |
| Mn-R24 | $4/3\text{Mn}_3\text{N}_2 + \text{H}_2 = 2\text{Mn}_2\text{N} + 2/3\text{NH}_3$                   | -3.63         | -27.18        | 96.8      | exergonic  |
| Mn-R25 | $8/15\text{Mn}_3\text{N}_2 + \text{H}_2 = 2/5\text{Mn}_4\text{N} + 2/3\text{NH}_3$                | -9.08         | 20.15         | -         | endergonic |
| Mn-R26 | $5/6\text{Mn}_3\text{N}_2 + \text{H}_2 = 1/2\text{Mn}_5\text{N}_2 + 2/3\text{NH}_3$               | -5.81         | 26.99         | -         | endergonic |
| Mn-R27 | $2/3\text{Mn}_3\text{N}_4 + \text{H}_2 = 2\text{MnH} + 4/3\text{N}_2$                             | -24           | -             | -         | -          |
| Mn-R28 | $1/6\text{Mn}_3\text{N}_4 + \text{H}_2 = 1/2\text{Mn} + 2/3\text{NH}_3$                           | -25.37        | -             | -         | -          |
| Mn-R29 | $2/15\text{Mn}_3\text{N}_4 + \text{H}_2 = 2/5\text{MnH} + 8/15\text{NH}_3$                        | -24           | -             | -         | -          |
| Mn-R30 | $4/15\text{Mn}_3\text{N}_4 + \text{H}_2 = 2/5\text{Mn}_2\text{N} + 2/3\text{NH}_3$                | -15.86        | -             | -         | -          |
| Mn-R31 | $1/3\text{Mn}_3\text{N}_4 + \text{H}_2 = 1/3\text{Mn}_3\text{N}_2 + 2/3\text{NH}_3$               | -12.69        | -             | -         | -          |
| Mn-R32 | $8/39\text{Mn}_3\text{N}_4 + \text{H}_2 = 2/13\text{Mn}_4\text{N} + 2/3\text{NH}_3$               | -20.61        | -             | -         | -          |
| Mn-R33 | $2/3\text{Mn}_3\text{N}_4 + \text{H}_2 = 2\text{MnN} + 2/3\text{NH}_3$                            | -6.34         | -             | -         | -          |

|        |                                                                                        |        |         |       |            |
|--------|----------------------------------------------------------------------------------------|--------|---------|-------|------------|
| Mn-R34 | $5/21\text{Mn}_3\text{N}_4 + \text{H}_2 = 1/7\text{Mn}_5\text{N}_2 + 2/3\text{NH}_3$   | -17.76 | -       | -     | -          |
| Mn-R35 | $1/2\text{Mn}_4\text{N} + \text{H}_2 = 2\text{MnH} + 1/4\text{N}_2$                    | -4.27  | -       | -     | -          |
| Mn-R36 | $2/3\text{Mn}_4\text{N} + \text{H}_2 = 8/3\text{Mn} + 2/3\text{NH}_3$                  | -5.99  | 55.18   | -     | endergonic |
| Mn-R37 | $2/7\text{Mn}_4\text{N} + \text{H}_2 = 8/7\text{MnH} + 2/7\text{NH}_3$                 | -4.27  | -       | -     | -          |
| Mn-R38 | $2/5\text{Mn}_5\text{N}_2 + \text{H}_2 = 2\text{MnH} + 2/5\text{N}_2$                  | -7.59  | -       | -     | -          |
| Mn-R39 | $1/3\text{Mn}_5\text{N}_2 + \text{H}_2 = 5/3\text{Mn} + 2/3\text{NH}_3$                | -9.25  | 37.48   | -     | endergonic |
| Mn-R40 | $2/11\text{Mn}_5\text{N}_2 + \text{H}_2 = 10/11\text{MnH} + 4/11\text{NH}_3$           | -7.59  | -       | -     | -          |
| Mn-R41 | $8/9\text{Mn}_5\text{N}_2 + \text{H}_2 = 10/9\text{Mn}_4\text{N} + 2/3\text{NH}_3$     | -3.47  | 7.97    | -     | endergonic |
| Mn-R42 | $2\text{MnN} + \text{H}_2 = 2\text{MnH} + \text{N}_2$                                  | -18.85 | -       | -     | -          |
| Mn-R43 | $2/3\text{MnN} + \text{H}_2 = 2/3\text{Mn} + 2/3\text{NH}_3$                           | -20.32 | 9.48    | -     | endergonic |
| Mn-R44 | $1/2\text{MnN} + \text{H}_2 = 1/2\text{MnH} + 1/2\text{NH}_3$                          | -18.85 | -       | -     | -          |
| Mn-R45 | $4/3\text{MnN} + \text{H}_2 = 2/3\text{Mn}_2\text{N} + 2/3\text{NH}_3$                 | -10.16 | -34.48  | 624   | exergonic  |
| Mn-R46 | $2\text{MnN} + \text{H}_2 = 2/3\text{Mn}_3\text{N}_2 + 2/3\text{NH}_3$                 | -6.77  | -38.13  | -     | exergonic  |
| Mn-R47 | $8/9\text{MnN} + \text{H}_2 = 2/9\text{Mn}_4\text{N} + 2/3\text{NH}_3$                 | -15.24 | -5.76   | 125.4 | exergonic  |
| Mn-R48 | $10/9\text{MnN} + \text{H}_2 = 2/9\text{Mn}_5\text{N}_2 + 2/3\text{NH}_3$              | -12.19 | -9.19   | 272.6 | exergonic  |
| Mn-R49 | $4\text{Mn} + \text{N}_2 = 2\text{Mn}_2\text{N}$                                       | 12.75  | -252.1  | -     | exergonic  |
| Mn-R50 | $3\text{Mn} + \text{N}_2 = \text{Mn}_3\text{N}_2$                                      | 17     | -191.64 | -     | exergonic  |
| Mn-R51 | $3/2\text{Mn} + \text{N}_2 = 1/2\text{Mn}_3\text{N}_4$                                 | 33.99  | -       | -     | -          |
| Mn-R52 | $8\text{Mn} + \text{N}_2 = 2\text{Mn}_4\text{N}$                                       | 6.37   | -257.33 | -     | exergonic  |
| Mn-R53 | $2\text{Mn} + \text{N}_2 = 2\text{MnN}$                                                | 25.5   | -120.23 | 496.6 | exergonic  |
| Mn-R54 | $5\text{Mn} + \text{N}_2 = \text{Mn}_5\text{N}_2$                                      | 10.2   | -204.22 | -     | exergonic  |
| Mn-R55 | $3\text{Mn}(\text{H}_2\text{N})_2 + \text{N}_2 = \text{Mn}_3\text{N}_4 + 4\text{NH}_3$ | -15.37 | -       | -     | -          |
| Mn-R56 | $6\text{Mn}(\text{H}_2\text{N})_2 + \text{N}_2 = 6\text{MnN} + 8\text{NH}_3$           | -20.74 | -       | -     | -          |
| Mn-R57 | $6\text{Mn}_2\text{N} + \text{N}_2 = 4\text{Mn}_3\text{N}_2$                           | 3.77   | -10.26  | -     | exergonic  |
| Mn-R58 | $6/5\text{Mn}_2\text{N} + \text{N}_2 = 4/5\text{Mn}_3\text{N}_4$                       | 18.84  | -       | -     | -          |
| Mn-R59 | $2\text{Mn}_2\text{N} + \text{N}_2 = 4\text{MnN}$                                      | 11.31  | 11.65   | -     | endergonic |
| Mn-R60 | $\text{Mn}_3\text{N}_2 + \text{N}_2 = \text{Mn}_3\text{N}_4$                           | 14.53  | -       | -     | -          |
| Mn-R61 | $2\text{Mn}_3\text{N}_2 + \text{N}_2 = 6\text{MnN}$                                    | 7.26   | 22.6    | -     | endergonic |
| Mn-R62 | $2\text{Mn}_4\text{N} + \text{N}_2 = 4\text{Mn}_2\text{N}$                             | 5.99   | -246.87 | 639.4 | exergonic  |
| Mn-R63 | $6/5\text{Mn}_4\text{N} + \text{N}_2 = 8/5\text{Mn}_3\text{N}_2$                       | 9.99   | -152.23 | -     | exergonic  |
| Mn-R64 | $6/13\text{Mn}_4\text{N} + \text{N}_2 = 8/13\text{Mn}_3\text{N}_4$                     | 25.97  | -       | -     | -          |
| Mn-R65 | $2/3\text{Mn}_4\text{N} + \text{N}_2 = 8/3\text{MnN}$                                  | 17.98  | -74.52  | 204   | exergonic  |
| Mn-R66 | $10/3\text{Mn}_4\text{N} + \text{N}_2 = 8/3\text{Mn}_5\text{N}_2$                      | 3.6    | -115.7  | 450.4 | exergonic  |
| Mn-R67 | $4\text{Mn}_5\text{N}_2 + \text{N}_2 = 10\text{Mn}_2\text{N}$                          | 2.31   | -443.62 | 690.4 | exergonic  |
| Mn-R68 | $3/2\text{Mn}_5\text{N}_2 + \text{N}_2 = 5/2\text{Mn}_3\text{N}_2$                     | 6.17   | -172.77 | -     | exergonic  |
| Mn-R69 | $3/7\text{Mn}_5\text{N}_2 + \text{N}_2 = 5/7\text{Mn}_3\text{N}_4$                     | 21.59  | -       | -     | -          |

|        |                                                                               |       |        |       |           |
|--------|-------------------------------------------------------------------------------|-------|--------|-------|-----------|
| Mn-R70 | $2/3\text{Mn}_5\text{N}_2 + \text{N}_2 = 10/3\text{MnN}$                      | 13.88 | -64.23 | 144.9 | exergonic |
| Mn-R71 | $4\text{MnH} + \text{N}_2 = 2\text{Mn}_2\text{N} + 2\text{H}_2$               | 10.72 | -      | -     | -         |
| Mn-R72 | $3\text{MnH} + \text{N}_2 = \text{Mn}_3\text{N}_2 + 3/2\text{H}_2$            | 14.89 | -      | -     | -         |
| Mn-R73 | $3/2\text{MnH} + \text{N}_2 = 1/2\text{Mn}_3\text{N}_4 + 3/4\text{H}_2$       | 31.58 | -      | -     | -         |
| Mn-R74 | $8\text{MnH} + \text{N}_2 = 2\text{Mn}_4\text{N} + 4\text{H}_2$               | 4.46  | -      | -     | -         |
| Mn-R75 | $2\text{MnH} + \text{N}_2 = 2\text{MnN} + \text{H}_2$                         | 23.23 | -      | -     | -         |
| Mn-R76 | $5\text{MnH} + \text{N}_2 = \text{Mn}_5\text{N}_2 + 5/2\text{H}_2$            | 8.21  | -      | -     | -         |
| Mn-R77 | $6\text{MnH} + \text{N}_2 = 6\text{Mn} + 2\text{NH}_3$                        | -1.8  | -      | -     | -         |
| Mn-R78 | $12/5\text{MnH} + \text{N}_2 = 6/5\text{Mn}_2\text{N} + 4/5\text{NH}_3$       | 10.72 | -      | -     | -         |
| Mn-R79 | $2\text{MnH} + \text{N}_2 = 2/3\text{Mn}_3\text{N}_2 + 2/3\text{NH}_3$        | 14.89 | -      | -     | -         |
| Mn-R80 | $6/5\text{MnH} + \text{N}_2 = 2/5\text{Mn}_3\text{N}_4 + 2/5\text{NH}_3$      | 31.58 | -      | -     | -         |
| Mn-R81 | $24/7\text{MnH} + \text{N}_2 = 6/7\text{Mn}_4\text{N} + 8/7\text{NH}_3$       | 4.46  | -      | -     | -         |
| Mn-R82 | $3/2\text{MnH} + \text{N}_2 = 3/2\text{MnN} + 1/2\text{NH}_3$                 | 23.23 | -      | -     | -         |
| Mn-R83 | $30/11\text{MnH} + \text{N}_2 = 6/11\text{Mn}_5\text{N}_2 + 10/11\text{NH}_3$ | 8.21  | -      | -     | -         |
| Mn-R84 | $6\text{MnN} + \text{N}_2 = 2\text{Mn}_3\text{N}_4$                           | 6.77  | -      | -     | -         |

Table S22: The Mo-based system

| ID      | Reaction                                                                                     | dm_stoich [%] | h298 [kJ/mol] | T_eq [°C] | Type       |
|---------|----------------------------------------------------------------------------------------------|---------------|---------------|-----------|------------|
| Mo-R001 | $6\text{Mo} + \text{H}_2 = 2\text{Mo}_3\text{H}$                                             | 0.35          | 656.27        | -         | endergonic |
| Mo-R002 | $2\text{Mo} + \text{H}_2 = 2\text{MoH}$                                                      | 1.05          | 152.06        | -         | endergonic |
| Mo-R003 | $2/5\text{Mo}_{15}\text{N}_{16} + \text{H}_2 = 2\text{Mo}_3\text{H} + 16/5\text{N}_2$        | -13.17        | -             | -         | -          |
| Mo-R004 | $2/15\text{Mo}_{15}\text{N}_{16} + \text{H}_2 = 2\text{MoH} + 16/15\text{N}_2$               | -12.56        | -             | -         | -          |
| Mo-R005 | $1/24\text{Mo}_{15}\text{N}_{16} + \text{H}_2 = 5/8\text{Mo} + 2/3\text{NH}_3$               | -13.47        | -             | -         | -          |
| Mo-R006 | $2/53\text{Mo}_{15}\text{N}_{16} + \text{H}_2 = 10/53\text{Mo}_3\text{H} + 32/53\text{NH}_3$ | -13.17        | -             | -         | -          |
| Mo-R007 | $2/63\text{Mo}_{15}\text{N}_{16} + \text{H}_2 = 10/21\text{MoH} + 32/63\text{NH}_3$          | -12.56        | -             | -         | -          |
| Mo-R008 | $4/51\text{Mo}_{15}\text{N}_{16} + \text{H}_2 = 10/17\text{Mo}_2\text{N} + 2/3\text{NH}_3$   | -7.16         | -             | -         | -          |
| Mo-R009 | $1/9\text{Mo}_{15}\text{N}_{16} + \text{H}_2 = 5/9\text{Mo}_3\text{N}_2 + 2/3\text{NH}_3$    | -5.05         | -             | -         | -          |
| Mo-R010 | $2/3\text{Mo}_{15}\text{N}_{16} + \text{H}_2 = 10\text{MoN} + 2/3\text{NH}_3$                | -0.84         | -             | -         | -          |
| Mo-R011 | $1/24\text{Mo}_{15}\text{N}_{16} + \text{H}_2 = 5/16\text{Mo}_2 + 2/3\text{NH}_3$            | -13.47        | -             | -         | -          |
| Mo-R012 | $3\text{Mo}_2 + \text{H}_2 = 2\text{Mo}_3\text{H}$                                           | 0.35          | -446.23       | 389.5     | exergonic  |
| Mo-R013 | $\text{Mo}_2 + \text{H}_2 = 2\text{MoH}$                                                     | 1.05          | -215.44       | 416.4     | exergonic  |
| Mo-R014 | $3\text{Mo}_2\text{N} + \text{H}_2 = 2\text{Mo}_3\text{H} + 3/2\text{N}_2$                   | -6.48         | 901.03        | -         | endergonic |
| Mo-R015 | $\text{Mo}_2\text{N} + \text{H}_2 = 2\text{MoH} + 1/2\text{N}_2$                             | -5.82         | 233.64        | -         | endergonic |
| Mo-R016 | $2/3\text{Mo}_2\text{N} + \text{H}_2 = 4/3\text{Mo} + 2/3\text{NH}_3$                        | -6.8          | 23.79         | -         | endergonic |
| Mo-R017 | $6/11\text{Mo}_2\text{N} + \text{H}_2 = 4/11\text{Mo}_3\text{H} + 6/11\text{NH}_3$           | -6.48         | 138.79        | -         | endergonic |
| Mo-R018 | $2/5\text{Mo}_2\text{N} + \text{H}_2 = 4/5\text{MoH} + 2/5\text{NH}_3$                       | -5.82         | 75.1          | -         | endergonic |
| Mo-R019 | $2/3\text{Mo}_2\text{N} + \text{H}_2 = 2/3\text{Mo}_2 + 2/3\text{NH}_3$                      | -6.8          | 268.79        | -         | endergonic |
| Mo-R020 | $3\text{Mo}_2\text{N}_3 + \text{H}_2 = 2\text{Mo}_3\text{H} + 9/2\text{N}_2$                 | -17.68        | -             | -         | -          |
| Mo-R021 | $\text{Mo}_2\text{N}_3 + \text{H}_2 = 2\text{MoH} + 3/2\text{N}_2$                           | -17.1         | -             | -         | -          |
| Mo-R022 | $2/9\text{Mo}_2\text{N}_3 + \text{H}_2 = 4/9\text{Mo} + 2/3\text{NH}_3$                      | -17.96        | -             | -         | -          |
| Mo-R023 | $6/29\text{Mo}_2\text{N}_3 + \text{H}_2 = 4/29\text{Mo}_3\text{H} + 18/29\text{NH}_3$        | -17.68        | -             | -         | -          |
| Mo-R024 | $2/11\text{Mo}_2\text{N}_3 + \text{H}_2 = 4/11\text{MoH} + 6/11\text{NH}_3$                  | -17.1         | -             | -         | -          |
| Mo-R025 | $10/13\text{Mo}_2\text{N}_3 + \text{H}_2 = 4/39\text{Mo}_{15}\text{N}_{16} + 2/3\text{NH}_3$ | -5.19         | -             | -         | -          |

|         |                                                                                      |        |         |       |            |
|---------|--------------------------------------------------------------------------------------|--------|---------|-------|------------|
| Mo-R026 | $1/3\text{Mo}_2\text{N}_3 + \text{H}_2 = 1/3\text{Mo}_2\text{N} + 2/3\text{NH}_3$    | -11.98 | -       | -     | -          |
| Mo-R027 | $2/5\text{Mo}_2\text{N}_3 + \text{H}_2 = 4/15\text{Mo}_3\text{N}_2 + 2/3\text{NH}_3$ | -9.98  | -       | -     | -          |
| Mo-R028 | $2/3\text{Mo}_2\text{N}_3 + \text{H}_2 = 4/3\text{MoN} + 2/3\text{NH}_3$             | -5.99  | -       | -     | -          |
| Mo-R029 | $2/9\text{Mo}_2\text{N}_3 + \text{H}_2 = 2/9\text{Mo}_2 + 2/3\text{NH}_3$            | -17.96 | -       | -     | -          |
| Mo-R030 | $\text{Mo}_3\text{H} + \text{H}_2 = 3\text{MoH}$                                     | 0.7    | -100.05 | 485.6 | exergonic  |
| Mo-R031 | $2\text{Mo}_3\text{N}_2 + \text{H}_2 = 2\text{Mo}_3\text{H} + 2\text{N}_2$           | -8.55  | -       | -     | -          |
| Mo-R032 | $2/3\text{Mo}_3\text{N}_2 + \text{H}_2 = 2\text{MoH} + 2/3\text{N}_2$                | -7.91  | -       | -     | -          |
| Mo-R033 | $1/3\text{Mo}_3\text{N}_2 + \text{H}_2 = \text{Mo} + 2/3\text{NH}_3$                 | -8.87  | -       | -     | -          |
| Mo-R034 | $2/7\text{Mo}_3\text{N}_2 + \text{H}_2 = 2/7\text{Mo}_3\text{H} + 4/7\text{NH}_3$    | -8.55  | -       | -     | -          |
| Mo-R035 | $2/9\text{Mo}_3\text{N}_2 + \text{H}_2 = 2/3\text{MoH} + 4/9\text{NH}_3$             | -7.91  | -       | -     | -          |
| Mo-R036 | $4/3\text{Mo}_3\text{N}_2 + \text{H}_2 = 2\text{Mo}_2\text{N} + 2/3\text{NH}_3$      | -2.22  | -       | -     | -          |
| Mo-R037 | $1/3\text{Mo}_3\text{N}_2 + \text{H}_2 = 1/2\text{Mo}_2 + 2/3\text{NH}_3$            | -8.87  | -       | -     | -          |
| Mo-R038 | $6\text{MoN} + \text{H}_2 = 2\text{Mo}_3\text{H} + 3\text{N}_2$                      | -12.43 | 901.02  | -     | endergonic |
| Mo-R039 | $2\text{MoN} + \text{H}_2 = 2\text{MoH} + \text{N}_2$                                | -11.82 | 233.64  | -     | endergonic |
| Mo-R040 | $2/3\text{MoN} + \text{H}_2 = 2/3\text{Mo} + 2/3\text{NH}_3$                         | -12.74 | -3.4    | 293   | exergonic  |
| Mo-R041 | $3/5\text{MoN} + \text{H}_2 = 1/5\text{Mo}_3\text{H} + 3/5\text{NH}_3$               | -12.43 | 62.56   | -     | endergonic |
| Mo-R042 | $1/2\text{MoN} + \text{H}_2 = 1/2\text{MoH} + 1/2\text{NH}_3$                        | -11.82 | 35.46   | -     | endergonic |
| Mo-R043 | $4/3\text{MoN} + \text{H}_2 = 2/3\text{Mo}_2\text{N} + 2/3\text{NH}_3$               | -6.37  | -30.6   | -     | exergonic  |
| Mo-R044 | $2\text{MoN} + \text{H}_2 = 2/3\text{Mo}_3\text{N}_2 + 2/3\text{NH}_3$               | -4.25  | -       | -     | -          |
| Mo-R045 | $2/3\text{MoN} + \text{H}_2 = 1/3\text{Mo}_2 + 2/3\text{NH}_3$                       | -12.74 | 119.1   | -     | endergonic |
| Mo-R046 | $6\text{MoN}_2 + \text{H}_2 = 2\text{Mo}_3\text{H} + 6\text{N}_2$                    | -22.33 | 822.74  | -     | endergonic |
| Mo-R047 | $2\text{MoN}_2 + \text{H}_2 = 2\text{MoH} + 2\text{N}_2$                             | -21.79 | 207.55  | -     | endergonic |
| Mo-R048 | $1/3\text{MoN}_2 + \text{H}_2 = 1/3\text{Mo} + 2/3\text{NH}_3$                       | -22.6  | -21.35  | 520.4 | exergonic  |
| Mo-R049 | $6/19\text{MoN}_2 + \text{H}_2 = 2/19\text{Mo}_3\text{H} + 12/19\text{NH}_3$         | -22.33 | 14.31   | -     | endergonic |
| Mo-R050 | $2/7\text{MoN}_2 + \text{H}_2 = 2/7\text{MoH} + 4/7\text{NH}_3$                      | -21.79 | 3.42    | -     | endergonic |
| Mo-R051 | $5/7\text{MoN}_2 + \text{H}_2 = 1/21\text{Mo}_{15}\text{N}_{16} + 2/3\text{NH}_3$    | -10.55 | -       | -     | -          |
| Mo-R052 | $4/9\text{MoN}_2 + \text{H}_2 = 2/9\text{Mo}_2\text{N} + 2/3\text{NH}_3$             | -16.95 | -36.4   | 788.7 | exergonic  |
| Mo-R053 | $4/3\text{MoN}_2 + \text{H}_2 = 2/3\text{Mo}_2\text{N}_3 + 2/3\text{NH}_3$           | -5.65  | -       | -     | -          |
| Mo-R054 | $1/2\text{MoN}_2 + \text{H}_2 = 1/6\text{Mo}_3\text{N}_2 + 2/3\text{NH}_3$           | -15.07 | -       | -     | -          |
| Mo-R055 | $2/3\text{MoN}_2 + \text{H}_2 = 2/3\text{MoN} + 2/3\text{NH}_3$                      | -11.3  | -39.3   | 568   | exergonic  |
| Mo-R056 | $1/3\text{MoN}_2 + \text{H}_2 = 1/6\text{Mo}_2 + 2/3\text{NH}_3$                     | -22.6  | 39.9    | -     | endergonic |
| Mo-R057 | $15/8\text{Mo} + \text{N}_2 = 1/8\text{Mo}_{15}\text{N}_{16}$                        | 15.57  | -       | -     | -          |
| Mo-R058 | $4\text{Mo} + \text{N}_2 = 2\text{Mo}_2\text{N}$                                     | 7.3    | -163.18 | 686.8 | exergonic  |
| Mo-R059 | $4/3\text{Mo} + \text{N}_2 = 2/3\text{Mo}_2\text{N}_3$                               | 21.9   | -       | -     | -          |
| Mo-R060 | $3\text{Mo} + \text{N}_2 = \text{Mo}_3\text{N}_2$                                    | 9.73   | -       | -     | -          |
| Mo-R061 | $2\text{Mo} + \text{N}_2 = 2\text{MoN}$                                              | 14.6   | -81.59  | 165.1 | exergonic  |
| Mo-R062 | $\text{Mo} + \text{N}_2 = \text{MoN}_2$                                              | 29.2   | -27.75  | -     | endergonic |
| Mo-R063 | $4/13\text{Mo}_{15}\text{N}_{16} + \text{N}_2 = 30/13\text{Mo}_2\text{N}_3$          | 5.47   | -       | -     | -          |
| Mo-R064 | $1/7\text{Mo}_{15}\text{N}_{16} + \text{N}_2 = 15/7\text{MoN}_2$                     | 11.79  | -       | -     | -          |
| Mo-R065 | $15/16\text{Mo}_2 + \text{N}_2 = 1/8\text{Mo}_{15}\text{N}_{16}$                     | 15.57  | -       | -     | -          |
| Mo-R066 | $2\text{Mo}_2 + \text{N}_2 = 2\text{Mo}_2\text{N}$                                   | 7.3    | -898.18 | -     | exergonic  |
| Mo-R067 | $2/3\text{Mo}_2 + \text{N}_2 = 2/3\text{Mo}_2\text{N}_3$                             | 21.9   | -       | -     | -          |
| Mo-R068 | $3/2\text{Mo}_2 + \text{N}_2 = \text{Mo}_3\text{N}_2$                                | 9.73   | -       | -     | -          |
| Mo-R069 | $\text{Mo}_2 + \text{N}_2 = 2\text{MoN}$                                             | 14.6   | -449.09 | -     | exergonic  |
| Mo-R070 | $1/2\text{Mo}_2 + \text{N}_2 = \text{MoN}_2$                                         | 29.2   | -211.5  | 656.9 | exergonic  |
| Mo-R071 | $30/17\text{Mo}_2\text{N} + \text{N}_2 = 4/17\text{Mo}_{15}\text{N}_{16}$            | 7.71   | -       | -     | -          |
| Mo-R072 | $\text{Mo}_2\text{N} + \text{N}_2 = \text{Mo}_2\text{N}_3$                           | 13.61  | -       | -     | -          |
| Mo-R073 | $6\text{Mo}_2\text{N} + \text{N}_2 = 4\text{Mo}_3\text{N}_2$                         | 2.27   | -       | -     | -          |
| Mo-R074 | $2\text{Mo}_2\text{N} + \text{N}_2 = 4\text{MoN}$                                    | 6.8    | 0       | -     | endergonic |

|         |                                                                                              |       |          |       |            |
|---------|----------------------------------------------------------------------------------------------|-------|----------|-------|------------|
| Mo-R075 | $2/3\text{Mo}_2\text{N} + \text{N}_2 = 4/3\text{MoN}_2$                                      | 20.41 | 17.4     | -     | endergonic |
| Mo-R076 | $2\text{Mo}_2\text{N}_3 + \text{N}_2 = 4\text{MoN}_2$                                        | 5.99  | -        | -     | -          |
| Mo-R077 | $5/8\text{Mo}_3\text{H} + \text{N}_2 = 1/8\text{Mo}_{15}\text{N}_{16} + 5/16\text{H}_2$      | 15.17 | -        | -     | -          |
| Mo-R078 | $4/3\text{Mo}_3\text{H} + \text{N}_2 = 2\text{Mo}_2\text{N} + 2/3\text{H}_2$                 | 6.92  | -600.69  | -     | exergonic  |
| Mo-R079 | $4/9\text{Mo}_3\text{H} + \text{N}_2 = 2/3\text{Mo}_2\text{N}_3 + 2/9\text{H}_2$             | 21.47 | -        | -     | -          |
| Mo-R080 | $\text{Mo}_3\text{H} + \text{N}_2 = \text{Mo}_3\text{N}_2 + 1/2\text{H}_2$                   | 9.35  | -        | -     | -          |
| Mo-R081 | $2/3\text{Mo}_3\text{H} + \text{N}_2 = 2\text{MoN} + 1/3\text{H}_2$                          | 14.2  | -300.34  | -     | exergonic  |
| Mo-R082 | $1/3\text{Mo}_3\text{H} + \text{N}_2 = \text{MoN}_2 + 1/6\text{H}_2$                         | 28.75 | -137.12  | -     | exergonic  |
| Mo-R083 | $6\text{Mo}_3\text{H} + \text{N}_2 = 18\text{Mo} + 2\text{NH}_3$                             | -0.35 | -2060.59 | -     | exergonic  |
| Mo-R084 | $30/53\text{Mo}_3\text{H} + \text{N}_2 = 6/53\text{Mo}_{15}\text{N}_{16} + 10/53\text{NH}_3$ | 15.17 | -        | -     | -          |
| Mo-R085 | $12/11\text{Mo}_3\text{H} + \text{N}_2 = 18/11\text{Mo}_2\text{N} + 4/11\text{NH}_3$         | 6.92  | -508.16  | -     | exergonic  |
| Mo-R086 | $12/29\text{Mo}_3\text{H} + \text{N}_2 = 18/29\text{Mo}_2\text{N}_3 + 4/29\text{NH}_3$       | 21.47 | -        | -     | -          |
| Mo-R087 | $6/7\text{Mo}_3\text{H} + \text{N}_2 = 6/7\text{Mo}_3\text{N}_2 + 2/7\text{NH}_3$            | 9.35  | -        | -     | -          |
| Mo-R088 | $3/5\text{Mo}_3\text{H} + \text{N}_2 = 9/5\text{MoN} + 1/5\text{NH}_3$                       | 14.2  | -279.49  | -     | exergonic  |
| Mo-R089 | $6/19\text{Mo}_3\text{H} + \text{N}_2 = 18/19\text{MoN}_2 + 2/19\text{NH}_3$                 | 28.75 | -134.74  | -     | exergonic  |
| Mo-R090 | $6\text{Mo}_3\text{H} + \text{N}_2 = 9\text{Mo}_2 + 2\text{NH}_3$                            | -0.35 | 1246.91  | 416.5 | exergonic  |
| Mo-R091 | $5/3\text{Mo}_3\text{N}_2 + \text{N}_2 = 1/3\text{Mo}_{15}\text{N}_{16}$                     | 5.32  | -        | -     | -          |
| Mo-R092 | $4/5\text{Mo}_3\text{N}_2 + \text{N}_2 = 6/5\text{Mo}_2\text{N}_3$                           | 11.09 | -        | -     | -          |
| Mo-R093 | $2\text{Mo}_3\text{N}_2 + \text{N}_2 = 6\text{MoN}$                                          | 4.43  | -        | -     | -          |
| Mo-R094 | $1/2\text{Mo}_3\text{N}_2 + \text{N}_2 = 3/2\text{MoN}_2$                                    | 17.74 | -        | -     | -          |
| Mo-R095 | $15/8\text{MoH} + \text{N}_2 = 1/8\text{Mo}_{15}\text{N}_{16} + 15/16\text{H}_2$             | 14.37 | -        | -     | -          |
| Mo-R096 | $4\text{MoH} + \text{N}_2 = 2\text{Mo}_2\text{N} + 2\text{H}_2$                              | 6.18  | -467.29  | -     | exergonic  |
| Mo-R097 | $4/3\text{MoH} + \text{N}_2 = 2/3\text{Mo}_2\text{N}_3 + 2/3\text{H}_2$                      | 20.63 | -        | -     | -          |
| Mo-R098 | $3\text{MoH} + \text{N}_2 = \text{Mo}_3\text{N}_2 + 3/2\text{H}_2$                           | 8.59  | -        | -     | -          |
| Mo-R099 | $2\text{MoH} + \text{N}_2 = 2\text{MoN} + \text{H}_2$                                        | 13.41 | -233.64  | -     | exergonic  |
| Mo-R100 | $\text{MoH} + \text{N}_2 = \text{MoN}_2 + 1/2\text{H}_2$                                     | 27.85 | -103.77  | -     | exergonic  |
| Mo-R101 | $6\text{MoH} + \text{N}_2 = 6\text{Mo} + 2\text{NH}_3$                                       | -1.04 | -547.96  | -     | exergonic  |
| Mo-R102 | $9\text{MoH} + \text{N}_2 = 3\text{Mo}_3\text{H} + 2\text{NH}_3$                             | -0.69 | 208.35   | -     | endergonic |
| Mo-R103 | $10/7\text{MoH} + \text{N}_2 = 2/21\text{Mo}_{15}\text{N}_{16} + 10/21\text{NH}_3$           | 14.37 | -        | -     | -          |
| Mo-R104 | $12/5\text{MoH} + \text{N}_2 = 6/5\text{Mo}_2\text{N} + 4/5\text{NH}_3$                      | 6.18  | -317.09  | -     | exergonic  |
| Mo-R105 | $12/11\text{MoH} + \text{N}_2 = 6/11\text{Mo}_2\text{N}_3 + 4/11\text{NH}_3$                 | 20.63 | -        | -     | -          |
| Mo-R106 | $2\text{MoH} + \text{N}_2 = 2/3\text{Mo}_3\text{N}_2 + 2/3\text{NH}_3$                       | 8.59  | -        | -     | -          |
| Mo-R107 | $3/2\text{MoH} + \text{N}_2 = 3/2\text{MoN} + 1/2\text{NH}_3$                                | 13.41 | -198.18  | -     | exergonic  |
| Mo-R108 | $6/7\text{MoH} + \text{N}_2 = 6/7\text{MoN}_2 + 2/7\text{NH}_3$                              | 27.85 | -102.06  | -     | exergonic  |
| Mo-R109 | $6\text{MoH} + \text{N}_2 = 3\text{Mo}_2 + 2\text{NH}_3$                                     | -1.04 | 554.54   | 495.3 | exergonic  |
| Mo-R110 | $30\text{MoN} + \text{N}_2 = 2\text{Mo}_{15}\text{N}_{16}$                                   | 0.85  | -        | -     | -          |
| Mo-R111 | $4\text{MoN} + \text{N}_2 = 2\text{Mo}_2\text{N}_3$                                          | 6.37  | -        | -     | -          |
| Mo-R112 | $2\text{MoN} + \text{N}_2 = 2\text{MoN}_2$                                                   | 12.74 | 26.09    | -     | endergonic |

Table S23: The Ni-based system

| ID      | Reaction                                         | dm_stoich [%] | h298 [kJ/mol] | T_eq [°C] | Type       |
|---------|--------------------------------------------------|---------------|---------------|-----------|------------|
| Ni-R001 | $4\text{Ni} + \text{H}_2 = 2\text{Ni}_2\text{H}$ | 0.86          | 22.53         | -         | endergonic |
| Ni-R002 | $6\text{Ni} + \text{H}_2 = 2\text{Ni}_3\text{H}$ | 0.57          | -             | -         | -          |
| Ni-R003 | $2\text{Ni} + \text{H}_2 = 2\text{NiH}$          | 1.72          | -4.28         | -         | endergonic |
| Ni-R004 | $2/3\text{Ni} + \text{H}_2 = 2/3\text{NiH}_3$    | 5.15          | -             | -         | -          |
| Ni-R005 | $4\text{Ni} + \text{H}_2 = 4\text{NiH}_{0.5}$    | 0.86          | -7.58         | -         | endergonic |



|         |                                                                                                       |        |         |       |            |
|---------|-------------------------------------------------------------------------------------------------------|--------|---------|-------|------------|
| Ni-R006 | $200/59\text{Ni} + \text{H}_2 = 200/59\text{NiH}_{0.59}$                                              | 1.01   | -7.84   | -     | endergonic |
| Ni-R007 | $50/17\text{Ni} + \text{H}_2 = 50/17\text{NiH}_{0.68}$                                                | 1.17   | -8.43   | -     | endergonic |
| Ni-R008 | $\text{Ni}(\text{H}_2\text{N})_2 + \text{H}_2 = \text{Ni} + 2\text{NH}_3$                             | -35.32 | -       | -     | -          |
| Ni-R009 | $4/5\text{Ni}(\text{H}_2\text{N})_2 + \text{H}_2 = 2/5\text{Ni}_2\text{H} + 8/5\text{NH}_3$           | -34.76 | -       | -     | -          |
| Ni-R010 | $6/7\text{Ni}(\text{H}_2\text{N})_2 + \text{H}_2 = 2/7\text{Ni}_3\text{H} + 12/7\text{NH}_3$          | -34.95 | -       | -     | -          |
| Ni-R011 | $2/3\text{Ni}(\text{H}_2\text{N})_2 + \text{H}_2 = 2/3\text{NiH} + 4/3\text{NH}_3$                    | -34.21 | -       | -     | -          |
| Ni-R012 | $2/5\text{Ni}(\text{H}_2\text{N})_2 + \text{H}_2 = 2/5\text{NiH}_3 + 4/5\text{NH}_3$                  | -31.98 | -       | -     | -          |
| Ni-R013 | $2\text{Ni}(\text{H}_2\text{N})_2 + \text{H}_2 = 2/3\text{Ni}_3\text{N} + 10/3\text{NH}_3$            | -30.17 | -       | -     | -          |
| Ni-R014 | $8/5\text{Ni}(\text{H}_2\text{N})_2 + \text{H}_2 = 2/5\text{Ni}_4\text{N} + 14/5\text{NH}_3$          | -31.46 | -       | -     | -          |
| Ni-R015 | $4/5\text{Ni}(\text{H}_2\text{N})_2 + \text{H}_2 = 4/5\text{NiH}_{0.5} + 8/5\text{NH}_3$              | -34.76 | -       | -     | -          |
| Ni-R016 | $200/259\text{Ni}(\text{H}_2\text{N})_2 + \text{H}_2 = 200/259\text{NiH}_{0.59} + 400/259\text{NH}_3$ | -34.66 | -       | -     | -          |
| Ni-R017 | $50/67\text{Ni}(\text{H}_2\text{N})_2 + \text{H}_2 = 50/67\text{NiH}_{0.68} + 100/67\text{NH}_3$      | -34.56 | -       | -     | -          |
| Ni-R018 | $2\text{Ni}_2\text{H} + \text{H}_2 = 4\text{NiH}$                                                     | 0.85   | -31.09  | 55.9  | exergonic  |
| Ni-R019 | $2/5\text{Ni}_2\text{H} + \text{H}_2 = 4/5\text{NiH}_3$                                               | 4.26   | -       | -     | -          |
| Ni-R020 | $100/9\text{Ni}_2\text{H} + \text{H}_2 = 200/9\text{NiH}_{0.59}$                                      | 0.15   | -176.57 | -     | exergonic  |
| Ni-R021 | $50/9\text{Ni}_2\text{H} + \text{H}_2 = 100/9\text{NiH}_{0.68}$                                       | 0.31   | -94.42  | 675.3 | exergonic  |
| Ni-R022 | $4\text{Ni}_3\text{H} + \text{H}_2 = 6\text{Ni}_2\text{H}$                                            | 0.28   | -       | -     | -          |
| Ni-R023 | $\text{Ni}_3\text{H} + \text{H}_2 = 3\text{NiH}$                                                      | 1.14   | -       | -     | -          |
| Ni-R024 | $1/4\text{Ni}_3\text{H} + \text{H}_2 = 3/4\text{NiH}_3$                                               | 4.55   | -       | -     | -          |
| Ni-R025 | $4\text{Ni}_3\text{H} + \text{H}_2 = 12\text{NiH}_{0.5}$                                              | 0.28   | -       | -     | -          |
| Ni-R026 | $200/77\text{Ni}_3\text{H} + \text{H}_2 = 600/77\text{NiH}_{0.59}$                                    | 0.44   | -       | -     | -          |
| Ni-R027 | $25/13\text{Ni}_3\text{H} + \text{H}_2 = 75/13\text{NiH}_{0.68}$                                      | 0.59   | -       | -     | -          |
| Ni-R028 | $4/3\text{Ni}_3\text{N} + \text{H}_2 = 2\text{Ni}_2\text{H} + 2/3\text{N}_2$                          | -6.57  | 21.41   | -     | endergonic |
| Ni-R029 | $2\text{Ni}_3\text{N} + \text{H}_2 = 2\text{Ni}_3\text{H} + \text{N}_2$                               | -6.84  | -       | -     | -          |
| Ni-R030 | $2/3\text{Ni}_3\text{N} + \text{H}_2 = 2\text{NiH} + 1/3\text{N}_2$                                   | -5.78  | -4.84   | -     | endergonic |
| Ni-R031 | $2/9\text{Ni}_3\text{N} + \text{H}_2 = 2/3\text{NiH}_3 + 1/9\text{N}_2$                               | -2.6   | -       | -     | -          |
| Ni-R032 | $4/3\text{Ni}_3\text{N} + \text{H}_2 = 4\text{NiH}_{0.5} + 2/3\text{N}_2$                             | -6.57  | -8.7    | -     | exergonic  |
| Ni-R033 | $200/177\text{Ni}_3\text{N} + \text{H}_2 = 200/59\text{NiH}_{0.59} + 100/177\text{N}_2$               | -6.43  | -8.79   | 500.5 | exergonic  |
| Ni-R034 | $50/51\text{Ni}_3\text{N} + \text{H}_2 = 50/17\text{NiH}_{0.68} + 25/51\text{N}_2$                    | -6.29  | -9.25   | 141.6 | exergonic  |
| Ni-R035 | $2/3\text{Ni}_3\text{N} + \text{H}_2 = 2\text{Ni} + 2/3\text{NH}_3$                                   | -7.37  | -31.16  | -     | exergonic  |
| Ni-R036 | $4/9\text{Ni}_3\text{N} + \text{H}_2 = 2/3\text{Ni}_2\text{H} + 4/9\text{NH}_3$                       | -6.57  | -13.26  | 24.1  | exergonic  |
| Ni-R037 | $1/2\text{Ni}_3\text{N} + \text{H}_2 = 1/2\text{Ni}_3\text{H} + 1/2\text{NH}_3$                       | -6.84  | -       | -     | -          |
| Ni-R038 | $1/3\text{Ni}_3\text{N} + \text{H}_2 = \text{NiH} + 1/3\text{NH}_3$                                   | -5.78  | -17.72  | 37.2  | exergonic  |
| Ni-R039 | $1/6\text{Ni}_3\text{N} + \text{H}_2 = 1/2\text{NiH}_3 + 1/6\text{NH}_3$                              | -2.6   | -       | -     | -          |
| Ni-R040 | $8/3\text{Ni}_3\text{N} + \text{H}_2 = 2\text{Ni}_4\text{N} + 2/3\text{NH}_3$                         | -1.84  | -       | -     | -          |
| Ni-R041 | $4/9\text{Ni}_3\text{N} + \text{H}_2 = 4/3\text{NiH}_{0.5} + 4/9\text{NH}_3$                          | -6.57  | -23.3   | 282.4 | exergonic  |

|         |                                                                                          |        |        |       |            |
|---------|------------------------------------------------------------------------------------------|--------|--------|-------|------------|
| Ni-R042 | $200/477\text{Ni}_3\text{N} + \text{H}_2 = 200/159\text{NiH}_0.59 + 200/477\text{NH}_3$  | -6.43  | -22.51 | 223.7 | exergonic  |
| Ni-R043 | $25/63\text{Ni}_3\text{N} + \text{H}_2 = 25/21\text{NiH}_0.68 + 25/63\text{NH}_3$        | -6.29  | -21.96 | 174.6 | exergonic  |
| Ni-R044 | $\text{Ni}_4\text{N} + \text{H}_2 = 2\text{Ni}_2\text{H} + 1/2\text{N}_2$                | -4.82  | -      | -     | -          |
| Ni-R045 | $3/2\text{Ni}_4\text{N} + \text{H}_2 = 2\text{Ni}_3\text{H} + 3/4\text{N}_2$             | -5.09  | -      | -     | -          |
| Ni-R046 | $1/2\text{Ni}_4\text{N} + \text{H}_2 = 2\text{NiH} + 1/4\text{N}_2$                      | -4.01  | -      | -     | -          |
| Ni-R047 | $1/6\text{Ni}_4\text{N} + \text{H}_2 = 2/3\text{NiH}_3 + 1/12\text{N}_2$                 | -0.77  | -      | -     | -          |
| Ni-R048 | $\text{Ni}_4\text{N} + \text{H}_2 = 4\text{NiH}_0.5 + 1/2\text{N}_2$                     | -4.82  | -      | -     | -          |
| Ni-R049 | $50/59\text{Ni}_4\text{N} + \text{H}_2 = 200/59\text{NiH}_0.59 + 25/59\text{N}_2$        | -4.67  | -      | -     | -          |
| Ni-R050 | $25/34\text{Ni}_4\text{N} + \text{H}_2 = 50/17\text{NiH}_0.68 + 25/68\text{N}_2$         | -4.53  | -      | -     | -          |
| Ni-R051 | $2/3\text{Ni}_4\text{N} + \text{H}_2 = 8/3\text{Ni} + 2/3\text{NH}_3$                    | -5.63  | -      | -     | -          |
| Ni-R052 | $2/5\text{Ni}_4\text{N} + \text{H}_2 = 4/5\text{Ni}_2\text{H} + 2/5\text{NH}_3$          | -4.82  | -      | -     | -          |
| Ni-R053 | $6/13\text{Ni}_4\text{N} + \text{H}_2 = 8/13\text{Ni}_3\text{H} + 6/13\text{NH}_3$       | -5.09  | -      | -     | -          |
| Ni-R054 | $2/7\text{Ni}_4\text{N} + \text{H}_2 = 8/7\text{NiH} + 2/7\text{NH}_3$                   | -4.01  | -      | -     | -          |
| Ni-R055 | $2/15\text{Ni}_4\text{N} + \text{H}_2 = 8/15\text{NiH}_3 + 2/15\text{NH}_3$              | -0.77  | -      | -     | -          |
| Ni-R056 | $2/5\text{Ni}_4\text{N} + \text{H}_2 = 8/5\text{NiH}_0.5 + 2/5\text{NH}_3$               | -4.82  | -      | -     | -          |
| Ni-R057 | $25/67\text{Ni}_4\text{N} + \text{H}_2 = 100/67\text{NiH}_0.59 + 25/67\text{NH}_3$       | -4.67  | -      | -     | -          |
| Ni-R058 | $50/143\text{Ni}_4\text{N} + \text{H}_2 = 200/143\text{NiH}_0.68 + 50/143\text{NH}_3$    | -4.53  | -      | -     | -          |
| Ni-R059 | $\text{Ni}_4\text{N}_3 + \text{H}_2 = 2\text{Ni}_2\text{H} + 3/2\text{N}_2$              | -14.45 | -      | -     | -          |
| Ni-R060 | $3/2\text{Ni}_4\text{N}_3 + \text{H}_2 = 2\text{Ni}_3\text{H} + 9/4\text{N}_2$           | -14.7  | -      | -     | -          |
| Ni-R061 | $1/2\text{Ni}_4\text{N}_3 + \text{H}_2 = 2\text{NiH} + 3/4\text{N}_2$                    | -13.72 | -      | -     | -          |
| Ni-R062 | $1/6\text{Ni}_4\text{N}_3 + \text{H}_2 = 2/3\text{NiH}_3 + 1/4\text{N}_2$                | -10.81 | -      | -     | -          |
| Ni-R063 | $\text{Ni}_4\text{N}_3 + \text{H}_2 = 4\text{NiH}_0.5 + 3/2\text{N}_2$                   | -14.45 | -      | -     | -          |
| Ni-R064 | $50/59\text{Ni}_4\text{N}_3 + \text{H}_2 = 200/59\text{NiH}_0.59 + 75/59\text{N}_2$      | -14.32 | -      | -     | -          |
| Ni-R065 | $25/34\text{Ni}_4\text{N}_3 + \text{H}_2 = 50/17\text{NiH}_0.68 + 75/68\text{N}_2$       | -14.19 | -      | -     | -          |
| Ni-R066 | $2/9\text{Ni}_4\text{N}_3 + \text{H}_2 = 8/9\text{Ni} + 2/3\text{NH}_3$                  | -15.18 | -      | -     | -          |
| Ni-R067 | $2/11\text{Ni}_4\text{N}_3 + \text{H}_2 = 4/11\text{Ni}_2\text{H} + 6/11\text{NH}_3$     | -14.45 | -      | -     | -          |
| Ni-R068 | $6/31\text{Ni}_4\text{N}_3 + \text{H}_2 = 8/31\text{Ni}_3\text{H} + 18/31\text{NH}_3$    | -14.7  | -      | -     | -          |
| Ni-R069 | $2/13\text{Ni}_4\text{N}_3 + \text{H}_2 = 8/13\text{NiH} + 6/13\text{NH}_3$              | -13.72 | -      | -     | -          |
| Ni-R070 | $2/21\text{Ni}_4\text{N}_3 + \text{H}_2 = 8/21\text{NiH}_3 + 2/7\text{NH}_3$             | -10.81 | -      | -     | -          |
| Ni-R071 | $2/5\text{Ni}_4\text{N}_3 + \text{H}_2 = 8/15\text{Ni}_3\text{N} + 2/3\text{NH}_3$       | -8.43  | -      | -     | -          |
| Ni-R072 | $1/3\text{Ni}_4\text{N}_3 + \text{H}_2 = 1/3\text{Ni}_4\text{N} + 2/3\text{NH}_3$        | -10.12 | -      | -     | -          |
| Ni-R073 | $2/11\text{Ni}_4\text{N}_3 + \text{H}_2 = 8/11\text{NiH}_0.5 + 6/11\text{NH}_3$          | -14.45 | -      | -     | -          |
| Ni-R074 | $25/142\text{Ni}_4\text{N}_3 + \text{H}_2 = 50/71\text{NiH}_0.59 + 75/142\text{NH}_3$    | -14.32 | -      | -     | -          |
| Ni-R075 | $50/293\text{Ni}_4\text{N}_3 + \text{H}_2 = 200/293\text{NiH}_0.68 + 150/293\text{NH}_3$ | -14.19 | -      | -     | -          |
| Ni-R076 | $\text{NiH} + \text{H}_2 = \text{NiH}_3$                                                 | 3.38   | -      | -     | -          |
| Ni-R077 | $4\text{NiH}_0.5 + \text{H}_2 = 4\text{NiH}$                                             | 0.85   | -0.98  | -     | endergonic |

|         |                                                                                           |        |         |   |            |
|---------|-------------------------------------------------------------------------------------------|--------|---------|---|------------|
| Ni-R078 | $4/5\text{NiH}0.5 + \text{H}_2 = 4/5\text{NiH}_3$                                         | 4.26   | -       | - | -          |
| Ni-R079 | $200/9\text{NiH}0.5 + \text{H}_2 = 200/9\text{NiH}0.59$                                   | 0.15   | -9.31   | - | endergonic |
| Ni-R080 | $100/9\text{NiH}0.5 + \text{H}_2 = 100/9\text{NiH}0.68$                                   | 0.31   | -10.78  | - | endergonic |
| Ni-R081 | $200/41\text{NiH}0.59 + \text{H}_2 = 200/41\text{NiH}$                                    | 0.7    | 0.84    | - | endergonic |
| Ni-R082 | $200/241\text{NiH}0.59 + \text{H}_2 = 200/241\text{NiH}_3$                                | 4.1    | -       | - | -          |
| Ni-R083 | $200/9\text{NiH}0.59 + \text{H}_2 = 200/9\text{NiH}0.68$                                  | 0.15   | -12.26  | - | endergonic |
| Ni-R084 | $25/4\text{NiH}0.68 + \text{H}_2 = 25/4\text{NiH}$                                        | 0.54   | 4.53    | - | endergonic |
| Ni-R085 | $25/29\text{NiH}0.68 + \text{H}_2 = 25/29\text{NiH}_3$                                    | 3.94   | -       | - | -          |
| Ni-R086 | $4\text{NiN} + \text{H}_2 = 2\text{Ni}_2\text{H} + 2\text{N}_2$                           | -18.57 | -218.73 | - | exergonic  |
| Ni-R087 | $6\text{NiN} + \text{H}_2 = 2\text{Ni}_3\text{H} + 3\text{N}_2$                           | -18.8  | -       | - | -          |
| Ni-R088 | $2\text{NiN} + \text{H}_2 = 2\text{NiH} + \text{N}_2$                                     | -17.88 | -124.91 | - | exergonic  |
| Ni-R089 | $2/3\text{NiN} + \text{H}_2 = 2/3\text{NiH}_3 + 1/3\text{N}_2$                            | -15.11 | -       | - | -          |
| Ni-R090 | $4\text{NiN} + \text{H}_2 = 4\text{NiH}0.5 + 2\text{N}_2$                                 | -18.57 | -248.84 | - | exergonic  |
| Ni-R091 | $200/59\text{NiN} + \text{H}_2 = 200/59\text{NiH}0.59 + 100/59\text{N}_2$                 | -18.45 | -212.3  | - | exergonic  |
| Ni-R092 | $50/17\text{NiN} + \text{H}_2 = 50/17\text{NiH}0.68 + 25/17\text{N}_2$                    | -18.32 | -185.83 | - | exergonic  |
| Ni-R093 | $2/3\text{NiN} + \text{H}_2 = 2/3\text{Ni} + 2/3\text{NH}_3$                              | -19.27 | -70.81  | - | exergonic  |
| Ni-R094 | $4/7\text{NiN} + \text{H}_2 = 2/7\text{Ni}_2\text{H} + 4/7\text{NH}_3$                    | -18.57 | -57.47  | - | exergonic  |
| Ni-R095 | $3/5\text{NiN} + \text{H}_2 = 1/5\text{Ni}_3\text{H} + 3/5\text{NH}_3$                    | -18.8  | -       | - | -          |
| Ni-R096 | $1/2\text{NiN} + \text{H}_2 = 1/2\text{NiH} + 1/2\text{NH}_3$                             | -17.88 | -54.18  | - | exergonic  |
| Ni-R097 | $1/3\text{NiN} + \text{H}_2 = 1/3\text{NiH}_3 + 1/3\text{NH}_3$                           | -15.11 | -       | - | -          |
| Ni-R098 | $\text{NiN} + \text{H}_2 = 1/3\text{Ni}_3\text{N} + 2/3\text{NH}_3$                       | -12.84 | -90.63  | - | exergonic  |
| Ni-R099 | $8/9\text{NiN} + \text{H}_2 = 2/9\text{Ni}_4\text{N} + 2/3\text{NH}_3$                    | -14.45 | -       | - | -          |
| Ni-R100 | $8/3\text{NiN} + \text{H}_2 = 2/3\text{Ni}_4\text{N}_3 + 2/3\text{NH}_3$                  | -4.82  | -       | - | -          |
| Ni-R101 | $4/7\text{NiN} + \text{H}_2 = 4/7\text{NiH}0.5 + 4/7\text{NH}_3$                          | -18.57 | -61.78  | - | exergonic  |
| Ni-R102 | $200/359\text{NiN} + \text{H}_2 = 200/359\text{NiH}0.59 + 200/359\text{NH}_3$             | -18.45 | -60.46  | - | exergonic  |
| Ni-R103 | $25/46\text{NiN} + \text{H}_2 = 25/46\text{NiH}0.68 + 25/46\text{NH}_3$                   | -18.32 | -59.28  | - | exergonic  |
| Ni-R104 | $6\text{Ni} + \text{N}_2 = 2\text{Ni}_3\text{N}$                                          | 7.95   | 1.67    | - | endergonic |
| Ni-R105 | $8\text{Ni} + \text{N}_2 = 2\text{Ni}_4\text{N}$                                          | 5.97   | -       | - | -          |
| Ni-R106 | $8/3\text{Ni} + \text{N}_2 = 2/3\text{Ni}_4\text{N}_3$                                    | 17.9   | -       | - | -          |
| Ni-R107 | $2\text{Ni} + \text{N}_2 = 2\text{NiN}$                                                   | 23.86  | 120.63  | - | endergonic |
| Ni-R108 | $24\text{Ni}(\text{H}_2\text{N})_2 + \text{N}_2 = 6\text{Ni}_4\text{N}_3 + 32\text{NH}_3$ | -23.74 | -       | - | -          |
| Ni-R109 | $6\text{Ni}(\text{H}_2\text{N})_2 + \text{N}_2 = 6\text{NiN} + 8\text{NH}_3$              | -19.88 | -       | - | -          |
| Ni-R110 | $3\text{Ni}_2\text{H} + \text{N}_2 = 2\text{Ni}_3\text{N} + 3/2\text{H}_2$                | 7.04   | -32.12  | - | exergonic  |
| Ni-R111 | $4\text{Ni}_2\text{H} + \text{N}_2 = 2\text{Ni}_4\text{N} + 2\text{H}_2$                  | 5.06   | -       | - | -          |
| Ni-R112 | $4/3\text{Ni}_2\text{H} + \text{N}_2 = 2/3\text{Ni}_4\text{N}_3 + 2/3\text{H}_2$          | 16.89  | -       | - | -          |
| Ni-R113 | $\text{Ni}_2\text{H} + \text{N}_2 = 2\text{NiN} + 1/2\text{H}_2$                          | 22.81  | 109.37  | - | endergonic |

|         |                                                                                        |       |         |       |            |
|---------|----------------------------------------------------------------------------------------|-------|---------|-------|------------|
| Ni-R114 | $6\text{Ni}_2\text{H} + \text{N}_2 = 12\text{Ni} + 2\text{NH}_3$                       | -0.85 | -159.38 | -     | exergonic  |
| Ni-R115 | $18\text{Ni}_2\text{H} + \text{N}_2 = 12\text{Ni}_3\text{H} + 2\text{NH}_3$            | -0.28 | -       | -     | -          |
| Ni-R116 | $2\text{Ni}_2\text{H} + \text{N}_2 = 4/3\text{Ni}_3\text{N} + 2/3\text{NH}_3$          | 7.04  | -52.01  | 504.2 | exergonic  |
| Ni-R117 | $12/5\text{Ni}_2\text{H} + \text{N}_2 = 6/5\text{Ni}_4\text{N} + 4/5\text{NH}_3$       | 5.06  | -       | -     | -          |
| Ni-R118 | $12/11\text{Ni}_2\text{H} + \text{N}_2 = 6/11\text{Ni}_4\text{N}_3 + 4/11\text{NH}_3$  | 16.89 | -       | -     | -          |
| Ni-R119 | $6/7\text{Ni}_2\text{H} + \text{N}_2 = 12/7\text{NiN} + 2/7\text{NH}_3$                | 22.81 | 80.63   | -     | endergonic |
| Ni-R120 | $2\text{Ni}_3\text{H} + \text{N}_2 = 2\text{Ni}_3\text{N} + \text{H}_2$                | 7.34  | -       | -     | -          |
| Ni-R121 | $8/3\text{Ni}_3\text{H} + \text{N}_2 = 2\text{Ni}_4\text{N} + 4/3\text{H}_2$           | 5.36  | -       | -     | -          |
| Ni-R122 | $8/9\text{Ni}_3\text{H} + \text{N}_2 = 2/3\text{Ni}_4\text{N}_3 + 4/9\text{H}_2$       | 17.23 | -       | -     | -          |
| Ni-R123 | $2/3\text{Ni}_3\text{H} + \text{N}_2 = 2\text{NiN} + 1/3\text{H}_2$                    | 23.16 | -       | -     | -          |
| Ni-R124 | $6\text{Ni}_3\text{H} + \text{N}_2 = 18\text{Ni} + 2\text{NH}_3$                       | -0.57 | -       | -     | -          |
| Ni-R125 | $3/2\text{Ni}_3\text{H} + \text{N}_2 = 3/2\text{Ni}_3\text{N} + 1/2\text{NH}_3$        | 7.34  | -       | -     | -          |
| Ni-R126 | $24/13\text{Ni}_3\text{H} + \text{N}_2 = 18/13\text{Ni}_4\text{N} + 8/13\text{NH}_3$   | 5.36  | -       | -     | -          |
| Ni-R127 | $24/31\text{Ni}_3\text{H} + \text{N}_2 = 18/31\text{Ni}_4\text{N}_3 + 8/31\text{NH}_3$ | 17.23 | -       | -     | -          |
| Ni-R128 | $3/5\text{Ni}_3\text{H} + \text{N}_2 = 9/5\text{NiN} + 1/5\text{NH}_3$                 | 23.16 | -       | -     | -          |
| Ni-R129 | $8/5\text{Ni}_3\text{N} + \text{N}_2 = 6/5\text{Ni}_4\text{N}_3$                       | 9.21  | -       | -     | -          |
| Ni-R130 | $\text{Ni}_3\text{N} + \text{N}_2 = 3\text{NiN}$                                       | 14.74 | 180.11  | -     | endergonic |
| Ni-R131 | $6\text{Ni}_4\text{N} + \text{N}_2 = 8\text{Ni}_3\text{N}$                             | 1.88  | -       | -     | -          |
| Ni-R132 | $\text{Ni}_4\text{N} + \text{N}_2 = \text{Ni}_4\text{N}_3$                             | 11.26 | -       | -     | -          |
| Ni-R133 | $2/3\text{Ni}_4\text{N} + \text{N}_2 = 8/3\text{NiN}$                                  | 16.89 | -       | -     | -          |
| Ni-R134 | $2\text{Ni}_4\text{N}_3 + \text{N}_2 = 8\text{NiN}$                                    | 5.06  | -       | -     | -          |
| Ni-R135 | $6\text{NiH} + \text{N}_2 = 2\text{Ni}_3\text{N} + 3\text{H}_2$                        | 6.13  | 14.52   | -     | exergonic  |
| Ni-R136 | $8\text{NiH} + \text{N}_2 = 2\text{Ni}_4\text{N} + 4\text{H}_2$                        | 4.18  | -       | -     | -          |
| Ni-R137 | $8/3\text{NiH} + \text{N}_2 = 2/3\text{Ni}_4\text{N}_3 + 4/3\text{H}_2$                | 15.91 | -       | -     | -          |
| Ni-R138 | $2\text{NiH} + \text{N}_2 = 2\text{NiN} + \text{H}_2$                                  | 21.77 | 124.91  | -     | endergonic |
| Ni-R139 | $6\text{NiH} + \text{N}_2 = 6\text{Ni} + 2\text{NH}_3$                                 | -1.69 | -78.95  | -     | exergonic  |
| Ni-R140 | $12\text{NiH} + \text{N}_2 = 6\text{Ni}_2\text{H} + 2\text{NH}_3$                      | -0.84 | 1.49    | -     | exergonic  |
| Ni-R141 | $9\text{NiH} + \text{N}_2 = 3\text{Ni}_3\text{H} + 2\text{NH}_3$                       | -1.13 | -       | -     | -          |
| Ni-R142 | $3\text{NiH} + \text{N}_2 = \text{Ni}_3\text{N} + \text{NH}_3$                         | 6.13  | -38.64  | 721.7 | exergonic  |
| Ni-R143 | $24/7\text{NiH} + \text{N}_2 = 6/7\text{Ni}_4\text{N} + 8/7\text{NH}_3$                | 4.18  | -       | -     | -          |
| Ni-R144 | $24/13\text{NiH} + \text{N}_2 = 6/13\text{Ni}_4\text{N}_3 + 8/13\text{NH}_3$           | 15.91 | -       | -     | -          |
| Ni-R145 | $3/2\text{NiH} + \text{N}_2 = 3/2\text{NiN} + 1/2\text{NH}_3$                          | 21.77 | 70.74   | -     | endergonic |
| Ni-R146 | $12\text{NiH} + \text{N}_2 = 12\text{NiH}_{0.5} + 2\text{NH}_3$                        | -0.84 | -88.84  | -     | exergonic  |
| Ni-R147 | $600/41\text{NiH} + \text{N}_2 = 600/41\text{NiH}_{0.59} + 2\text{NH}_3$               | -0.69 | -94.32  | -     | exergonic  |
| Ni-R148 | $75/4\text{NiH} + \text{N}_2 = 75/4\text{NiH}_{0.68} + 2\text{NH}_3$                   | -0.54 | -105.38 | -     | exergonic  |
| Ni-R149 | $6\text{NiH}_{0.5} + \text{N}_2 = 2\text{Ni}_3\text{N} + 3/2\text{H}_2$                | 7.04  | 13.04   | -     | endergonic |

|         |                                                                                          |       |        |       |            |
|---------|------------------------------------------------------------------------------------------|-------|--------|-------|------------|
| Ni-R150 | $8\text{NiH}0.5 + \text{N}_2 = 2\text{Ni}_4\text{N} + 2\text{H}_2$                       | 5.06  | -      | -     | -          |
| Ni-R151 | $8/3\text{NiH}0.5 + \text{N}_2 = 2/3\text{Ni}_4\text{N}_3 + 2/3\text{H}_2$               | 16.89 | -      | -     | -          |
| Ni-R152 | $2\text{NiH}0.5 + \text{N}_2 = 2\text{NiN} + 1/2\text{H}_2$                              | 22.81 | 124.42 | -     | endergonic |
| Ni-R153 | $12\text{NiH}0.5 + \text{N}_2 = 12\text{Ni} + 2\text{NH}_3$                              | -0.85 | -69.05 | -     | exergonic  |
| Ni-R154 | $36\text{NiH}0.5 + \text{N}_2 = 12\text{Ni}_3\text{H} + 2\text{NH}_3$                    | -0.28 | -      | -     | -          |
| Ni-R155 | $4\text{NiH}0.5 + \text{N}_2 = 4/3\text{Ni}_3\text{N} + 2/3\text{NH}_3$                  | 7.04  | -21.9  | 7.6   | exergonic  |
| Ni-R156 | $24/5\text{NiH}0.5 + \text{N}_2 = 6/5\text{Ni}_4\text{N} + 4/5\text{NH}_3$               | 5.06  | -      | -     | -          |
| Ni-R157 | $24/11\text{NiH}0.5 + \text{N}_2 = 6/11\text{Ni}_4\text{N}_3 + 4/11\text{NH}_3$          | 16.89 | -      | -     | -          |
| Ni-R158 | $12/7\text{NiH}0.5 + \text{N}_2 = 12/7\text{NiN} + 2/7\text{NH}_3$                       | 22.81 | 93.53  | -     | endergonic |
| Ni-R159 | $6\text{NiH}0.59 + \text{N}_2 = 2\text{Ni}_3\text{N} + 177/100\text{H}_2$                | 6.87  | 15.56  | 500.5 | exergonic  |
| Ni-R160 | $8\text{NiH}0.59 + \text{N}_2 = 2\text{Ni}_4\text{N} + 59/25\text{H}_2$                  | 4.9   | -      | -     | -          |
| Ni-R161 | $8/3\text{NiH}0.59 + \text{N}_2 = 2/3\text{Ni}_4\text{N}_3 + 59/75\text{H}_2$            | 16.72 | -      | -     | -          |
| Ni-R162 | $2\text{NiH}0.59 + \text{N}_2 = 2\text{NiN} + 59/100\text{H}_2$                          | 22.62 | 125.26 | -     | endergonic |
| Ni-R163 | $600/59\text{NiH}0.59 + \text{N}_2 = 600/59\text{Ni} + 2\text{NH}_3$                     | -1    | -68.26 | -     | exergonic  |
| Ni-R164 | $200/3\text{NiH}0.59 + \text{N}_2 = 100/3\text{Ni}_2\text{H} + 2\text{NH}_3$             | -0.15 | 437.93 | -     | endergonic |
| Ni-R165 | $1800/77\text{NiH}0.59 + \text{N}_2 = 600/77\text{Ni}_3\text{H} + 2\text{NH}_3$          | -0.44 | -      | -     | -          |
| Ni-R166 | $200/53\text{NiH}0.59 + \text{N}_2 = 200/159\text{Ni}_3\text{N} + 118/159\text{NH}_3$    | 6.87  | -24.28 | 92.5  | exergonic  |
| Ni-R167 | $300/67\text{NiH}0.59 + \text{N}_2 = 75/67\text{Ni}_4\text{N} + 59/67\text{NH}_3$        | 4.9   | -      | -     | -          |
| Ni-R168 | $150/71\text{NiH}0.59 + \text{N}_2 = 75/142\text{Ni}_4\text{N}_3 + 59/142\text{NH}_3$    | 16.72 | -      | -     | -          |
| Ni-R169 | $600/359\text{NiH}0.59 + \text{N}_2 = 600/359\text{NiN} + 118/359\text{NH}_3$            | 22.62 | 89.59  | -     | endergonic |
| Ni-R170 | $200/3\text{NiH}0.59 + \text{N}_2 = 200/3\text{NiH}0.5 + 2\text{NH}_3$                   | -0.15 | -63.87 | -     | exergonic  |
| Ni-R171 | $6\text{NiH}0.68 + \text{N}_2 = 2\text{Ni}_3\text{N} + 51/25\text{H}_2$                  | 6.71  | 18.87  | 141.6 | exergonic  |
| Ni-R172 | $8\text{NiH}0.68 + \text{N}_2 = 2\text{Ni}_4\text{N} + 68/25\text{H}_2$                  | 4.74  | -      | -     | -          |
| Ni-R173 | $8/3\text{NiH}0.68 + \text{N}_2 = 2/3\text{Ni}_4\text{N}_3 + 68/75\text{H}_2$            | 16.54 | -      | -     | -          |
| Ni-R174 | $2\text{NiH}0.68 + \text{N}_2 = 2\text{NiN} + 17/25\text{H}_2$                           | 22.44 | 126.36 | -     | endergonic |
| Ni-R175 | $150/17\text{NiH}0.68 + \text{N}_2 = 150/17\text{Ni} + 2\text{NH}_3$                     | -1.15 | -66.51 | -     | exergonic  |
| Ni-R176 | $100/3\text{NiH}0.68 + \text{N}_2 = 50/3\text{Ni}_2\text{H} + 2\text{NH}_3$              | -0.31 | 191.46 | -     | endergonic |
| Ni-R177 | $225/13\text{NiH}0.68 + \text{N}_2 = 75/13\text{Ni}_3\text{H} + 2\text{NH}_3$            | -0.59 | -      | -     | -          |
| Ni-R178 | $25/7\text{NiH}0.68 + \text{N}_2 = 25/21\text{Ni}_3\text{N} + 17/21\text{NH}_3$          | 6.71  | -25.92 | 206.2 | exergonic  |
| Ni-R179 | $600/143\text{NiH}0.68 + \text{N}_2 = 150/143\text{Ni}_4\text{N} + 136/143\text{NH}_3$   | 4.74  | -      | -     | -          |
| Ni-R180 | $600/293\text{NiH}0.68 + \text{N}_2 = 150/293\text{Ni}_4\text{N}_3 + 136/293\text{NH}_3$ | 16.54 | -      | -     | -          |
| Ni-R181 | $75/46\text{NiH}0.68 + \text{N}_2 = 75/46\text{NiN} + 17/46\text{NH}_3$                  | 22.44 | 86.05  | -     | endergonic |
| Ni-R182 | $100/3\text{NiH}0.68 + \text{N}_2 = 100/3\text{NiH}0.5 + 2\text{NH}_3$                   | -0.31 | -59.44 | -     | exergonic  |
| Ni-R183 | $200/3\text{NiH}0.68 + \text{N}_2 = 200/3\text{NiH}0.59 + 2\text{NH}_3$                  | -0.15 | -55.01 | -     | exergonic  |
| Ni-R184 | $6\text{NiH}_3 + \text{N}_2 = 2\text{Ni}_3\text{N} + 9\text{H}_2$                        | 2.67  | -      | -     | -          |
| Ni-R185 | $8\text{NiH}_3 + \text{N}_2 = 2\text{Ni}_4\text{N} + 12\text{H}_2$                       | 0.77  | -      | -     | -          |

|         |                                                                              |       |   |   |   |
|---------|------------------------------------------------------------------------------|-------|---|---|---|
| Ni-R186 | $8/3\text{NiH}_3 + \text{N}_2 = 2/3\text{Ni}_4\text{N}_3 + 4\text{H}_2$      | 12.12 | - | - | - |
| Ni-R187 | $2\text{NiH}_3 + \text{N}_2 = 2\text{NiN} + 3\text{H}_2$                     | 17.8  | - | - | - |
| Ni-R188 | $2\text{NiH}_3 + \text{N}_2 = 2\text{Ni} + 2\text{NH}_3$                     | -4.9  | - | - | - |
| Ni-R189 | $12/5\text{NiH}_3 + \text{N}_2 = 6/5\text{Ni}_2\text{H} + 2\text{NH}_3$      | -4.08 | - | - | - |
| Ni-R190 | $9/4\text{NiH}_3 + \text{N}_2 = 3/4\text{Ni}_3\text{H} + 2\text{NH}_3$       | -4.36 | - | - | - |
| Ni-R191 | $3\text{NiH}_3 + \text{N}_2 = 3\text{NiH} + 2\text{NH}_3$                    | -3.27 | - | - | - |
| Ni-R192 | $3/2\text{NiH}_3 + \text{N}_2 = 1/2\text{Ni}_3\text{N} + 3/2\text{NH}_3$     | 2.67  | - | - | - |
| Ni-R193 | $8/5\text{NiH}_3 + \text{N}_2 = 2/5\text{Ni}_4\text{N} + 8/5\text{NH}_3$     | 0.77  | - | - | - |
| Ni-R194 | $8/7\text{NiH}_3 + \text{N}_2 = 2/7\text{Ni}_4\text{N}_3 + 8/7\text{NH}_3$   | 12.12 | - | - | - |
| Ni-R195 | $\text{NiH}_3 + \text{N}_2 = \text{NiN} + \text{NH}_3$                       | 17.8  | - | - | - |
| Ni-R196 | $12/5\text{NiH}_3 + \text{N}_2 = 12/5\text{NiH}_{0.5} + 2\text{NH}_3$        | -4.08 | - | - | - |
| Ni-R197 | $600/241\text{NiH}_3 + \text{N}_2 = 600/241\text{NiH}_{0.59} + 2\text{NH}_3$ | -3.94 | - | - | - |
| Ni-R198 | $75/29\text{NiH}_3 + \text{N}_2 = 75/29\text{NiH}_{0.68} + 2\text{NH}_3$     | -3.79 | - | - | - |

Table S24: The Sr-based system

| ID      | Reaction                                                                                     | dm_stoich [%] | h298 [kJ/mol] | T_eq [°C] | Type       |
|---------|----------------------------------------------------------------------------------------------|---------------|---------------|-----------|------------|
| Sr-R001 | $6\text{Sr} + \text{H}_2 = 2\text{Sr}_3\text{H}$                                             | 0.38          | -             | -         | -          |
| Sr-R002 | $\text{Sr} + \text{H}_2 = \text{SrH}_2$                                                      | 2.3           | -180          | -         | exergonic  |
| Sr-R003 | $2/3\text{Sr} + \text{H}_2 = 2/3\text{SrH}_3$                                                | 3.45          | -37.33        | 99.1      | exergonic  |
| Sr-R004 | $\text{Sr}(\text{H}_2\text{N})_2 + \text{H}_2 = \text{Sr} + 2\text{NH}_3$                    | -26.78        | -             | -         | -          |
| Sr-R005 | $6/7\text{Sr}(\text{H}_2\text{N})_2 + \text{H}_2 = 2/7\text{Sr}_3\text{H} + 12/7\text{NH}_3$ | -26.5         | -             | -         | -          |
| Sr-R006 | $1/2\text{Sr}(\text{H}_2\text{N})_2 + \text{H}_2 = 1/2\text{SrH}_2 + \text{NH}_3$            | -25.09        | -             | -         | -          |
| Sr-R007 | $2/5\text{Sr}(\text{H}_2\text{N})_2 + \text{H}_2 = 2/5\text{SrH}_3 + 4/5\text{NH}_3$         | -24.25        | -             | -         | -          |
| Sr-R008 | $2\text{Sr}(\text{H}_2\text{N})_2 + \text{H}_2 = \text{Sr}_2\text{HN} + 3\text{NH}_3$        | -20.51        | -             | -         | -          |
| Sr-R009 | $4\text{Sr}(\text{H}_2\text{N})_2 + \text{H}_2 = 2\text{Sr}_2\text{N} + 6\text{NH}_3$        | -20.93        | -             | -         | -          |
| Sr-R010 | $2/3\text{Sr}_2\text{HN} + \text{H}_2 = 4/3\text{SrH}_2 + 1/3\text{N}_2$                     | -5.77         | -44.91        | 244.9     | exergonic  |
| Sr-R011 | $2/5\text{Sr}_2\text{HN} + \text{H}_2 = 4/5\text{SrH}_3 + 1/5\text{N}_2$                     | -4.71         | 72.26         | -         | endergonic |
| Sr-R012 | $\text{Sr}_2\text{HN} + \text{H}_2 = 2\text{Sr} + \text{NH}_3$                               | -7.89         | 246.74        | -         | endergonic |
| Sr-R013 | $3/4\text{Sr}_2\text{HN} + \text{H}_2 = 1/2\text{Sr}_3\text{H} + 3/4\text{NH}_3$             | -7.54         | -             | -         | -          |
| Sr-R014 | $1/3\text{Sr}_2\text{HN} + \text{H}_2 = 2/3\text{SrH}_2 + 1/3\text{NH}_3$                    | -5.77         | -37.75        | 218       | exergonic  |
| Sr-R015 | $1/4\text{Sr}_2\text{HN} + \text{H}_2 = 1/2\text{SrH}_3 + 1/4\text{NH}_3$                    | -4.71         | 33.69         | -         | endergonic |
| Sr-R016 | $3\text{Sr}_2\text{N} + \text{H}_2 = 2\text{Sr}_3\text{H} + 3/2\text{N}_2$                   | -7.05         | -             | -         | -          |
| Sr-R017 | $1/2\text{Sr}_2\text{N} + \text{H}_2 = \text{SrH}_2 + 1/4\text{N}_2$                         | -5.27         | -82.75        | 523.4     | exergonic  |
| Sr-R018 | $1/3\text{Sr}_2\text{N} + \text{H}_2 = 2/3\text{SrH}_3 + 1/6\text{N}_2$                      | -4.21         | 27.5          | -         | endergonic |
| Sr-R019 | $2\text{Sr}_2\text{N} + \text{H}_2 = 2\text{Sr}_2\text{HN}$                                  | 0.53          | -196.29       | -         | exergonic  |
| Sr-R020 | $2/3\text{Sr}_2\text{N} + \text{H}_2 = 4/3\text{Sr} + 2/3\text{NH}_3$                        | -7.4          | 99.07         | -         | endergonic |
| Sr-R021 | $6/11\text{Sr}_2\text{N} + \text{H}_2 = 4/11\text{Sr}_3\text{H} + 6/11\text{NH}_3$           | -7.05         | -             | -         | -          |
| Sr-R022 | $2/7\text{Sr}_2\text{N} + \text{H}_2 = 4/7\text{SrH}_2 + 2/7\text{NH}_3$                     | -5.27         | -60.4         | 407.8     | exergonic  |
| Sr-R023 | $2/9\text{Sr}_2\text{N} + \text{H}_2 = 4/9\text{SrH}_3 + 2/9\text{NH}_3$                     | -4.21         | 8.13          | -         | endergonic |
| Sr-R024 | $2/5\text{Sr}_3\text{H} + \text{H}_2 = 6/5\text{SrH}_2$                                      | 1.91          | -             | -         | -          |
| Sr-R025 | $1/4\text{Sr}_3\text{H} + \text{H}_2 = 3/4\text{SrH}_3$                                      | 3.06          | -             | -         | -          |
| Sr-R026 | $2\text{Sr}_3\text{N}_2 + \text{H}_2 = 2\text{Sr}_3\text{H} + 2\text{N}_2$                   | -9.28         | -             | -         | -          |
| Sr-R027 | $1/3\text{Sr}_3\text{N}_2 + \text{H}_2 = \text{SrH}_2 + 1/3\text{N}_2$                       | -7.55         | -49.6         | 533.1     | exergonic  |

|         |                                                                                       |        |        |       |            |
|---------|---------------------------------------------------------------------------------------|--------|--------|-------|------------|
| Sr-R028 | $2/9\text{Sr}_3\text{N}_2 + \text{H}_2 = 2/3\text{SrH}_3 + 2/9\text{N}_2$             | -6.51  | 49.6   | -     | endergonic |
| Sr-R029 | $4/3\text{Sr}_3\text{N}_2 + \text{H}_2 = 2\text{Sr}_2\text{HN} + 1/3\text{N}_2$       | -1.89  | -63.67 | -     | exergonic  |
| Sr-R030 | $1/3\text{Sr}_3\text{N}_2 + \text{H}_2 = \text{Sr} + 2/3\text{NH}_3$                  | -9.63  | 99.8   | -     | endergonic |
| Sr-R031 | $2/7\text{Sr}_3\text{N}_2 + \text{H}_2 = 2/7\text{Sr}_3\text{H} + 4/7\text{NH}_3$     | -9.28  | -      | -     | -          |
| Sr-R032 | $1/6\text{Sr}_3\text{N}_2 + \text{H}_2 = 1/2\text{SrH}_2 + 1/3\text{NH}_3$            | -7.55  | -40.1  | 351.5 | exergonic  |
| Sr-R033 | $2/15\text{Sr}_3\text{N}_2 + \text{H}_2 = 2/5\text{SrH}_3 + 4/15\text{NH}_3$          | -6.51  | 17.52  | -     | endergonic |
| Sr-R034 | $2/3\text{Sr}_3\text{N}_2 + \text{H}_2 = \text{Sr}_2\text{HN} + 1/3\text{NH}_3$       | -1.89  | -47.13 | -     | exergonic  |
| Sr-R035 | $4/3\text{Sr}_3\text{N}_2 + \text{H}_2 = 2\text{Sr}_2\text{N} + 2/3\text{NH}_3$       | -2.41  | 102.02 | -     | endergonic |
| Sr-R036 | $3/2\text{Sr}_4\text{N}_3 + \text{H}_2 = 2\text{Sr}_3\text{H} + 9/4\text{N}_2$        | -10.36 | -      | -     | -          |
| Sr-R037 | $1/4\text{Sr}_4\text{N}_3 + \text{H}_2 = \text{SrH}_2 + 3/8\text{N}_2$                | -8.65  | -      | -     | -          |
| Sr-R038 | $1/6\text{Sr}_4\text{N}_3 + \text{H}_2 = 2/3\text{SrH}_3 + 1/4\text{N}_2$             | -7.62  | -      | -     | -          |
| Sr-R039 | $\text{Sr}_4\text{N}_3 + \text{H}_2 = 2\text{Sr}_2\text{HN} + 1/2\text{N}_2$          | -3.06  | -      | -     | -          |
| Sr-R040 | $2/9\text{Sr}_4\text{N}_3 + \text{H}_2 = 8/9\text{Sr} + 2/3\text{NH}_3$               | -10.71 | -      | -     | -          |
| Sr-R041 | $6/31\text{Sr}_4\text{N}_3 + \text{H}_2 = 8/31\text{Sr}_3\text{H} + 18/31\text{NH}_3$ | -10.36 | -      | -     | -          |
| Sr-R042 | $2/17\text{Sr}_4\text{N}_3 + \text{H}_2 = 8/17\text{SrH}_2 + 6/17\text{NH}_3$         | -8.65  | -      | -     | -          |
| Sr-R043 | $2/21\text{Sr}_4\text{N}_3 + \text{H}_2 = 8/21\text{SrH}_3 + 2/7\text{NH}_3$          | -7.62  | -      | -     | -          |
| Sr-R044 | $2/5\text{Sr}_4\text{N}_3 + \text{H}_2 = 4/5\text{Sr}_2\text{HN} + 2/5\text{NH}_3$    | -3.06  | -      | -     | -          |
| Sr-R045 | $2/3\text{Sr}_4\text{N}_3 + \text{H}_2 = 4/3\text{Sr}_2\text{N} + 2/3\text{NH}_3$     | -3.57  | -      | -     | -          |
| Sr-R046 | $2\text{Sr}_4\text{N}_3 + \text{H}_2 = 8/3\text{Sr}_3\text{N}_2 + 2/3\text{NH}_3$     | -1.19  | -      | -     | -          |
| Sr-R047 | $2\text{SrH}_2 + \text{H}_2 = 2\text{SrH}_3$                                          | 1.12   | 248.01 | -     | endergonic |
| Sr-R048 | $2\text{SrHN} + \text{H}_2 = 2\text{SrH}_2 + \text{N}_2$                              | -12.67 | -      | -     | -          |
| Sr-R049 | $\text{SrHN} + \text{H}_2 = \text{SrH}_3 + 1/2\text{N}_2$                             | -11.68 | -      | -     | -          |
| Sr-R050 | $\text{SrHN} + \text{H}_2 = \text{Sr} + \text{NH}_3$                                  | -14.63 | -      | -     | -          |
| Sr-R051 | $6/7\text{SrHN} + \text{H}_2 = 2/7\text{Sr}_3\text{H} + 6/7\text{NH}_3$               | -14.3  | -      | -     | -          |
| Sr-R052 | $1/2\text{SrHN} + \text{H}_2 = 1/2\text{SrH}_2 + 1/2\text{NH}_3$                      | -12.67 | -      | -     | -          |
| Sr-R053 | $2/5\text{SrHN} + \text{H}_2 = 2/5\text{SrH}_3 + 2/5\text{NH}_3$                      | -11.68 | -      | -     | -          |
| Sr-R054 | $2\text{SrHN} + \text{H}_2 = \text{Sr}_2\text{HN} + \text{NH}_3$                      | -7.31  | -      | -     | -          |
| Sr-R055 | $4\text{SrHN} + \text{H}_2 = 2\text{Sr}_2\text{N} + 2\text{NH}_3$                     | -7.81  | -      | -     | -          |
| Sr-R056 | $6\text{SrN} + \text{H}_2 = 2\text{Sr}_3\text{H} + 3\text{N}_2$                       | -13.45 | -      | -     | -          |
| Sr-R057 | $\text{SrN} + \text{H}_2 = \text{SrH}_2 + 1/2\text{N}_2$                              | -11.8  | -50.94 | 640.5 | exergonic  |
| Sr-R058 | $2/3\text{SrN} + \text{H}_2 = 2/3\text{SrH}_3 + 1/3\text{N}_2$                        | -10.81 | 48.71  | -     | endergonic |
| Sr-R059 | $4\text{SrN} + \text{H}_2 = 2\text{Sr}_2\text{HN} + \text{N}_2$                       | -6.4   | -69.05 | -     | exergonic  |
| Sr-R060 | $2\text{SrN} + \text{H}_2 = 2\text{SrHN}$                                             | 0.99   | -      | -     | -          |
| Sr-R061 | $2/3\text{SrN} + \text{H}_2 = 2/3\text{Sr} + 2/3\text{NH}_3$                          | -13.78 | 55.44  | -     | endergonic |
| Sr-R062 | $3/5\text{SrN} + \text{H}_2 = 1/5\text{Sr}_3\text{H} + 3/5\text{NH}_3$                | -13.45 | -      | -     | -          |
| Sr-R063 | $2/5\text{SrN} + \text{H}_2 = 2/5\text{SrH}_2 + 2/5\text{NH}_3$                       | -11.8  | -38.73 | 346.4 | exergonic  |
| Sr-R064 | $1/3\text{SrN} + \text{H}_2 = 1/3\text{SrH}_3 + 1/3\text{NH}_3$                       | -10.81 | 9.06   | -     | endergonic |
| Sr-R065 | $\text{SrN} + \text{H}_2 = 1/2\text{Sr}_2\text{HN} + 1/2\text{NH}_3$                  | -6.4   | -40.21 | 716.8 | exergonic  |
| Sr-R066 | $4/3\text{SrN} + \text{H}_2 = 2/3\text{Sr}_2\text{N} + 2/3\text{NH}_3$                | -6.89  | 11.82  | -     | endergonic |
| Sr-R067 | $2\text{SrN} + \text{H}_2 = 2/3\text{Sr}_3\text{N}_2 + 2/3\text{NH}_3$                | -4.59  | -33.29 | 322.9 | exergonic  |
| Sr-R068 | $8/3\text{SrN} + \text{H}_2 = 2/3\text{Sr}_4\text{N}_3 + 2/3\text{NH}_3$              | -3.45  | -      | -     | -          |
| Sr-R069 | $6\text{SrN}_2 + \text{H}_2 = 2\text{Sr}_3\text{H} + 6\text{N}_2$                     | -23.94 | -      | -     | -          |
| Sr-R070 | $\text{SrN}_2 + \text{H}_2 = \text{SrH}_2 + \text{N}_2$                               | -22.48 | 0.39   | -     | exergonic  |
| Sr-R071 | $2/3\text{SrN}_2 + \text{H}_2 = 2/3\text{SrH}_3 + 2/3\text{N}_2$                      | -21.61 | 82.93  | -     | endergonic |
| Sr-R072 | $1/2\text{SrN}_2 + \text{H}_2 = 1/2\text{Sr}(\text{H}_2\text{N})_2$                   | 3.49   | -      | -     | -          |
| Sr-R073 | $4\text{SrN}_2 + \text{H}_2 = 2\text{Sr}_2\text{HN} + 3\text{N}_2$                    | -17.73 | 136.29 | 99.7  | exergonic  |
| Sr-R074 | $2\text{SrN}_2 + \text{H}_2 = 2\text{SrHN} + \text{N}_2$                              | -11.24 | -      | -     | -          |
| Sr-R075 | $1/3\text{SrN}_2 + \text{H}_2 = 1/3\text{Sr} + 2/3\text{NH}_3$                        | -24.23 | 29.53  | -     | endergonic |
| Sr-R076 | $6/19\text{SrN}_2 + \text{H}_2 = 2/19\text{Sr}_3\text{H} + 12/19\text{NH}_3$          | -23.94 | -      | -     | -          |

|         |                                                                                           |        |         |       |            |
|---------|-------------------------------------------------------------------------------------------|--------|---------|-------|------------|
| Sr-R077 | $1/4\text{SrN}_2 + \text{H}_2 = 1/4\text{SrH}_2 + 1/2\text{NH}_3$                         | -22.48 | -22.85  | 241.3 | exergonic  |
| Sr-R078 | $2/9\text{SrN}_2 + \text{H}_2 = 2/9\text{SrH}_3 + 4/9\text{NH}_3$                         | -21.61 | 7.25    | -     | endergonic |
| Sr-R079 | $2/5\text{SrN}_2 + \text{H}_2 = 1/5\text{Sr}_2\text{HN} + 3/5\text{NH}_3$                 | -17.73 | -13.91  | 278.6 | exergonic  |
| Sr-R080 | $1/2\text{SrN}_2 + \text{H}_2 = 1/2\text{SrHN} + 1/2\text{NH}_3$                          | -11.24 | -       | -     | -          |
| Sr-R081 | $4/9\text{SrN}_2 + \text{H}_2 = 2/9\text{Sr}_2\text{N} + 2/3\text{NH}_3$                  | -18.17 | 6.36    | -     | endergonic |
| Sr-R082 | $1/2\text{SrN}_2 + \text{H}_2 = 1/6\text{Sr}_3\text{N}_2 + 2/3\text{NH}_3$                | -16.15 | -5.6    | -     | endergonic |
| Sr-R083 | $8/15\text{SrN}_2 + \text{H}_2 = 2/15\text{Sr}_4\text{N}_3 + 2/3\text{NH}_3$              | -15.14 | -       | -     | -          |
| Sr-R084 | $2/3\text{SrN}_2 + \text{H}_2 = 2/3\text{SrN} + 2/3\text{NH}_3$                           | -12.11 | 3.63    | -     | endergonic |
| Sr-R085 | $6\text{SrN}_6 + \text{H}_2 = 2\text{Sr}_3\text{H} + 18\text{N}_2$                        | -48.76 | -       | -     | -          |
| Sr-R086 | $\text{SrN}_6 + \text{H}_2 = \text{SrH}_2 + 3\text{N}_2$                                  | -47.78 | -       | -     | -          |
| Sr-R087 | $2/3\text{SrN}_6 + \text{H}_2 = 2/3\text{SrH}_3 + 2\text{N}_2$                            | -47.2  | -       | -     | -          |
| Sr-R088 | $1/2\text{SrN}_6 + \text{H}_2 = 1/2\text{Sr}(\text{H}_2\text{N})_2 + \text{N}_2$          | -30.29 | -       | -     | -          |
| Sr-R089 | $4\text{SrN}_6 + \text{H}_2 = 2\text{Sr}_2\text{HN} + 11\text{N}_2$                       | -44.58 | -       | -     | -          |
| Sr-R090 | $2\text{SrN}_6 + \text{H}_2 = 2\text{SrHN} + 5\text{N}_2$                                 | -40.21 | -       | -     | -          |
| Sr-R091 | $1/9\text{SrN}_6 + \text{H}_2 = 1/9\text{Sr} + 2/3\text{NH}_3$                            | -48.96 | -       | -     | -          |
| Sr-R092 | $6/55\text{SrN}_6 + \text{H}_2 = 2/55\text{Sr}_3\text{H} + 36/55\text{NH}_3$              | -48.76 | -       | -     | -          |
| Sr-R093 | $1/10\text{SrN}_6 + \text{H}_2 = 1/10\text{SrH}_2 + 3/5\text{NH}_3$                       | -47.78 | -       | -     | -          |
| Sr-R094 | $2/21\text{SrN}_6 + \text{H}_2 = 2/21\text{SrH}_3 + 4/7\text{NH}_3$                       | -47.2  | -       | -     | -          |
| Sr-R095 | $1/8\text{SrN}_6 + \text{H}_2 = 1/8\text{Sr}(\text{H}_2\text{N})_2 + 1/2\text{NH}_3$      | -30.29 | -       | -     | -          |
| Sr-R096 | $2/17\text{SrN}_6 + \text{H}_2 = 1/17\text{Sr}_2\text{HN} + 11/17\text{NH}_3$             | -44.58 | -       | -     | -          |
| Sr-R097 | $1/8\text{SrN}_6 + \text{H}_2 = 1/8\text{SrHN} + 5/8\text{NH}_3$                          | -40.21 | -       | -     | -          |
| Sr-R098 | $4/33\text{SrN}_6 + \text{H}_2 = 2/33\text{Sr}_2\text{N} + 2/3\text{NH}_3$                | -44.88 | -       | -     | -          |
| Sr-R099 | $1/8\text{SrN}_6 + \text{H}_2 = 1/24\text{Sr}_3\text{N}_2 + 2/3\text{NH}_3$               | -43.52 | -       | -     | -          |
| Sr-R100 | $8/63\text{SrN}_6 + \text{H}_2 = 2/63\text{Sr}_4\text{N}_3 + 2/3\text{NH}_3$              | -42.84 | -       | -     | -          |
| Sr-R101 | $2/15\text{SrN}_6 + \text{H}_2 = 2/15\text{SrN} + 2/3\text{NH}_3$                         | -40.8  | -       | -     | -          |
| Sr-R102 | $1/6\text{SrN}_6 + \text{H}_2 = 1/6\text{SrN}_2 + 2/3\text{NH}_3$                         | -32.64 | -       | -     | -          |
| Sr-R103 | $4\text{Sr} + \text{N}_2 = 2\text{Sr}_2\text{N}$                                          | 7.99   | -388.99 | -     | exergonic  |
| Sr-R104 | $3\text{Sr} + \text{N}_2 = \text{Sr}_3\text{N}_2$                                         | 10.66  | -391.21 | -     | exergonic  |
| Sr-R105 | $8/3\text{Sr} + \text{N}_2 = 2/3\text{Sr}_4\text{N}_3$                                    | 11.99  | -       | -     | -          |
| Sr-R106 | $2\text{Sr} + \text{N}_2 = 2\text{SrN}$                                                   | 15.99  | -258.12 | -     | exergonic  |
| Sr-R107 | $\text{Sr} + \text{N}_2 = \text{SrN}_2$                                                   | 31.97  | -180.39 | -     | exergonic  |
| Sr-R108 | $1/3\text{Sr} + \text{N}_2 = 1/3\text{SrN}_6$                                             | 95.92  | -       | -     | -          |
| Sr-R109 | $1/2\text{Sr}(\text{H}_2\text{N})_2 + \text{N}_2 = 1/2\text{SrN}_6 + \text{H}_2$          | 43.45  | -       | -     | -          |
| Sr-R110 | $24\text{Sr}(\text{H}_2\text{N})_2 + \text{N}_2 = 6\text{Sr}_4\text{N}_3 + 32\text{NH}_3$ | -18    | -       | -     | -          |
| Sr-R111 | $6\text{Sr}(\text{H}_2\text{N})_2 + \text{N}_2 = 6\text{SrN} + 8\text{NH}_3$              | -15.07 | -       | -     | -          |
| Sr-R112 | $3/2\text{Sr}(\text{H}_2\text{N})_2 + \text{N}_2 = 3/2\text{SrN}_2 + 2\text{NH}_3$        | -3.37  | -       | -     | -          |
| Sr-R113 | $3/8\text{Sr}(\text{H}_2\text{N})_2 + \text{N}_2 = 3/8\text{SrN}_6 + 1/2\text{NH}_3$      | 43.45  | -       | -     | -          |
| Sr-R114 | $6\text{Sr}_2\text{HN} + \text{N}_2 = 4\text{Sr}_3\text{N}_2 + 3\text{H}_2$               | 1.92   | 191.01  | -     | endergonic |
| Sr-R115 | $4\text{Sr}_2\text{HN} + \text{N}_2 = 2\text{Sr}_4\text{N}_3 + 2\text{H}_2$               | 3.15   | -       | -     | -          |
| Sr-R116 | $2\text{Sr}_2\text{HN} + \text{N}_2 = 4\text{SrN} + \text{H}_2$                           | 6.83   | 69.05   | -     | endergonic |
| Sr-R117 | $2/3\text{Sr}_2\text{HN} + \text{N}_2 = 4/3\text{SrN}_2 + 1/3\text{H}_2$                  | 21.56  | -45.43  | 99.7  | exergonic  |
| Sr-R118 | $2/11\text{Sr}_2\text{HN} + \text{N}_2 = 4/11\text{SrN}_6 + 1/11\text{H}_2$               | 80.45  | -       | -     | -          |
| Sr-R119 | $6\text{Sr}_2\text{HN} + \text{N}_2 = 6\text{Sr}_2\text{N} + 2\text{NH}_3$                | -0.53  | 497.08  | -     | endergonic |
| Sr-R120 | $3\text{Sr}_2\text{HN} + \text{N}_2 = 2\text{Sr}_3\text{N}_2 + \text{NH}_3$               | 1.92   | 49.61   | -     | endergonic |
| Sr-R121 | $12/5\text{Sr}_2\text{HN} + \text{N}_2 = 6/5\text{Sr}_4\text{N}_3 + 4/5\text{NH}_3$       | 3.15   | -       | -     | -          |
| Sr-R122 | $3/2\text{Sr}_2\text{HN} + \text{N}_2 = 3\text{SrN} + 1/2\text{NH}_3$                     | 6.83   | 28.84   | -     | endergonic |
| Sr-R123 | $3/5\text{Sr}_2\text{HN} + \text{N}_2 = 6/5\text{SrN}_2 + 1/5\text{NH}_3$                 | 21.56  | -50.07  | 113.3 | exergonic  |
| Sr-R124 | $3/17\text{Sr}_2\text{HN} + \text{N}_2 = 6/17\text{SrN}_6 + 1/17\text{NH}_3$              | 80.45  | -       | -     | -          |
| Sr-R125 | $6\text{Sr}_2\text{N} + \text{N}_2 = 4\text{Sr}_3\text{N}_2$                              | 2.47   | -397.86 | 506.1 | exergonic  |



|         |                                                                                        |       |         |       |            |
|---------|----------------------------------------------------------------------------------------|-------|---------|-------|------------|
| Sr-R126 | $4\text{Sr}_2\text{N} + \text{N}_2 = 2\text{Sr}_4\text{N}_3$                           | 3.7   | -       | -     | -          |
| Sr-R127 | $2\text{Sr}_2\text{N} + \text{N}_2 = 4\text{SrN}$                                      | 7.4   | -127.24 | 368.5 | exergonic  |
| Sr-R128 | $2/3\text{Sr}_2\text{N} + \text{N}_2 = 4/3\text{SrN}_2$                                | 22.2  | -110.86 | 387.7 | exergonic  |
| Sr-R129 | $2/11\text{Sr}_2\text{N} + \text{N}_2 = 4/11\text{SrN}_6$                              | 81.42 | -       | -     | -          |
| Sr-R130 | $4/3\text{Sr}_3\text{H} + \text{N}_2 = 2\text{Sr}_2\text{N} + 2/3\text{H}_2$           | 7.58  | -       | -     | -          |
| Sr-R131 | $\text{Sr}_3\text{H} + \text{N}_2 = \text{Sr}_3\text{N}_2 + 1/2\text{H}_2$             | 10.23 | -       | -     | -          |
| Sr-R132 | $8/9\text{Sr}_3\text{H} + \text{N}_2 = 2/3\text{Sr}_4\text{N}_3 + 4/9\text{H}_2$       | 11.56 | -       | -     | -          |
| Sr-R133 | $2/3\text{Sr}_3\text{H} + \text{N}_2 = 2\text{SrN} + 1/3\text{H}_2$                    | 15.54 | -       | -     | -          |
| Sr-R134 | $1/3\text{Sr}_3\text{H} + \text{N}_2 = \text{SrN}_2 + 1/6\text{H}_2$                   | 31.47 | -       | -     | -          |
| Sr-R135 | $1/9\text{Sr}_3\text{H} + \text{N}_2 = 1/3\text{SrN}_6 + 1/18\text{H}_2$               | 95.17 | -       | -     | -          |
| Sr-R136 | $6\text{Sr}_3\text{H} + \text{N}_2 = 18\text{Sr} + 2\text{NH}_3$                       | -0.38 | -       | -     | -          |
| Sr-R137 | $12/11\text{Sr}_3\text{H} + \text{N}_2 = 18/11\text{Sr}_2\text{N} + 4/11\text{NH}_3$   | 7.58  | -       | -     | -          |
| Sr-R138 | $6/7\text{Sr}_3\text{H} + \text{N}_2 = 6/7\text{Sr}_3\text{N}_2 + 2/7\text{NH}_3$      | 10.23 | -       | -     | -          |
| Sr-R139 | $24/31\text{Sr}_3\text{H} + \text{N}_2 = 18/31\text{Sr}_4\text{N}_3 + 8/31\text{NH}_3$ | 11.56 | -       | -     | -          |
| Sr-R140 | $3/5\text{Sr}_3\text{H} + \text{N}_2 = 9/5\text{SrN} + 1/5\text{NH}_3$                 | 15.54 | -       | -     | -          |
| Sr-R141 | $6/19\text{Sr}_3\text{H} + \text{N}_2 = 18/19\text{SrN}_2 + 2/19\text{NH}_3$           | 31.47 | -       | -     | -          |
| Sr-R142 | $6/55\text{Sr}_3\text{H} + \text{N}_2 = 18/55\text{SrN}_6 + 2/55\text{NH}_3$           | 95.17 | -       | -     | -          |
| Sr-R143 | $8\text{Sr}_3\text{N}_2 + \text{N}_2 = 6\text{Sr}_4\text{N}_3$                         | 1.2   | -       | -     | -          |
| Sr-R144 | $2\text{Sr}_3\text{N}_2 + \text{N}_2 = 6\text{SrN}$                                    | 4.82  | 8.07    | -     | endergonic |
| Sr-R145 | $1/2\text{Sr}_3\text{N}_2 + \text{N}_2 = 3/2\text{SrN}_2$                              | 19.26 | -74.99  | 328.3 | exergonic  |
| Sr-R146 | $1/8\text{Sr}_3\text{N}_2 + \text{N}_2 = 3/8\text{SrN}_6$                              | 77.05 | -       | -     | -          |
| Sr-R147 | $2\text{Sr}_4\text{N}_3 + \text{N}_2 = 8\text{SrN}$                                    | 3.57  | -       | -     | -          |
| Sr-R148 | $2/5\text{Sr}_4\text{N}_3 + \text{N}_2 = 8/5\text{SrN}_2$                              | 17.84 | -       | -     | -          |
| Sr-R149 | $2/21\text{Sr}_4\text{N}_3 + \text{N}_2 = 8/21\text{SrN}_6$                            | 74.94 | -       | -     | -          |
| Sr-R150 | $4\text{SrH}_2 + \text{N}_2 = 2\text{Sr}_2\text{HN} + 3\text{H}_2$                     | 6.13  | 134.72  | 244.9 | exergonic  |
| Sr-R151 | $2\text{SrH}_2 + \text{N}_2 = 2\text{SrHN} + \text{H}_2$                               | 14.5  | -       | -     | -          |
| Sr-R152 | $4\text{SrH}_2 + \text{N}_2 = 2\text{Sr}_2\text{N} + 4\text{H}_2$                      | 5.56  | 331.01  | 523.4 | exergonic  |
| Sr-R153 | $3\text{SrH}_2 + \text{N}_2 = \text{Sr}_3\text{N}_2 + 3\text{H}_2$                     | 8.17  | 148.79  | 533.1 | exergonic  |
| Sr-R154 | $8/3\text{SrH}_2 + \text{N}_2 = 2/3\text{Sr}_4\text{N}_3 + 8/3\text{H}_2$              | 9.47  | -       | -     | -          |
| Sr-R155 | $2\text{SrH}_2 + \text{N}_2 = 2\text{SrN} + 2\text{H}_2$                               | 13.38 | 101.88  | 640.5 | exergonic  |
| Sr-R156 | $\text{SrH}_2 + \text{N}_2 = \text{SrN}_2 + \text{H}_2$                                | 29    | -0.39   | -     | endergonic |
| Sr-R157 | $1/3\text{SrH}_2 + \text{N}_2 = 1/3\text{SrN}_6 + 1/3\text{H}_2$                       | 91.51 | -       | -     | -          |
| Sr-R158 | $3\text{SrH}_2 + \text{N}_2 = 3\text{Sr} + 2\text{NH}_3$                               | -2.25 | 448.2   | -     | endergonic |
| Sr-R159 | $18/5\text{SrH}_2 + \text{N}_2 = 6/5\text{Sr}_3\text{H} + 2\text{NH}_3$                | -1.87 | -       | -     | -          |
| Sr-R160 | $2\text{SrH}_2 + \text{N}_2 = \text{Sr}_2\text{HN} + \text{NH}_3$                      | 6.13  | 21.46   | 442.9 | exergonic  |
| Sr-R161 | $3/2\text{SrH}_2 + \text{N}_2 = 3/2\text{SrHN} + 1/2\text{NH}_3$                       | 14.5  | -       | -     | -          |
| Sr-R162 | $12/7\text{SrH}_2 + \text{N}_2 = 6/7\text{Sr}_2\text{N} + 8/7\text{NH}_3$              | 5.56  | 89.41   | -     | endergonic |
| Sr-R163 | $3/2\text{SrH}_2 + \text{N}_2 = 1/2\text{Sr}_3\text{N}_2 + \text{NH}_3$                | 8.17  | 28.5    | -     | endergonic |
| Sr-R164 | $24/17\text{SrH}_2 + \text{N}_2 = 6/17\text{Sr}_4\text{N}_3 + 16/17\text{NH}_3$        | 9.47  | -       | -     | -          |
| Sr-R165 | $6/5\text{SrH}_2 + \text{N}_2 = 6/5\text{SrN} + 4/5\text{NH}_3$                        | 13.38 | 24.41   | -     | endergonic |
| Sr-R166 | $3/4\text{SrH}_2 + \text{N}_2 = 3/4\text{SrN}_2 + 1/2\text{NH}_3$                      | 29    | -23.24  | 54.3  | exergonic  |
| Sr-R167 | $3/10\text{SrH}_2 + \text{N}_2 = 3/10\text{SrN}_6 + 1/5\text{NH}_3$                    | 91.51 | -       | -     | -          |
| Sr-R168 | $4\text{SrH}_3 + \text{N}_2 = 2\text{Sr}_2\text{HN} + 5\text{H}_2$                     | 4.95  | -361.3  | -     | exergonic  |
| Sr-R169 | $2\text{SrH}_3 + \text{N}_2 = 2\text{SrHN} + 2\text{H}_2$                              | 13.23 | -       | -     | -          |
| Sr-R170 | $4\text{SrH}_3 + \text{N}_2 = 2\text{Sr}_2\text{N} + 6\text{H}_2$                      | 4.39  | -165    | -     | exergonic  |
| Sr-R171 | $3\text{SrH}_3 + \text{N}_2 = \text{Sr}_3\text{N}_2 + 9/2\text{H}_2$                   | 6.97  | -223.22 | -     | exergonic  |
| Sr-R172 | $8/3\text{SrH}_3 + \text{N}_2 = 2/3\text{Sr}_4\text{N}_3 + 4\text{H}_2$                | 8.25  | -       | -     | -          |
| Sr-R173 | $2\text{SrH}_3 + \text{N}_2 = 2\text{SrN} + 3\text{H}_2$                               | 12.12 | -146.12 | -     | exergonic  |
| Sr-R174 | $\text{SrH}_3 + \text{N}_2 = \text{SrN}_2 + 3/2\text{H}_2$                             | 27.57 | -124.4  | -     | exergonic  |

|         |                                                                            |       |         |       |           |
|---------|----------------------------------------------------------------------------|-------|---------|-------|-----------|
| Sr-R175 | $1/3\text{SrH}_3 + \text{N}_2 = 1/3\text{SrN}_6 + 1/2\text{H}_2$           | 89.38 | -       | -     | -         |
| Sr-R176 | $2\text{SrH}_3 + \text{N}_2 = 2\text{Sr} + 2\text{NH}_3$                   | -3.34 | 20.2    | -     | exergonic |
| Sr-R177 | $9/4\text{SrH}_3 + \text{N}_2 = 3/4\text{Sr}_3\text{H} + 2\text{NH}_3$     | -2.97 | -       | -     | -         |
| Sr-R178 | $6\text{SrH}_3 + \text{N}_2 = 6\text{SrH}_2 + 2\text{NH}_3$                | -1.11 | -835.81 | -     | exergonic |
| Sr-R179 | $3/2\text{SrH}_3 + \text{N}_2 = 3/4\text{Sr}_2\text{HN} + 5/4\text{NH}_3$  | 4.95  | -192.86 | -     | exergonic |
| Sr-R180 | $6/5\text{SrH}_3 + \text{N}_2 = 6/5\text{SrHN} + 4/5\text{NH}_3$           | 13.23 | -       | -     | -         |
| Sr-R181 | $4/3\text{SrH}_3 + \text{N}_2 = 2/3\text{Sr}_2\text{N} + 4/3\text{NH}_3$   | 4.39  | -116.2  | -     | exergonic |
| Sr-R182 | $6/5\text{SrH}_3 + \text{N}_2 = 2/5\text{Sr}_3\text{N}_2 + 6/5\text{NH}_3$ | 6.97  | -144.36 | -     | exergonic |
| Sr-R183 | $8/7\text{SrH}_3 + \text{N}_2 = 2/7\text{Sr}_4\text{N}_3 + 8/7\text{NH}_3$ | 8.25  | -       | -     | -         |
| Sr-R184 | $\text{SrH}_3 + \text{N}_2 = \text{SrN} + \text{NH}_3$                     | 12.12 | -118.96 | -     | exergonic |
| Sr-R185 | $2/3\text{SrH}_3 + \text{N}_2 = 2/3\text{SrN}_2 + 2/3\text{NH}_3$          | 27.57 | -113.53 | -     | exergonic |
| Sr-R186 | $2/7\text{SrH}_3 + \text{N}_2 = 2/7\text{SrN}_6 + 2/7\text{NH}_3$          | 89.38 | -       | -     | -         |
| Sr-R187 | $2\text{SrHN} + \text{N}_2 = 2\text{SrN}_2 + \text{H}_2$                   | 12.67 | -       | -     | -         |
| Sr-R188 | $2/5\text{SrHN} + \text{N}_2 = 2/5\text{SrN}_6 + 1/5\text{H}_2$            | 67.25 | -       | -     | -         |
| Sr-R189 | $24\text{SrHN} + \text{N}_2 = 6\text{Sr}_4\text{N}_3 + 8\text{NH}_3$       | -4.39 | -       | -     | -         |
| Sr-R190 | $6\text{SrHN} + \text{N}_2 = 6\text{SrN} + 2\text{NH}_3$                   | -0.98 | -       | -     | -         |
| Sr-R191 | $3/2\text{SrHN} + \text{N}_2 = 3/2\text{SrN}_2 + 1/2\text{NH}_3$           | 12.67 | -       | -     | -         |
| Sr-R192 | $3/8\text{SrHN} + \text{N}_2 = 3/8\text{SrN}_6 + 1/8\text{NH}_3$           | 67.25 | -       | -     | -         |
| Sr-R193 | $2\text{SrN} + \text{N}_2 = 2\text{SrN}_2$                                 | 13.78 | -102.67 | 400.4 | exergonic |
| Sr-R194 | $2/5\text{SrN} + \text{N}_2 = 2/5\text{SrN}_6$                             | 68.91 | -       | -     | -         |
| Sr-R195 | $1/2\text{SrN}_2 + \text{N}_2 = 1/2\text{SrN}_6$                           | 48.45 | -       | -     | -         |

Table S25: The W-based system

| ID    | Reaction                                                                             | dm_stoich [%] | h298 [kJ/mol] | T_eq [°C] | Type       |
|-------|--------------------------------------------------------------------------------------|---------------|---------------|-----------|------------|
| W-R01 | $2/3\text{W}_2\text{N} + \text{H}_2 = 4/3\text{W} + 2/3\text{NH}_3$                  | -3.67         | 64.06         | -         | endergonic |
| W-R02 | $2/9\text{W}_2\text{N}_3 + \text{H}_2 = 4/9\text{W} + 2/3\text{NH}_3$                | -10.26        | -             | -         | -          |
| W-R03 | $1/3\text{W}_2\text{N}_3 + \text{H}_2 = 1/3\text{W}_2\text{N} + 2/3\text{NH}_3$      | -6.84         | -             | -         | -          |
| W-R04 | $2\text{W}_2\text{N}_3 + \text{H}_2 = 4/3\text{W}_3\text{N}_4 + 2/3\text{NH}_3$      | -1.14         | -             | -         | -          |
| W-R05 | $14/27\text{W}_2\text{N}_3 + \text{H}_2 = 4/27\text{W}_7\text{N}_6 + 2/3\text{NH}_3$ | -4.4          | -             | -         | -          |
| W-R06 | $2/3\text{W}_2\text{N}_3 + \text{H}_2 = 4/3\text{WN} + 2/3\text{NH}_3$               | -3.42         | -             | -         | -          |
| W-R07 | $1/6\text{W}_3\text{N}_4 + \text{H}_2 = 1/2\text{W} + 2/3\text{NH}_3$                | -9.22         | -11.95        | 240.2     | exergonic  |
| W-R08 | $4/15\text{W}_3\text{N}_4 + \text{H}_2 = 2/5\text{W}_2\text{N} + 2/3\text{NH}_3$     | -5.76         | -57.55        | -         | exergonic  |
| W-R09 | $7/15\text{W}_3\text{N}_4 + \text{H}_2 = 1/5\text{W}_7\text{N}_6 + 2/3\text{NH}_3$   | -3.29         | -             | -         | -          |
| W-R10 | $2/3\text{W}_3\text{N}_4 + \text{H}_2 = 2\text{WN} + 2/3\text{NH}_3$                 | -2.31         | -23.97        | 164.7     | exergonic  |
| W-R11 | $1/9\text{W}_7\text{N}_6 + \text{H}_2 = 7/9\text{W} + 2/3\text{NH}_3$                | -6.13         | -             | -         | -          |
| W-R12 | $4/15\text{W}_7\text{N}_6 + \text{H}_2 = 14/15\text{W}_2\text{N} + 2/3\text{NH}_3$   | -2.55         | -             | -         | -          |
| W-R13 | $2/3\text{WN} + \text{H}_2 = 2/3\text{W} + 2/3\text{NH}_3$                           | -7.08         | -7.94         | 318.2     | exergonic  |
| W-R14 | $4/3\text{WN} + \text{H}_2 = 2/3\text{W}_2\text{N} + 2/3\text{NH}_3$                 | -3.54         | -79.94        | -         | exergonic  |
| W-R15 | $14/3\text{WN} + \text{H}_2 = 2/3\text{W}_7\text{N}_6 + 2/3\text{NH}_3$              | -1.01         | -             | -         | -          |
| W-R16 | $1/27\text{WN}_18 + \text{H}_2 = 1/27\text{W} + 2/3\text{NH}_3$                      | -57.83        | -             | -         | -          |
| W-R17 | $4/105\text{WN}_18 + \text{H}_2 = 2/105\text{W}_2\text{N} + 2/3\text{NH}_3$          | -56.23        | -             | -         | -          |
| W-    | $4/99\text{WN}_18 + \text{H}_2 = 2/99\text{W}_2\text{N}_3 + 2/3\text{NH}_3$          | -53.01        | -             | -         | -          |

|       |                                       |        |         |       |            |
|-------|---------------------------------------|--------|---------|-------|------------|
| R18   |                                       |        |         |       |            |
| W-R19 | $1/25WN18 + H2 = 1/75W3N4 + 2/3NH3$   | -53.55 | -       | -     | -          |
| W-R20 | $7/180WN18 + H2 = 1/180W7N6 + 2/3NH3$ | -55.08 | -       | -     | -          |
| W-R21 | $2/51WN18 + H2 = 2/51WN + 2/3NH3$     | -54.62 | -       | -     | -          |
| W-R22 | $1/24WN18 + H2 = 1/24WN2 + 2/3NH3$    | -51.41 | -       | -     | -          |
| W-R23 | $1/18WN18 + H2 = 1/18WN6 + 2/3NH3$    | -38.55 | -       | -     | -          |
| W-R24 | $1/3WN2 + H2 = 1/3W + 2/3NH3$         | -13.22 | 8.12    | -     | endergonic |
| W-R25 | $4/9WN2 + H2 = 2/9W2N + 2/3NH3$       | -9.92  | -10.53  | 103.7 | exergonic  |
| W-R26 | $4/3WN2 + H2 = 2/3W2N3 + 2/3NH3$      | -3.31  | -       | -     | -          |
| W-R27 | $WN2 + H2 = 1/3W3N4 + 2/3NH3$         | -4.41  | 48.25   | -     | endergonic |
| W-R28 | $7/12WN2 + H2 = 1/12W7N6 + 2/3NH3$    | -7.56  | -       | -     | -          |
| W-R29 | $2/3WN2 + H2 = 2/3WN + 2/3NH3$        | -6.61  | 24.17   | -     | endergonic |
| W-R30 | $1/9WN6 + H2 = 1/9W + 2/3NH3$         | -31.37 | -       | -     | -          |
| W-R31 | $4/33WN6 + H2 = 2/33W2N + 2/3NH3$     | -28.76 | -       | -     | -          |
| W-R32 | $4/27WN6 + H2 = 2/27W2N3 + 2/3NH3$    | -23.53 | -       | -     | -          |
| W-R33 | $1/7WN6 + H2 = 1/21W3N4 + 2/3NH3$     | -24.4  | -       | -     | -          |
| W-R34 | $7/54WN6 + H2 = 1/54W7N6 + 2/3NH3$    | -26.89 | -       | -     | -          |
| W-R35 | $2/15WN6 + H2 = 2/15WN + 2/3NH3$      | -26.14 | -       | -     | -          |
| W-R36 | $1/6WN6 + H2 = 1/6WN2 + 2/3NH3$       | -20.92 | -       | -     | -          |
| W-R37 | $4W + N2 = 2W2N$                      | 3.81   | -283.98 | -     | exergonic  |
| W-R38 | $4/3W + N2 = 2/3W2N3$                 | 11.43  | -       | -     | -          |
| W-R39 | $3/2W + N2 = 1/2W3N4$                 | 10.16  | -55.95  | 142.3 | exergonic  |
| W-R40 | $7/3W + N2 = 1/3W7N6$                 | 6.53   | -       | -     | -          |
| W-R41 | $2W + N2 = 2WN$                       | 7.62   | -67.97  | 133.2 | exergonic  |
| W-R42 | $1/9W + N2 = 1/9WN18$                 | 137.14 | -       | -     | -          |
| W-R43 | $W + N2 = WN2$                        | 15.24  | -116.14 | -     | exergonic  |
| W-R44 | $1/3W + N2 = 1/3WN6$                  | 45.71  | -       | -     | -          |
| W-R45 | $W2N + N2 = W2N3$                     | 7.34   | -       | -     | -          |
| W-R46 | $6/5W2N + N2 = 4/5W3N4$               | 6.12   | 80.87   | -     | endergonic |
| W-R47 | $14/5W2N + N2 = 4/5W7N6$              | 2.62   | -       | -     | -          |
| W-R48 | $2W2N + N2 = 4WN$                     | 3.67   | 148.03  | -     | endergonic |
| W-R49 | $2/35W2N + N2 = 4/35WN18$             | 128.44 | -       | -     | -          |
| W-R50 | $2/3W2N + N2 = 4/3WN2$                | 11.01  | -60.2   | 298.1 | exergonic  |
| W-R51 | $2/11W2N + N2 = 4/11WN6$              | 40.37  | -       | -     | -          |
| W-R52 | $2/33W2N3 + N2 = 4/33WN18$            | 112.82 | -       | -     | -          |
| W-R53 | $2W2N3 + N2 = 4WN2$                   | 3.42   | -       | -     | -          |

|       |                            |        |         |       |           |
|-------|----------------------------|--------|---------|-------|-----------|
| W-R54 | $2/9W2N3 + N2 = 4/9WN6$    | 30.77  | -       | -     | -         |
| W-R55 | $4W3N4 + N2 = 6W2N3$       | 1.15   | -       | -     | -         |
| W-R56 | $1/25W3N4 + N2 = 3/25WN18$ | 115.27 | -       | -     | -         |
| W-R57 | $W3N4 + N2 = 3WN2$         | 4.61   | -236.53 | -     | exergonic |
| W-R58 | $1/7W3N4 + N2 = 3/7WN6$    | 32.28  | -       | -     | -         |
| W-R59 | $4/9W7N6 + N2 = 14/9W2N3$  | 4.6    | -       | -     | -         |
| W-R60 | $3/5W7N6 + N2 = 7/5W3N4$   | 3.41   | -       | -     | -         |
| W-R61 | $2W7N6 + N2 = 14WN$        | 1.02   | -       | -     | -         |
| W-R62 | $1/60W7N6 + N2 = 7/60WN18$ | 122.61 | -       | -     | -         |
| W-R63 | $1/4W7N6 + N2 = 7/4WN2$    | 8.17   | -       | -     | -         |
| W-R64 | $1/18W7N6 + N2 = 7/18WN6$  | 36.78  | -       | -     | -         |
| W-R65 | $4WN + N2 = 2W2N3$         | 3.54   | -       | -     | -         |
| W-R66 | $6WN + N2 = 2W3N4$         | 2.36   | -19.88  | 338.5 | exergonic |
| W-R67 | $2/17WN + N2 = 2/17WN18$   | 120.36 | -       | -     | -         |
| W-R68 | $2WN + N2 = 2WN2$          | 7.08   | -164.31 | -     | exergonic |
| W-R69 | $2/5WN + N2 = 2/5WN6$      | 35.4   | -       | -     | -         |
| W-R70 | $1/8WN2 + N2 = 1/8WN18$    | 105.79 | -       | -     | -         |
| W-R71 | $1/2WN2 + N2 = 1/2WN6$     | 26.45  | -       | -     | -         |
| W-R72 | $1/6WN6 + N2 = 1/6WN18$    | 62.75  | -       | -     | -         |

Table S26: The Zn-based system

| ID     | Reaction                                    | dm_stoich [%] | h298 [kJ/mol] | T_eq [°C] | Type |
|--------|---------------------------------------------|---------------|---------------|-----------|------|
| Zn-R01 | $2Zn + H2 = 2ZnH$                           | 1.54          | -             | -         | -    |
| Zn-R02 | $1/3Zn + H2 = 1/3ZnH6$                      | 9.25          | -             | -         | -    |
| Zn-R03 | $1/9Zn(H15N8)2 + H2 = 1/9Zn + 16/9NH3$      | -79.55        | -             | -         | -    |
| Zn-R04 | $2/19Zn(H15N8)2 + H2 = 2/19ZnH + 32/19NH3$  | -79.24        | -             | -         | -    |
| Zn-R05 | $1/12Zn(H15N8)2 + H2 = 1/12ZnH6 + 4/3NH3$   | -77.66        | -             | -         | -    |
| Zn-R06 | $1/8Zn(H15N8)2 + H2 = 1/8Zn(H2N)2 + 7/4NH3$ | -69.53        | -             | -         | -    |
| Zn-R07 | $2/17Zn(H15N8)2 + H2 = 2/51Zn3N + 94/51NH3$ | -78.09        | -             | -         | -    |
| Zn-R08 | $1/8Zn(H15N8)2 + H2 = 1/24Zn3N2 + 23/12NH3$ | -76.63        | -             | -         | -    |
| Zn-R09 | $2/15Zn(H15N8)2 + H2 = 2/15ZnN + 2NH3$      | -75.17        | -             | -         | -    |
| Zn-R10 | Improbable stoichiometric coefficients      | -53.27        | -             | -         | -    |
| Zn-R11 | $Zn(H2N)2 + H2 = ZnH6 + N2$                 | -26.68        | -             | -         | -    |
| Zn-R12 | $Zn(H2N)2 + H2 = Zn + 2NH3$                 | -32.89        | -             | -         | -    |
| Zn-R13 | $2/3Zn(H2N)2 + H2 = 2/3ZnH + 4/3NH3$        | -31.86        | -             | -         | -    |
| Zn-R14 | $1/4Zn(H2N)2 + H2 = 1/4ZnH6 + 1/2NH3$       | -26.68        | -             | -         | -    |

|        |                                                                                                             |        |         |   |           |
|--------|-------------------------------------------------------------------------------------------------------------|--------|---------|---|-----------|
| Zn-R15 | $2\text{Zn}(\text{H}_2\text{N})_2 + \text{H}_2 = 2/3\text{Zn}_3\text{N} + 10/3\text{NH}_3$                  | -28.1  | -       | - | -         |
| Zn-R16 | $1/11\text{Zn}(\text{H}_4\text{N}_5)_2 + \text{H}_2 = 1/11\text{Zn} + 10/11\text{NH}_3$                     | -69.38 | -       | - | -         |
| Zn-R17 | $2/23\text{Zn}(\text{H}_4\text{N}_5)_2 + \text{H}_2 = 2/23\text{ZnH} + 20/23\text{NH}_3$                    | -68.91 | -       | - | -         |
| Zn-R18 | $1/14\text{Zn}(\text{H}_4\text{N}_5)_2 + \text{H}_2 = 1/14\text{ZnH}_6 + 5/7\text{NH}_3$                    | -66.55 | -       | - | -         |
| Zn-R19 | $1/10\text{Zn}(\text{H}_4\text{N}_5)_2 + \text{H}_2 = 1/10\text{Zn}(\text{H}_2\text{N})_2 + 4/5\text{NH}_3$ | -54.37 | -       | - | -         |
| Zn-R20 | $2/21\text{Zn}(\text{H}_4\text{N}_5)_2 + \text{H}_2 = 2/63\text{Zn}_3\text{N} + 58/63\text{NH}_3$           | -67.19 | -       | - | -         |
| Zn-R21 | $1/10\text{Zn}(\text{H}_4\text{N}_5)_2 + \text{H}_2 = 1/30\text{Zn}_3\text{N}_2 + 14/15\text{NH}_3$         | -65.01 | -       | - | -         |
| Zn-R22 | $2/19\text{Zn}(\text{H}_4\text{N}_5)_2 + \text{H}_2 = 2/19\text{ZnN} + 18/19\text{NH}_3$                    | -62.82 | -       | - | -         |
| Zn-R23 | $1/2\text{Zn}(\text{H}_4\text{N}_5)_2 + \text{H}_2 = 1/2\text{ZnN}_6 + 2\text{NH}_3$                        | -30.02 | -       | - | -         |
| Zn-R24 | $2/3\text{Zn}_3\text{N} + \text{H}_2 = 2\text{ZnH} + 1/3\text{N}_2$                                         | -5.23  | -       | - | -         |
| Zn-R25 | $1/9\text{Zn}_3\text{N} + \text{H}_2 = 1/3\text{ZnH}_6 + 1/18\text{N}_2$                                    | 1.97   | -       | - | -         |
| Zn-R26 | $2/3\text{Zn}_3\text{N} + \text{H}_2 = 2\text{Zn} + 2/3\text{NH}_3$                                         | -6.67  | -       | - | -         |
| Zn-R27 | $1/3\text{Zn}_3\text{N} + \text{H}_2 = \text{ZnH} + 1/3\text{NH}_3$                                         | -5.23  | -       | - | -         |
| Zn-R28 | $2/21\text{Zn}_3\text{N} + \text{H}_2 = 2/7\text{ZnH}_6 + 2/21\text{NH}_3$                                  | 1.97   | -       | - | -         |
| Zn-R29 | $2/3\text{Zn}_3\text{N}_2 + \text{H}_2 = 2\text{ZnH} + 2/3\text{N}_2$                                       | -11.15 | -       | - | -         |
| Zn-R30 | $1/9\text{Zn}_3\text{N}_2 + \text{H}_2 = 1/3\text{ZnH}_6 + 1/9\text{N}_2$                                   | -4.4   | -       | - | -         |
| Zn-R31 | $1/3\text{Zn}_3\text{N}_2 + \text{H}_2 = \text{Zn} + 2/3\text{NH}_3$                                        | -12.5  | -23.21  | - | exergonic |
| Zn-R32 | $2/9\text{Zn}_3\text{N}_2 + \text{H}_2 = 2/3\text{ZnH} + 4/9\text{NH}_3$                                    | -11.15 | -       | - | -         |
| Zn-R33 | $1/12\text{Zn}_3\text{N}_2 + \text{H}_2 = 1/4\text{ZnH}_6 + 1/6\text{NH}_3$                                 | -4.4   | -       | - | -         |
| Zn-R34 | $2/3\text{Zn}_3\text{N}_2 + \text{H}_2 = 2/3\text{Zn}_3\text{N} + 2/3\text{NH}_3$                           | -6.25  | -       | - | -         |
| Zn-R35 | $2/5\text{ZnH} + \text{H}_2 = 2/5\text{ZnH}_6$                                                              | 7.59   | -       | - | -         |
| Zn-R36 | $2\text{ZnN} + \text{H}_2 = 2\text{ZnH} + \text{N}_2$                                                       | -16.37 | -       | - | -         |
| Zn-R37 | $1/3\text{ZnN} + \text{H}_2 = 1/3\text{ZnH}_6 + 1/6\text{N}_2$                                              | -10.03 | -       | - | -         |
| Zn-R38 | $2/3\text{ZnN} + \text{H}_2 = 2/3\text{Zn} + 2/3\text{NH}_3$                                                | -17.64 | -97.49  | - | exergonic |
| Zn-R39 | $1/2\text{ZnN} + \text{H}_2 = 1/2\text{ZnH} + 1/2\text{NH}_3$                                               | -16.37 | -       | - | -         |
| Zn-R40 | $2/9\text{ZnN} + \text{H}_2 = 2/9\text{ZnH}_6 + 2/9\text{NH}_3$                                             | -10.03 | -       | - | -         |
| Zn-R41 | $\text{ZnN} + \text{H}_2 = 1/3\text{Zn}_3\text{N} + 2/3\text{NH}_3$                                         | -11.76 | -       | - | -         |
| Zn-R42 | $2\text{ZnN} + \text{H}_2 = 2/3\text{Zn}_3\text{N}_2 + 2/3\text{NH}_3$                                      | -5.88  | -246.07 | - | exergonic |
| Zn-R43 | $2\text{ZnN}_6 + \text{H}_2 = 2\text{ZnH} + 6\text{N}_2$                                                    | -55.57 | -       | - | -         |
| Zn-R44 | $1/3\text{ZnN}_6 + \text{H}_2 = 1/3\text{ZnH}_6 + \text{N}_2$                                               | -52.2  | -       | - | -         |
| Zn-R45 | $1/2\text{ZnN}_6 + \text{H}_2 = 1/2\text{Zn}(\text{H}_2\text{N})_2 + \text{N}_2$                            | -34.8  | -       | - | -         |
| Zn-R46 | $1/9\text{ZnN}_6 + \text{H}_2 = 1/9\text{Zn} + 2/3\text{NH}_3$                                              | -56.24 | -       | - | -         |
| Zn-R47 | $2/19\text{ZnN}_6 + \text{H}_2 = 2/19\text{ZnH} + 12/19\text{NH}_3$                                         | -55.57 | -       | - | -         |
| Zn-R48 | $1/12\text{ZnN}_6 + \text{H}_2 = 1/12\text{ZnH}_6 + 1/2\text{NH}_3$                                         | -52.2  | -       | - | -         |
| Zn-R49 | $1/8\text{ZnN}_6 + \text{H}_2 = 1/8\text{Zn}(\text{H}_2\text{N})_2 + 1/2\text{NH}_3$                        | -34.8  | -       | - | -         |
| Zn-R50 | $2/17\text{ZnN}_6 + \text{H}_2 = 2/51\text{Zn}_3\text{N} + 2/3\text{NH}_3$                                  | -53.12 | -       | - | -         |

|        |                                                                                                             |        |        |   |            |
|--------|-------------------------------------------------------------------------------------------------------------|--------|--------|---|------------|
| Zn-R51 | $1/8\text{ZnN}_6 + \text{H}_2 = 1/24\text{Zn}_3\text{N}_2 + 2/3\text{NH}_3$                                 | -50    | -      | - | -          |
| Zn-R52 | $2/15\text{ZnN}_6 + \text{H}_2 = 2/15\text{ZnN} + 2/3\text{NH}_3$                                           | -46.87 | -      | - | -          |
| Zn-R53 | $6\text{Zn} + \text{N}_2 = 2\text{Zn}_3\text{N}$                                                            | 7.14   | -      | - | -          |
| Zn-R54 | $3\text{Zn} + \text{N}_2 = \text{Zn}_3\text{N}_2$                                                           | 14.28  | -22.17 | - | endergonic |
| Zn-R55 | $2\text{Zn} + \text{N}_2 = 2\text{ZnN}$                                                                     | 21.42  | 200.69 | - | endergonic |
| Zn-R56 | $1/3\text{Zn} + \text{N}_2 = 1/3\text{ZnN}_6$                                                               | 128.54 | -      | - | -          |
| Zn-R57 | $3/2\text{Zn}(\text{H}_15\text{N}_8)_2 + \text{N}_2 = 3/2\text{Zn}(\text{H}_4\text{N}_5)_2 + 11\text{NH}_3$ | -33.22 | -      | - | -          |
| Zn-R58 | $1/2\text{Zn}(\text{H}_2\text{N})_2 + \text{N}_2 = 1/2\text{ZnN}_6 + \text{H}_2$                            | 53.37  | -      | - | -          |
| Zn-R59 | $6\text{Zn}(\text{H}_2\text{N})_2 + \text{N}_2 = 6\text{ZnN} + 8\text{NH}_3$                                | -18.52 | -      | - | -          |
| Zn-R60 | $3/8\text{Zn}(\text{H}_2\text{N})_2 + \text{N}_2 = 3/8\text{ZnN}_6 + 1/2\text{NH}_3$                        | 53.37  | -      | - | -          |
| Zn-R61 | $2\text{Zn}_3\text{N} + \text{N}_2 = 2\text{Zn}_3\text{N}_2$                                                | 6.67   | -      | - | -          |
| Zn-R62 | $\text{Zn}_3\text{N} + \text{N}_2 = 3\text{ZnN}$                                                            | 13.33  | -      | - | -          |
| Zn-R63 | $2/17\text{Zn}_3\text{N} + \text{N}_2 = 6/17\text{ZnN}_6$                                                   | 113.31 | -      | - | -          |
| Zn-R64 | $2\text{Zn}_3\text{N}_2 + \text{N}_2 = 6\text{ZnN}$                                                         | 6.25   | 646.42 | - | endergonic |
| Zn-R65 | $1/8\text{Zn}_3\text{N}_2 + \text{N}_2 = 3/8\text{ZnN}_6$                                                   | 99.98  | -      | - | -          |
| Zn-R66 | $6\text{ZnH} + \text{N}_2 = 2\text{Zn}_3\text{N} + 3\text{H}_2$                                             | 5.51   | -      | - | -          |
| Zn-R67 | $3\text{ZnH} + \text{N}_2 = \text{Zn}_3\text{N}_2 + 3/2\text{H}_2$                                          | 12.55  | -      | - | -          |
| Zn-R68 | $2\text{ZnH} + \text{N}_2 = 2\text{ZnN} + \text{H}_2$                                                       | 19.58  | -      | - | -          |
| Zn-R69 | $1/3\text{ZnH} + \text{N}_2 = 1/3\text{ZnN}_6 + 1/6\text{H}_2$                                              | 125.07 | -      | - | -          |
| Zn-R70 | $6\text{ZnH} + \text{N}_2 = 6\text{Zn} + 2\text{NH}_3$                                                      | -1.52  | -      | - | -          |
| Zn-R71 | $3\text{ZnH} + \text{N}_2 = \text{Zn}_3\text{N} + \text{NH}_3$                                              | 5.51   | -      | - | -          |
| Zn-R72 | $2\text{ZnH} + \text{N}_2 = 2/3\text{Zn}_3\text{N}_2 + 2/3\text{NH}_3$                                      | 12.55  | -      | - | -          |
| Zn-R73 | $3/2\text{ZnH} + \text{N}_2 = 3/2\text{ZnN} + 1/2\text{NH}_3$                                               | 19.58  | -      | - | -          |
| Zn-R74 | $6/19\text{ZnH} + \text{N}_2 = 6/19\text{ZnN}_6 + 2/19\text{NH}_3$                                          | 125.07 | -      | - | -          |
| Zn-R75 | $\text{ZnH}_6 + \text{N}_2 = \text{Zn}(\text{H}_2\text{N})_2 + \text{H}_2$                                  | 36.4   | -      | - | -          |
| Zn-R76 | $6\text{ZnH}_6 + \text{N}_2 = 2\text{Zn}_3\text{N} + 18\text{H}_2$                                          | -1.93  | -      | - | -          |
| Zn-R77 | $3\text{ZnH}_6 + \text{N}_2 = \text{Zn}_3\text{N}_2 + 9\text{H}_2$                                          | 4.61   | -      | - | -          |
| Zn-R78 | $2\text{ZnH}_6 + \text{N}_2 = 2\text{ZnN} + 6\text{H}_2$                                                    | 11.14  | -      | - | -          |
| Zn-R79 | $1/3\text{ZnH}_6 + \text{N}_2 = 1/3\text{ZnN}_6 + \text{H}_2$                                               | 109.19 | -      | - | -          |
| Zn-R80 | $\text{ZnH}_6 + \text{N}_2 = \text{Zn} + 2\text{NH}_3$                                                      | -8.47  | -      | - | -          |
| Zn-R81 | $6/5\text{ZnH}_6 + \text{N}_2 = 6/5\text{ZnH} + 2\text{NH}_3$                                               | -7.06  | -      | - | -          |
| Zn-R82 | $3/4\text{ZnH}_6 + \text{N}_2 = 3/4\text{Zn}(\text{H}_2\text{N})_2 + 1/2\text{NH}_3$                        | 36.4   | -      | - | -          |
| Zn-R83 | $6/7\text{ZnH}_6 + \text{N}_2 = 2/7\text{Zn}_3\text{N} + 12/7\text{NH}_3$                                   | -1.93  | -      | - | -          |
| Zn-R84 | $3/4\text{ZnH}_6 + \text{N}_2 = 1/4\text{Zn}_3\text{N}_2 + 3/2\text{NH}_3$                                  | 4.61   | -      | - | -          |
| Zn-R85 | $2/3\text{ZnH}_6 + \text{N}_2 = 2/3\text{ZnN} + 4/3\text{NH}_3$                                             | 11.14  | -      | - | -          |
| Zn-R86 | $1/4\text{ZnH}_6 + \text{N}_2 = 1/4\text{ZnN}_6 + 1/2\text{NH}_3$                                           | 109.19 | -      | - | -          |

|        |                                                |       |   |   |   |
|--------|------------------------------------------------|-------|---|---|---|
| Zn-R87 | $2/5\text{ZnN} + \text{N}_2 = 2/5\text{ZnN}_6$ | 88.22 | - | - | - |
|--------|------------------------------------------------|-------|---|---|---|

### 1.5 Nitridation and hydrogenation reactions for the ideal cycle II

Table S27: Nitridation reactions examined in the Ellingham diagram of Figure 2a.

| ID      | Reaction                                             | dm_stoich [%] | h298 [kJ/mol] | T_eq [°C] | Type       |
|---------|------------------------------------------------------|---------------|---------------|-----------|------------|
| Al-R20  | $2\text{Al} + \text{N}_2 = 2\text{AlN}$              | 51.91         | -635.97       | -         | exergonic  |
| Ca-R125 | $4\text{Ca} + \text{N}_2 = 2\text{Ca}_2\text{N}$     | 17.47         | -519.68       | -         | exergonic  |
| Co-R081 | $6\text{Co} + \text{N}_2 = 2\text{Co}_3\text{N}$     | 7.92          | 16.74         | -         | endergonic |
| Cr-R066 | $4\text{Cr} + \text{N}_2 = 2\text{Cr}_2\text{N}$     | 13.47         | -251.04       | -         | exergonic  |
| Cu-R48  | $2/3\text{Cu} + \text{N}_2 = 2/3\text{Cu}_3\text{N}$ | 66.13         | 75.6          | -         | endergonic |
| Fe-R131 | $6\text{Fe} + \text{N}_2 = 2\text{Fe}_3\text{N}$     | 8.36          | -121.76       | 218.7     | exergonic  |
| Li-R102 | $6\text{Li} + \text{N}_2 = 2\text{Li}_3\text{N}$     | 67.28         | -329.11       | -         | exergonic  |
| Mn-R52  | $8\text{Mn} + \text{N}_2 = 2\text{Mn}_4\text{N}$     | 6.37          | -257.33       | -         | exergonic  |
| Mo-R058 | $4\text{Mo} + \text{N}_2 = 2\text{Mo}_2\text{N}$     | 7.30          | -163.18       | 686.8     | exergonic  |
| Ni-R104 | $6\text{Ni} + \text{N}_2 = 2\text{Ni}_3\text{N}$     | 7.95          | 1.67          | -         | endergonic |
| Sr-R103 | $4\text{Sr} + \text{N}_2 = 2\text{Sr}_2\text{N}$     | 7.99          | -388.99       | -         | exergonic  |
| W-R37   | $4\text{W} + \text{N}_2 = 2\text{W}_2\text{N}$       | 3.81          | -283.98       | -         | exergonic  |
| Zn-R54  | $3\text{Zn} + \text{N}_2 = \text{Zn}_3\text{N}_2$    | 14.28         | -22.17        | -         | endergonic |

Table S28: Hydrogenation reactions examined in the Ellingham diagram of Figure 2b.

| ID      | Reaction                                                              | dm_stoich [%] | h298 [kJ/mol] | T_eq [°C] | Type       |
|---------|-----------------------------------------------------------------------|---------------|---------------|-----------|------------|
| Al-R15  | $2/3\text{AlN} + \text{H}_2 = 2/3\text{Al} + 2/3\text{NH}_3$          | -34.17        | 181.39        | -         | endergonic |
| Ca-R040 | $2/3\text{Ca}_2\text{N} + \text{H}_2 = 4/3\text{Ca} + 2/3\text{NH}_3$ | -14.88        | 142.63        | -         | endergonic |
| Co-R022 | $2/3\text{Co}_3\text{N} + \text{H}_2 = 2\text{Co} + 2/3\text{NH}_3$   | -7.34         | -36.18        | -         | exergonic  |
| Cr-R009 | $2/3\text{Cr}_2\text{N} + \text{H}_2 = 4/3\text{Cr} + 2/3\text{NH}_3$ | -11.87        | 53.08         | -         | endergonic |
| Cu-R21  | $2/9\text{Cu}_3\text{N} + \text{H}_2 = 2/9\text{Cu} + 2/3\text{NH}_3$ | -39.81        | -55.8         | -         | exergonic  |
| Fe-R054 | $2/3\text{Fe}_3\text{N} + \text{H}_2 = 2\text{Fe} + 2/3\text{NH}_3$   | -7.72         | 9.99          | 415.8     | exergonic  |
| Li-R033 | $2/3\text{Li}_3\text{N} + \text{H}_2 = 2\text{Li} + 2/3\text{NH}_3$   | -40.22        | 79.11         | -         | endergonic |
| Mn-R36  | $2/3\text{Mn}_4\text{N} + \text{H}_2 = 8/3\text{Mn} + 2/3\text{NH}_3$ | -5.99         | 55.18         | -         | endergonic |
| Mo-R016 | $2/3\text{Mo}_2\text{N} + \text{H}_2 = 4/3\text{Mo} + 2/3\text{NH}_3$ | -6.80         | 23.79         | -         | endergonic |
| Ni-R035 | $2/3\text{Ni}_3\text{N} + \text{H}_2 = 2\text{Ni} + 2/3\text{NH}_3$   | -7.37         | -31.16        | -         | exergonic  |
| Sr-R020 | $2/3\text{Sr}_2\text{N} + \text{H}_2 = 4/3\text{Sr} + 2/3\text{NH}_3$ | -7.40         | 99.07         | -         | endergonic |
| W-R01   | $2/3\text{W}_2\text{N} + \text{H}_2 = 4/3\text{W} + 2/3\text{NH}_3$   | -3.67         | 64.06         | -         | endergonic |
| Zn-R31  | $1/3\text{Zn}_3\text{N}_2 + \text{H}_2 = \text{Zn} + 2/3\text{NH}_3$  | -12.50        | -23.21        | -         | exergonic  |

### 1.6 Ellingham diagrams

Ellingham diagrams of all identified reactions (see Section 1.4 Reactions): standard Gibbs free energy change per mol of  $\text{N}_2$  (nitridation) and per mole of  $\text{H}_2$  (hydrogenation) as a function of temperature. Dashed lines indicate species from the MP database with an  $E_{hull}$  greater than 0, i.e. potentially unstable at standard conditions.

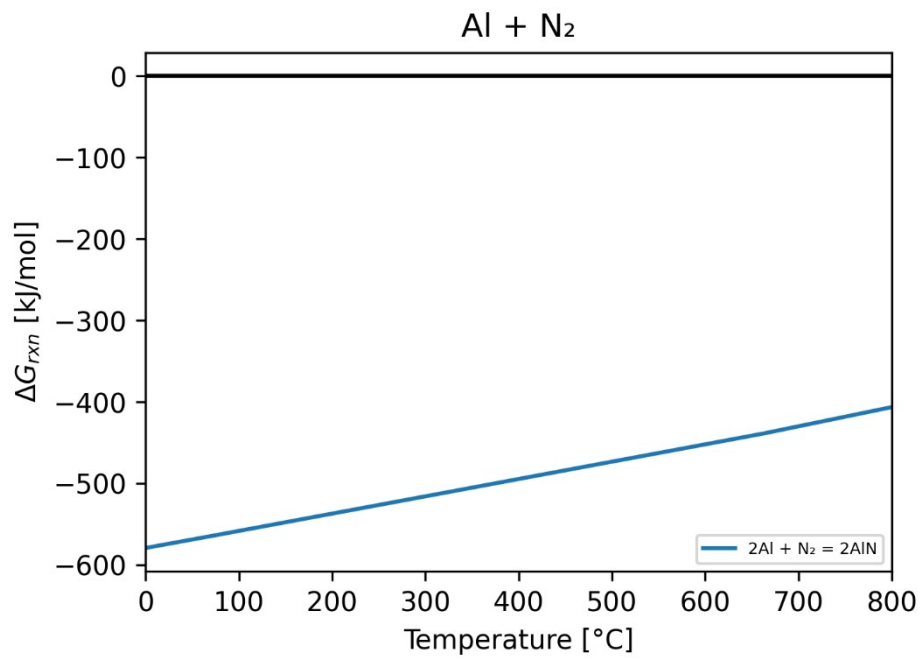

Figure S2: Ellingham diagram of the Al nitridation step: standard Gibbs free energy change per mol N<sub>2</sub> as a function of temperature.

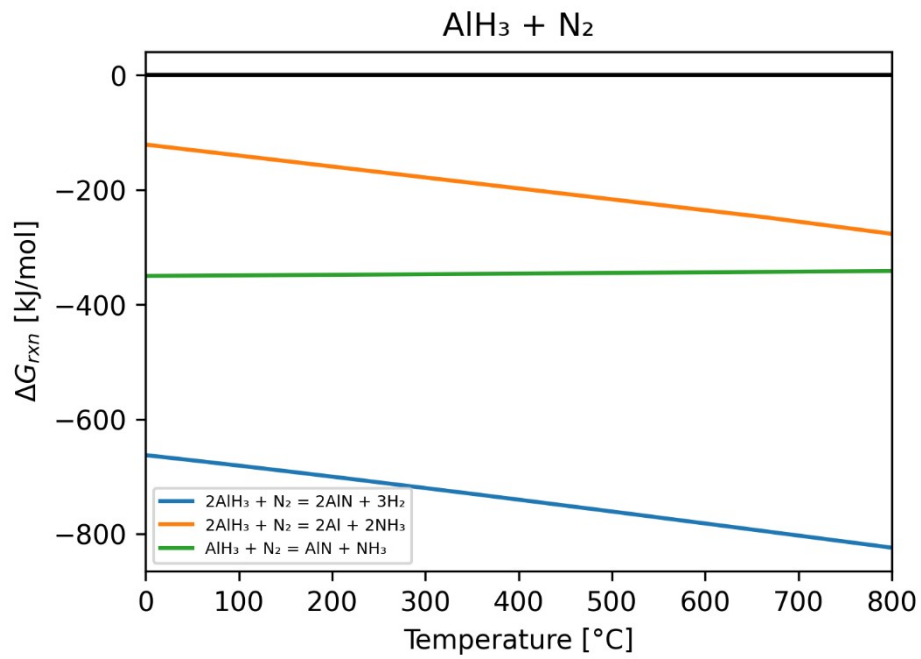

Figure S3: Ellingham diagram of the AlH<sub>3</sub> nitridation step: standard Gibbs free energy change per mol N<sub>2</sub> as a function of temperature.



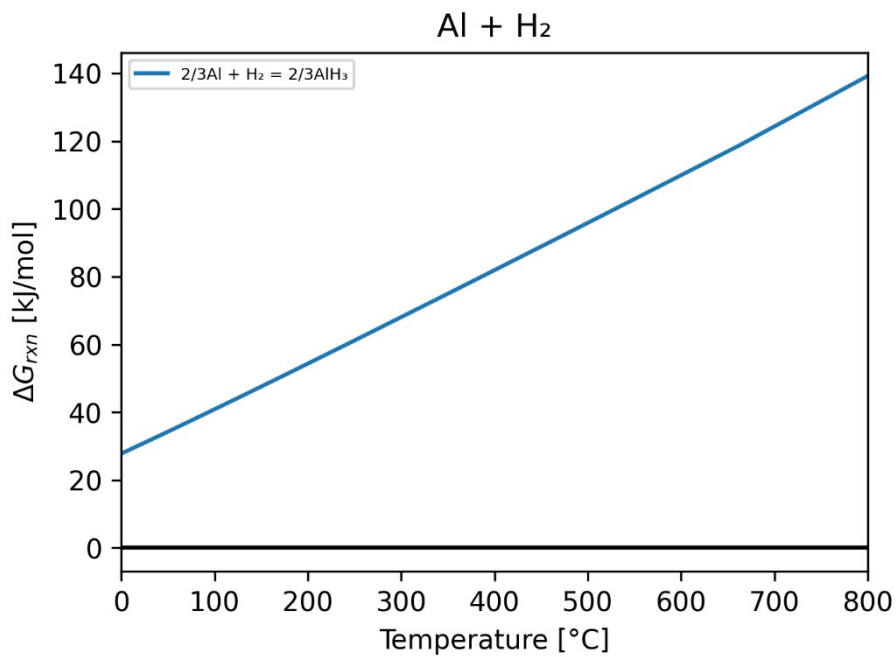

Figure S4: Ellingham diagram of the Al hydrogenation step: standard Gibbs free energy change per mol H<sub>2</sub> as a function of temperature.

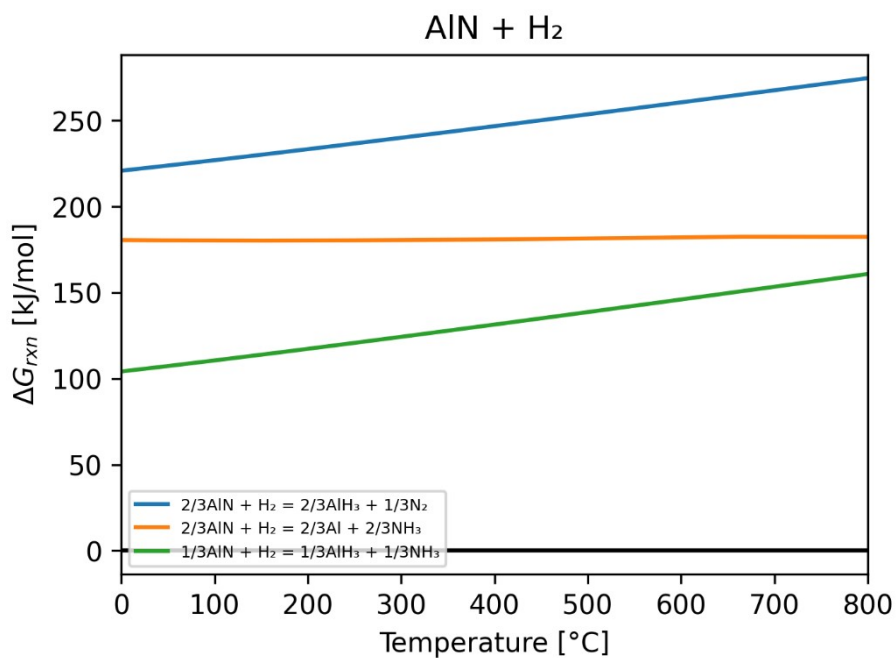

Figure S5: Ellingham diagram of the AlN hydrogenation step: standard Gibbs free energy change per mol H<sub>2</sub> as a function of temperature.

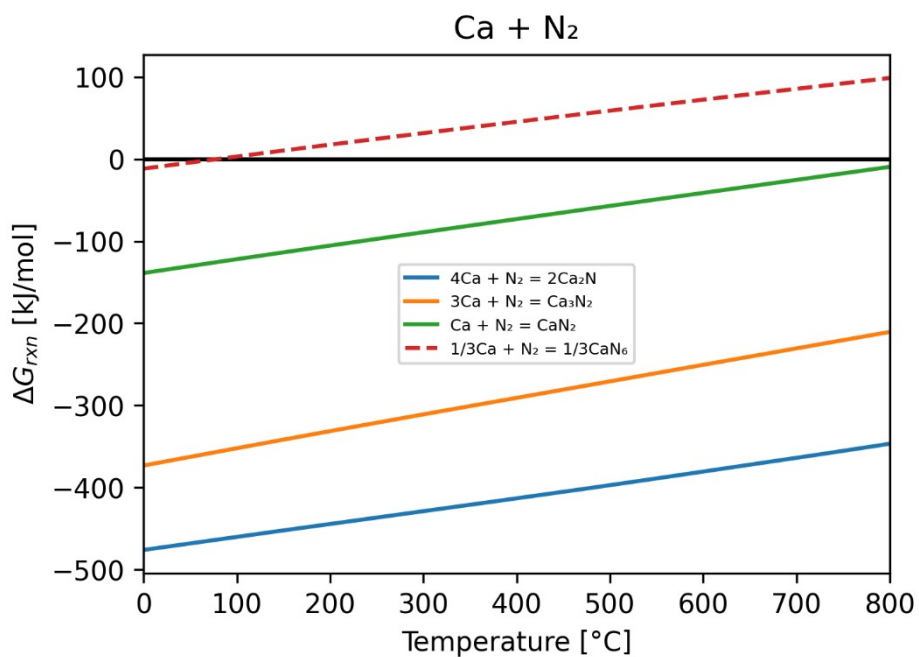

Figure S6: Ellingham diagram of the Ca nitridation step: standard Gibbs free energy change per mol N<sub>2</sub> as a function of temperature.

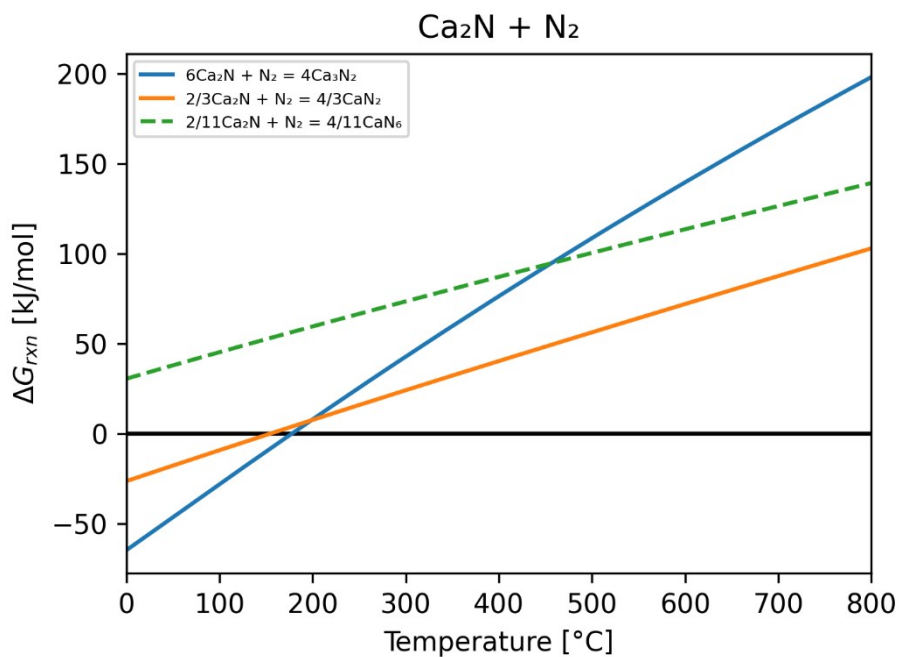

Figure S7: Ellingham diagram of the Ca<sub>2</sub>N nitridation step: standard Gibbs free energy change per mol N<sub>2</sub> as a function of temperature.

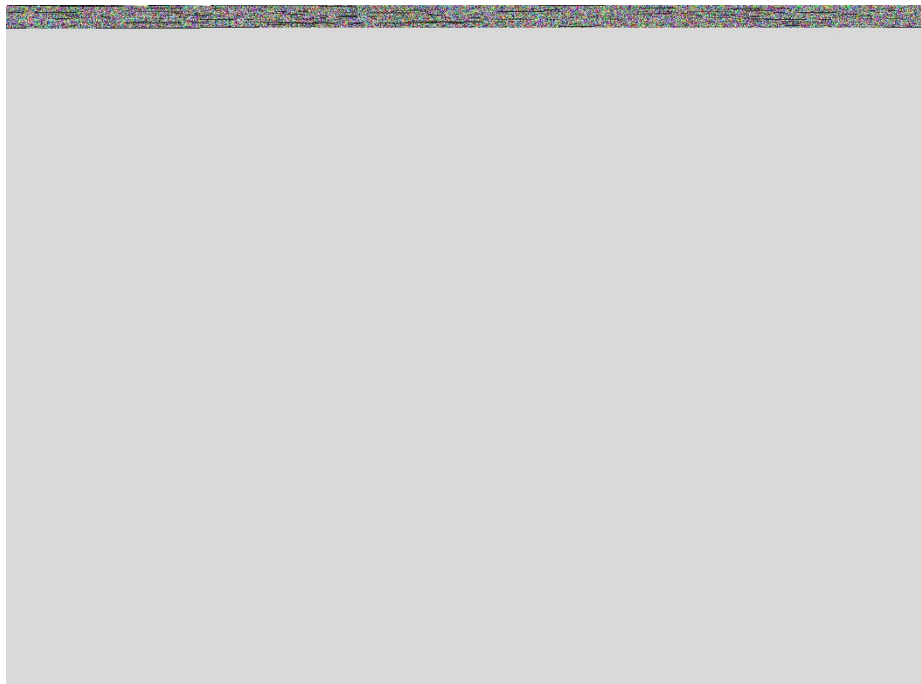

Figure S8: Ellingham diagram of the  $\text{Ca}_2\text{N}$  nitridation step: standard Gibbs free energy change per mol  $\text{N}_2$  as a function of temperature.

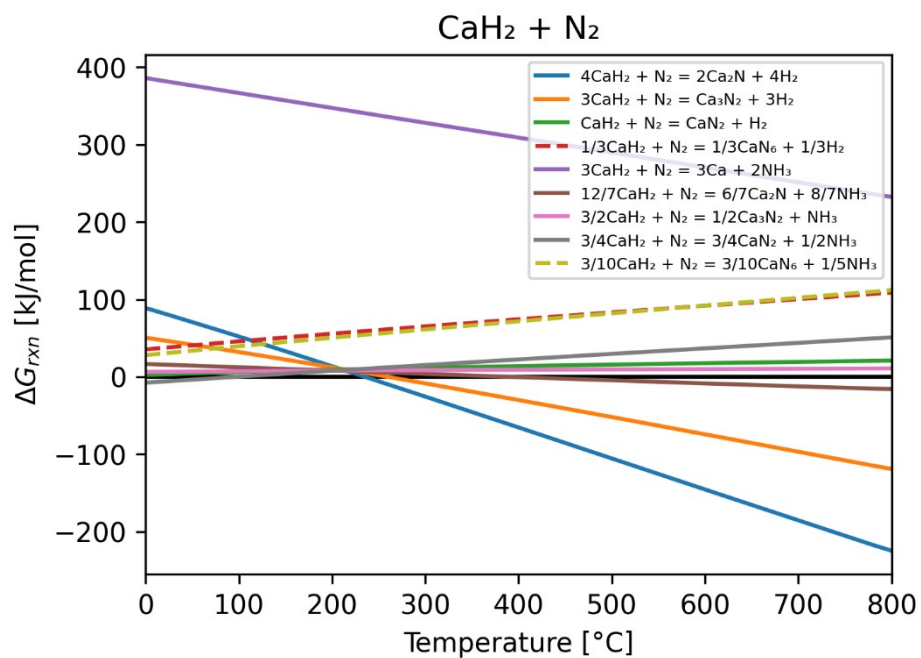

Figure S9: Ellingham diagram of the  $\text{CaH}_2$  nitridation step: standard Gibbs free energy change per mol  $\text{N}_2$  as a function of temperature.

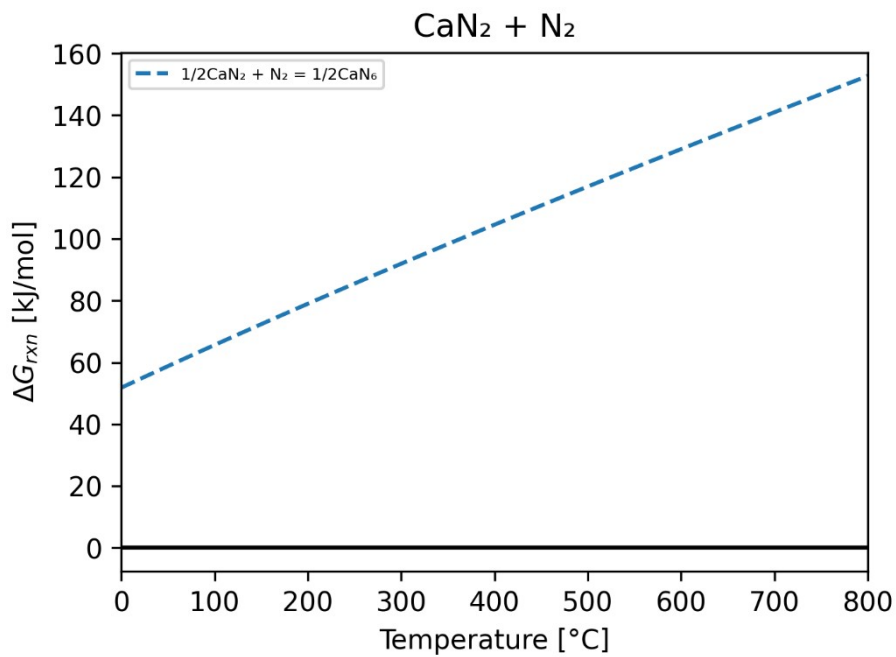

Figure S10: Ellingham diagram of the CaN<sub>2</sub> nitridation step: standard Gibbs free energy change per mol N<sub>2</sub> as a function of temperature.

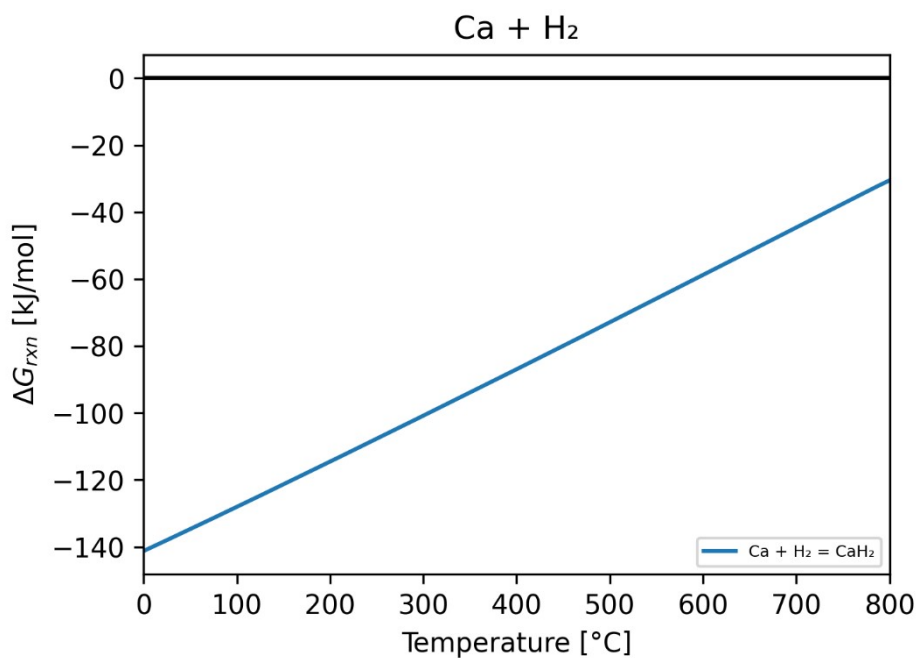

Figure S11: Ellingham diagram of the Ca hydrogenation step: standard Gibbs free energy change per mol H<sub>2</sub> as a function of temperature.

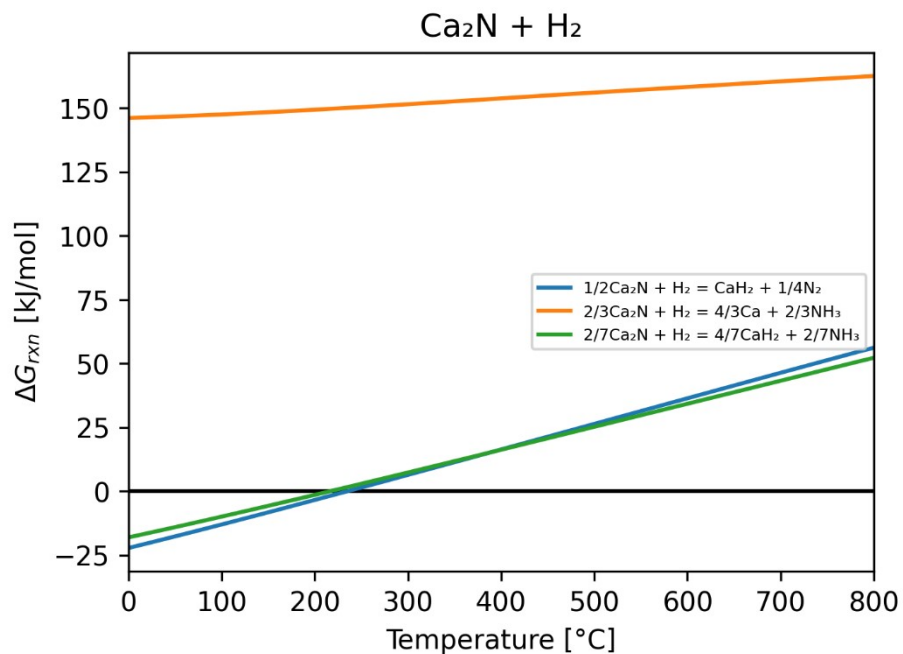

Figure S12: Ellingham diagram of the Ca<sub>2</sub>N hydrogenation step: standard Gibbs free energy change per mol H<sub>2</sub> as a function of temperature.

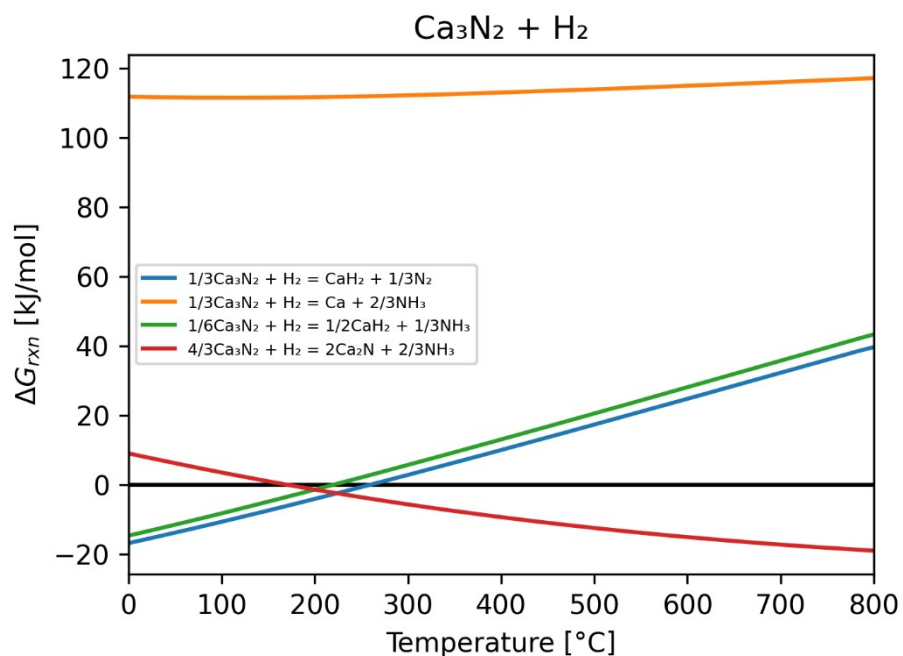

Figure S13: Ellingham diagram of the Ca<sub>3</sub>N<sub>2</sub> hydrogenation step: standard Gibbs free energy change per mol H<sub>2</sub> as a function of temperature.

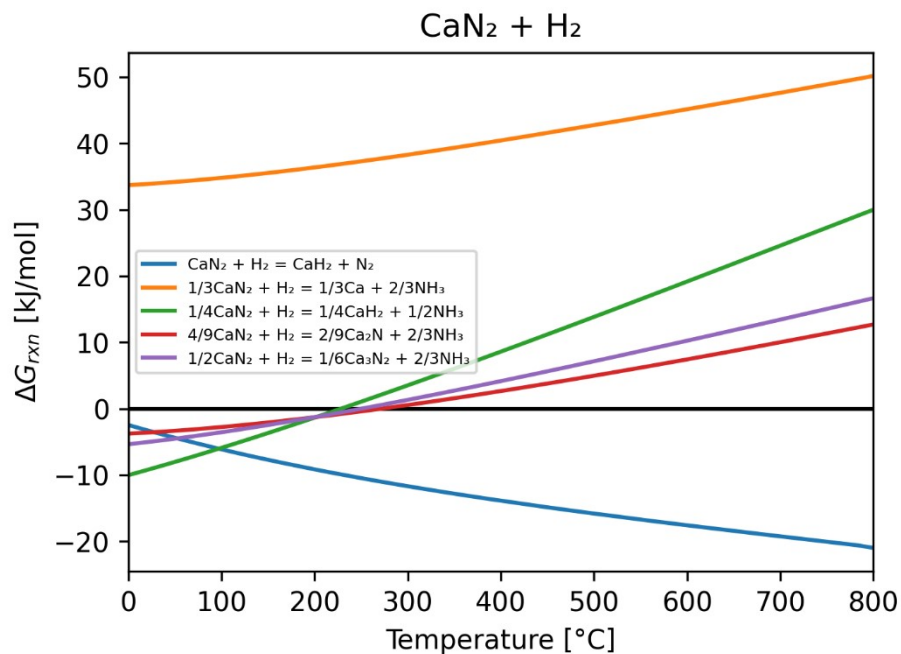

Figure S14: Ellingham diagram of the CaN<sub>2</sub> hydrogenation step: standard Gibbs free energy change per mol H<sub>2</sub> as a function of temperature.

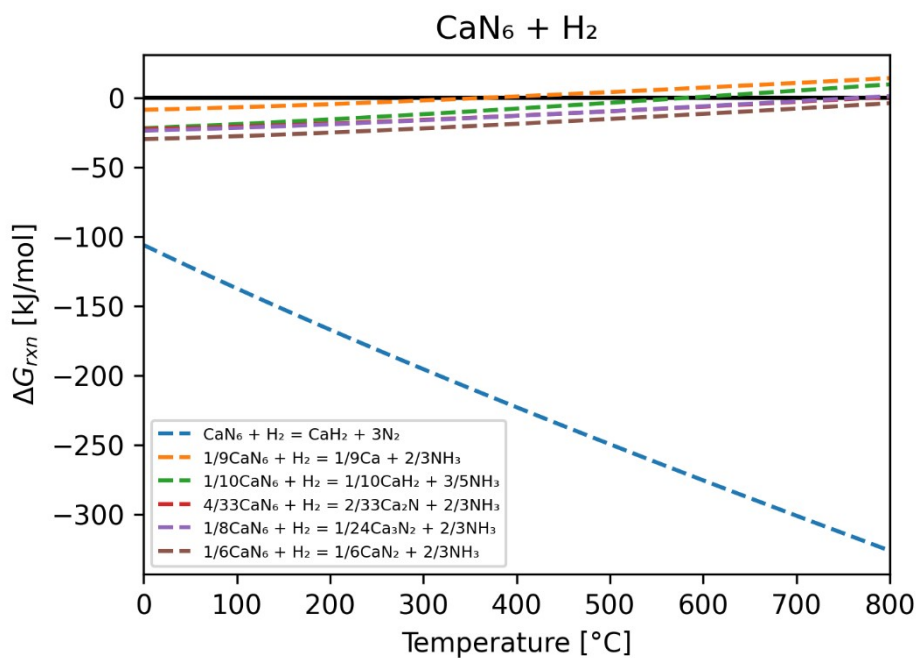

Figure S15: Ellingham diagram of the CaN<sub>6</sub> hydrogenation step: standard Gibbs free energy change per mol H<sub>2</sub> as a function of temperature.

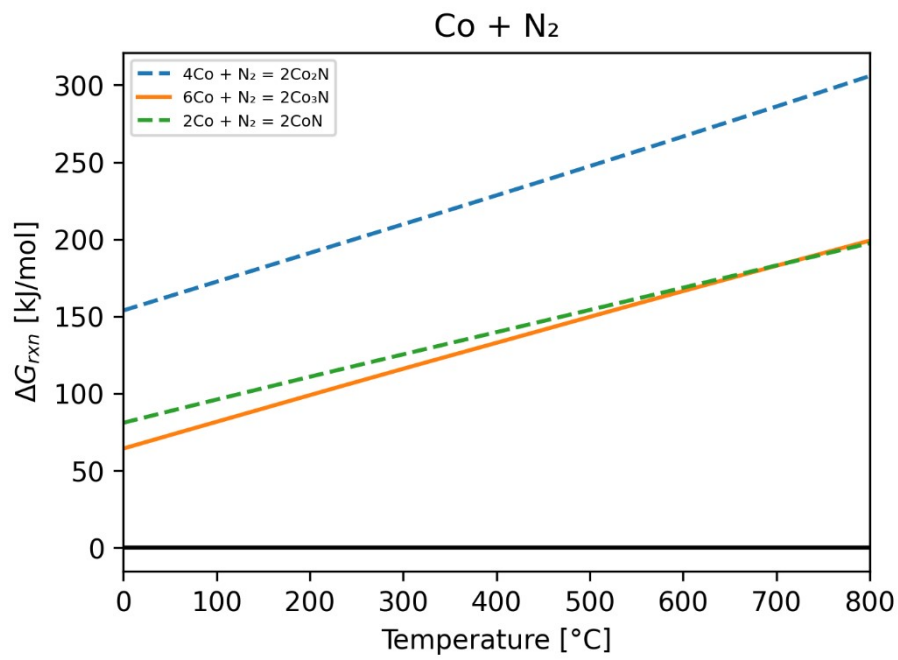

Figure S16: Ellingham diagram of the Co nitridation step: standard Gibbs free energy change per mol N<sub>2</sub> as a function of temperature.

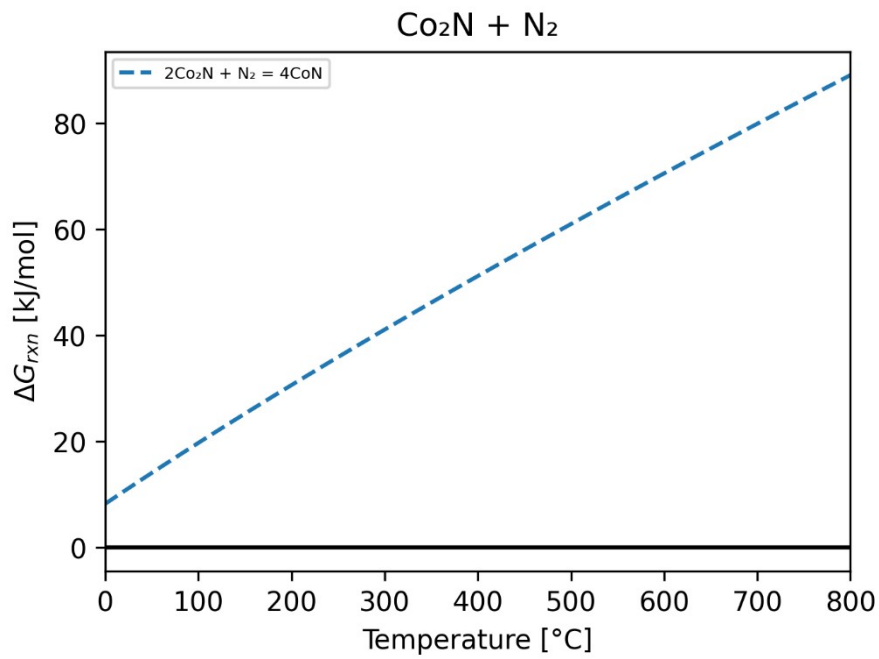

Figure S17: Ellingham diagram of the Co<sub>2</sub>N nitridation step: standard Gibbs free energy change per mol N<sub>2</sub> as a function of temperature.

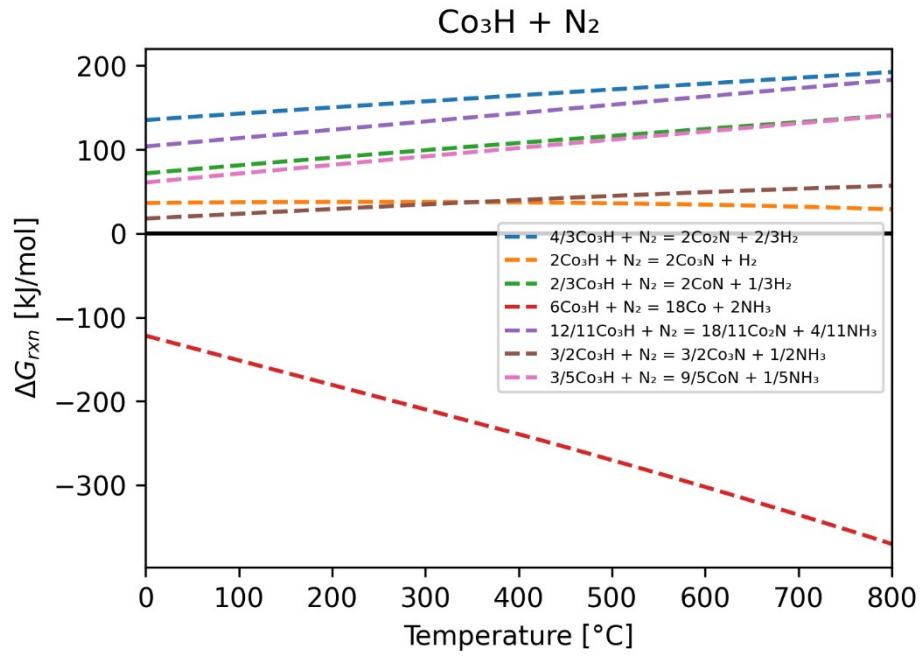

Figure S18: Ellingham diagram of the Co<sub>3</sub>H nitridation step: standard Gibbs free energy change per mol N<sub>2</sub> as a function of temperature.

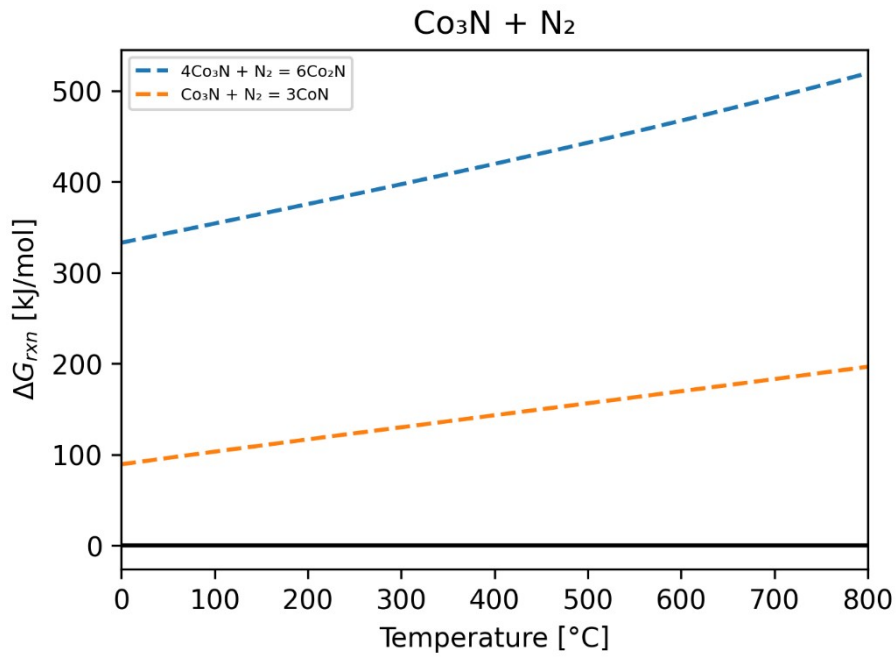

Figure S19: Ellingham diagram of the Co<sub>3</sub>N nitridation step: standard Gibbs free energy change per mol N<sub>2</sub> as a function of temperature.



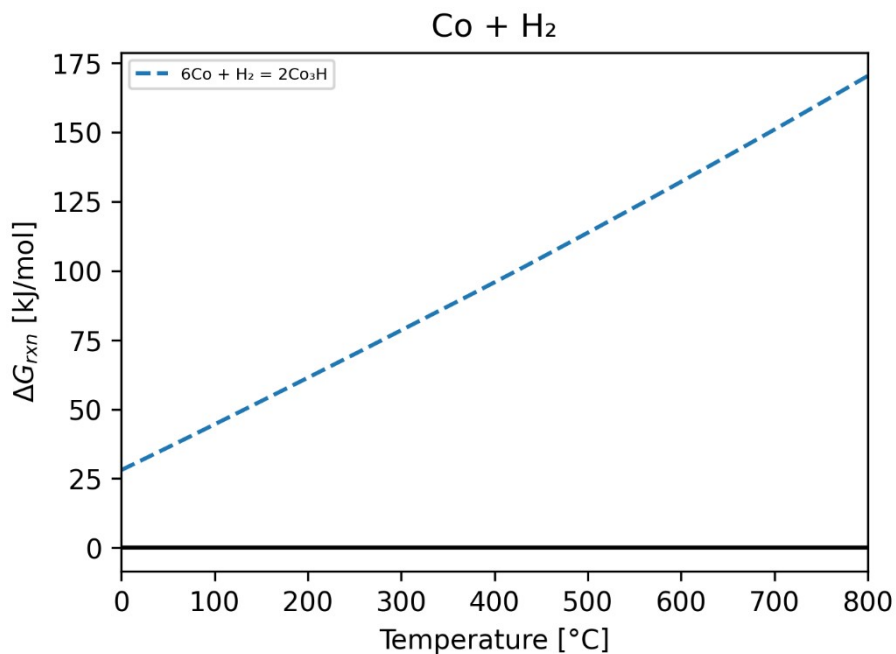

Figure S20: Ellingham diagram of the Co hydrogenation step: standard Gibbs free energy change per mol H<sub>2</sub> as a function of temperature.

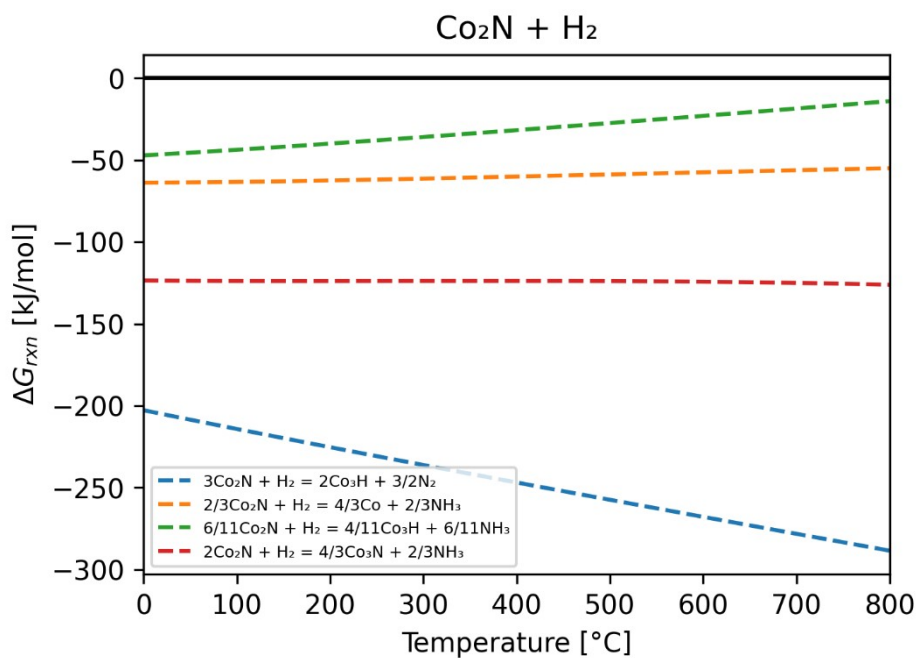

Figure S21: Ellingham diagram of the CO<sub>2</sub>N hydrogenation step: standard Gibbs free energy change per mol H<sub>2</sub> as a function of temperature.

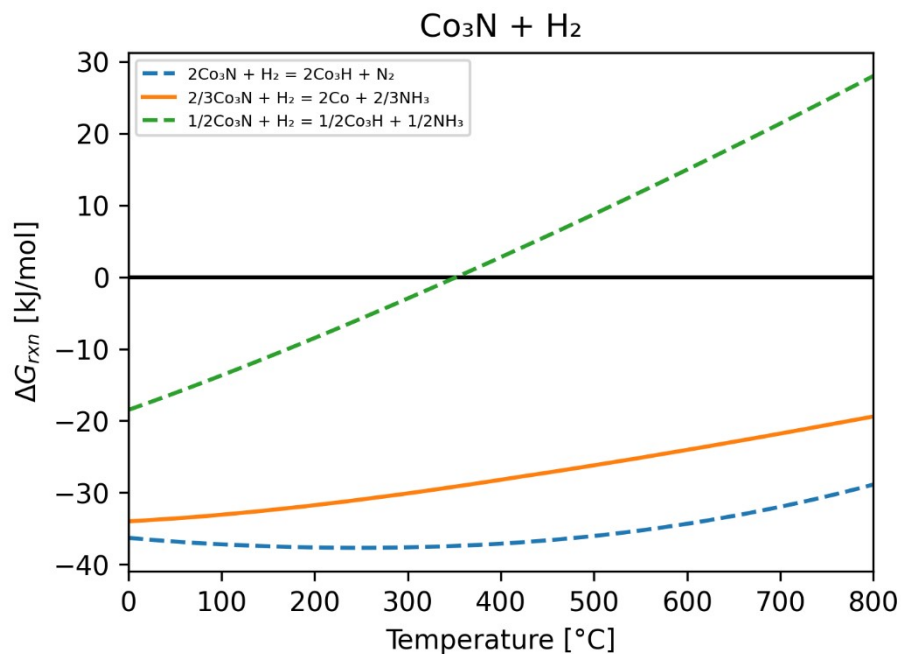

Figure S22: Ellingham diagram of the Co<sub>3</sub>N hydrogenation step: standard Gibbs free energy change per mol H<sub>2</sub> as a function of temperature.

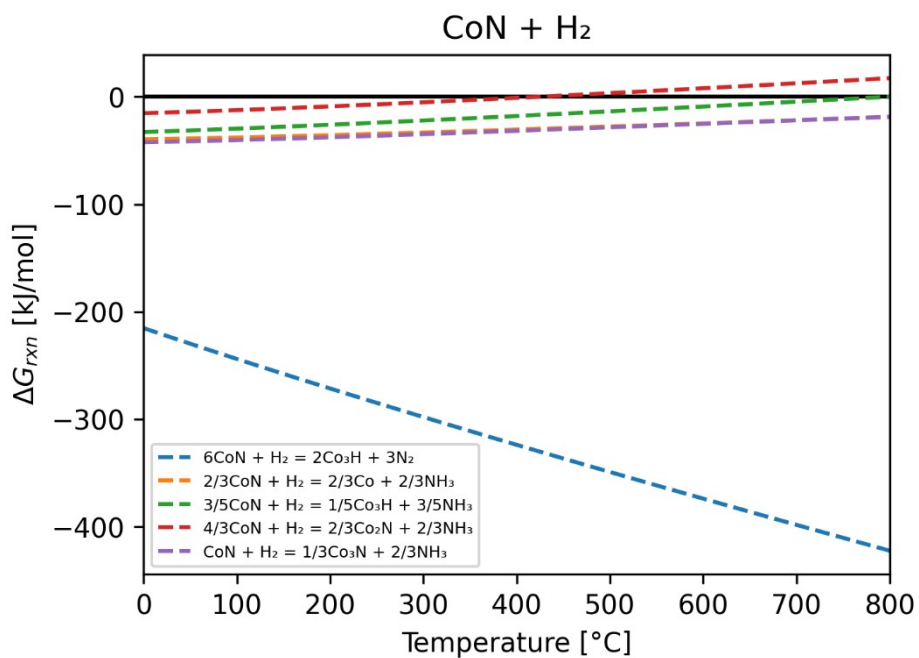

Figure S23: Ellingham diagram of the CoN hydrogenation step: standard Gibbs free energy change per mol H<sub>2</sub> as a function of temperature.

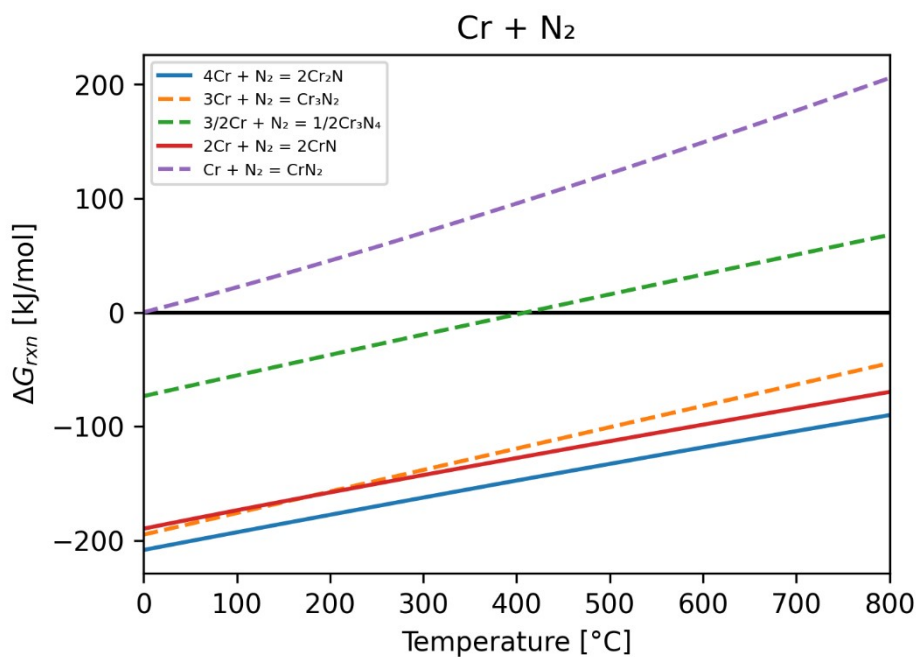

Figure S24: Ellingham diagram of the Cr nitridation step: standard Gibbs free energy change per mol N<sub>2</sub> as a function of temperature.

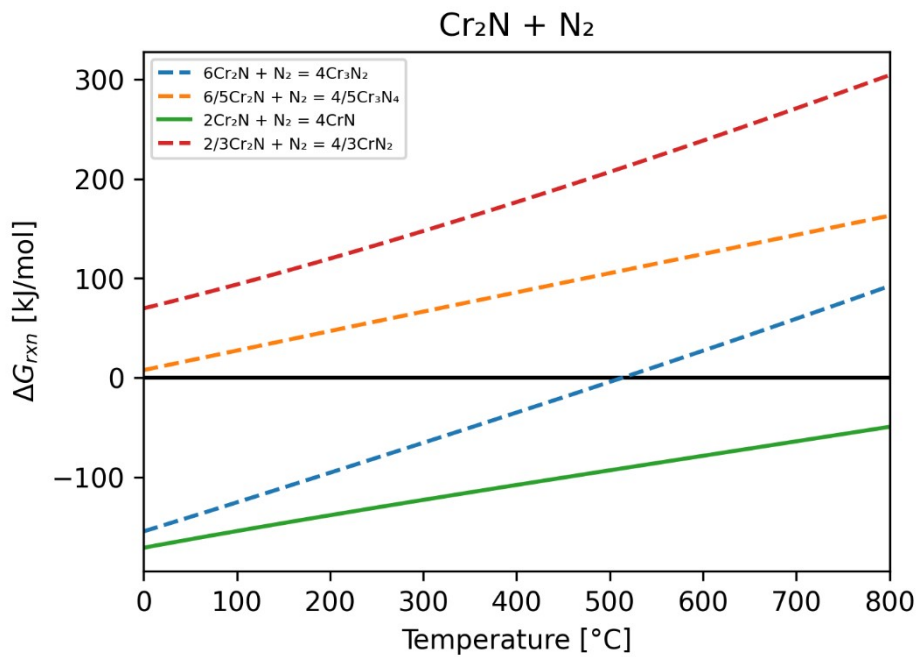

Figure S25: Ellingham diagram of the Cr<sub>2</sub>N nitridation step: standard Gibbs free energy change per mol N<sub>2</sub> as a function of temperature.

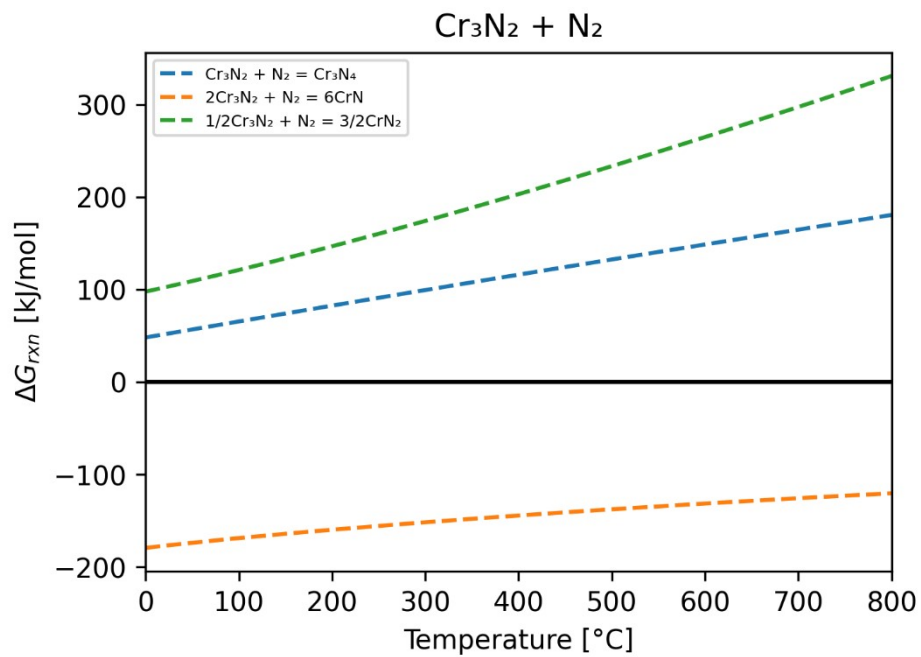

Figure S26: Ellingham diagram of the  $\text{Cr}_3\text{N}_2$  nitridation step: standard Gibbs free energy change per mol  $\text{N}_2$  as a function of temperature.

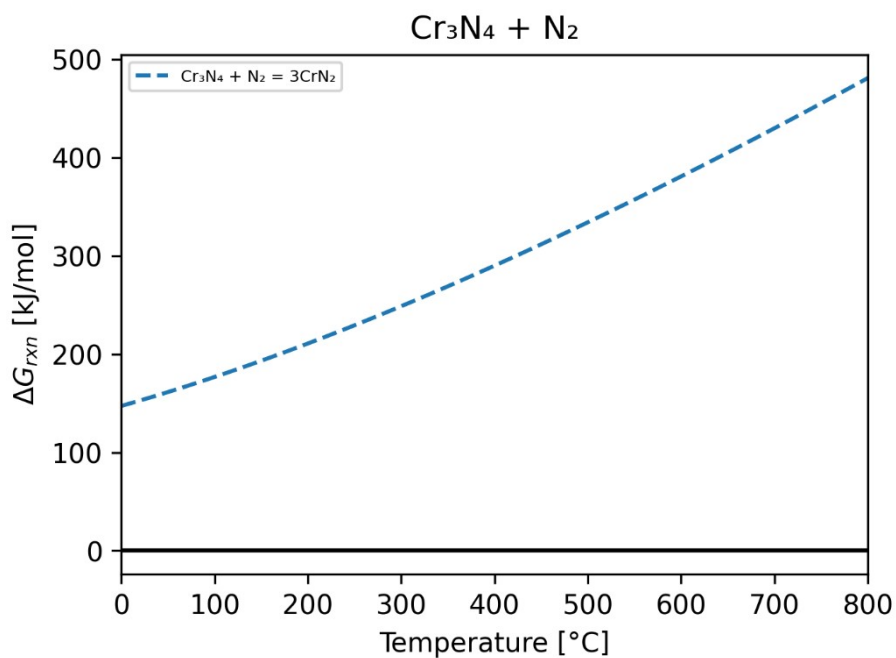

Figure S27: Ellingham diagram of the  $\text{Cr}_3\text{N}_4$  nitridation step: standard Gibbs free energy change per mol  $\text{N}_2$  as a function of temperature.

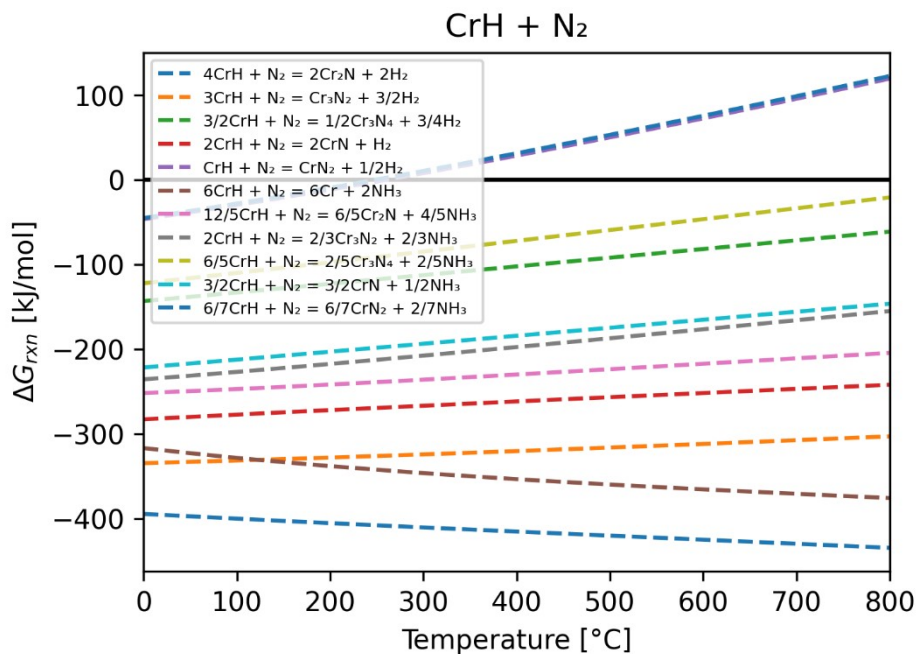

Figure S28: Ellingham diagram of the CrH nitridation step: standard Gibbs free energy change per mol N<sub>2</sub> as a function of temperature.

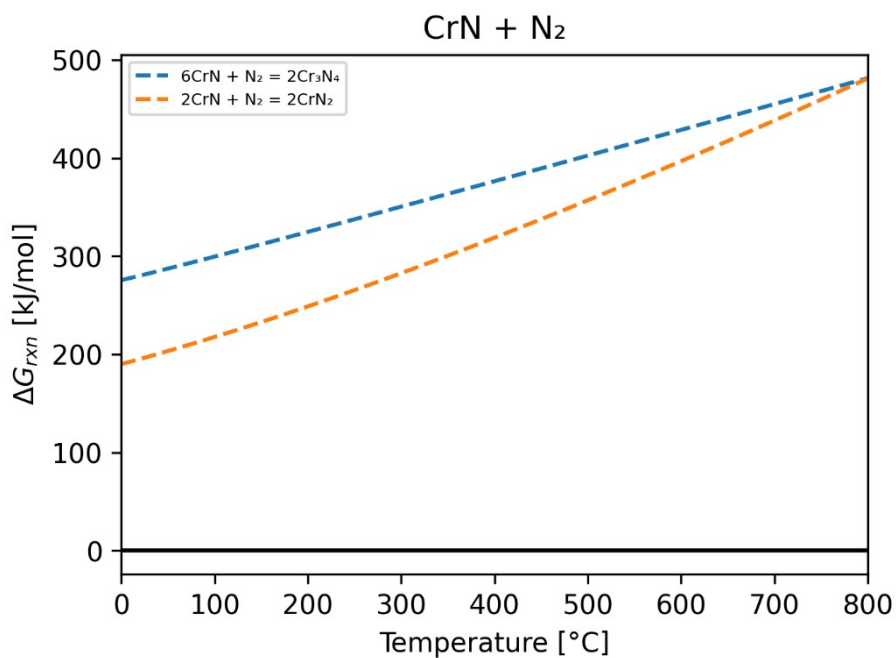

Figure S29: Ellingham diagram of the CrN nitridation step: standard Gibbs free energy change per mol N<sub>2</sub> as a function of temperature.

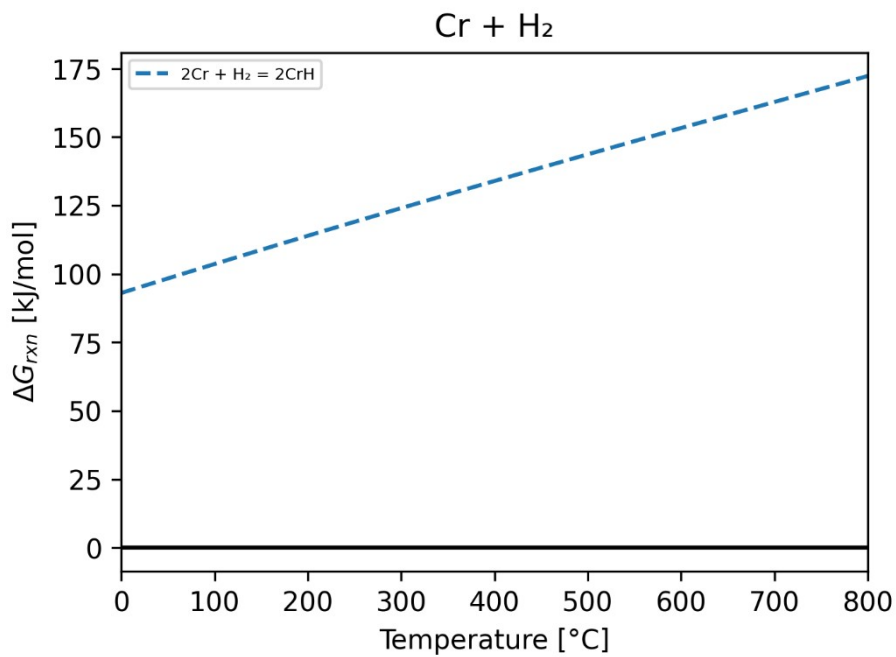

Figure S30: Ellingham diagram of the Cr hydrogenation step: standard Gibbs free energy change per mol H<sub>2</sub> as a function of temperature.

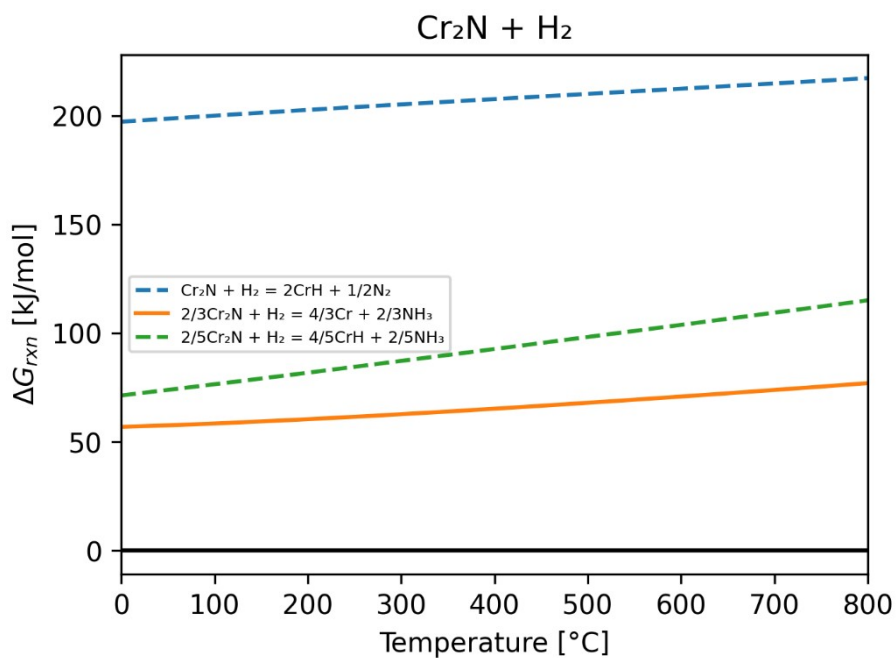

Figure S31: Ellingham diagram of the Cr<sub>2</sub>N hydrogenation step: standard Gibbs free energy change per mol H<sub>2</sub> as a function of temperature.

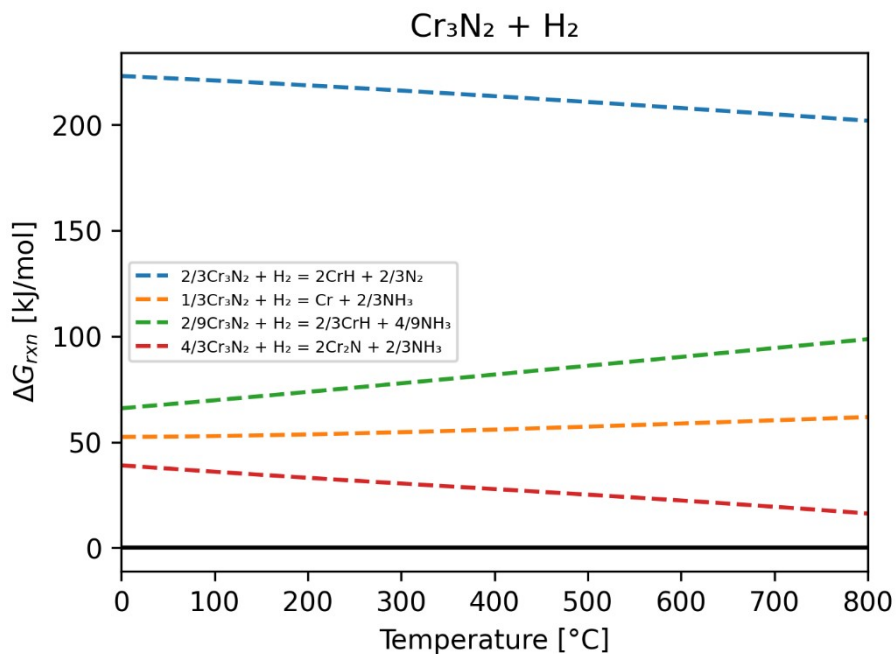

Figure S32: Ellingham diagram of the  $\text{Cr}_3\text{N}_2$  hydrogenation step: standard Gibbs free energy change per mol  $\text{H}_2$  as a function of temperature.

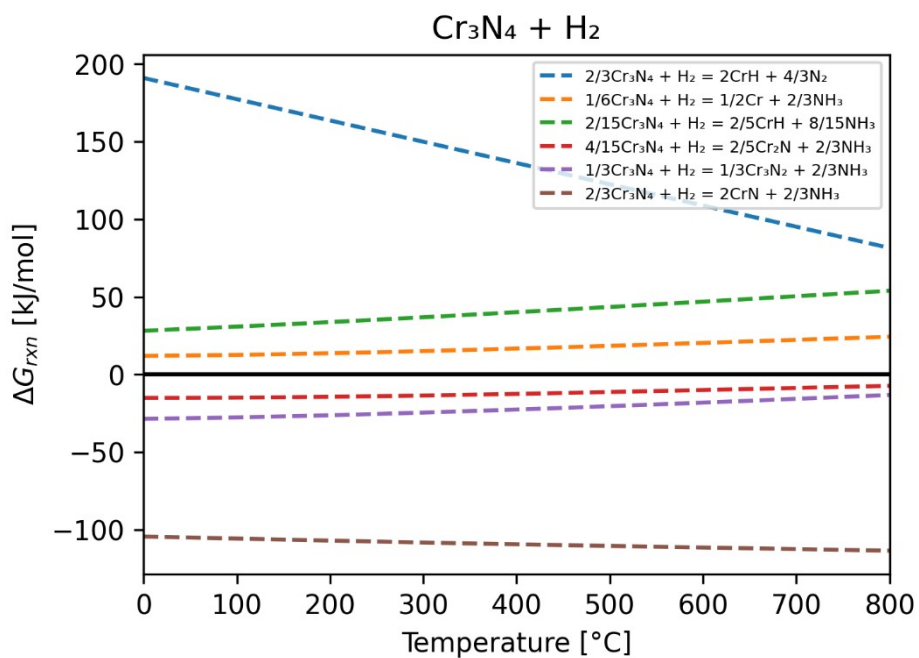

Figure S33: Ellingham diagram of the  $\text{Cr}_3\text{N}_4$  hydrogenation step: standard Gibbs free energy change per mol  $\text{H}_2$  as a function of temperature.

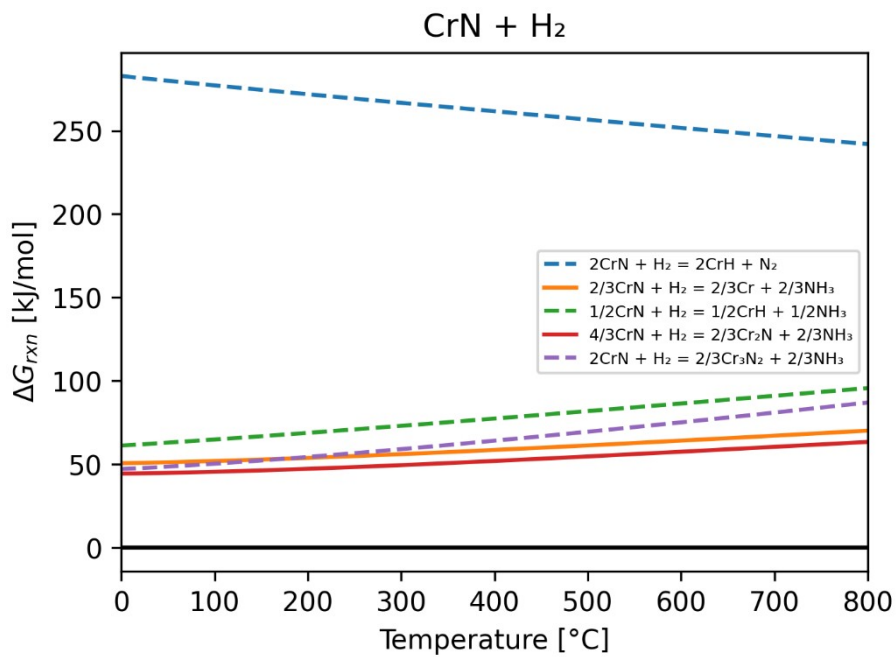

Figure S34: Ellingham diagram of the CrN hydrogenation step: standard Gibbs free energy change per mol H<sub>2</sub> as a function of temperature.

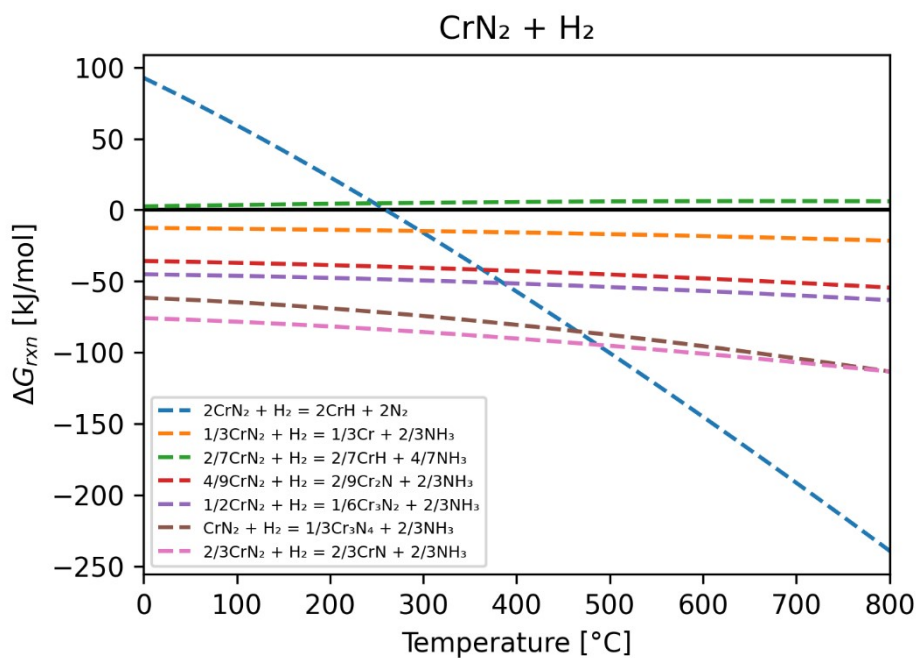

Figure S35: Ellingham diagram of the CrN<sub>2</sub> hydrogenation step: standard Gibbs free energy change per mol H<sub>2</sub> as a function of temperature.



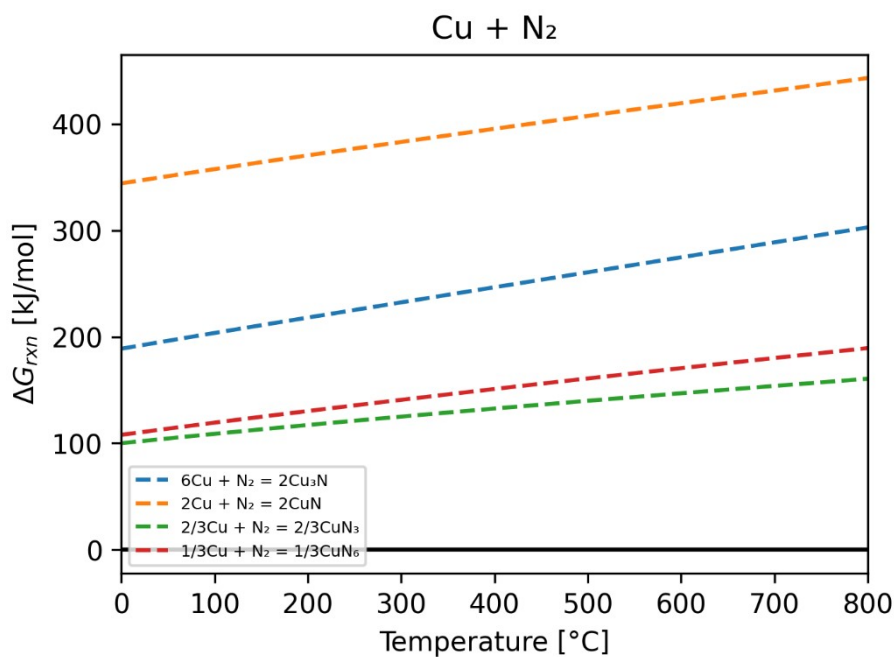

Figure S36: Ellingham diagram of the Cu nitridation step: standard Gibbs free energy change per mol N<sub>2</sub> as a function of temperature.

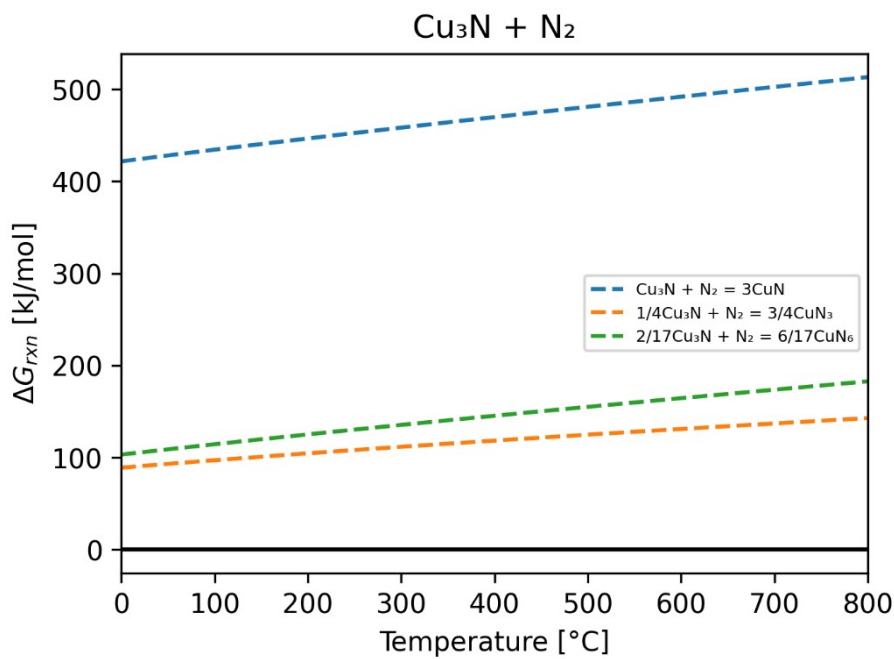

Figure S37: Ellingham diagram of the Cu<sub>3</sub>N nitridation step: standard Gibbs free energy change per mol N<sub>2</sub> as a function of temperature.

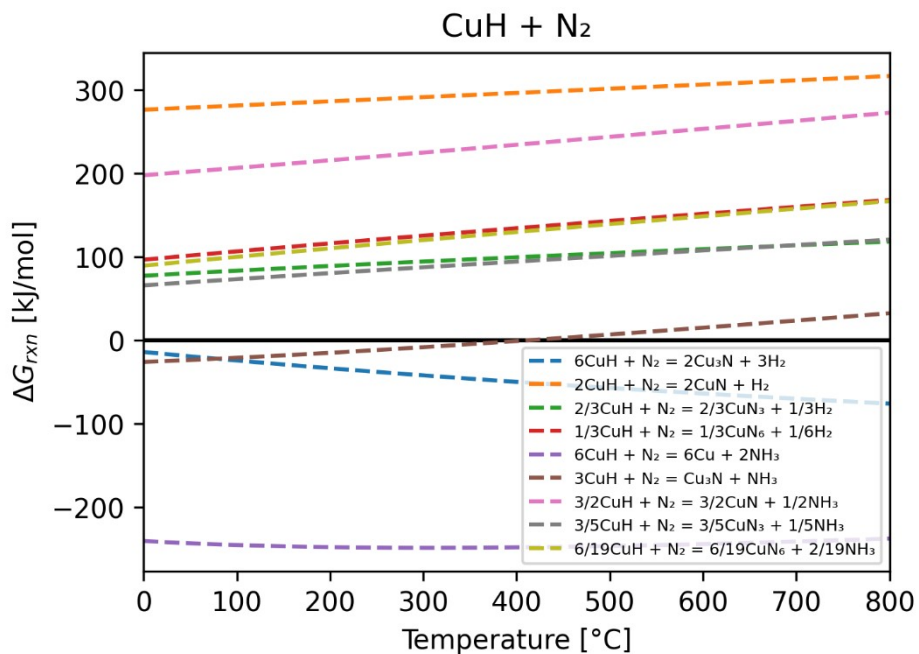

Figure S38: Ellingham diagram of the CuH nitridation step: standard Gibbs free energy change per mol N<sub>2</sub> as a function of temperature.

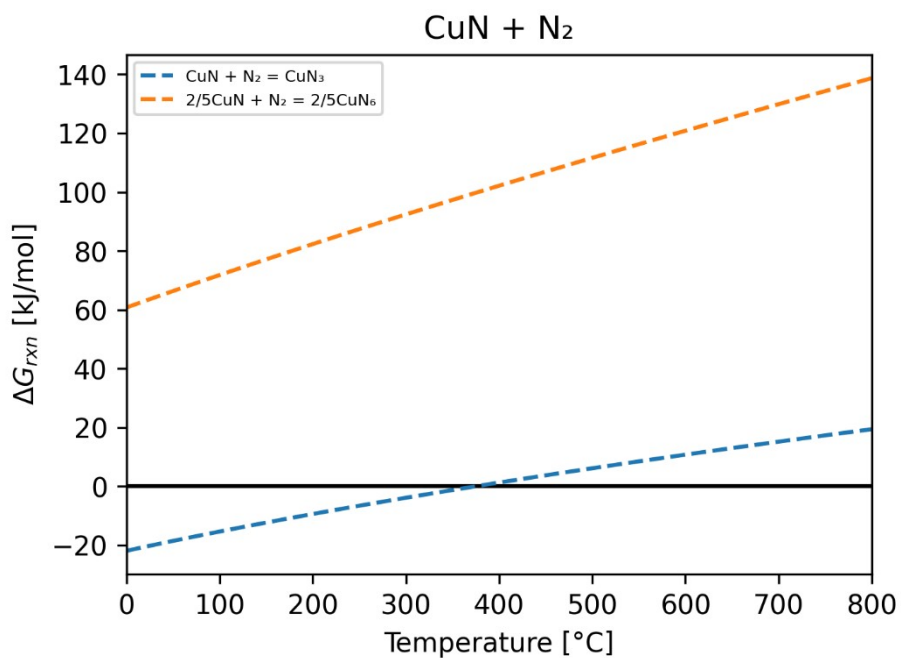

Figure S39: Ellingham diagram of the CuN nitridation step: standard Gibbs free energy change per mol N<sub>2</sub> as a function of temperature.

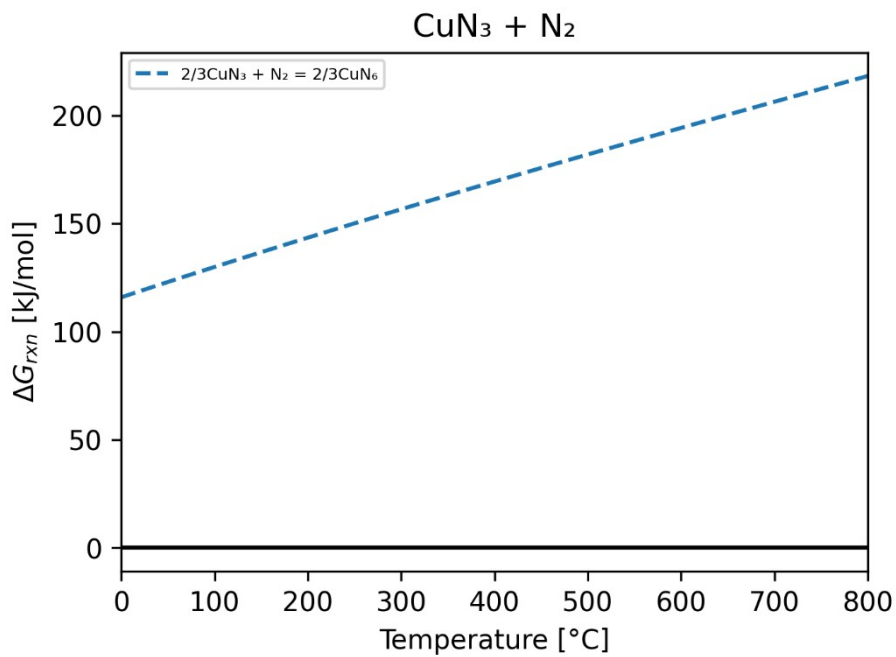

Figure S40: Ellingham diagram of the CuN<sub>3</sub> nitridation step: standard Gibbs free energy change per mol N<sub>2</sub> as a function of temperature.

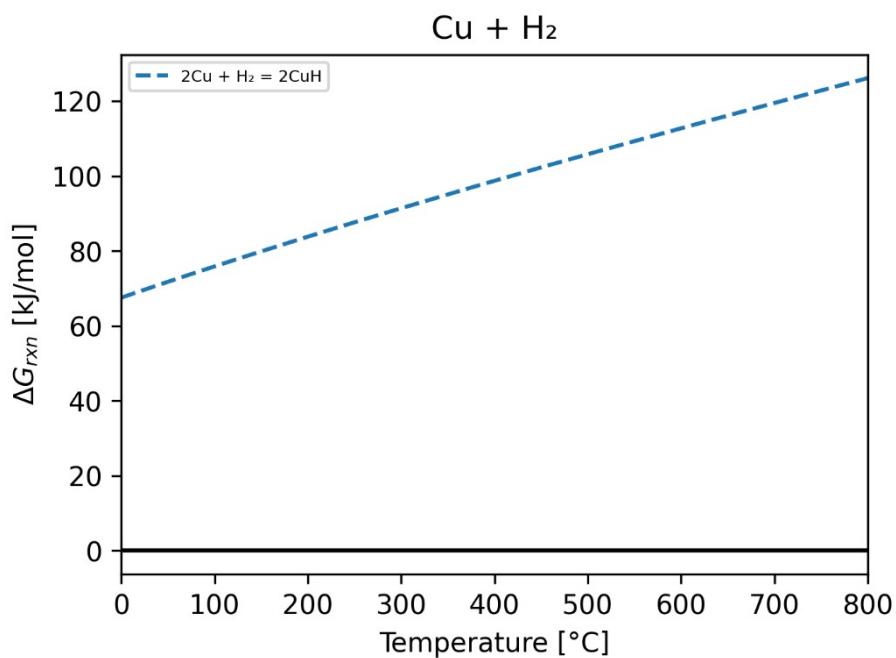

Figure S41: Ellingham diagram of the Cu hydrogenation step: standard Gibbs free energy change per mol H<sub>2</sub> as a function of temperature.

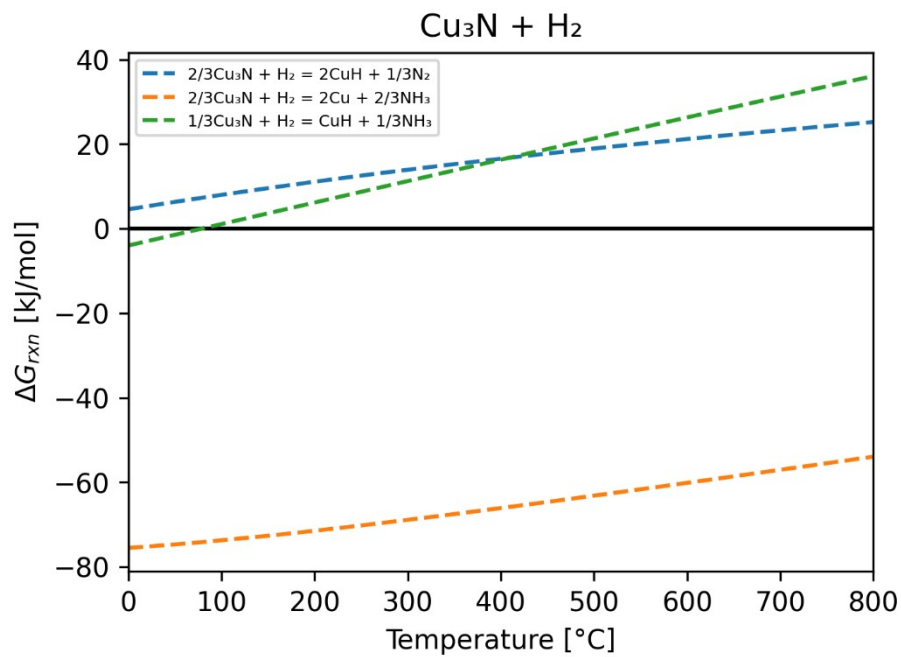

Figure S42: Ellingham diagram of the Cu<sub>3</sub>N hydrogenation step: standard Gibbs free energy change per mol H<sub>2</sub> as a function of temperature.

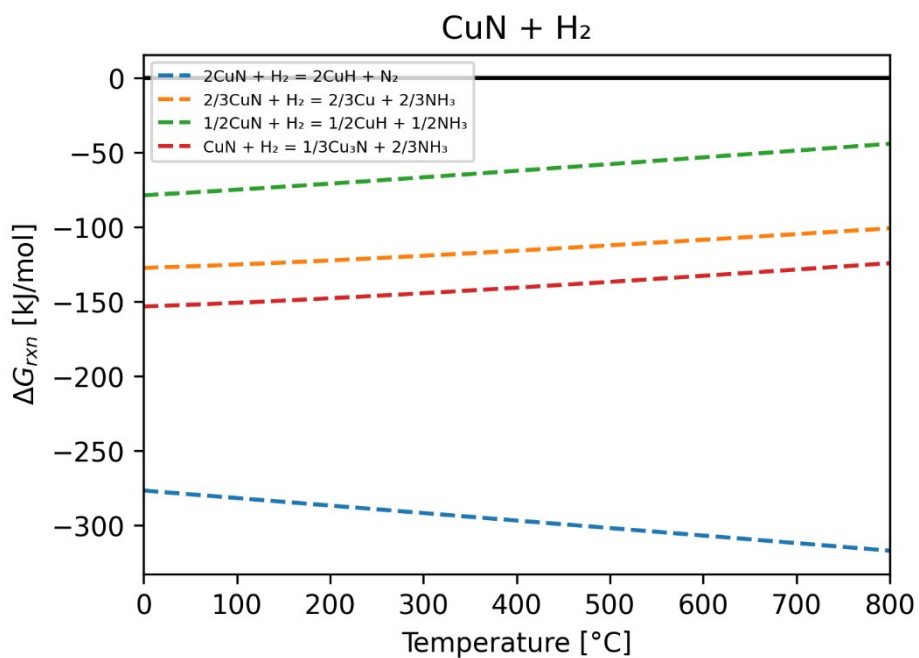

Figure S43: Ellingham diagram of the CuN hydrogenation step: standard Gibbs free energy change per mol H<sub>2</sub> as a function of temperature.

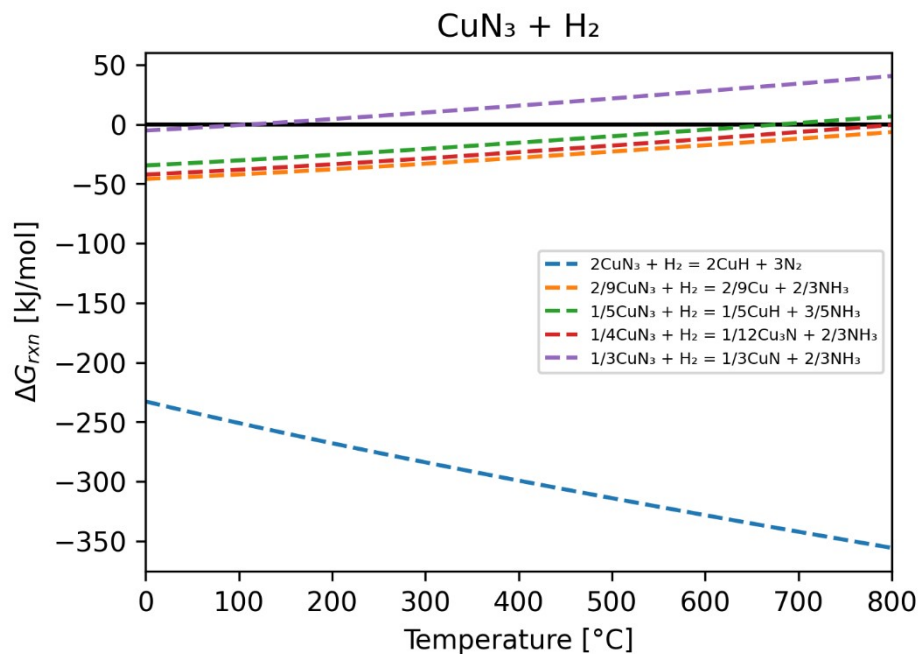

Figure S44: Ellingham diagram of the CuN<sub>3</sub> hydrogenation step: standard Gibbs free energy change per mol H<sub>2</sub> as a function of temperature.

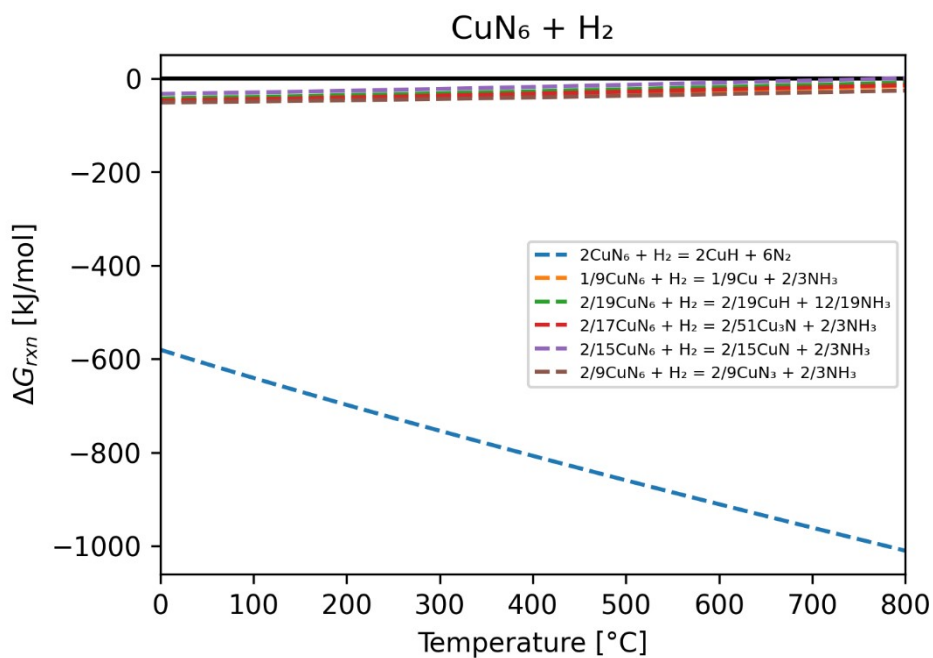

Figure S45: Ellingham diagram of the CuN<sub>6</sub> hydrogenation step: standard Gibbs free energy change per mol H<sub>2</sub> as a function of temperature.

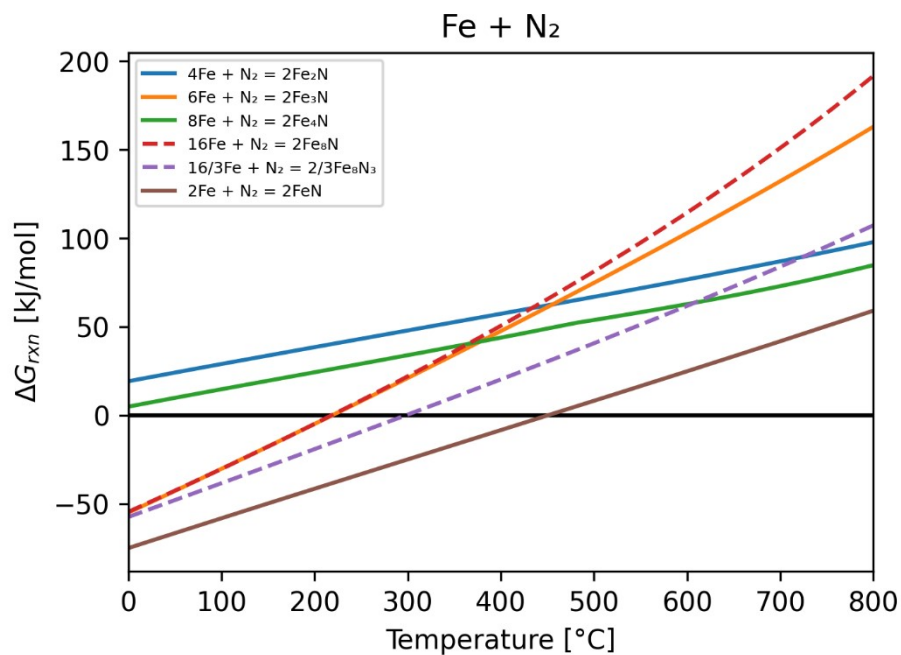

Figure S46: Ellingham diagram of the Fe nitridation step: standard Gibbs free energy change per mol N<sub>2</sub> as a function of temperature.

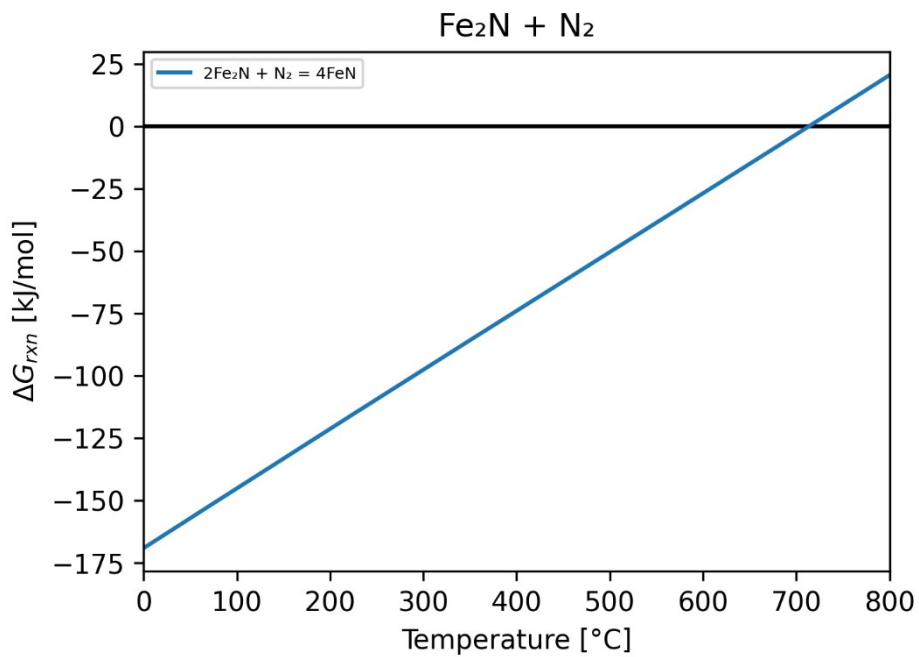

Figure S47: Ellingham diagram of the Fe<sub>2</sub>N nitridation step: standard Gibbs free energy change per mol N<sub>2</sub> as a function of temperature.

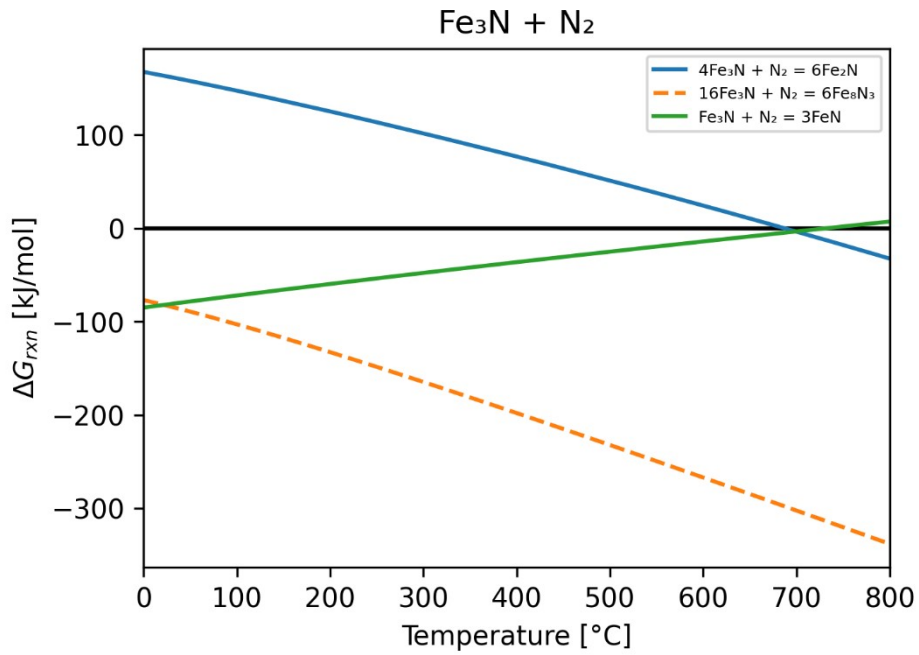

Figure S48: Ellingham diagram of the Fe<sub>3</sub>N nitridation step: standard Gibbs free energy change per mol N<sub>2</sub> as a function of temperature.

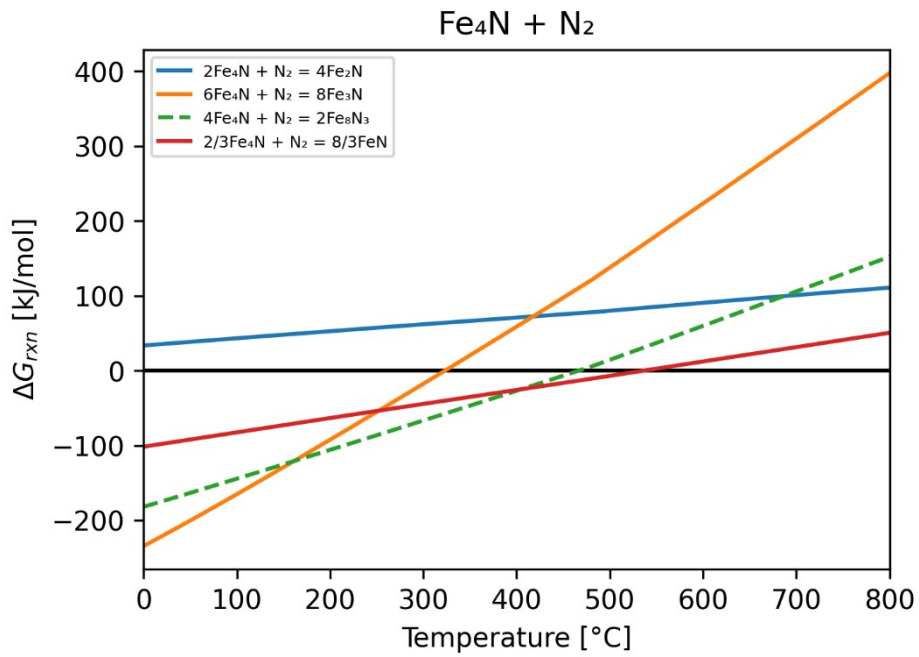

Figure S49: Ellingham diagram of the Fe<sub>4</sub>N nitridation step: standard Gibbs free energy change per mol N<sub>2</sub> as a function of temperature.

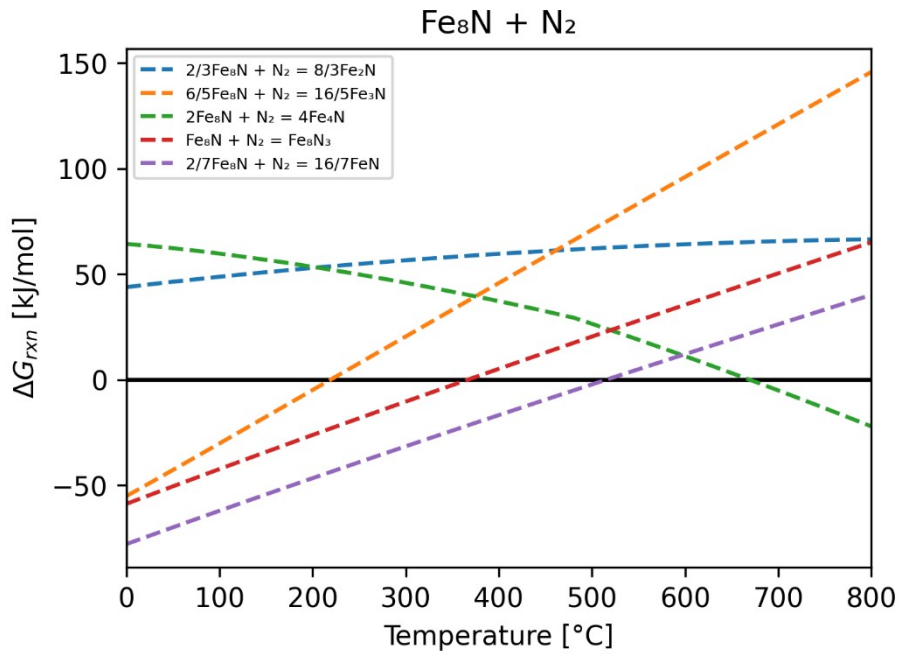

Figure S50: Ellingham diagram of the Fe<sub>8</sub>N nitridation step: standard Gibbs free energy change per mol N<sub>2</sub> as a function of temperature.

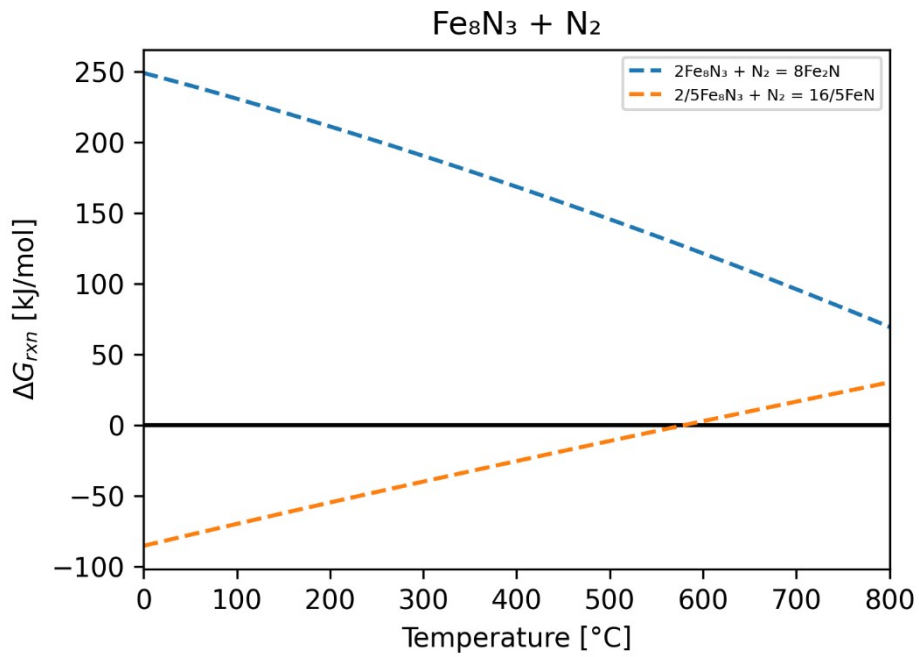

Figure S51: Ellingham diagram of the Fe<sub>8</sub>N<sub>3</sub> nitridation step: standard Gibbs free energy change per mol N<sub>2</sub> as a function of temperature.



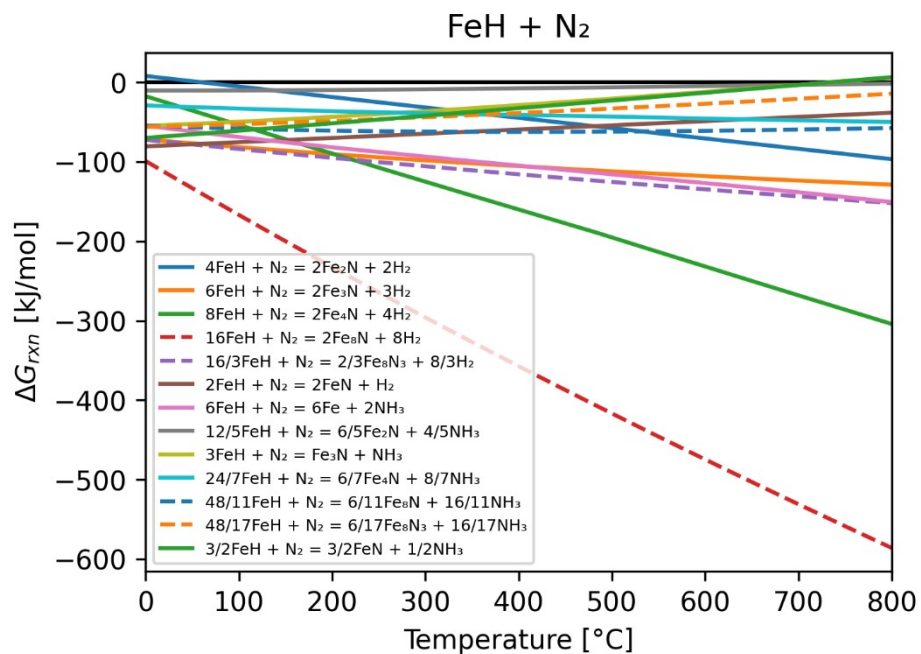

Figure S52: Ellingham diagram of the FeH nitridation step: standard Gibbs free energy change per mol N<sub>2</sub> as a function of temperature.

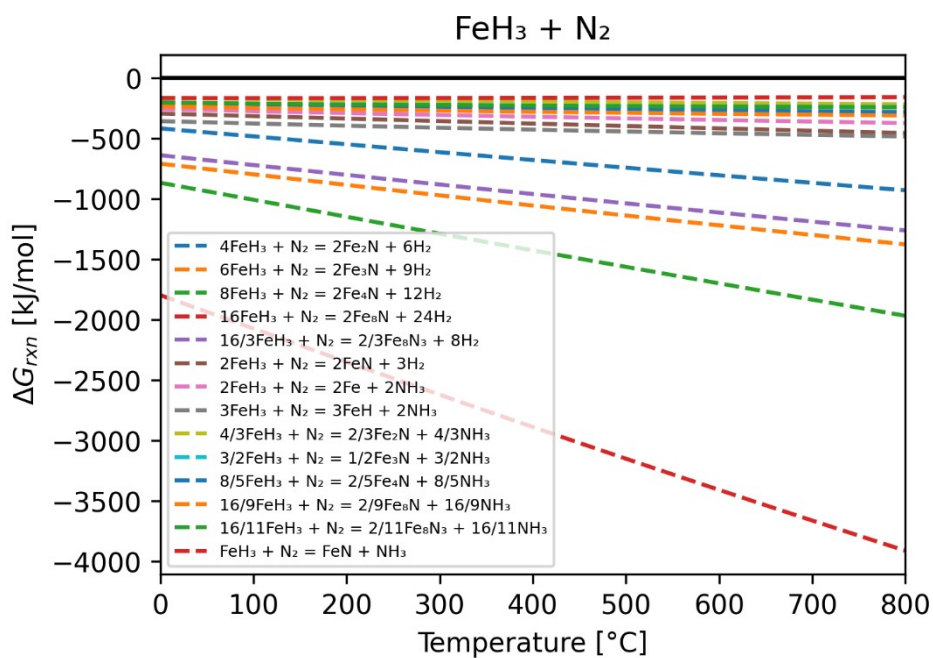

Figure S53: Ellingham diagram of the FeH<sub>3</sub> nitridation step: standard Gibbs free energy change per mol N<sub>2</sub> as a function of temperature.

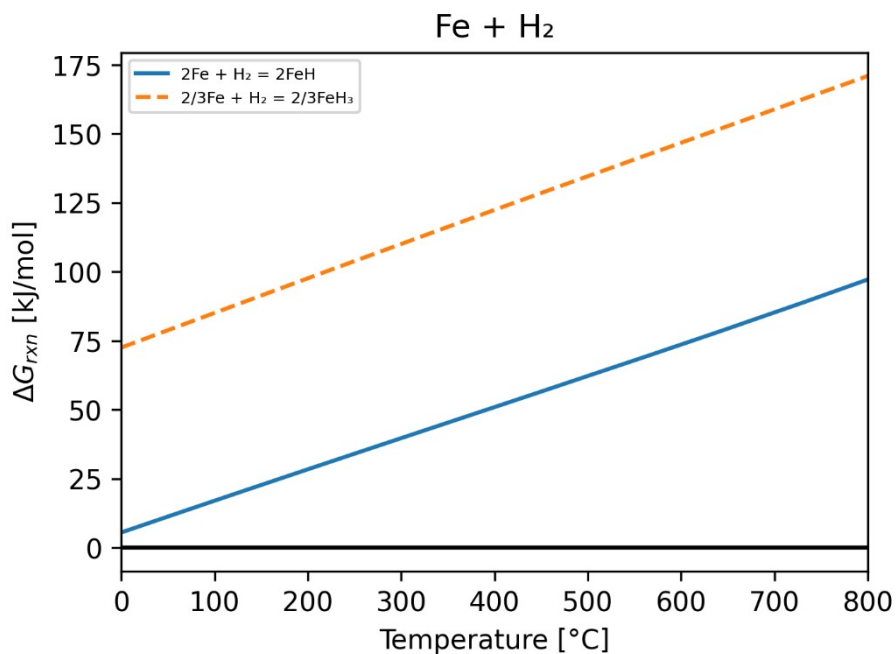

Figure S54: Ellingham diagram of the Fe hydrogenation step: standard Gibbs free energy change per mol H<sub>2</sub> as a function of temperature.

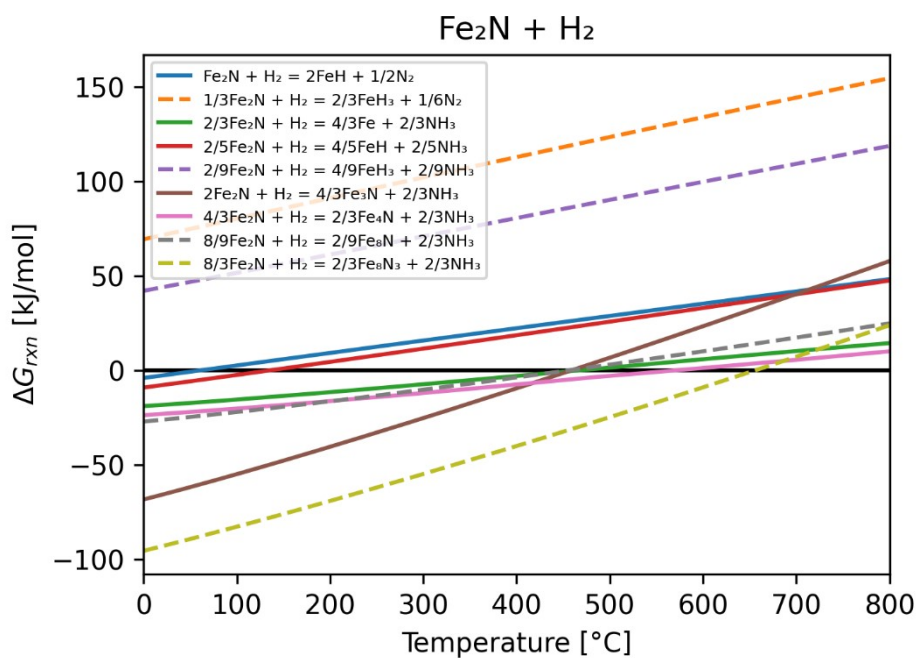

Figure S55: Ellingham diagram of the Fe<sub>2</sub>N hydrogenation step: standard Gibbs free energy change per mol H<sub>2</sub> as a function of temperature.

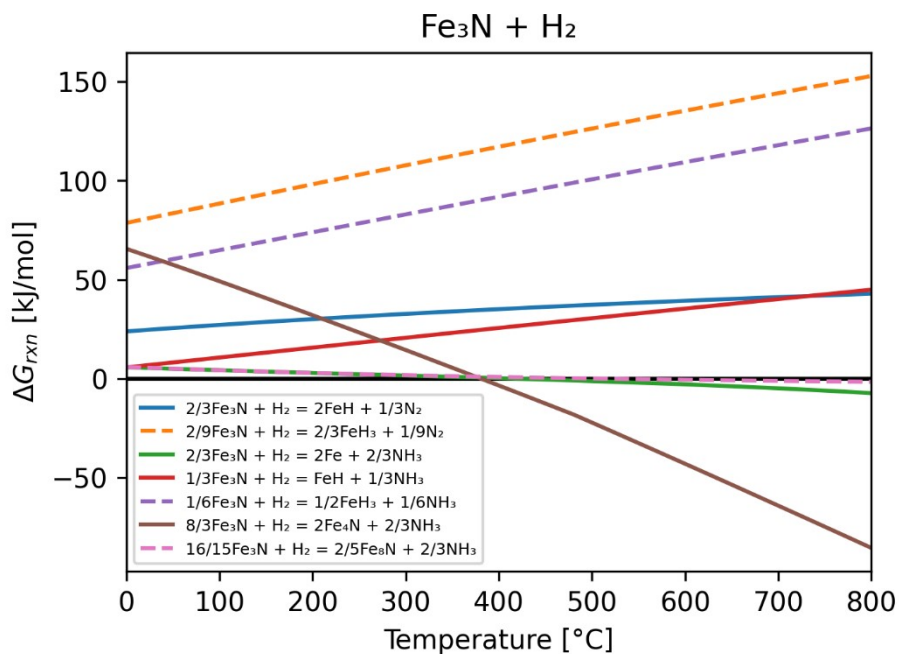

Figure S56: Ellingham diagram of the Fe<sub>3</sub>N hydrogenation step: standard Gibbs free energy change per mol H<sub>2</sub> as a function of temperature.

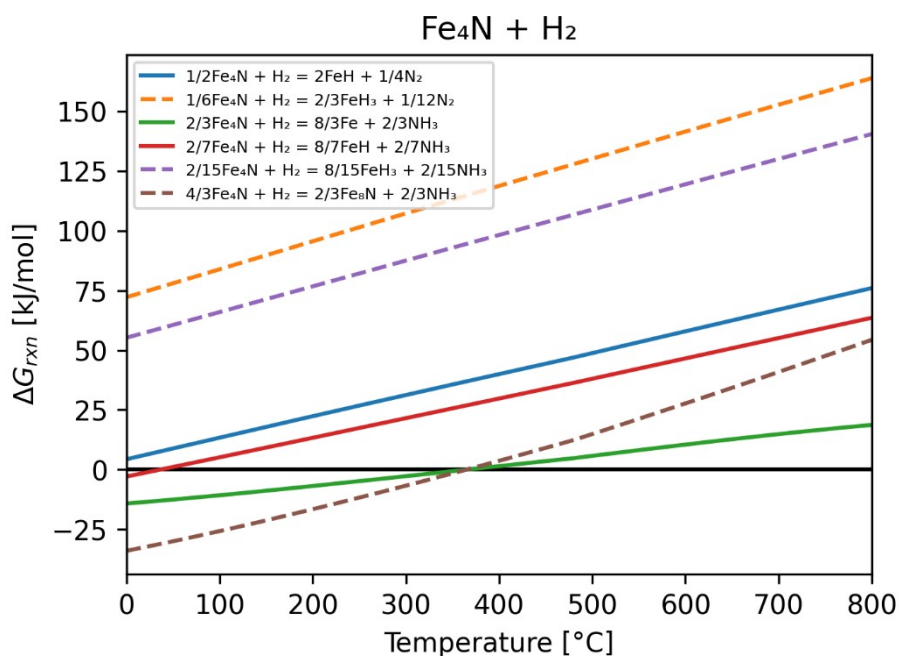

Figure S57: Ellingham diagram of the Fe<sub>4</sub>N hydrogenation step: standard Gibbs free energy change per mol H<sub>2</sub> as a function of temperature.

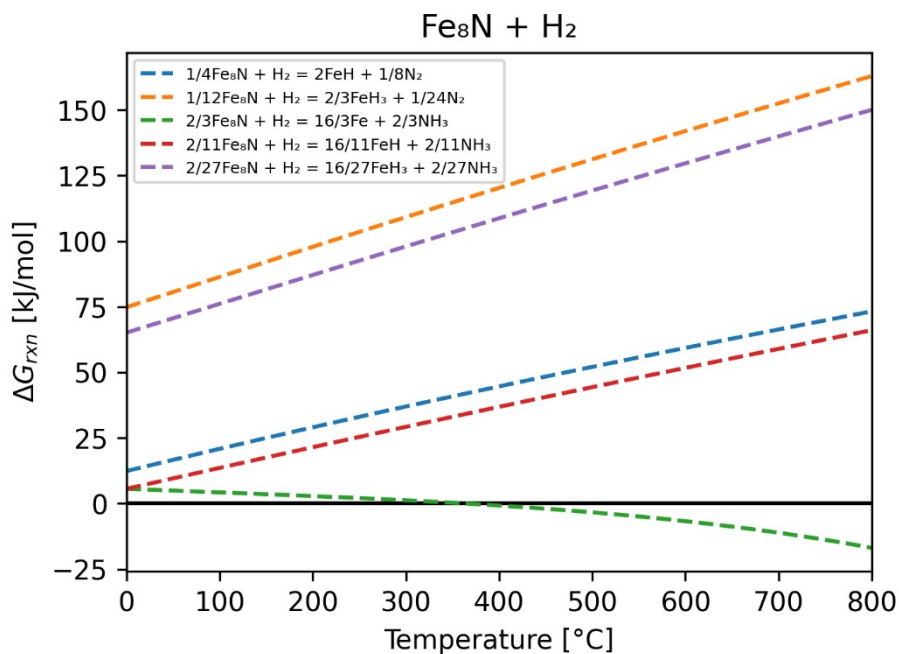

Figure S58: Ellingham diagram of the Fe<sub>8</sub>N hydrogenation step: standard Gibbs free energy change per mol H<sub>2</sub> as a function of temperature.

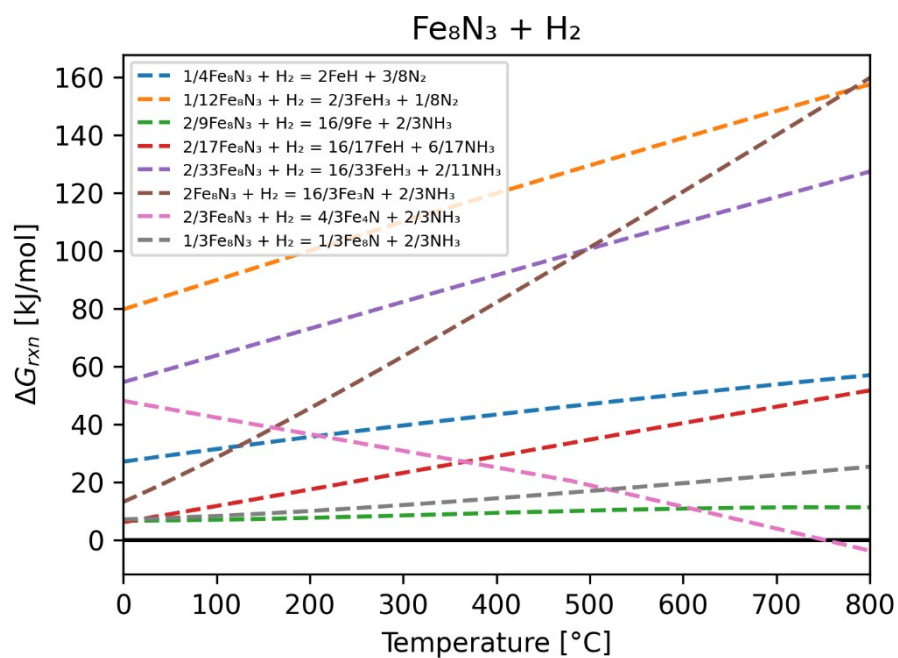

Figure S59: Ellingham diagram of the Fe<sub>8</sub>N<sub>3</sub> hydrogenation step: standard Gibbs free energy change per mol H<sub>2</sub> as a function of temperature.

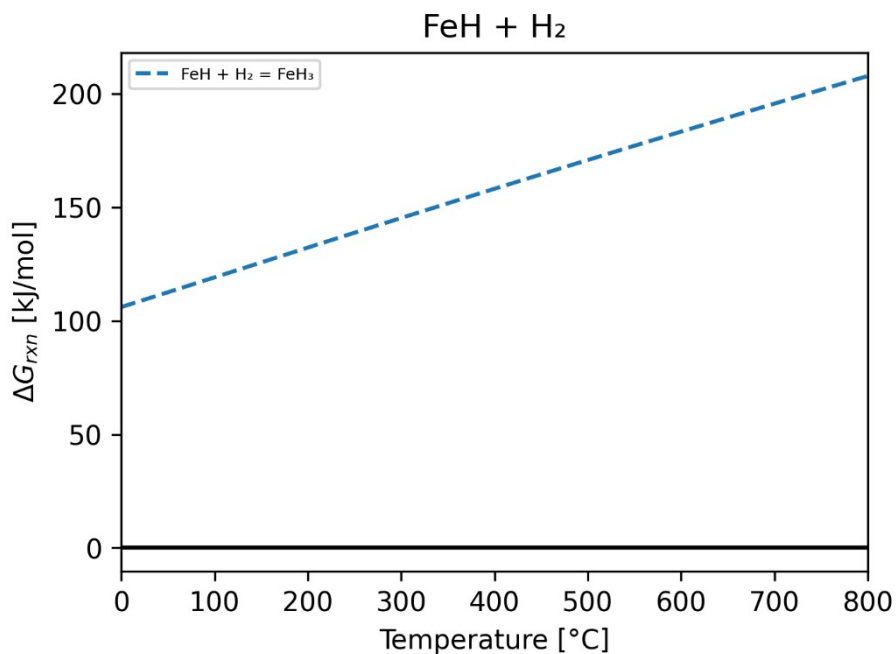

Figure S60: Ellingham diagram of the FeH hydrogenation step: standard Gibbs free energy change per mol H<sub>2</sub> as a function of temperature.

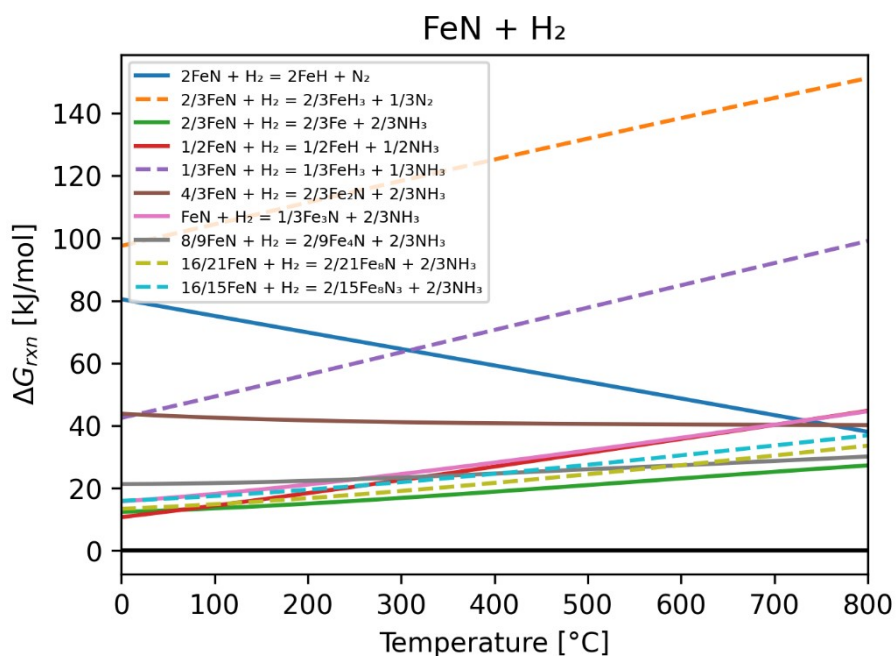

Figure S61: Ellingham diagram of the FeN hydrogenation step: standard Gibbs free energy change per mol H<sub>2</sub> as a function of temperature.

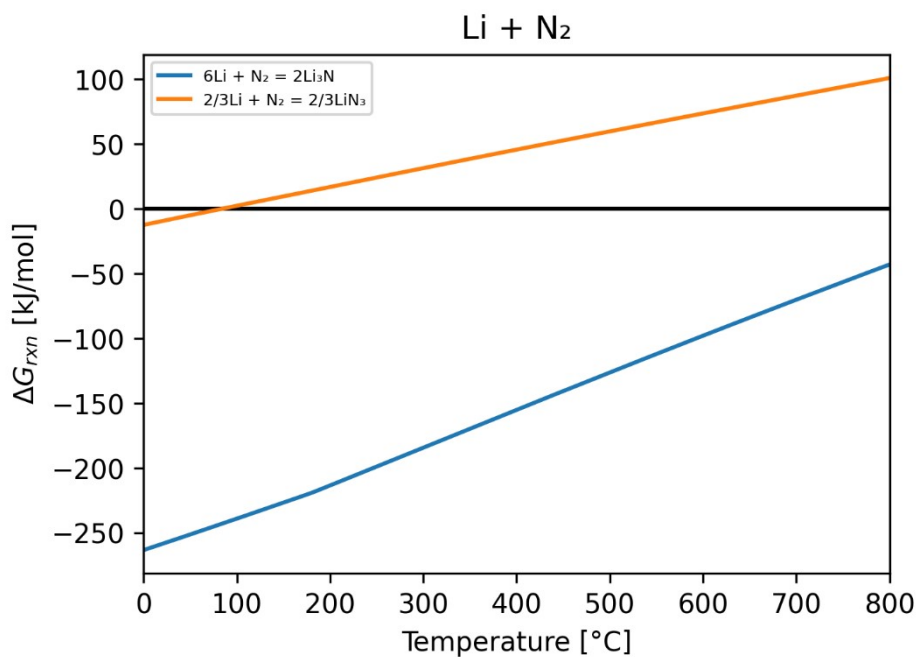

Figure S62: Ellingham diagram of the Li nitridation step: standard Gibbs free energy change per mol N<sub>2</sub> as a function of temperature.

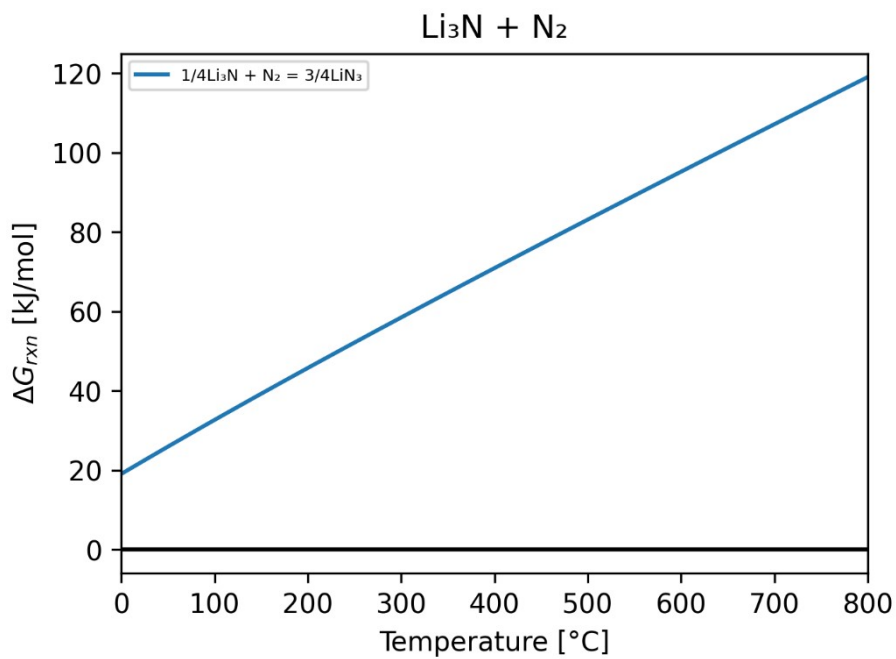

Figure S63: Ellingham diagram of the Li<sub>3</sub>N nitridation step: standard Gibbs free energy change per mol N<sub>2</sub> as a function of temperature.

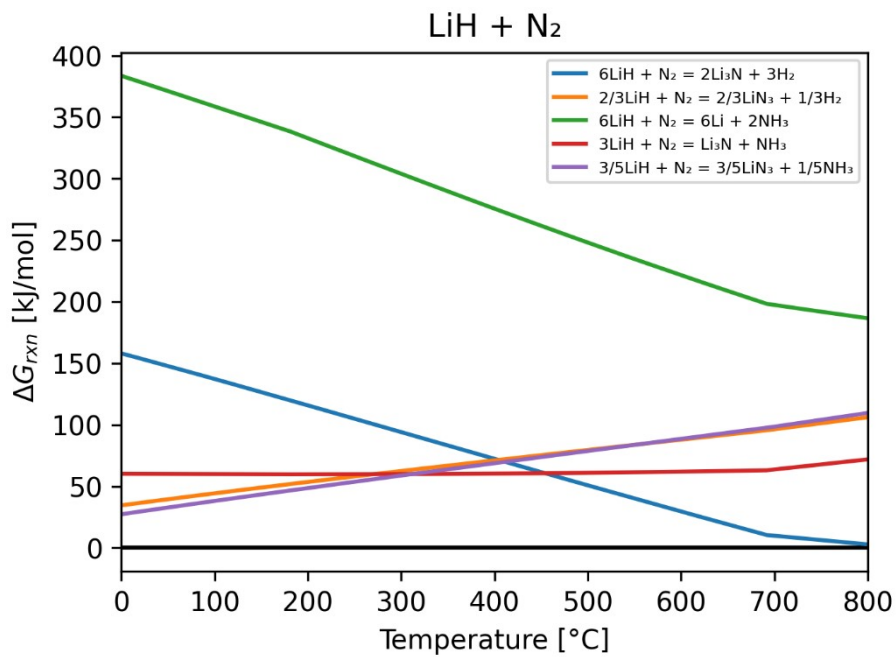

Figure S64: Ellingham diagram of the LiH nitridation step: standard Gibbs free energy change per mol N<sub>2</sub> as a function of temperature.

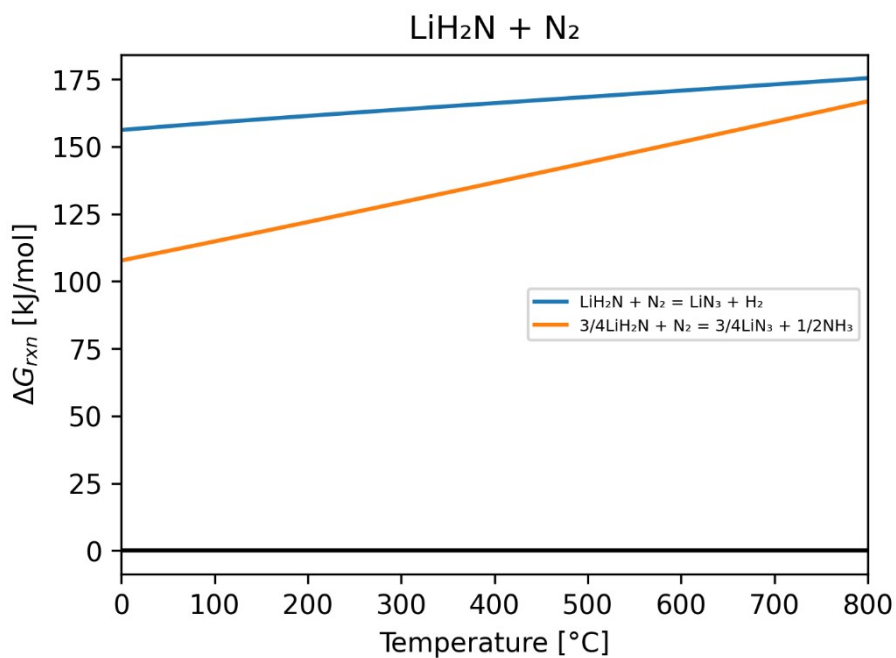

Figure S65: Ellingham diagram of the LiH<sub>2</sub>N nitridation step: standard Gibbs free energy change per mol N<sub>2</sub> as a function of temperature.

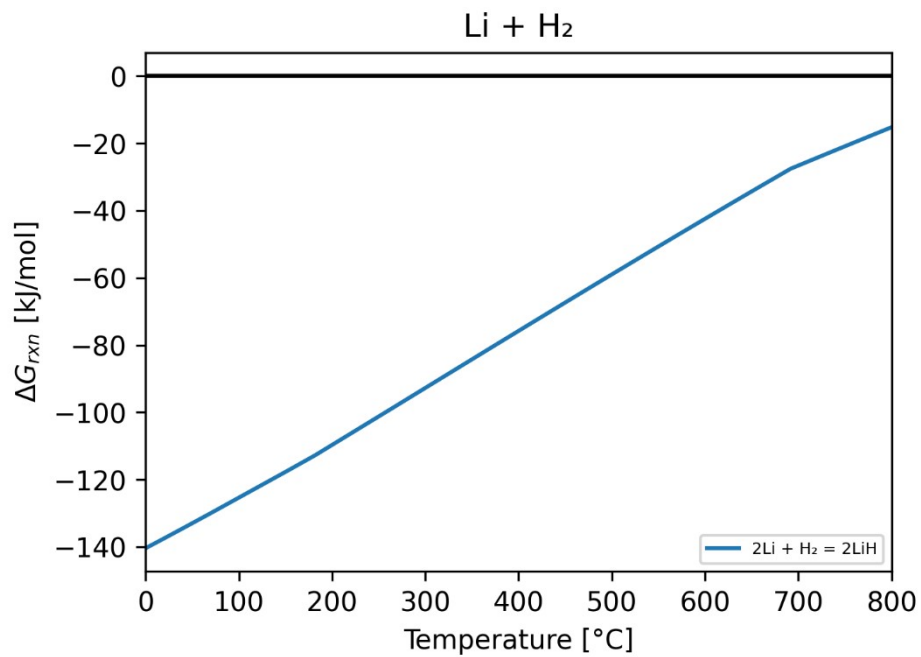

Figure S66: Ellingham diagram of the Li hydrogenation step: standard Gibbs free energy change per mol H<sub>2</sub> as a function of temperature.

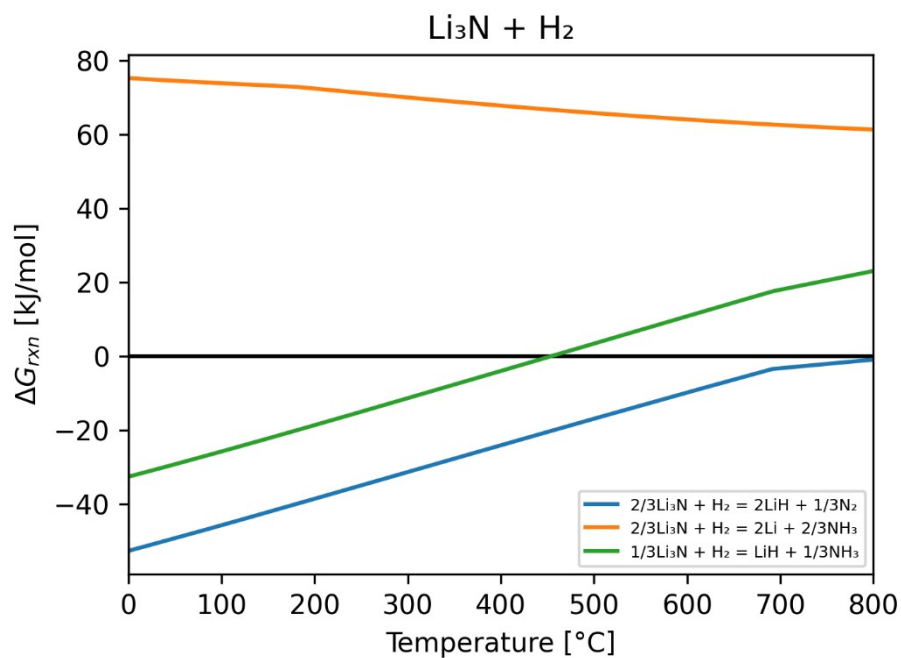

Figure S67: Ellingham diagram of the Li<sub>3</sub>N hydrogenation step: standard Gibbs free energy change per mol H<sub>2</sub> as a function of temperature.



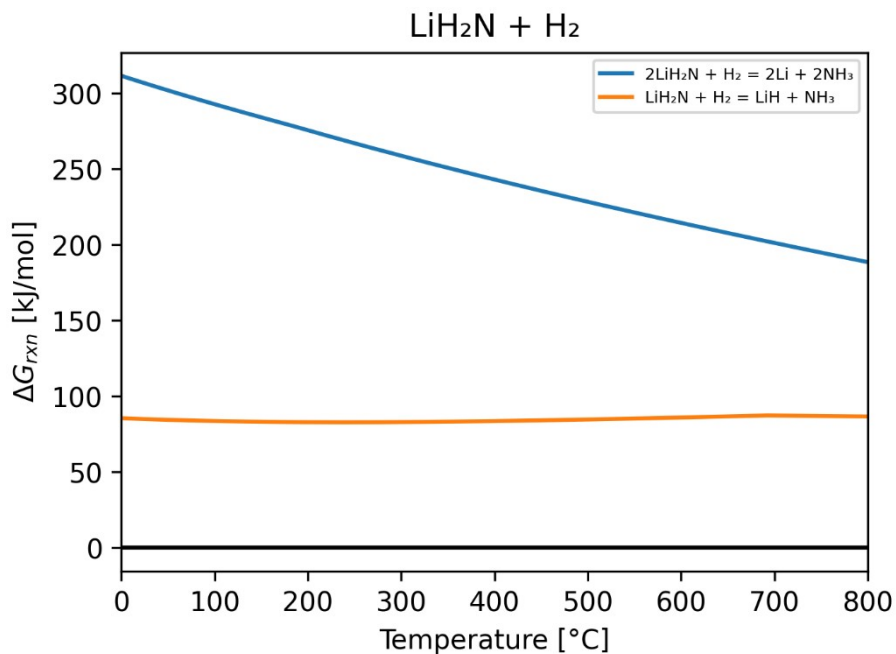

Figure S68: Ellingham diagram of the LiH<sub>2</sub>N hydrogenation step: standard Gibbs free energy change per mol H<sub>2</sub> as a function of temperature.

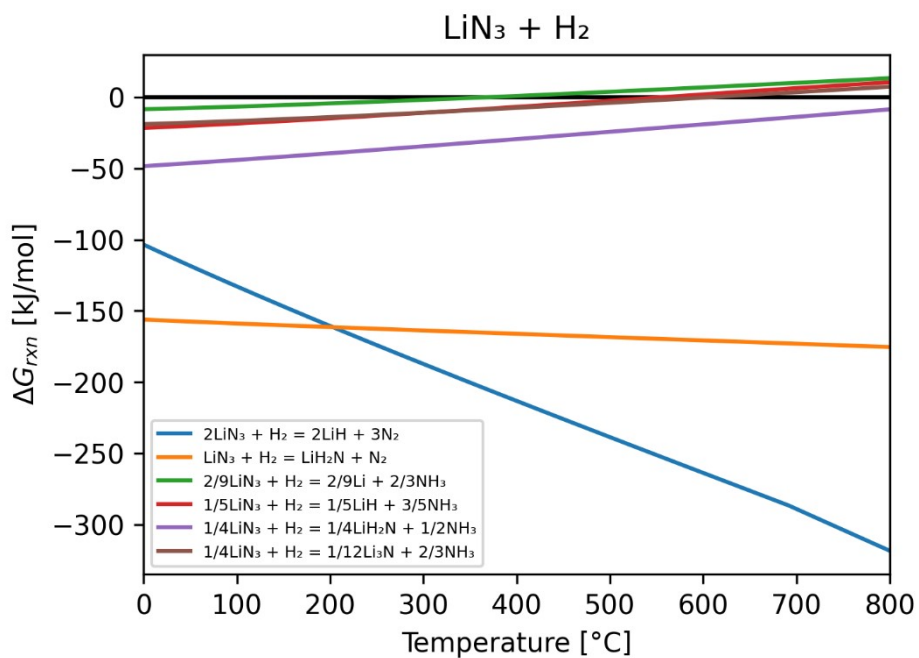

Figure S69: Ellingham diagram of the LiN<sub>3</sub> hydrogenation step: standard Gibbs free energy change per mol H<sub>2</sub> as a function of temperature.

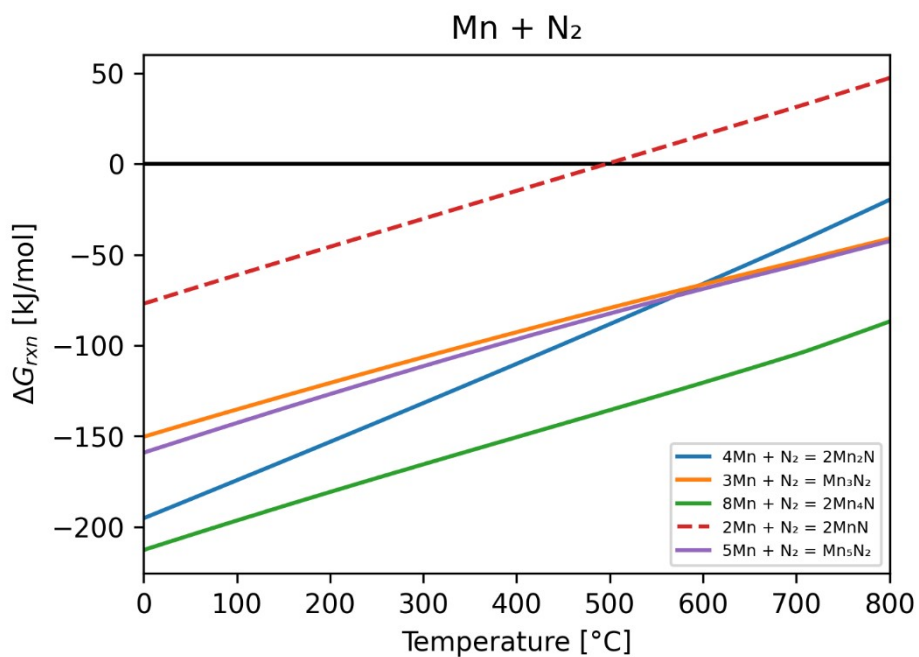

Figure S70: Ellingham diagram of the Mn nitridation step: standard Gibbs free energy change per mol N<sub>2</sub> as a function of temperature.

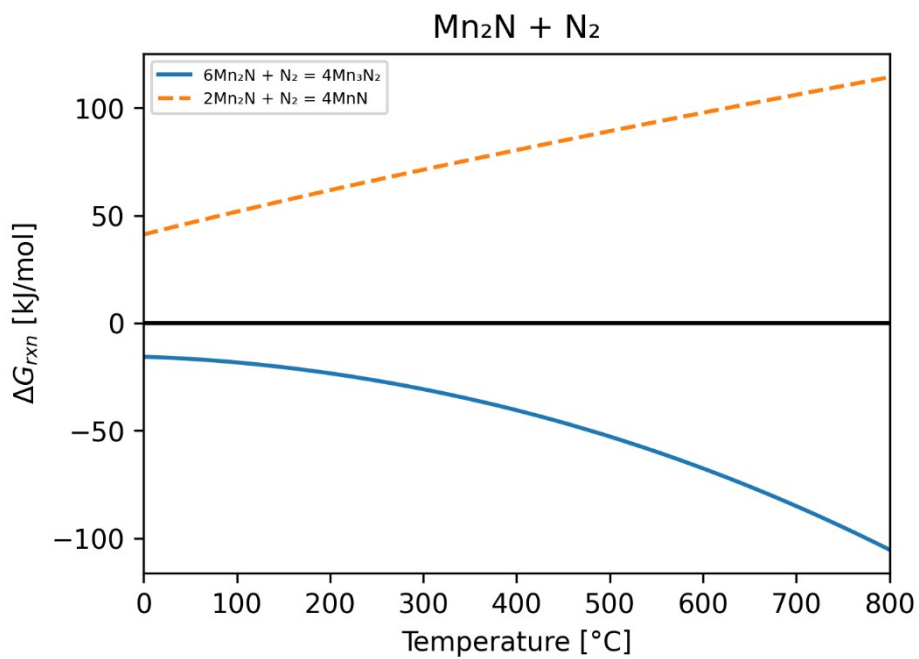

Figure S71: Ellingham diagram of the Mn<sub>2</sub>N nitridation step: standard Gibbs free energy change per mol N<sub>2</sub> as a function of temperature.

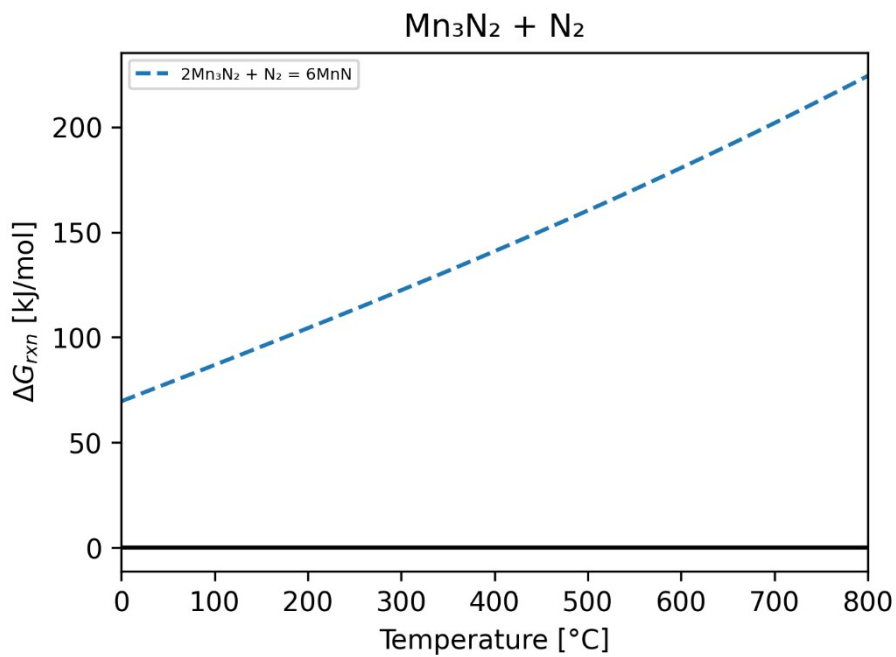

Figure S72: Ellingham diagram of the  $\text{Mn}_3\text{N}_2$  nitridation step: standard Gibbs free energy change per mol  $\text{N}_2$  as a function of temperature.

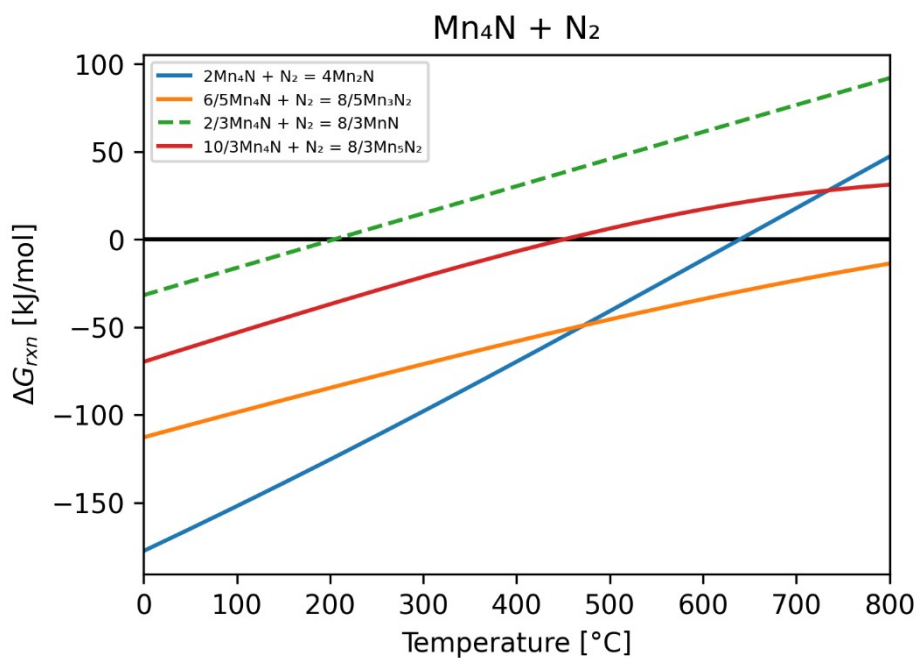

Figure S73: Ellingham diagram of the  $\text{Mn}_4\text{N}$  nitridation step: standard Gibbs free energy change per mol  $\text{N}_2$  as a function of temperature.

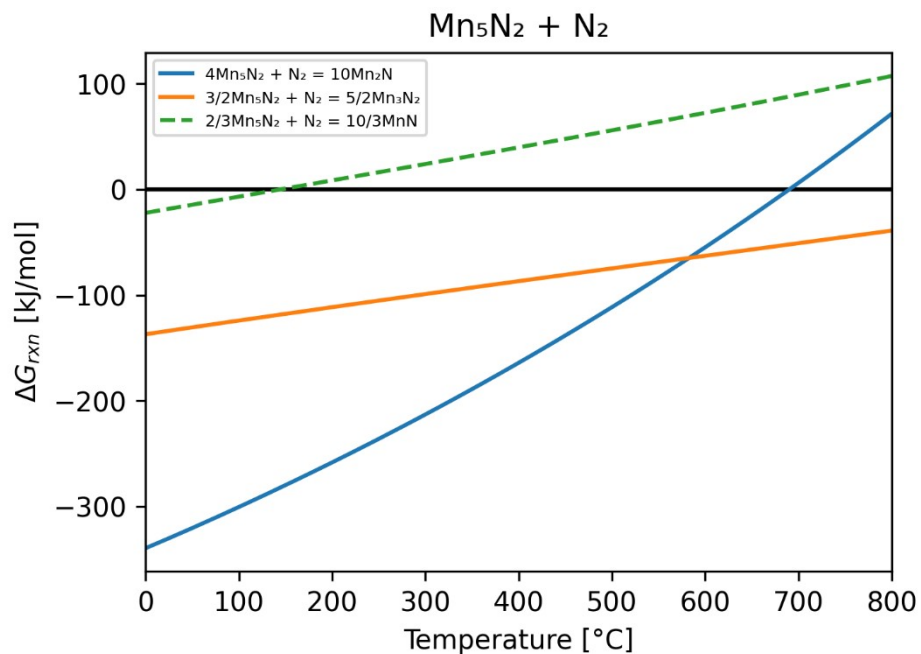

Figure S74: Ellingham diagram of the Mn<sub>5</sub>N<sub>2</sub> nitridation step: standard Gibbs free energy change per mol N<sub>2</sub> as a function of temperature.

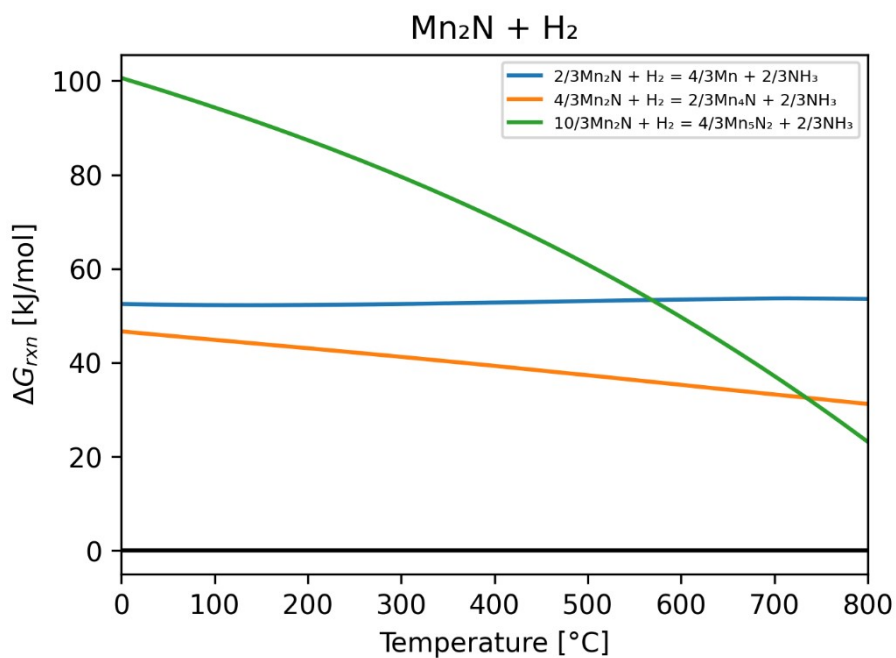

Figure S75: Ellingham diagram of the Mn<sub>2</sub>N hydrogenation step: standard Gibbs free energy change per mol H<sub>2</sub> as a function of temperature.

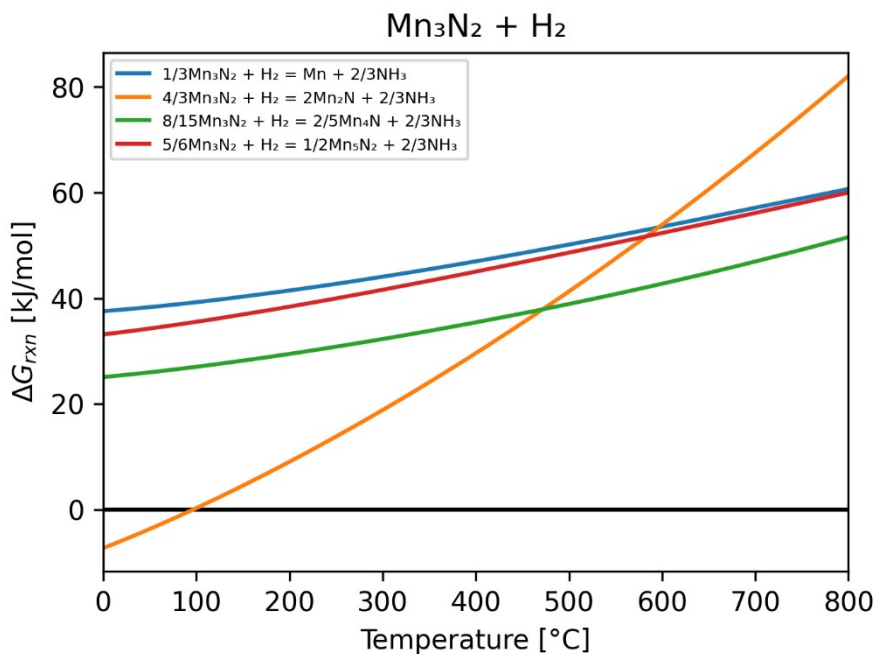

Figure S76: Ellingham diagram of the Mn<sub>3</sub>N<sub>2</sub> hydrogenation step: standard Gibbs free energy change per mol H<sub>2</sub> as a function of temperature.

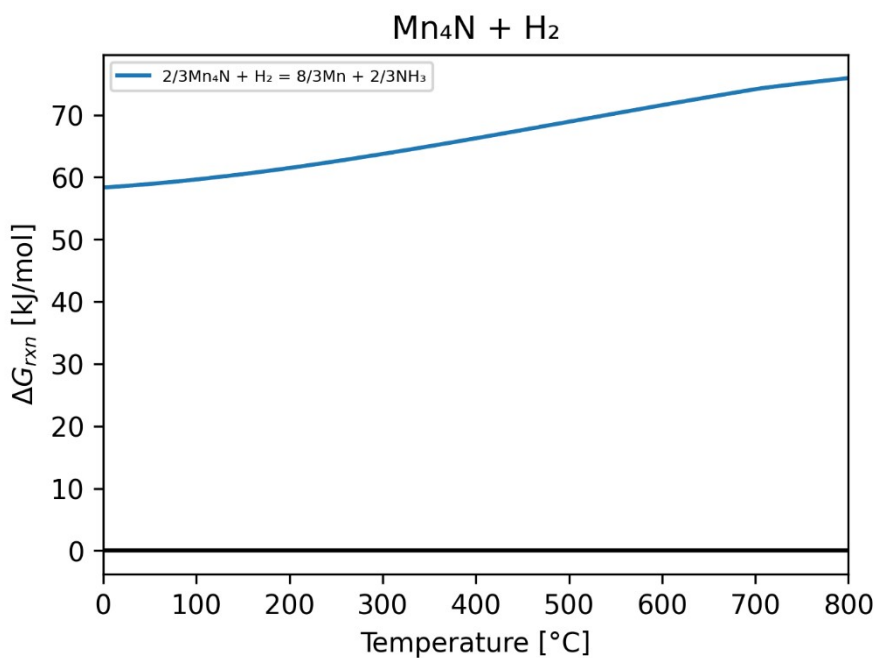

Figure S77: Ellingham diagram of the Mn<sub>4</sub>N hydrogenation step: standard Gibbs free energy change per mol H<sub>2</sub> as a function of temperature.

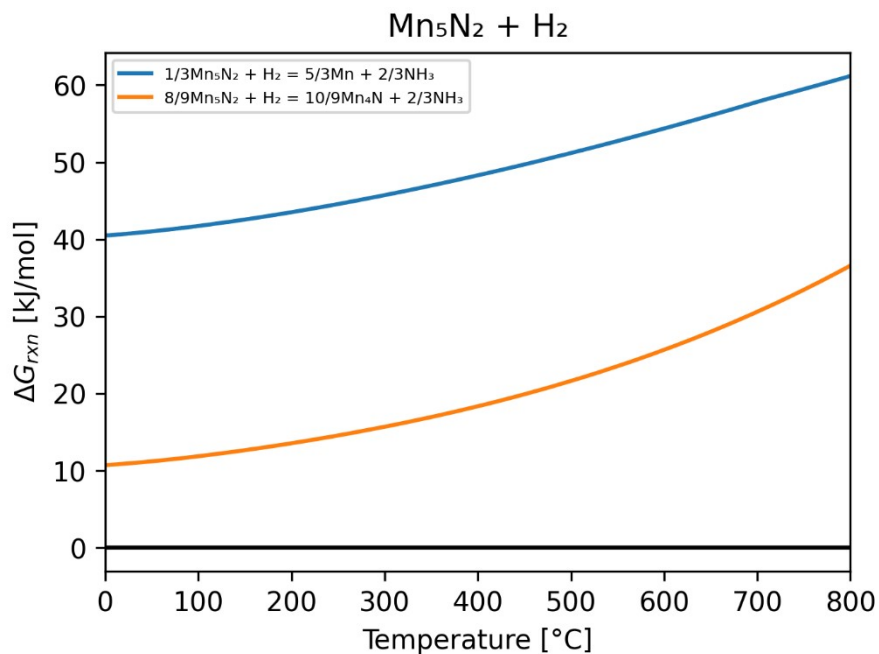

Figure S78: Ellingham diagram of the Mn<sub>5</sub>N<sub>2</sub> hydrogenation step: standard Gibbs free energy change per mol H<sub>2</sub> as a function of temperature.

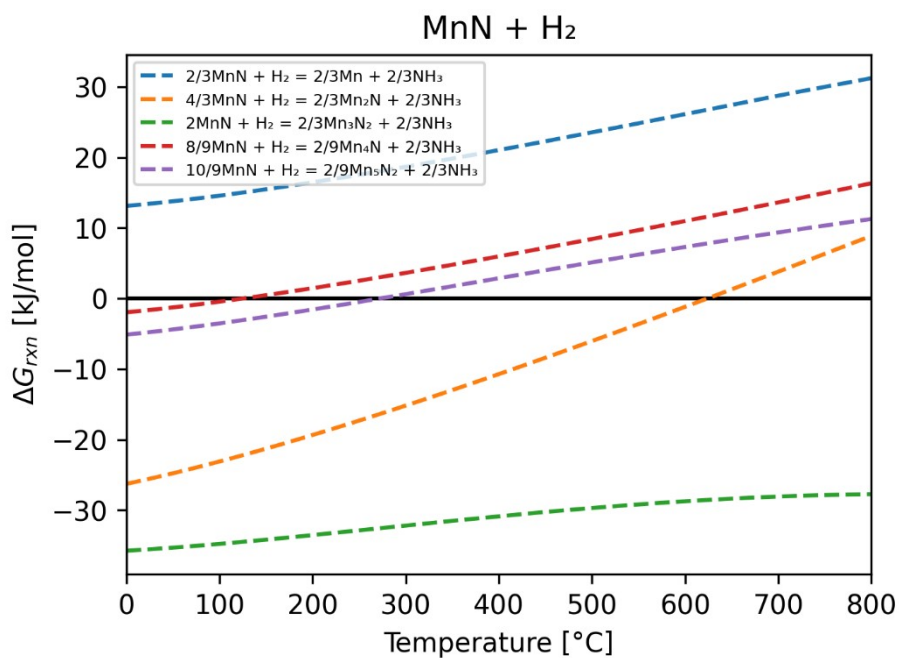

Figure S79: Ellingham diagram of the MnN hydrogenation step: standard Gibbs free energy change per mol H<sub>2</sub> as a function of temperature.

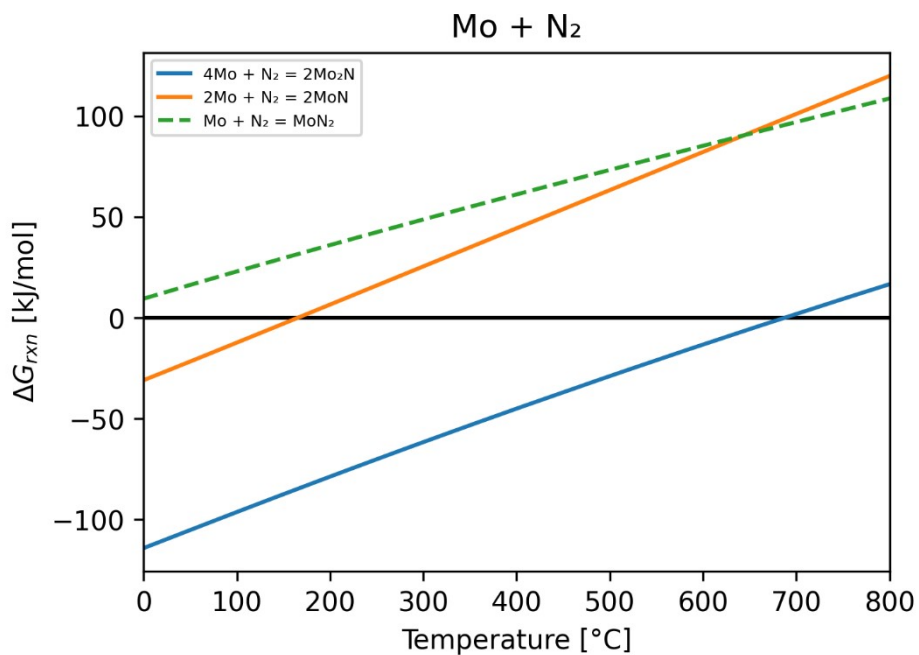

Figure S80: Ellingham diagram of the Mo nitridation step: standard Gibbs free energy change per mol N<sub>2</sub> as a function of temperature.

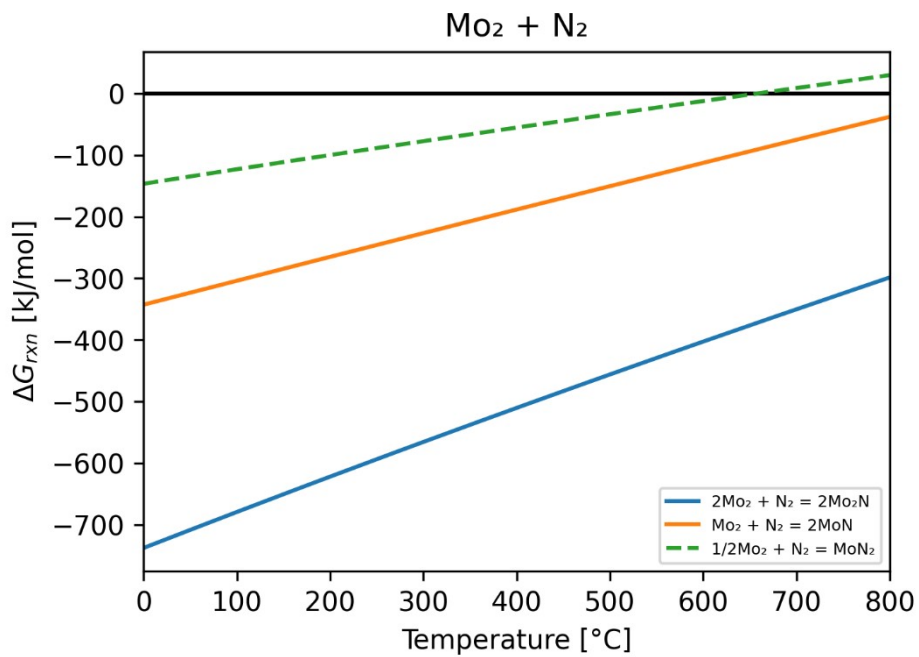

Figure S81: Ellingham diagram of the Mo<sub>2</sub> nitridation step: standard Gibbs free energy change per mol N<sub>2</sub> as a function of temperature.

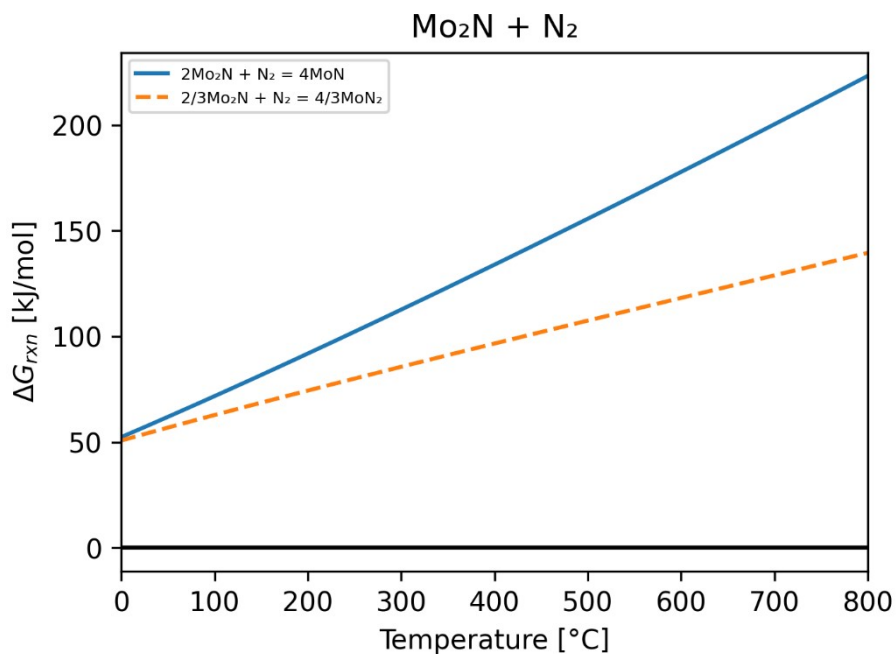

Figure S82: Ellingham diagram of the Mo<sub>2</sub>N nitridation step: standard Gibbs free energy change per mol N<sub>2</sub> as a function of temperature.

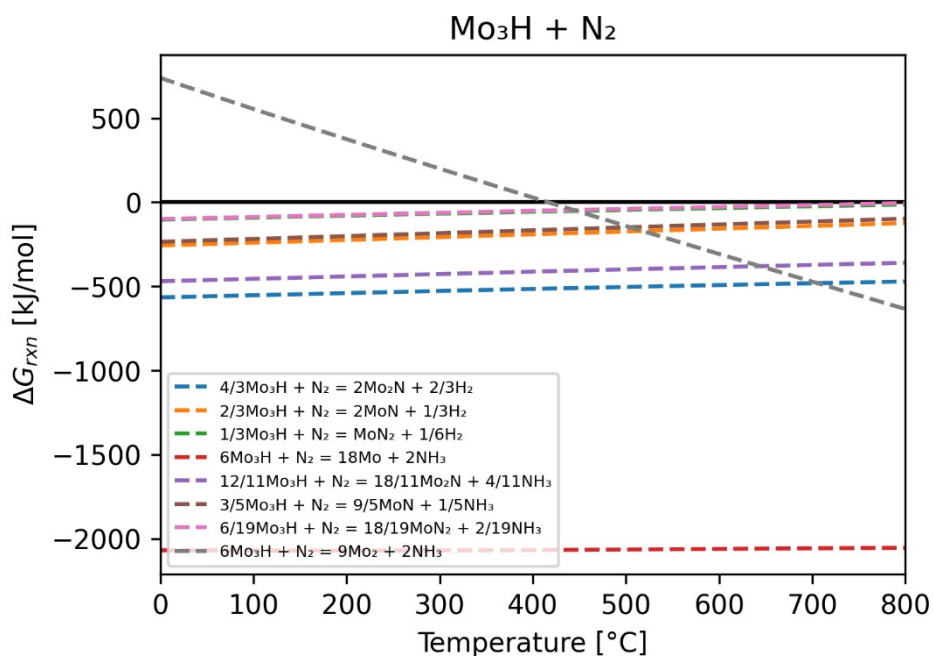

Figure S83: Ellingham diagram of the Mo<sub>3</sub>H nitridation step: standard Gibbs free energy change per mol N<sub>2</sub> as a function of temperature.



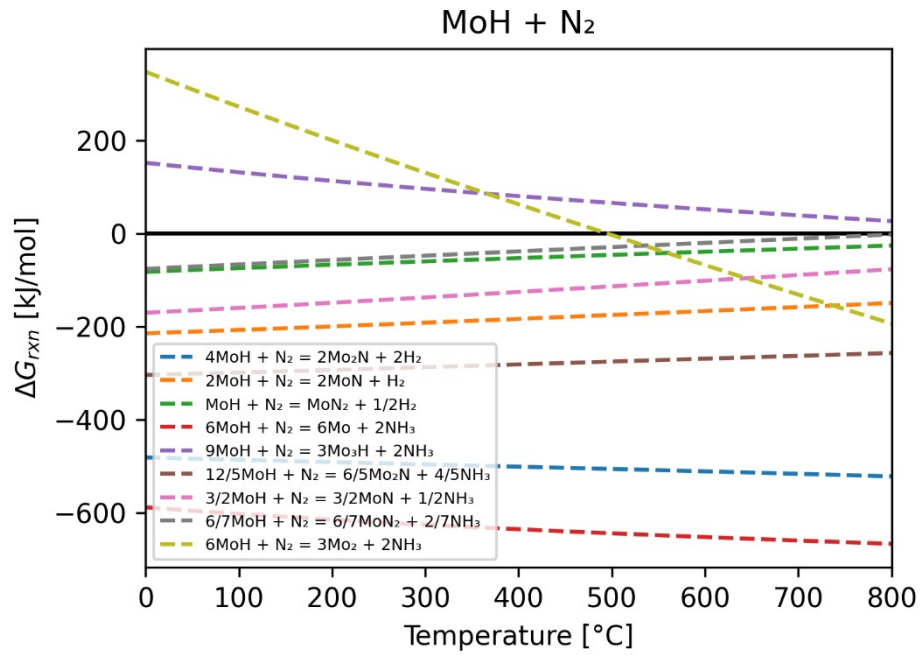

Figure S84: Ellingham diagram of the MoH nitridation step: standard Gibbs free energy change per mol N<sub>2</sub> as a function of temperature.

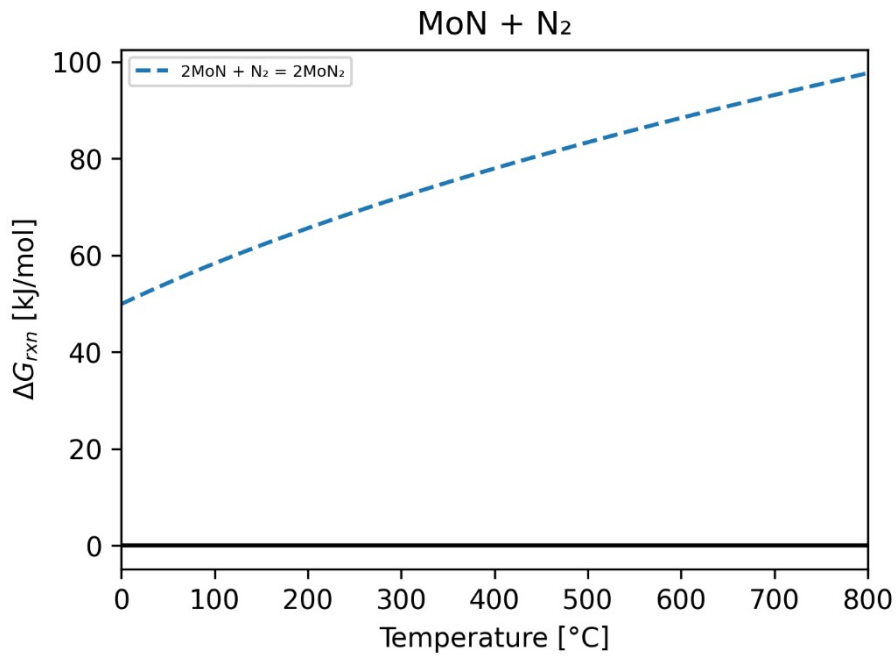

Figure S85: Ellingham diagram of the MoN nitridation step: standard Gibbs free energy change per mol N<sub>2</sub> as a function of temperature.

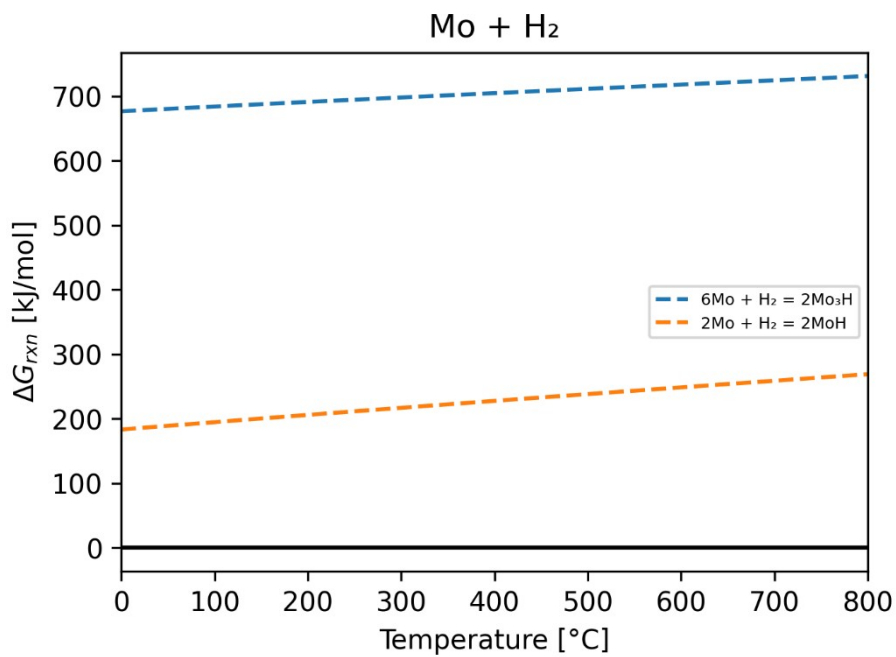

Figure S86: Ellingham diagram of the Mo hydrogenation step: standard Gibbs free energy change per mol H<sub>2</sub> as a function of temperature.

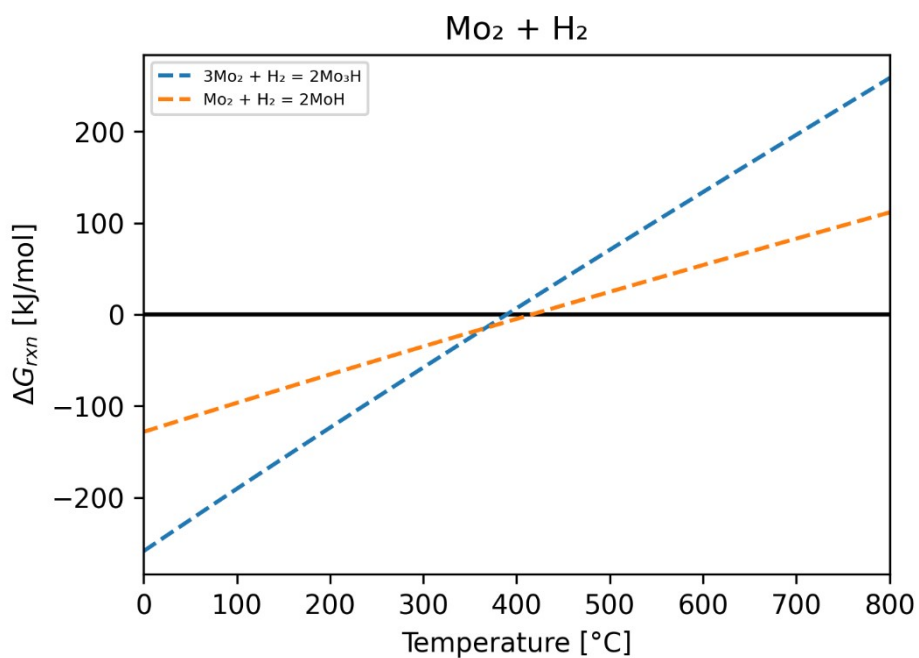

Figure S87: Ellingham diagram of the Mo<sub>2</sub> hydrogenation step: standard Gibbs free energy change per mol H<sub>2</sub> as a function of temperature.

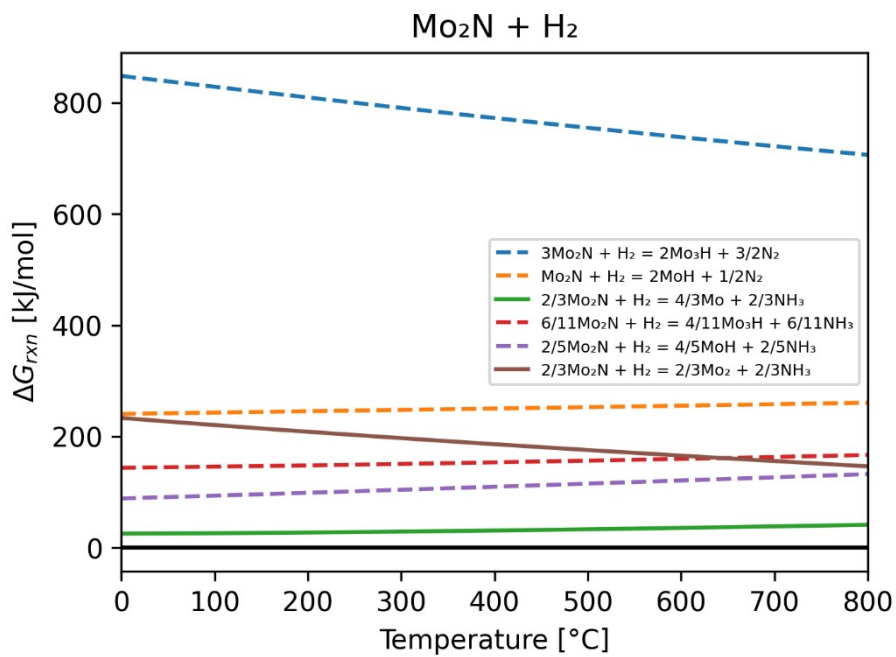

Figure S88: Ellingham diagram of the Mo<sub>2</sub>N hydrogenation step: standard Gibbs free energy change per mol H<sub>2</sub> as a function of temperature.

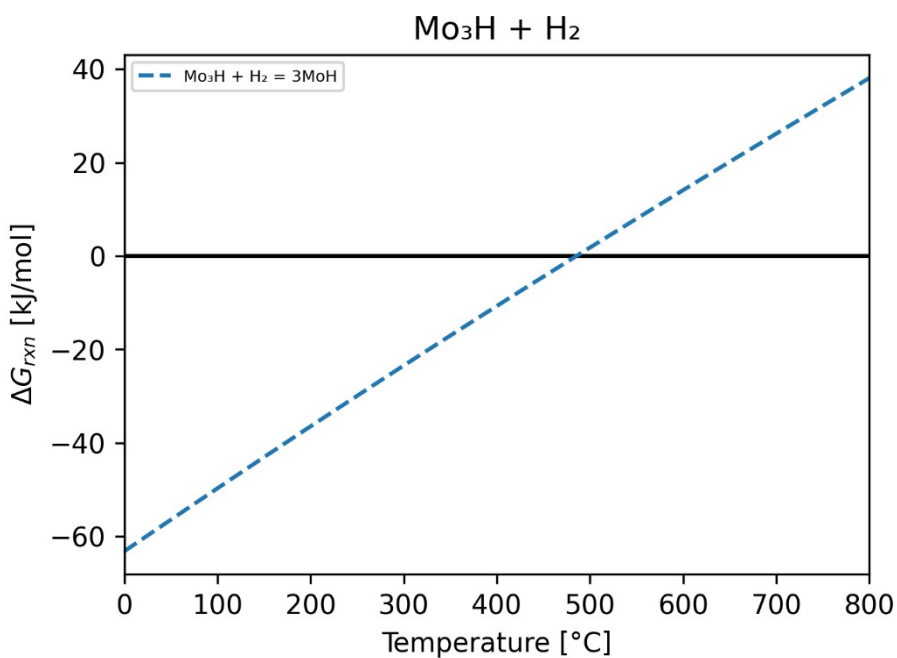

Figure S89: Ellingham diagram of the Mo<sub>3</sub>H hydrogenation step: standard Gibbs free energy change per mol H<sub>2</sub> as a function of temperature.

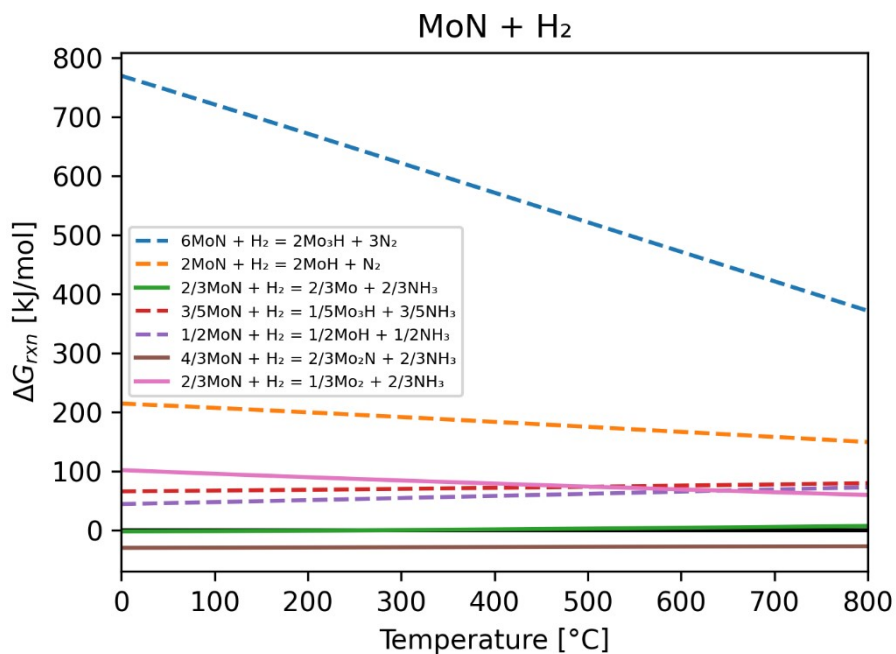

Figure S90: Ellingham diagram of the MoN hydrogenation step: standard Gibbs free energy change per mol H<sub>2</sub> as a function of temperature.

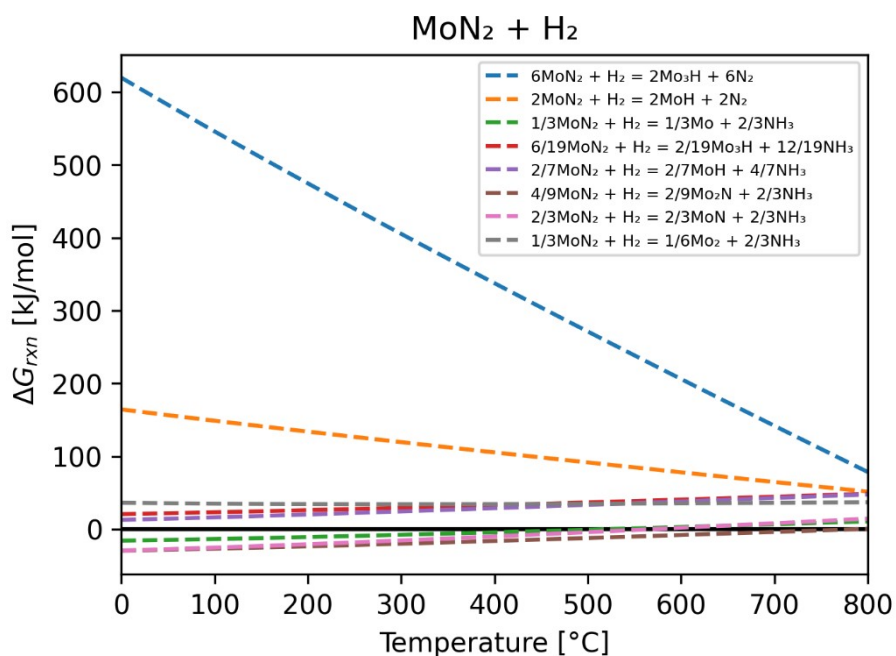

Figure S91: Ellingham diagram of the MoN<sub>2</sub> hydrogenation step: standard Gibbs free energy change per mol H<sub>2</sub> as a function of temperature.

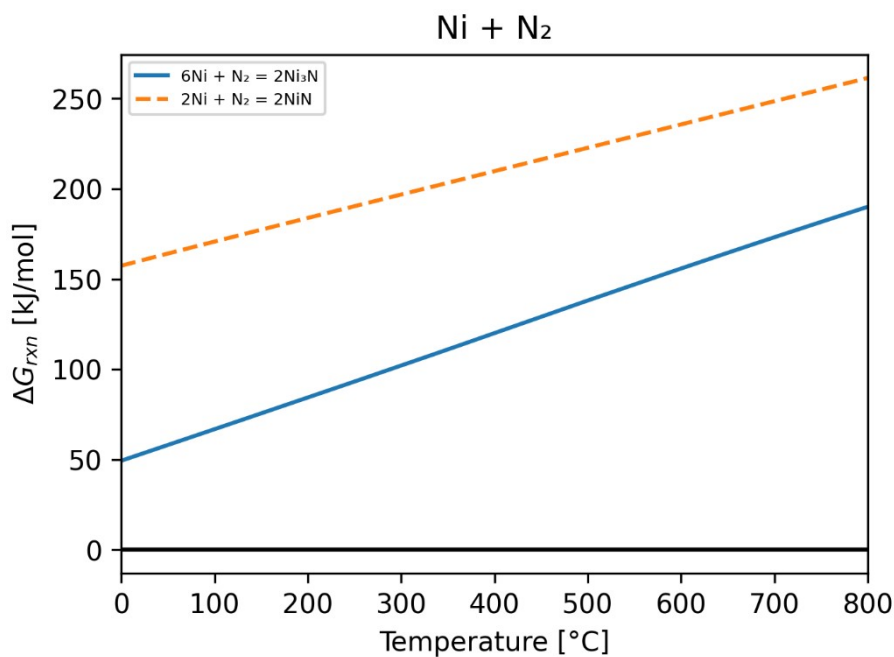

Figure S92: Ellingham diagram of the Ni nitridation step: standard Gibbs free energy change per mol N<sub>2</sub> as a function of temperature.

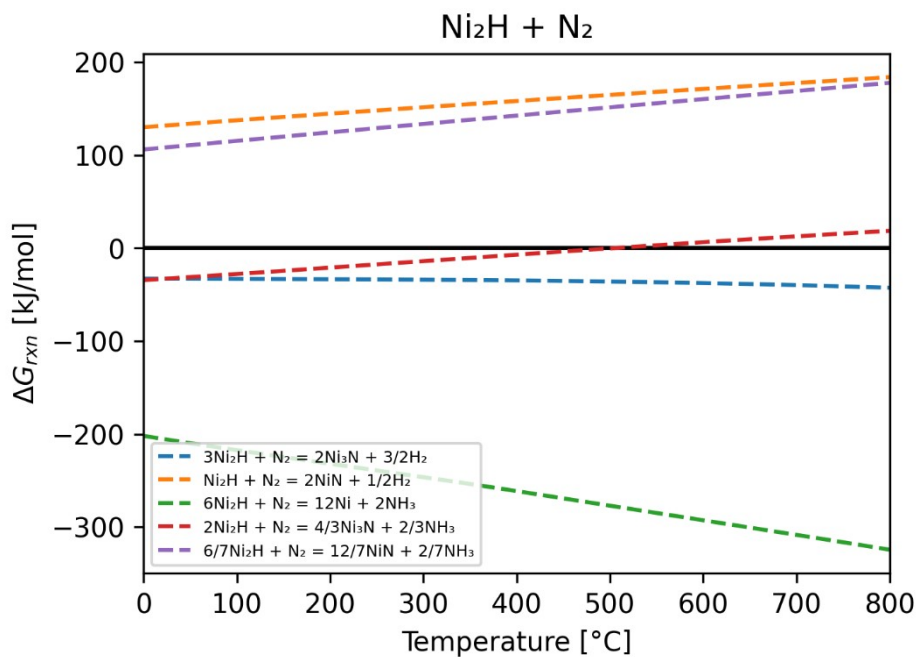

Figure S93: Ellingham diagram of the Ni<sub>2</sub>H nitridation step: standard Gibbs free energy change per mol N<sub>2</sub> as a function of temperature.

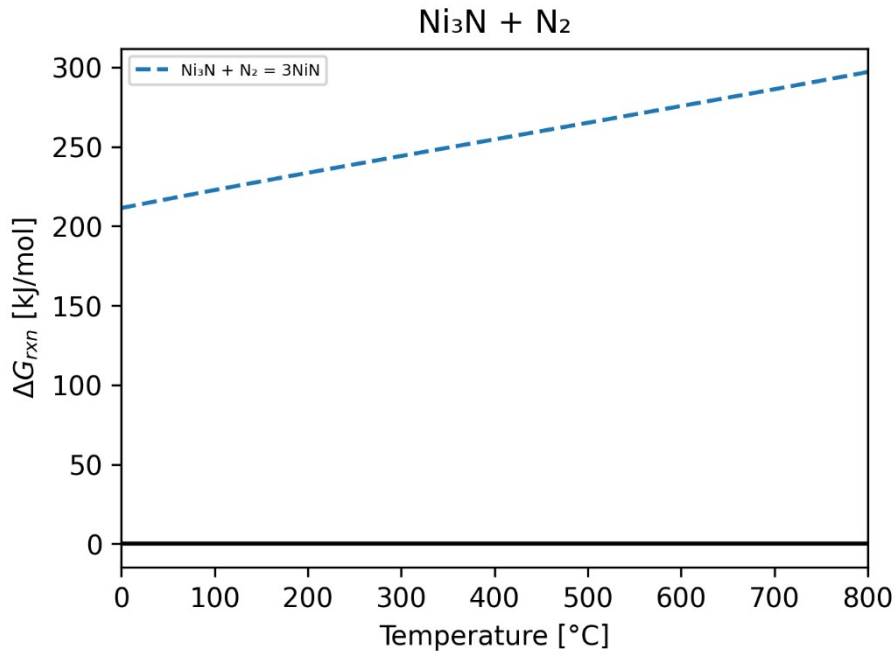

Figure S94: Ellingham diagram of the Ni<sub>3</sub>N nitridation step: standard Gibbs free energy change per mol N<sub>2</sub> as a function of temperature.

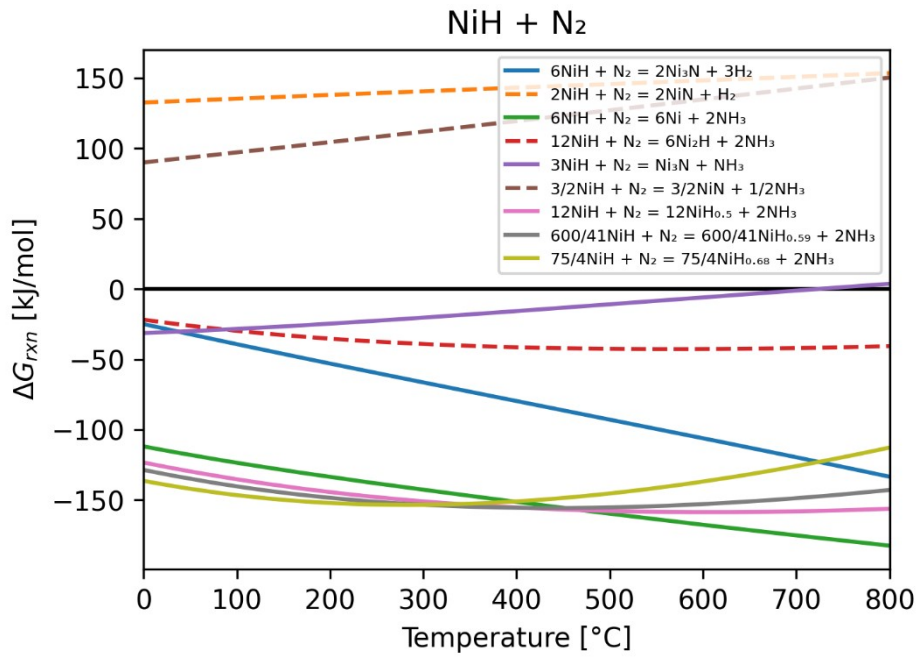

Figure S95: Ellingham diagram of the NiH nitridation step: standard Gibbs free energy change per mol N<sub>2</sub> as a function of temperature.

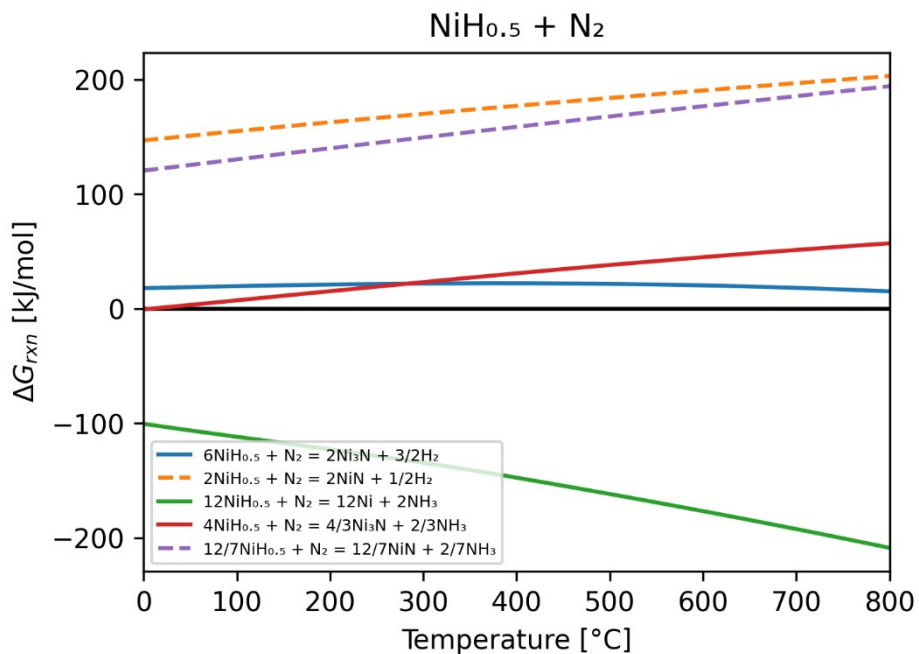

Figure S96: Ellingham diagram of the NiH<sub>0.5</sub> nitridation step: standard Gibbs free energy change per mol N<sub>2</sub> as a function of temperature.

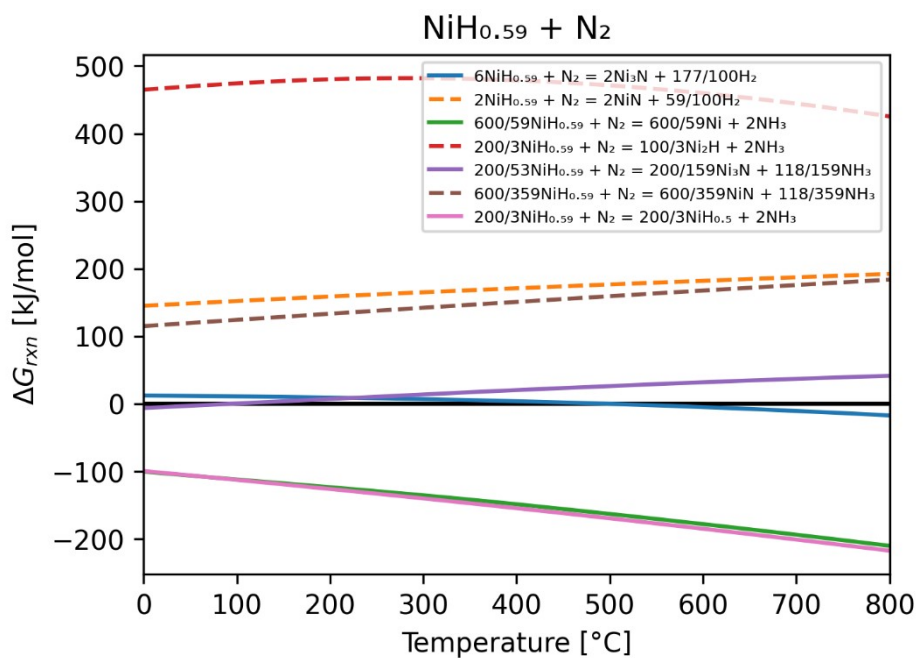

Figure S97: Ellingham diagram of the NiH<sub>0.59</sub> nitridation step: standard Gibbs free energy change per mol N<sub>2</sub> as a function of temperature.

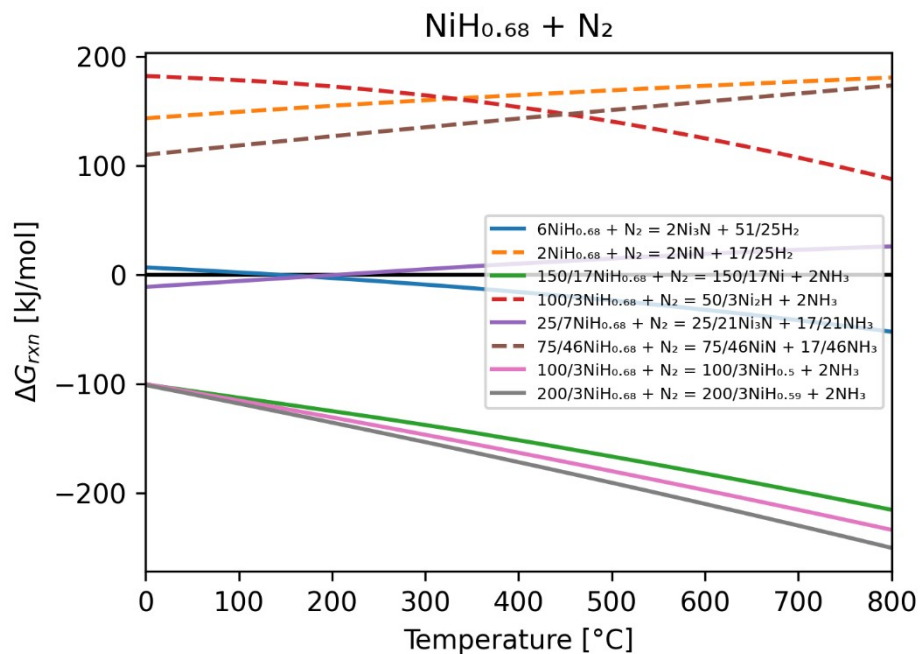

Figure S98: Ellingham diagram of the NiH<sub>0.68</sub> nitridation step: standard Gibbs free energy change per mol N<sub>2</sub> as a function of temperature.

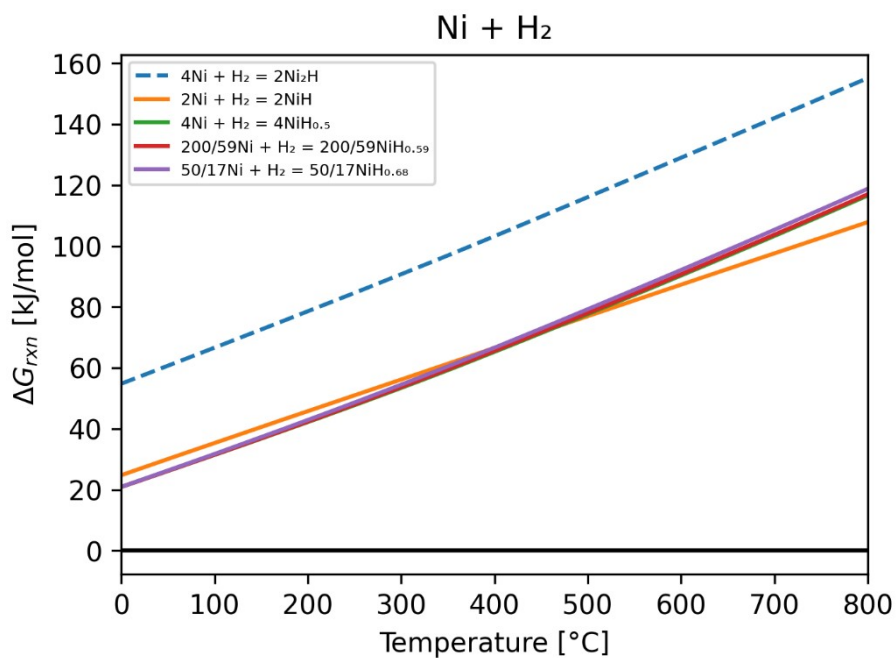

Figure S99: Ellingham diagram of the Ni hydrogenation step: standard Gibbs free energy change per mol H<sub>2</sub> as a function of temperature.



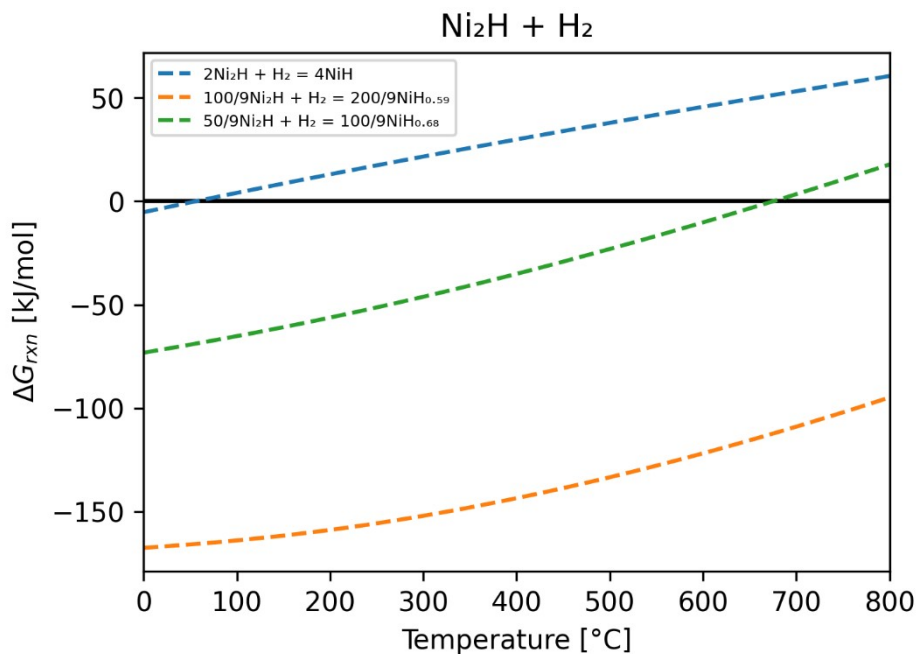

Figure S100: Ellingham diagram of the Ni<sub>2</sub>H hydrogenation step: standard Gibbs free energy change per mol H<sub>2</sub> as a function of temperature.

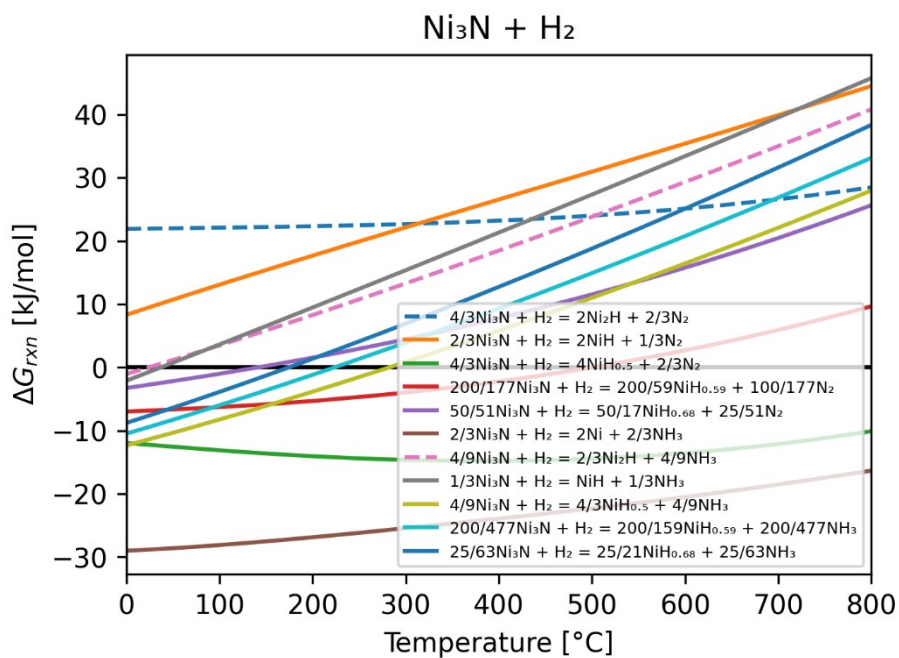

Figure S101: Ellingham diagram of the Ni<sub>3</sub>N hydrogenation step: standard Gibbs free energy change per mol H<sub>2</sub> as a function of temperature.

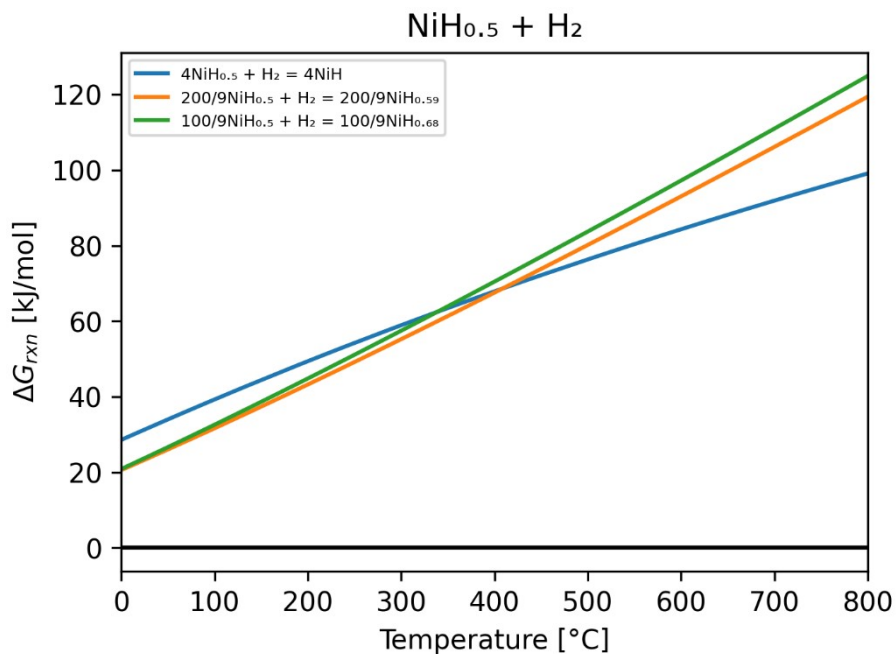

Figure S102: Ellingham diagram of the NiH<sub>0.5</sub> hydrogenation step: standard Gibbs free energy change per mol H<sub>2</sub> as a function of temperature.

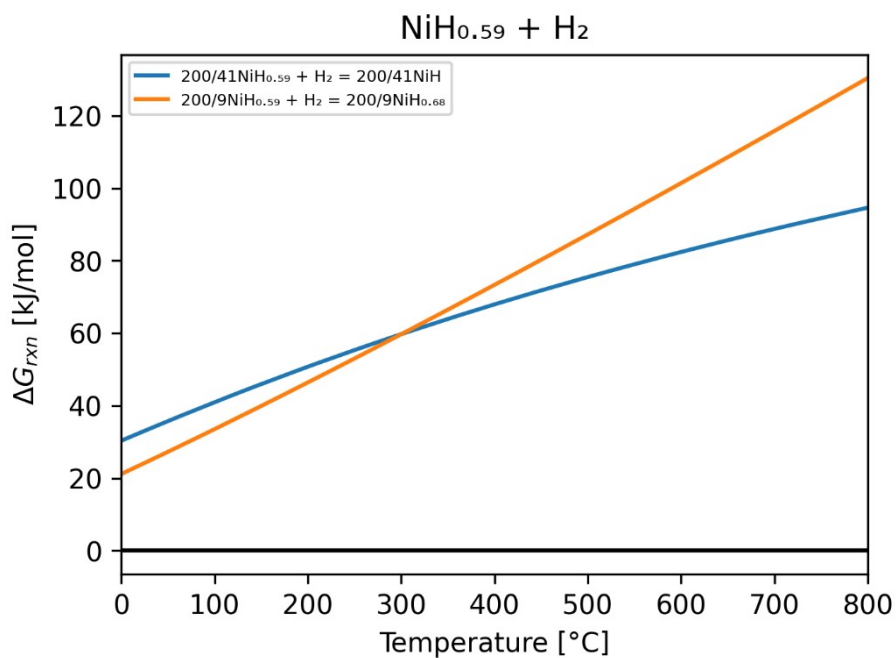

Figure S103: Ellingham diagram of the NiH<sub>0.59</sub> hydrogenation step: standard Gibbs free energy change per mol H<sub>2</sub> as a function of temperature.

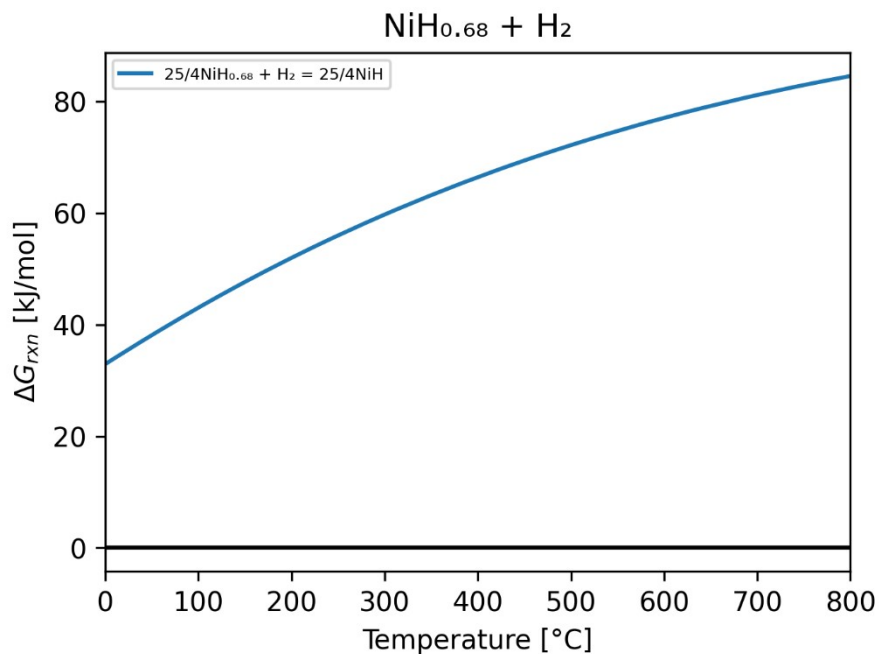

Figure S104: Ellingham diagram of the NiH<sub>0.68</sub> hydrogenation step: standard Gibbs free energy change per mol H<sub>2</sub> as a function of temperature.

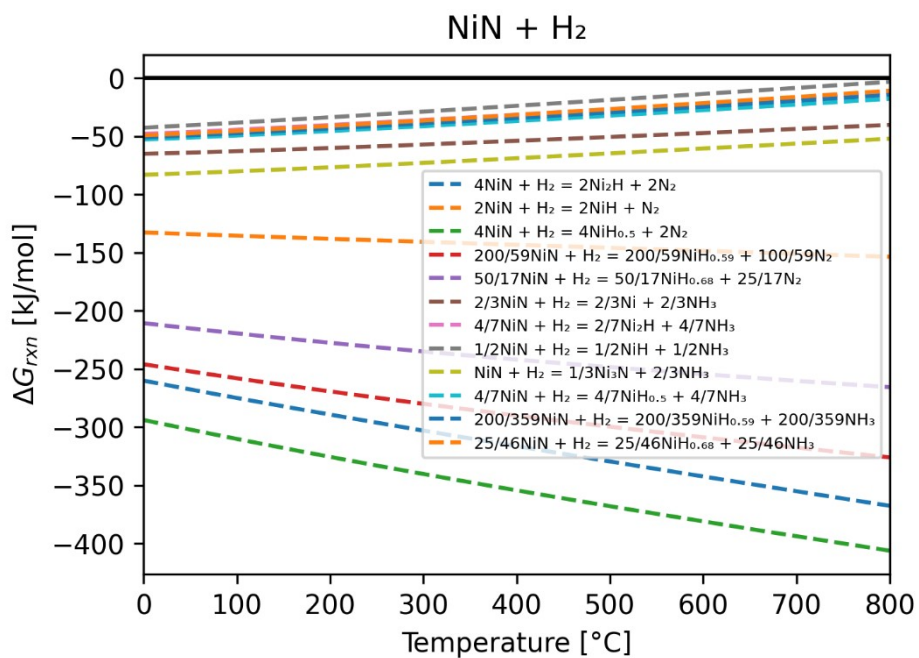

Figure S105: Ellingham diagram of the NiN hydrogenation step: standard Gibbs free energy change per mol H<sub>2</sub> as a function of temperature.

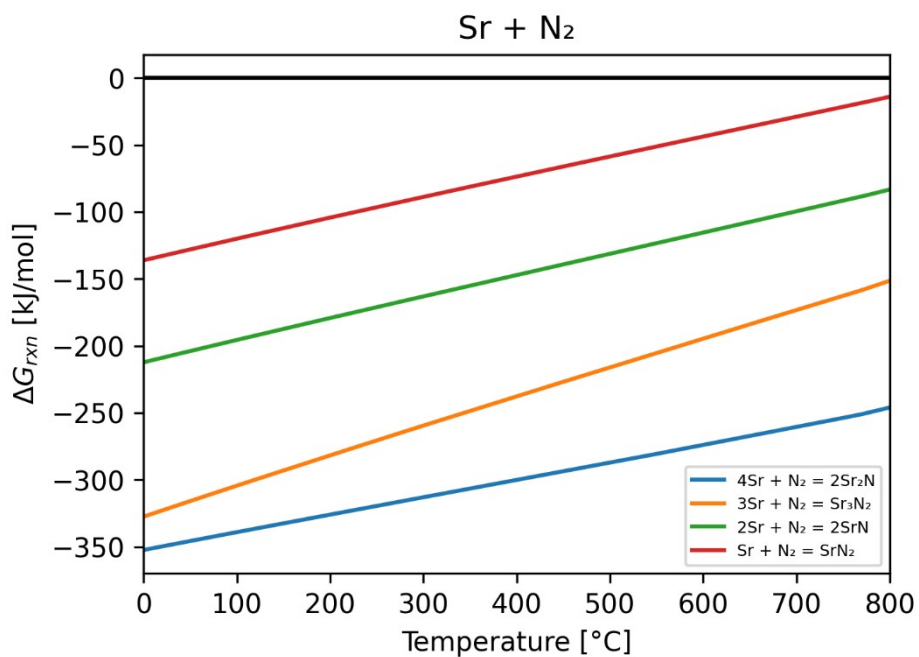

Figure S106: Ellingham diagram of the Sr nitridation step: standard Gibbs free energy change per mol N<sub>2</sub> as a function of temperature.

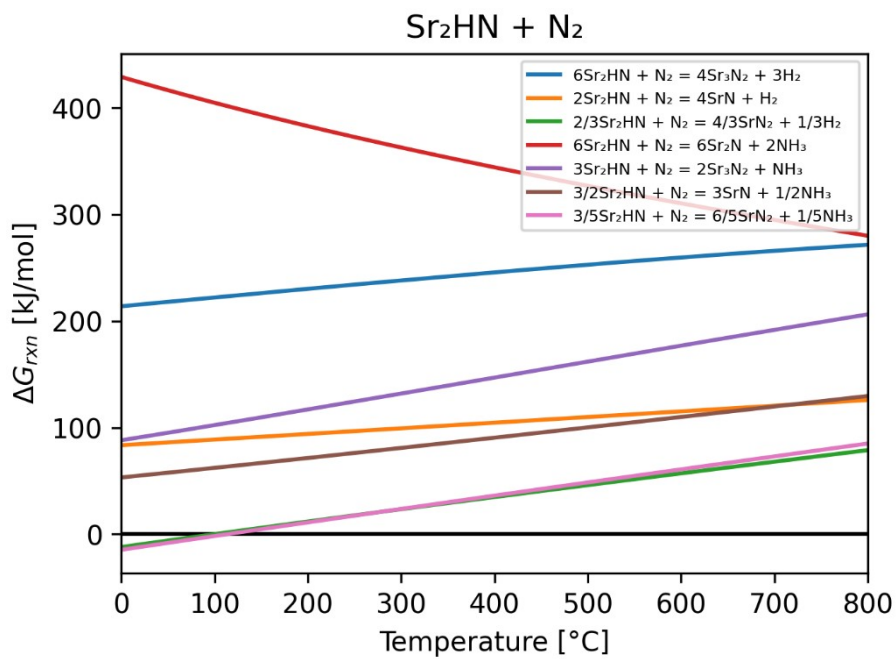

Figure S107: Ellingham diagram of the Sr<sub>2</sub>HN nitridation step: standard Gibbs free energy change per mol N<sub>2</sub> as a function of temperature.

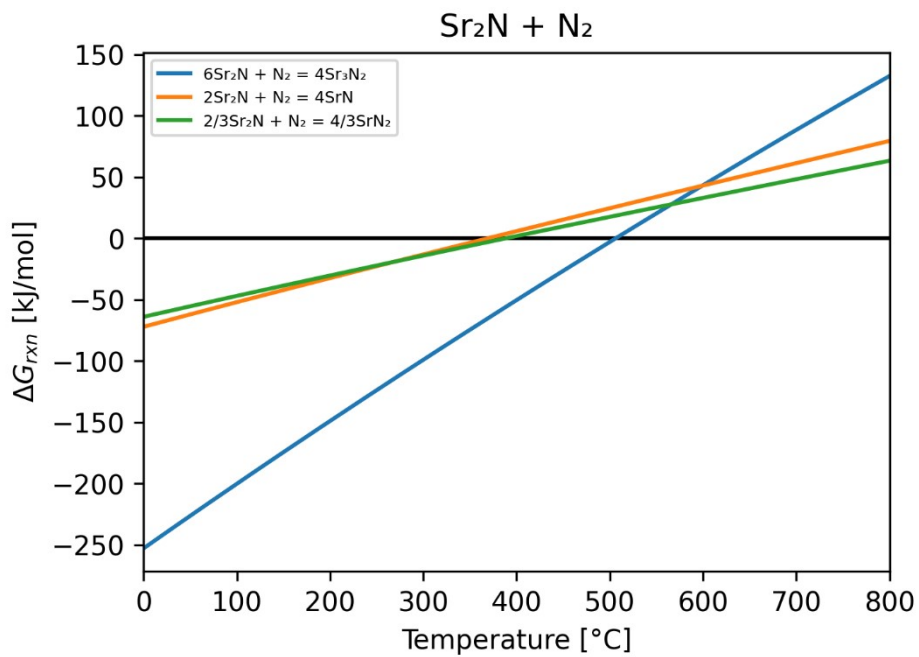

Figure S108: Ellingham diagram of the Sr<sub>2</sub>N nitridation step: standard Gibbs free energy change per mol N<sub>2</sub> as a function of temperature.

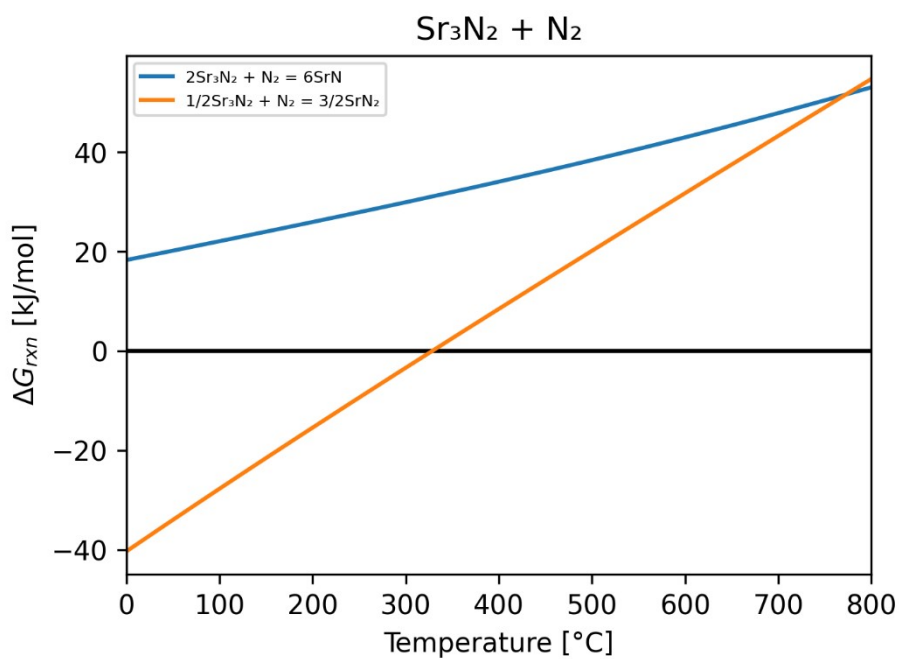

Figure S109: Ellingham diagram of the Sr<sub>3</sub>N<sub>2</sub> nitridation step: standard Gibbs free energy change per mol N<sub>2</sub> as a function of temperature.

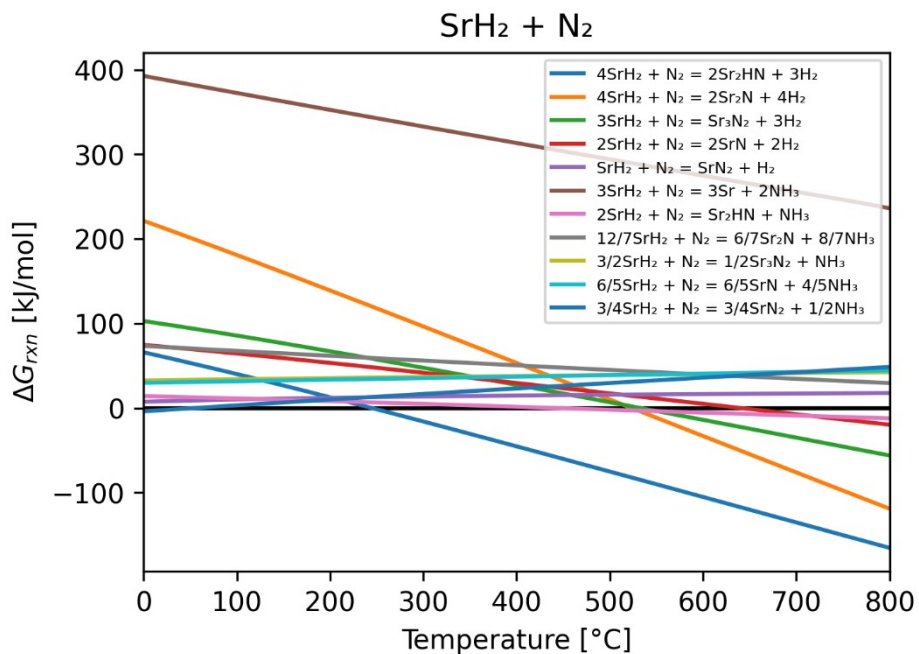

Figure S110: Ellingham diagram of the SrH<sub>2</sub> nitridation step: standard Gibbs free energy change per mol N<sub>2</sub> as a function of temperature.

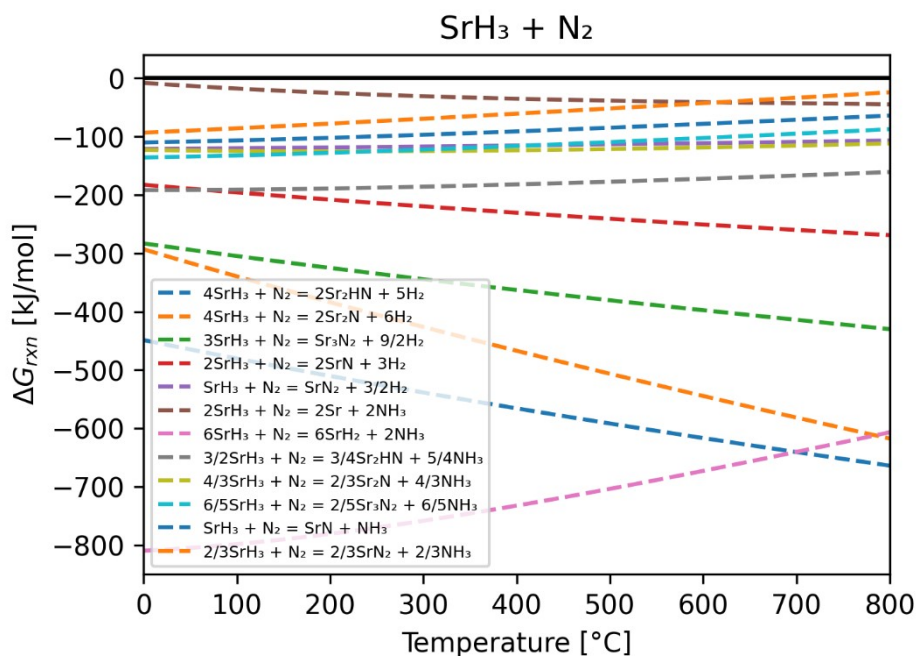

Figure S111: Ellingham diagram of the SrH<sub>3</sub> nitridation step: standard Gibbs free energy change per mol N<sub>2</sub> as a function of temperature.

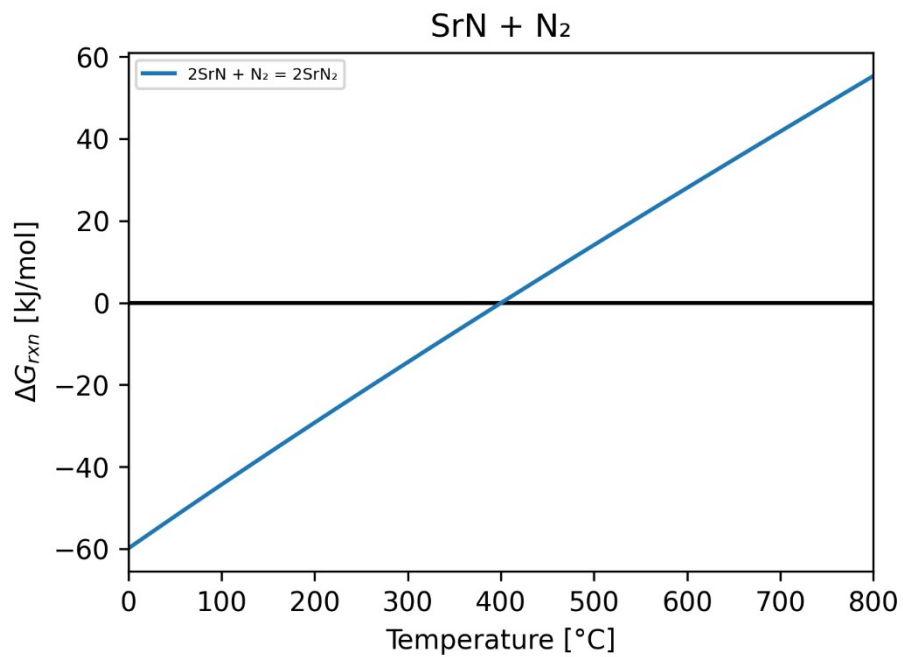

Figure S112: Ellingham diagram of the SrN nitridation step: standard Gibbs free energy change per mol N<sub>2</sub> as a function of temperature.

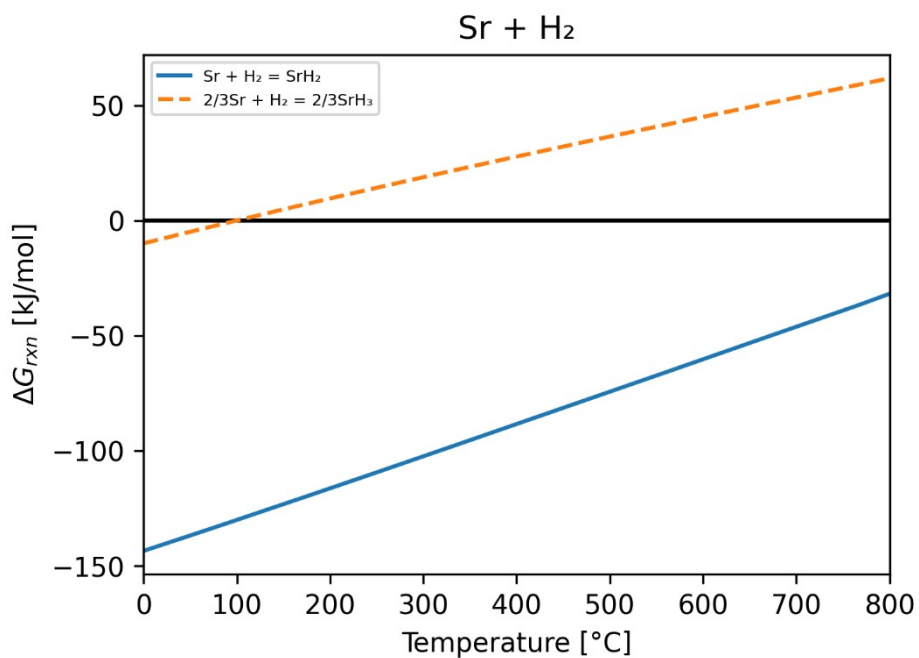

Figure S113: Ellingham diagram of the Sr hydrogenation step: standard Gibbs free energy change per mol H<sub>2</sub> as a function of temperature.

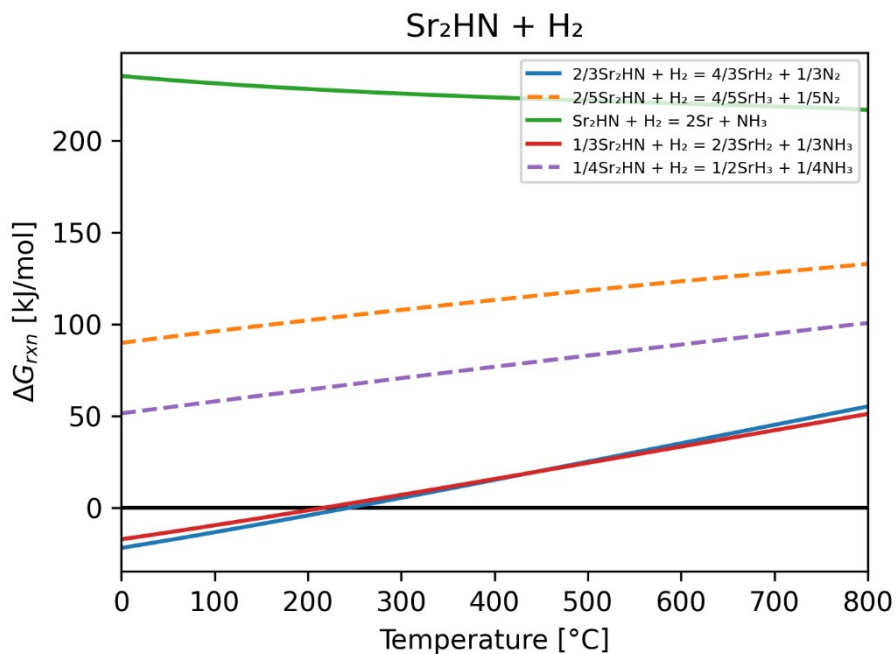

Figure S114: Ellingham diagram of the Sr<sub>2</sub>HN hydrogenation step: standard Gibbs free energy change per mol H<sub>2</sub> as a function of temperature.

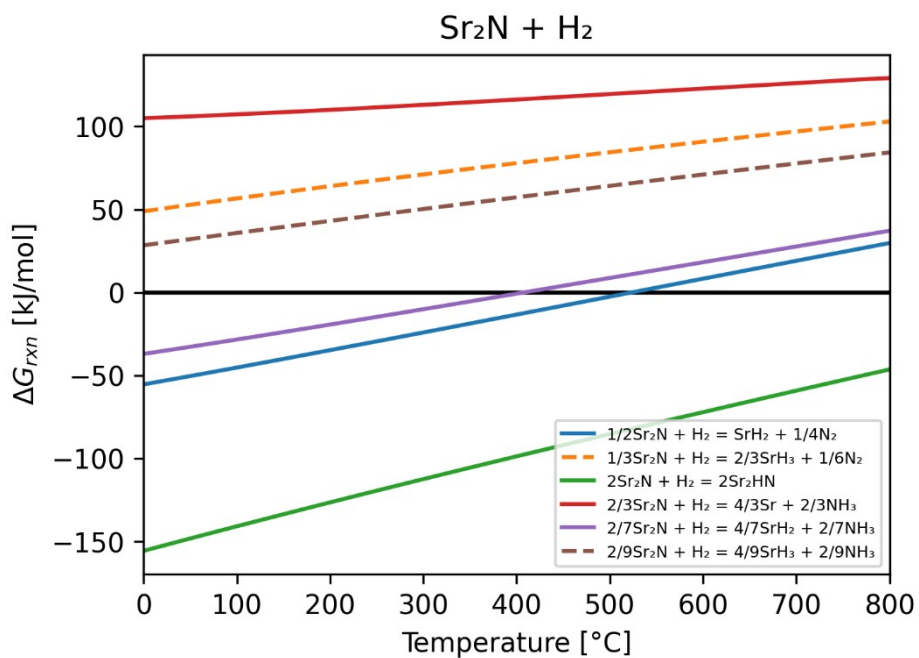

Figure S115: Ellingham diagram of the Sr<sub>2</sub>N hydrogenation step: standard Gibbs free energy change per mol H<sub>2</sub> as a function of temperature.



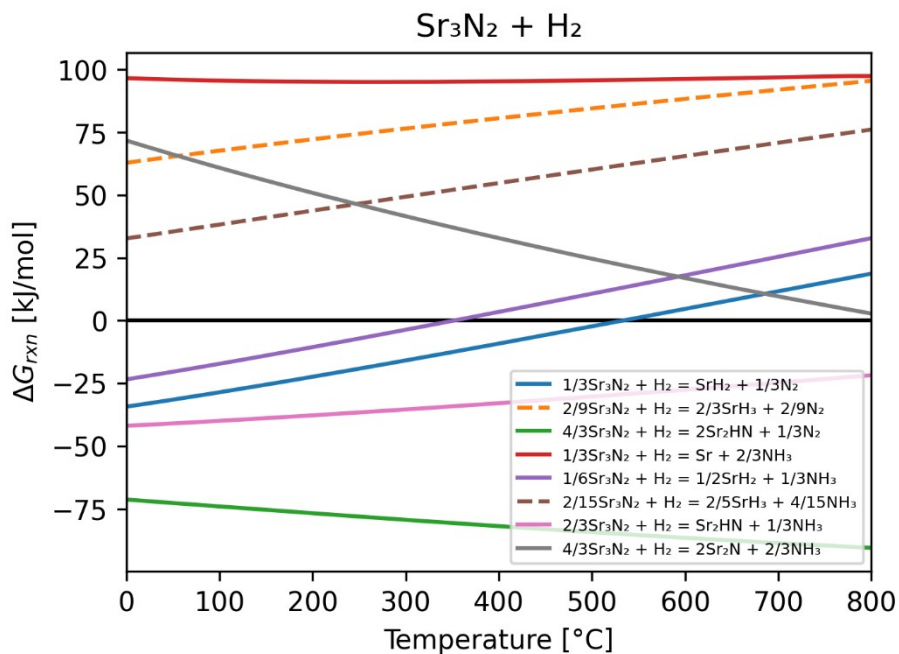

Figure S116: Ellingham diagram of the  $\text{Sr}_3\text{N}_2$  hydrogenation step: standard Gibbs free energy change per mol  $\text{H}_2$  as a function of temperature.

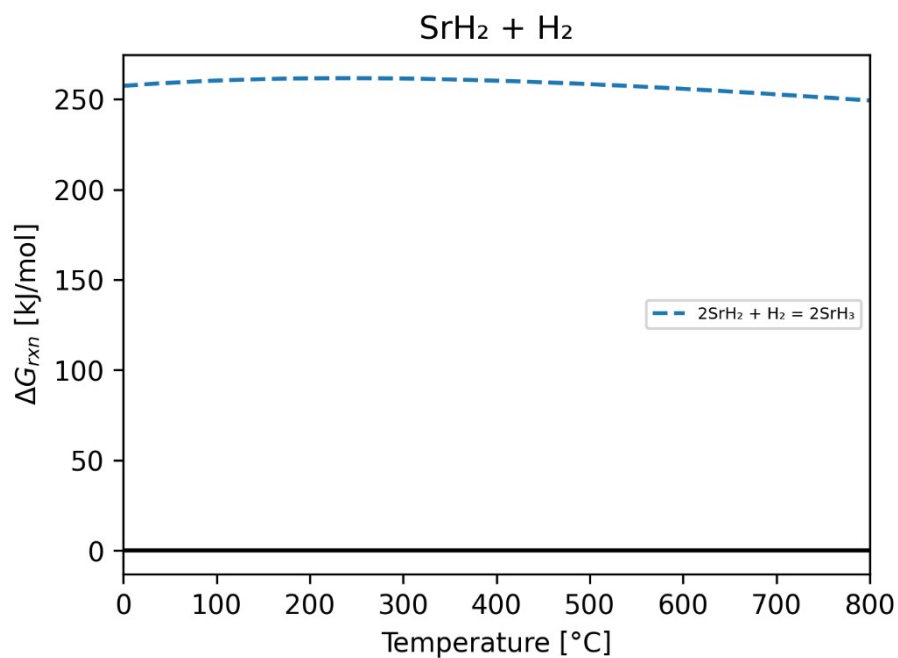

Figure S117: Ellingham diagram of the  $\text{SrH}_2$  hydrogenation step: standard Gibbs free energy change per mol  $\text{H}_2$  as a function of temperature.

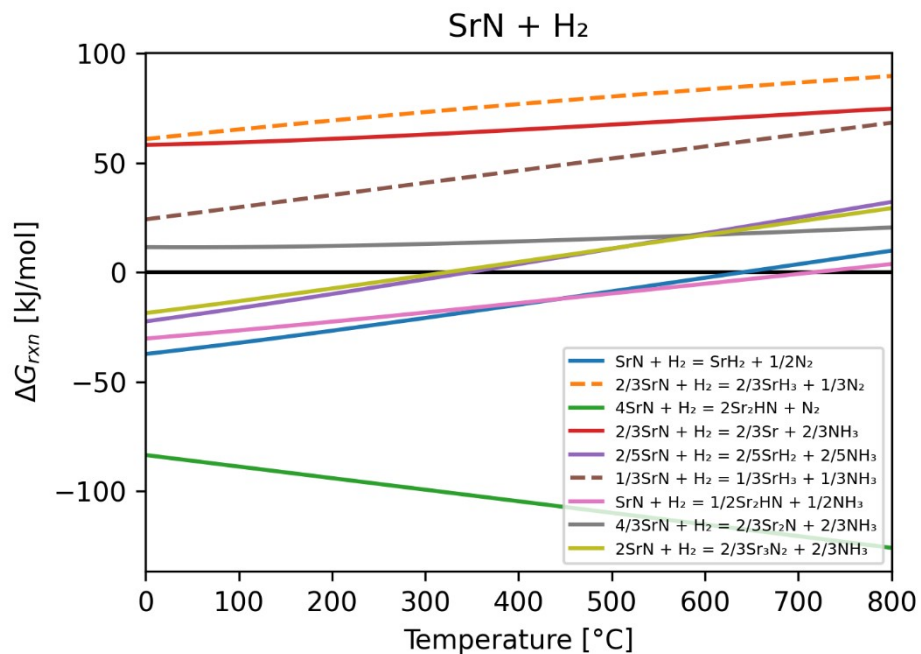

Figure S118: Ellingham diagram of the SrN hydrogenation step: standard Gibbs free energy change per mol H<sub>2</sub> as a function of temperature.

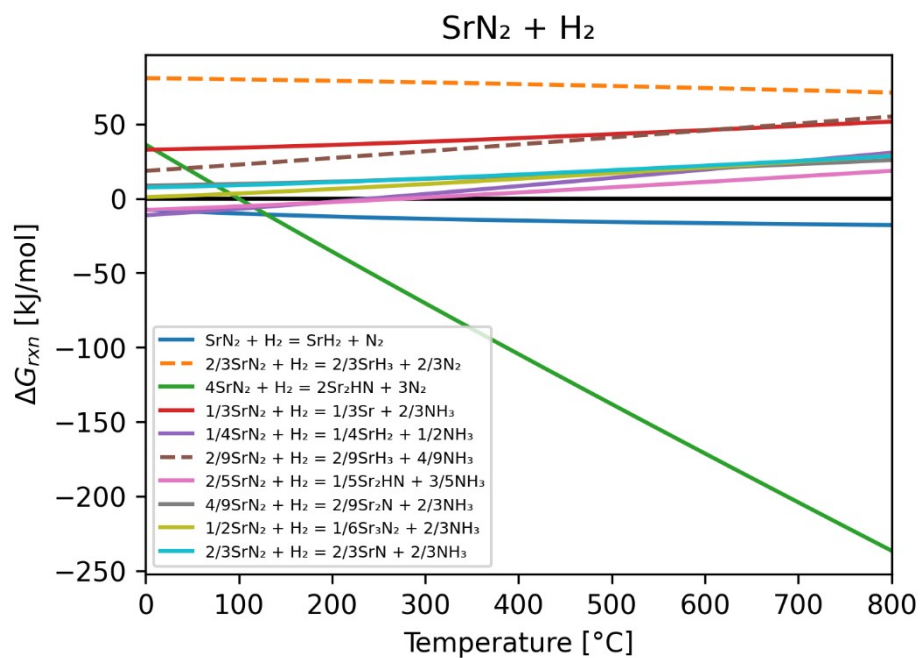

Figure S119: Ellingham diagram of the SrN<sub>2</sub> hydrogenation step: standard Gibbs free energy change per mol H<sub>2</sub> as a function of temperature.

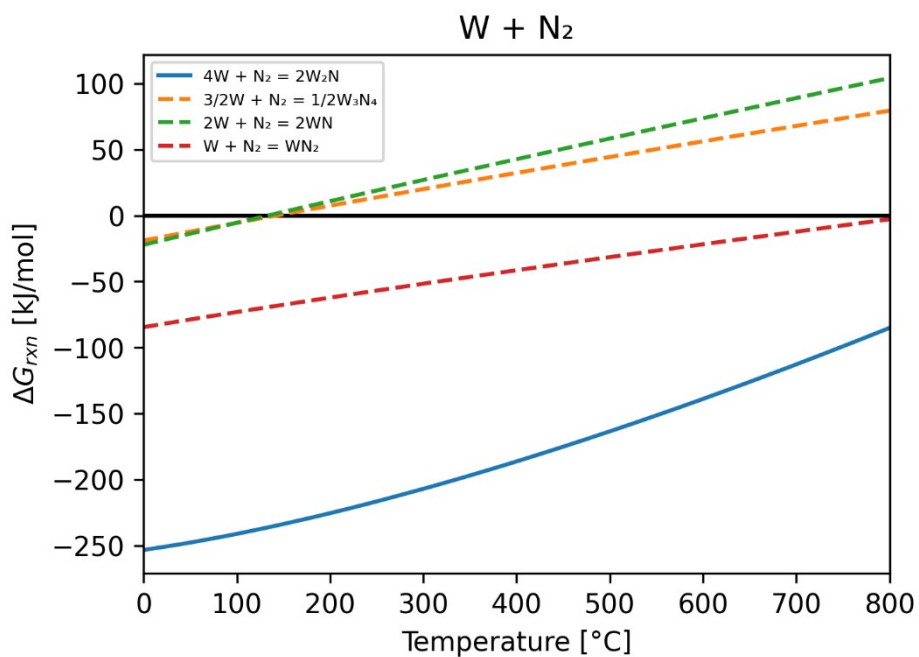

Figure S120: Ellingham diagram of the W nitridation step: standard Gibbs free energy change per mol N<sub>2</sub> as a function of temperature.

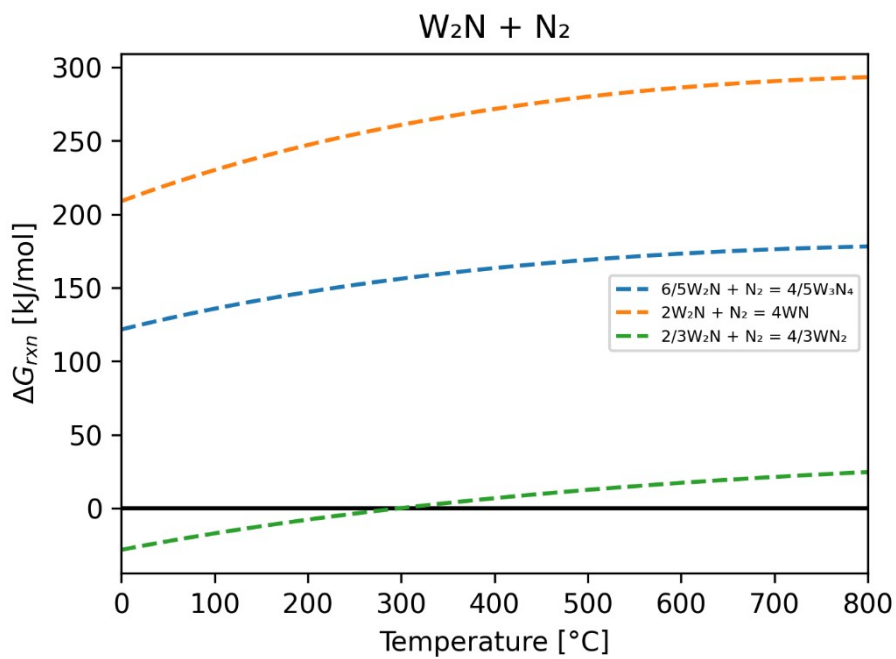

Figure S121: Ellingham diagram of the W<sub>2</sub>N nitridation step: standard Gibbs free energy change per mol N<sub>2</sub> as a function of temperature.

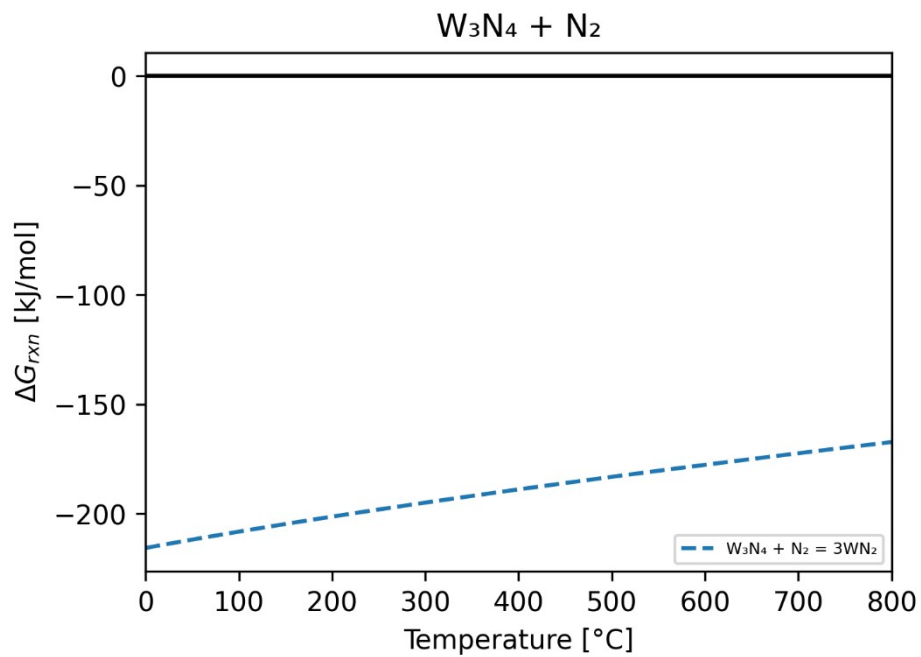

Figure S122: Ellingham diagram of the  $W_3N_4$  nitridation step: standard Gibbs free energy change per mol  $N_2$  as a function of temperature.

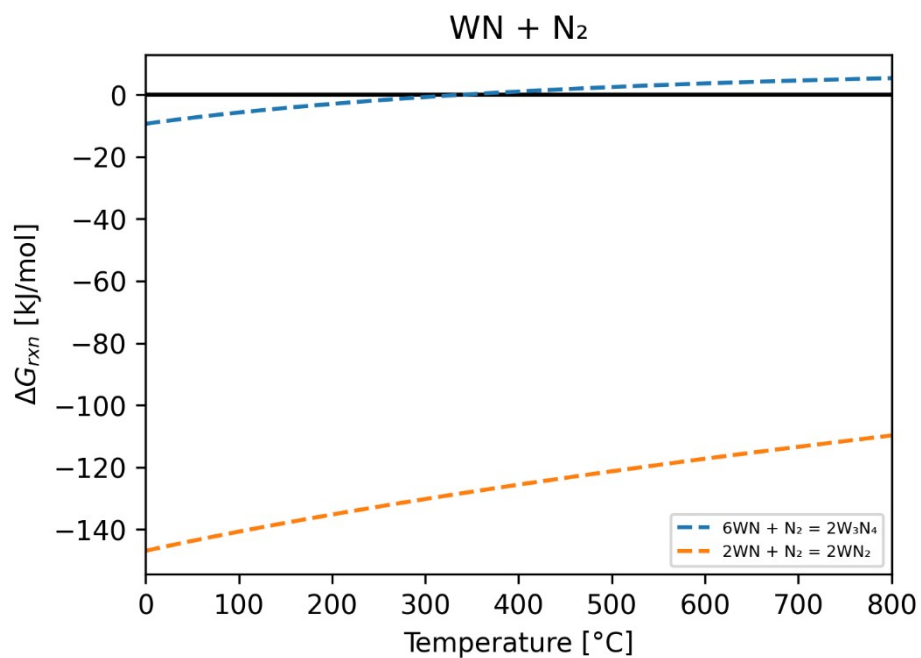

Figure S123: Ellingham diagram of the  $WN$  nitridation step: standard Gibbs free energy change per mol  $N_2$  as a function of temperature.

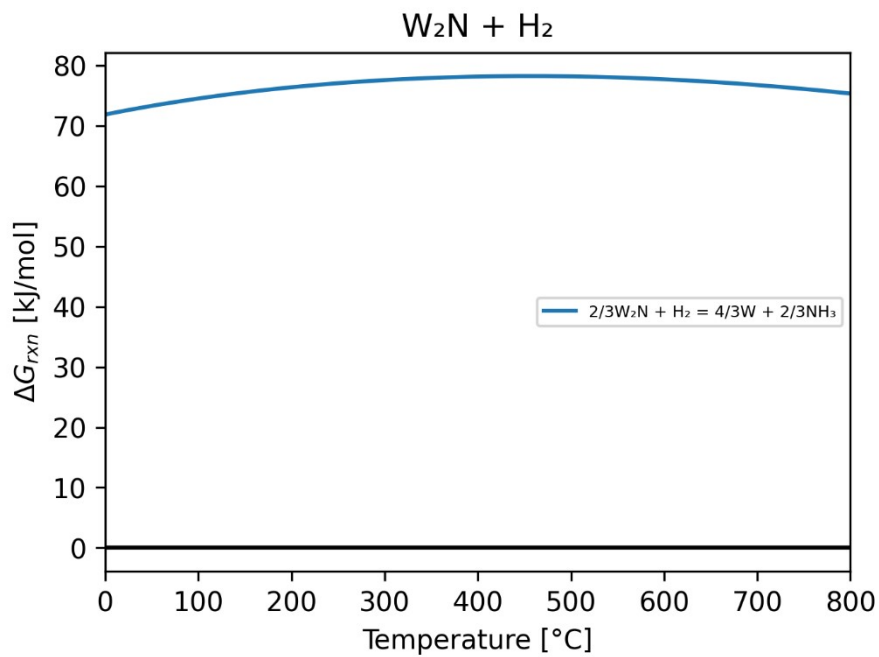

Figure S124: Ellingham diagram of the  $W_2N$  hydrogenation step: standard Gibbs free energy change per mol  $H_2$  as a function of temperature.

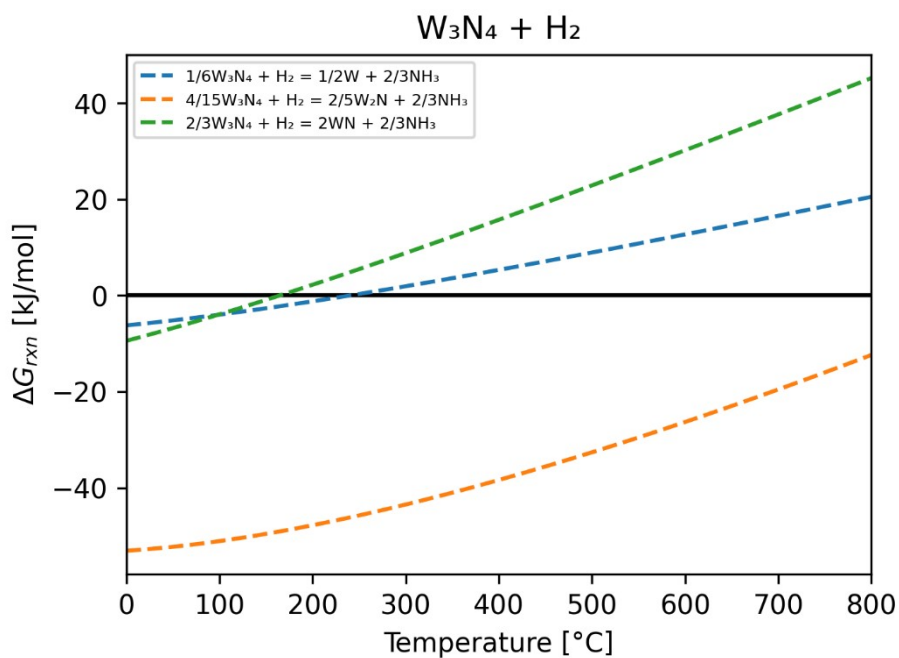

Figure S125: Ellingham diagram of the  $W_3N_4$  hydrogenation step: standard Gibbs free energy change per mol  $H_2$  as a function of temperature.

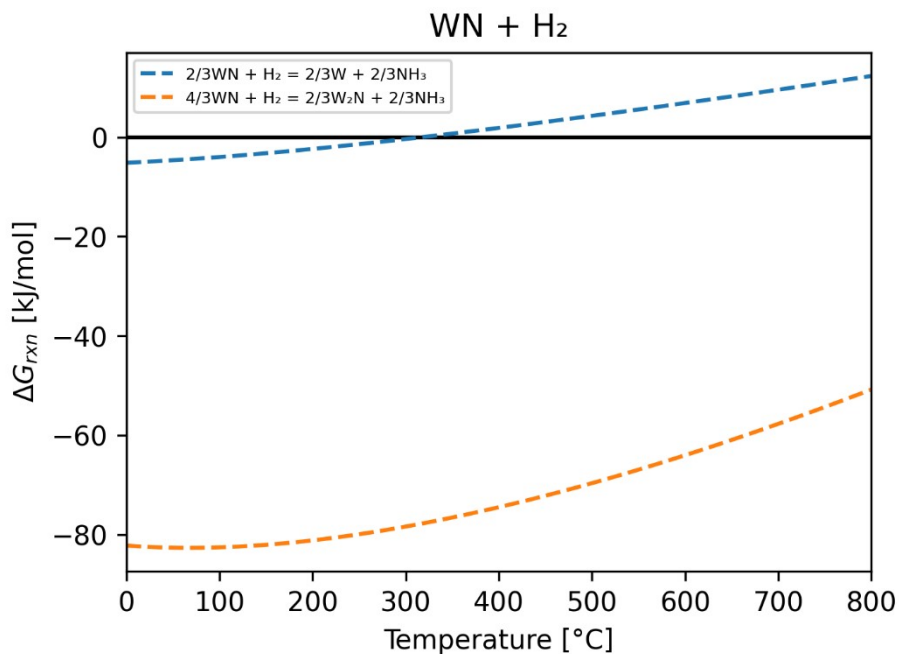

Figure S126: Ellingham diagram of the WN hydrogenation step: standard Gibbs free energy change per mol H<sub>2</sub> as a function of temperature.

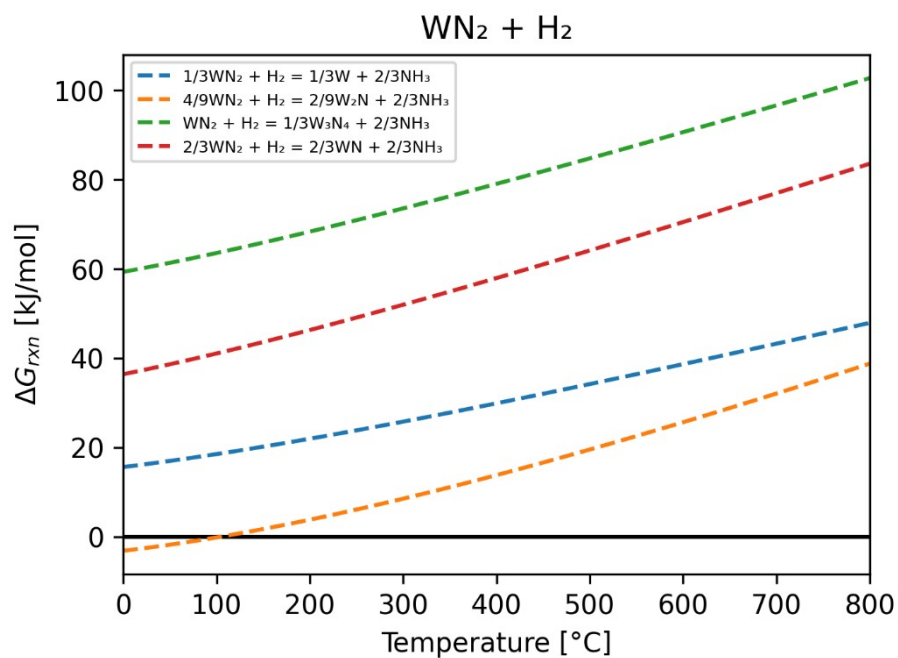

Figure S127: Ellingham diagram of the WN<sub>2</sub> hydrogenation step: standard Gibbs free energy change per mol H<sub>2</sub> as a function of temperature.

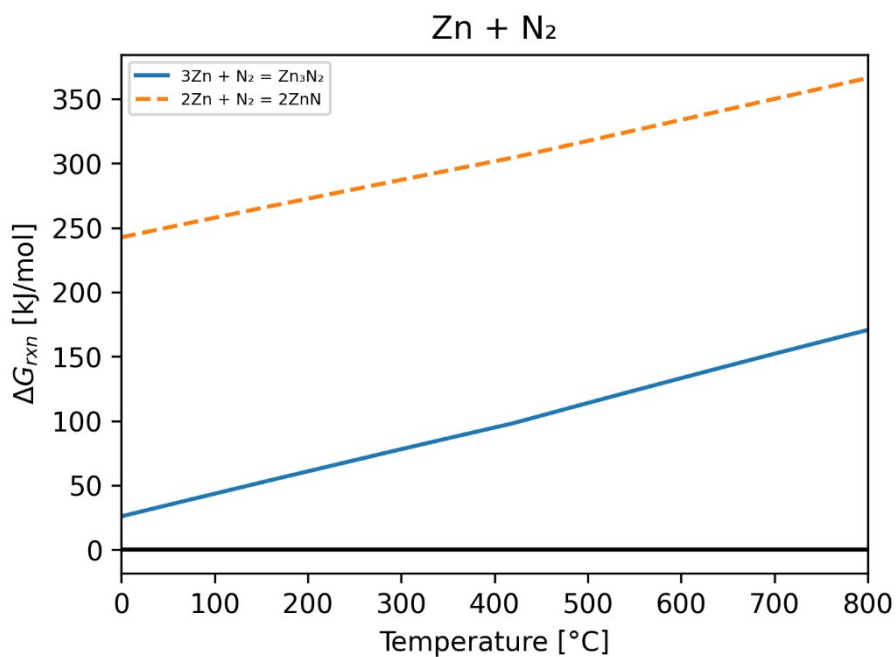

Figure S128: Ellingham diagram of the Zn nitridation step: standard Gibbs free energy change per mol N<sub>2</sub> as a function of temperature.

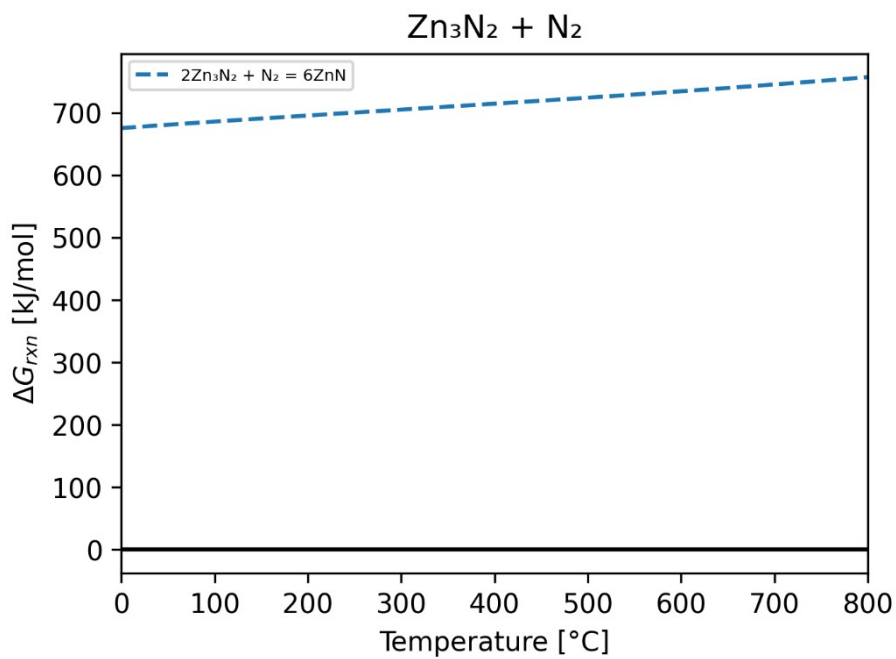

Figure S129: Ellingham diagram of the Zn<sub>3</sub>N<sub>2</sub> nitridation step: standard Gibbs free energy change per mol N<sub>2</sub> as a function of temperature.

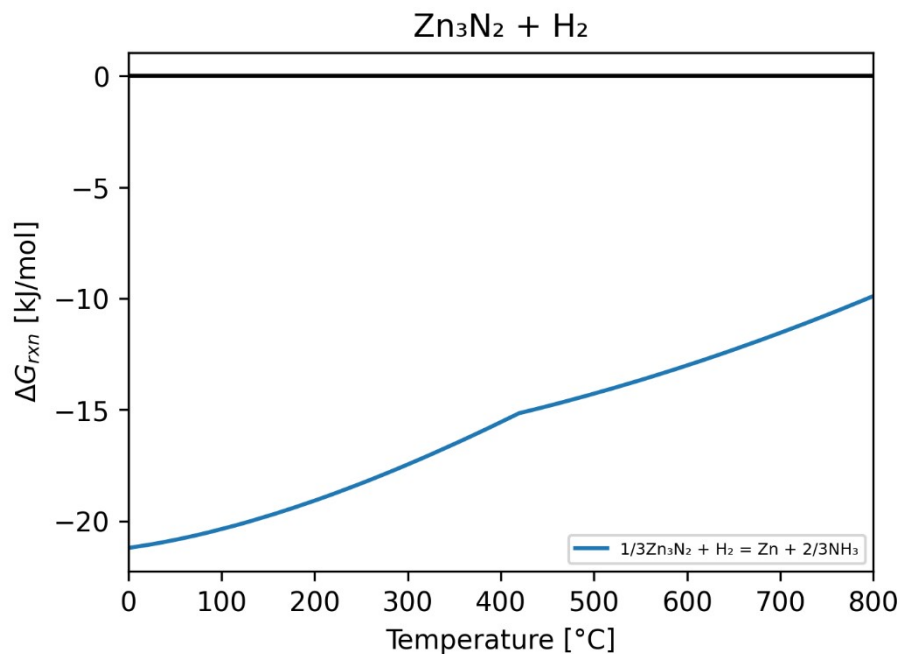

Figure S130: Ellingham diagram of the  $\text{Zn}_3\text{N}_2$  hydrogenation step: standard Gibbs free energy change per mol  $\text{H}_2$  as a function of temperature.

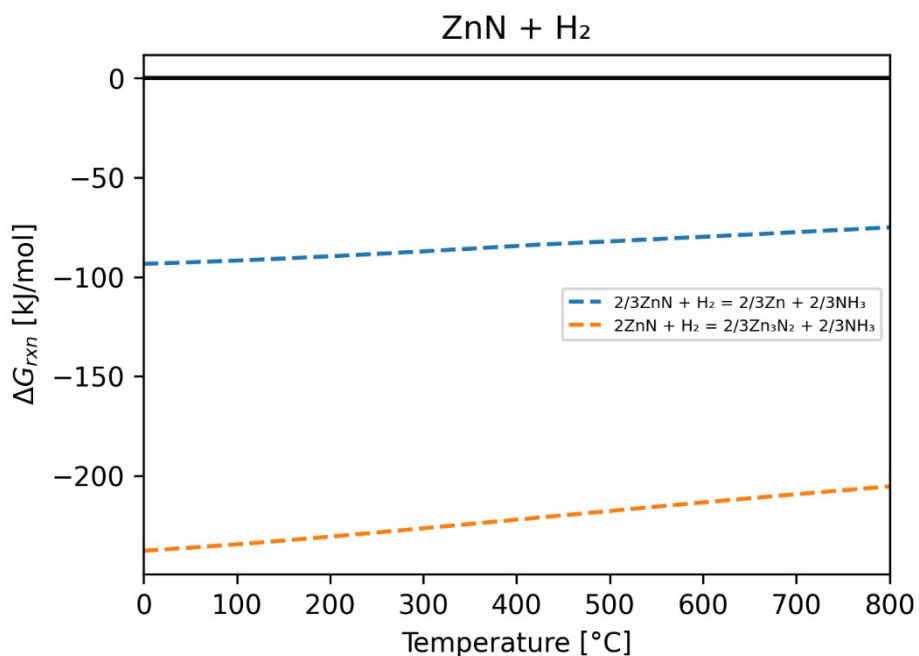

Figure S131: Ellingham diagram of the  $\text{ZnN}$  hydrogenation step: standard Gibbs free energy change per mol  $\text{H}_2$  as a function of temperature.

## 2. Experimental Screening

Experimental screening was performed by thermogravimetric runs. The plots show the variation of mass and temperature (recorded by the TGA), ion current (recorded by the mass spectrometer), and were applicable the  $\text{NH}_3$  concentration (recorded by the  $\text{NH}_3$  analyzer) as a function of time. The materials used in the experiments are shown in Table S29.



Table S29: List of materials used in TGA experiments.

| Material | Form          | Size                    | Purity [%] | Supplier                  |
|----------|---------------|-------------------------|------------|---------------------------|
| Sr       | Random pieces | Flakes in mm-range size | 99         | Sigma-Aldrich (Merck)     |
| Sr       | Granules      | mm-range size           | 99         | Sigma-Aldrich (Merck)     |
| Mn       | Powder        | -325 mesh               | 99.3       | Alfa Aesar                |
| Ca       | Granules      | -16 mesh                | 99.5       | Alfa Aesar                |
| Cr       | Powder        | APS <10 micron          | 99.2       | Alfa Aesar                |
| Cu       | Powder        | -625 mesh               | 99         | Alfa Aesar                |
| W        | Powder        | APS 1-5 micron          | 99.9       | Alfa Aesar                |
| Ni       | Powder        | APS 3-7 micron          | 99.9       | Alfa Aesar                |
| Mo       | Powder        | APS 2-4 micron          | 99.9       | Alfa Aesar                |
| Fe       | Powder        | APS <10 micron          | 99.9+      | Alfa Aesar                |
| Zn       | Powder        | Average 4-7 micron      | 97.5       | Alfa Aesar                |
| Co       | Powder        | APS 1.6 micron          | 99.8       | Alfa Aesar                |
| Al       | Powder        | APS 3 micron            | 99.9       | Nanografi Nano Technology |
| Li       | Granules      | 4-10 mesh               | 99         | Sigma-Aldrich (Merck)     |

*The Al-based system*

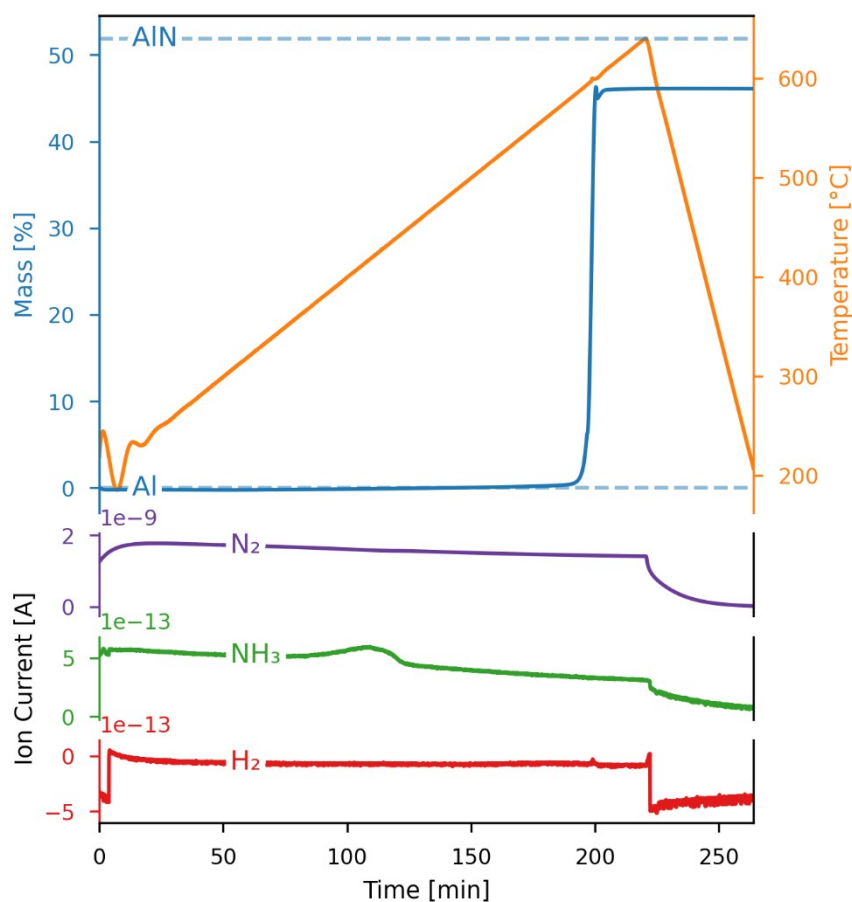

Figure S132: Variations of mass and temperature (recorded by the TGA) and ion current (recorded by the mass spectrometer) as a function of time for the Al-nitridation under 100% N<sub>2</sub>. Blue dashed lines: theoretical mass changes for no conversion (0%) and full conversion to AlN (51.91%). The ion current signals correspond to N<sub>2</sub> (purple), NH<sub>3</sub> (green), and H<sub>2</sub> (red). Sample was heated from 200-640°C at a rate of 2°C/min in 100% N<sub>2</sub> and cooled down back to 200°C in 100% Ar. Al reacted to AlN, in agreement with the Ellingham diagram (

Table S1).

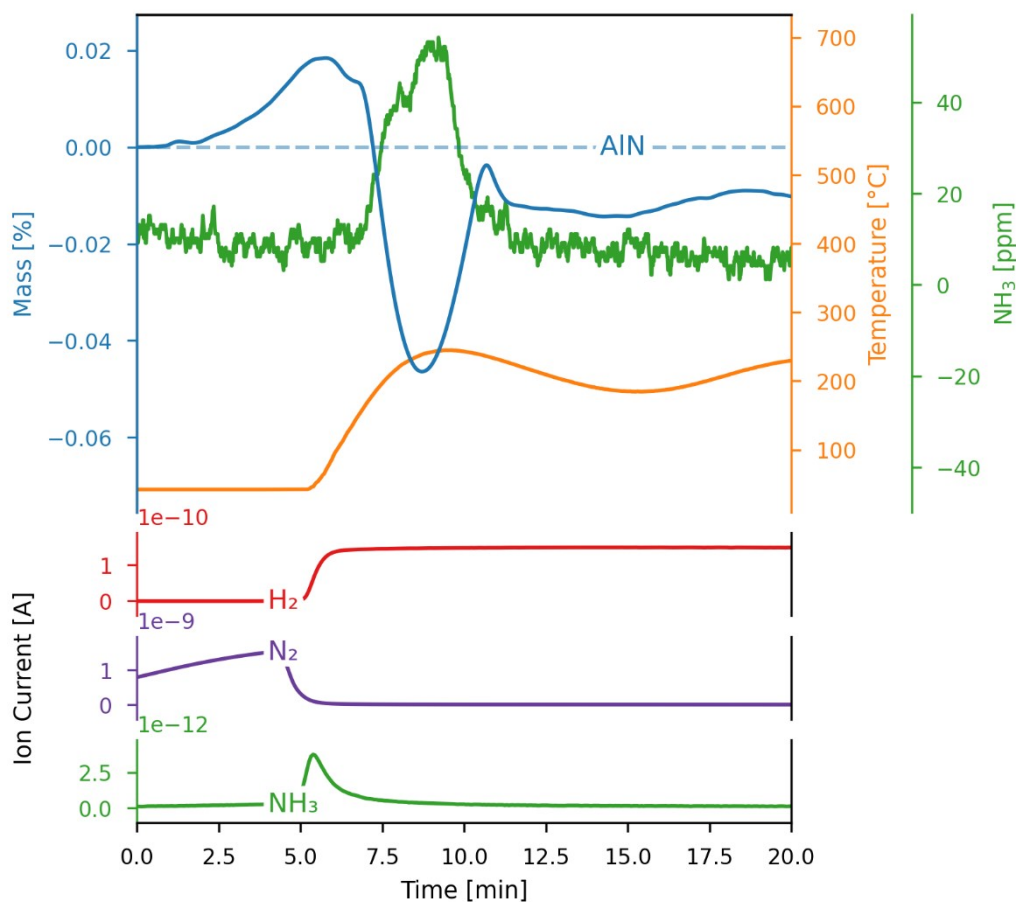

Figure S133: Variations of mass and temperature (recorded by the TGA), ion current (recorded by the mass spectrometer), and  $\text{NH}_3$  concentration (recorded by the  $\text{NH}_3$  analyzer) as a function of time for the AlN-hydrogenation under 5%  $\text{H}_2$  in Ar. Blue dashed line: theoretical mass changes for no conversion (0%). The ion current signals correspond to  $\text{N}_2$  (purple),  $\text{NH}_3$  (green), and  $\text{H}_2$  (red). Sample was heated from 200-700°C at a rate of 2°C/min in 5%  $\text{H}_2$  in Ar (shown is a cropped version of the run to focus on the part with  $\text{NH}_3$  production). Upon switching from a 100%  $\text{N}_2$  flow to the 5%  $\text{H}_2$  flow at around 10 minutes, the  $\text{NH}_3$  analyzer registers a peak of  $\text{NH}_3$  (approximately 40 ppm in the unfiltered signal).

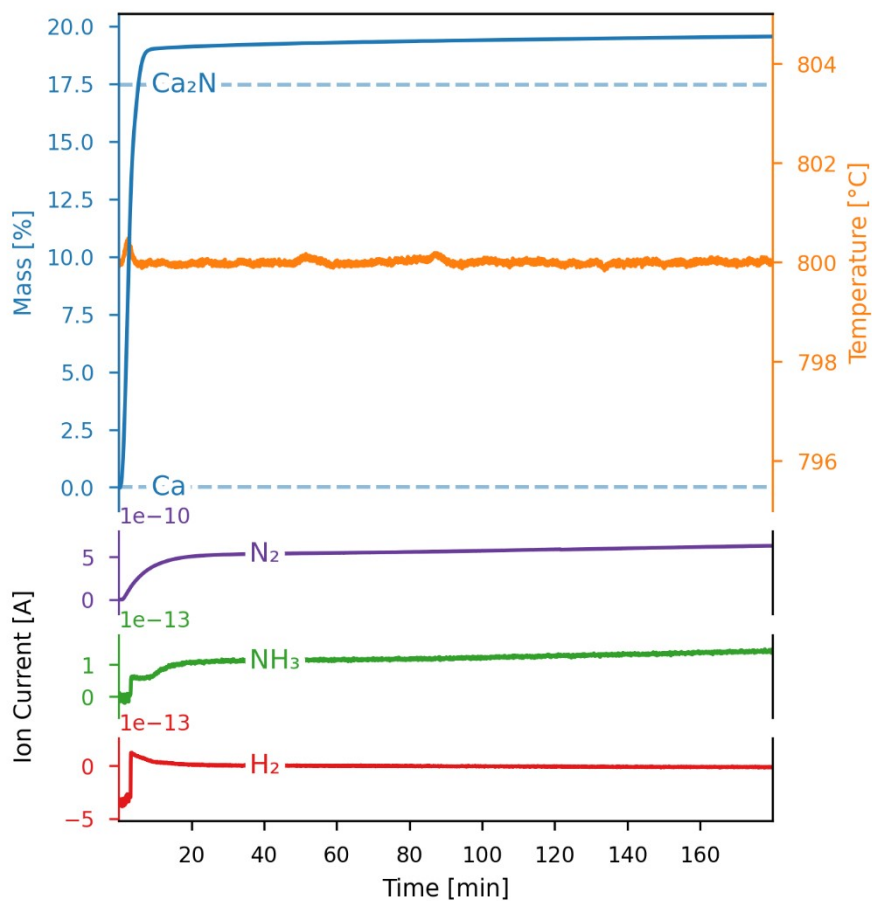

Figure S134: Variations of mass and temperature (recorded by the TGA) and ion current (recorded by the mass spectrometer) as a function of time for the Ca-nitridation under 100% N<sub>2</sub>. Blue dashed lines: theoretical mass changes for no conversion (0%) and full conversion to Ca<sub>2</sub>N (17.47%). The ion current signals correspond to N<sub>2</sub> (purple), NH<sub>3</sub> (green), and H<sub>2</sub> (red). Sample was heated to 800°C in Ar, then switched to 100% N<sub>2</sub>. Ca reacted to Ca<sub>2</sub>N, in agreement with the Ellingham diagram (Figure S6).

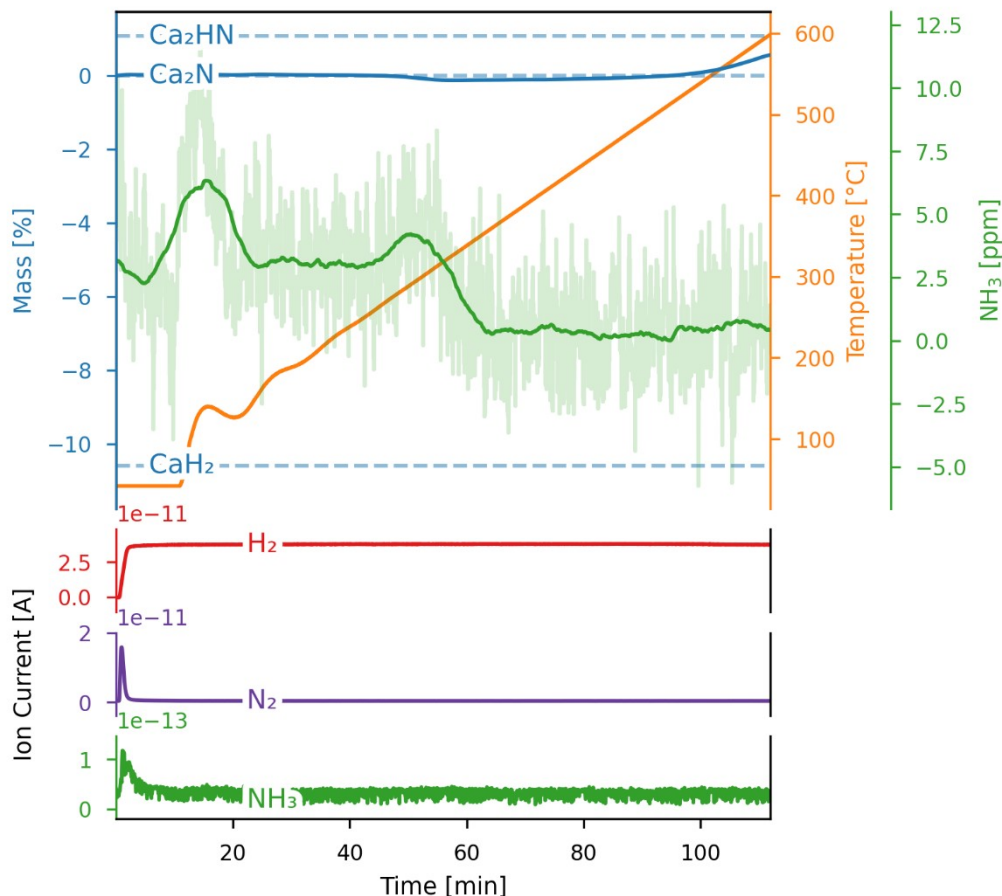

Figure S135: Variations of mass and temperature (recorded by the TGA), ion current (recorded by the mass spectrometer), and  $\text{NH}_3$  concentration (recorded by the  $\text{NH}_3$  analyzer) as a function of time for the  $\text{Ca}_2\text{N}$ -hydrogenation under 5%  $\text{H}_2$  in Ar. Blue dashed line: theoretical mass changes for no conversion (0%), full conversion to  $\text{CaH}_2$  (-10.59%), and full conversion to  $\text{Ca}_2\text{HN}$  (1.67%). The ion current signals correspond to  $\text{N}_2$  (purple),  $\text{NH}_3$  (green), and  $\text{H}_2$  (red). Two peaks of  $\text{NH}_3$  are visible in the filtered  $\text{NH}_3$  signal, albeit very small (same order magnitude as the noise). The first peak is not accompanied by a change in the mass signal. The second peak, shortly before 300 $^{\circ}\text{C}$ , is accompanied by a minor decrease in mass. According to the Ellingham diagram in Figure S12, the formation of  $\text{CaH}_2$  with either  $\text{N}_2$  or  $\text{NH}_3$  from the hydrogenation of  $\text{Ca}_2\text{N}$  is spontaneous up to approximately that temperature.

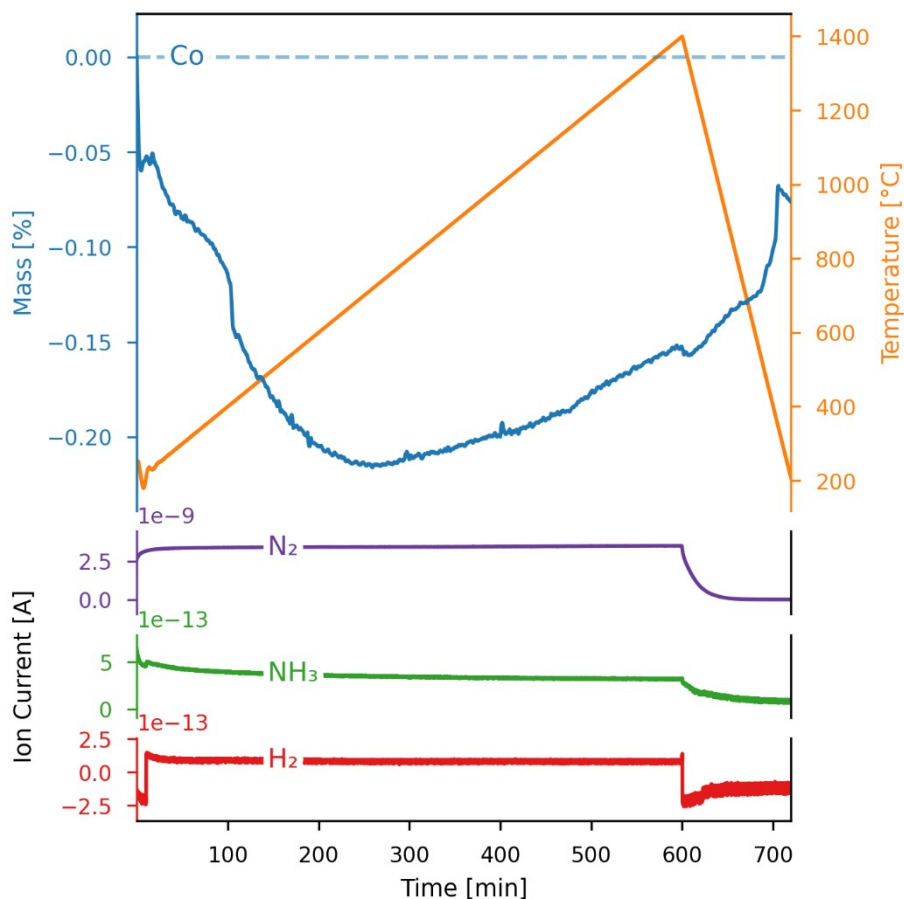

Figure S136: Variations of mass and temperature (recorded by the TGA) and ion current (recorded by the mass spectrometer) as a function of time for the Co-nitridation under 100% N<sub>2</sub>. Blue dashed lines: theoretical mass changes for no conversion (0%). The ion current signals correspond to N<sub>2</sub> (purple), NH<sub>3</sub> (green), and H<sub>2</sub> (red). Sample was heated from 200-1400°C at a rate of 2°C/min in 100% N<sub>2</sub> and cooled down back to 200°C in 100% Ar. No significant reaction was measurable, in agreement with the Ellingham diagram (Figure S16).

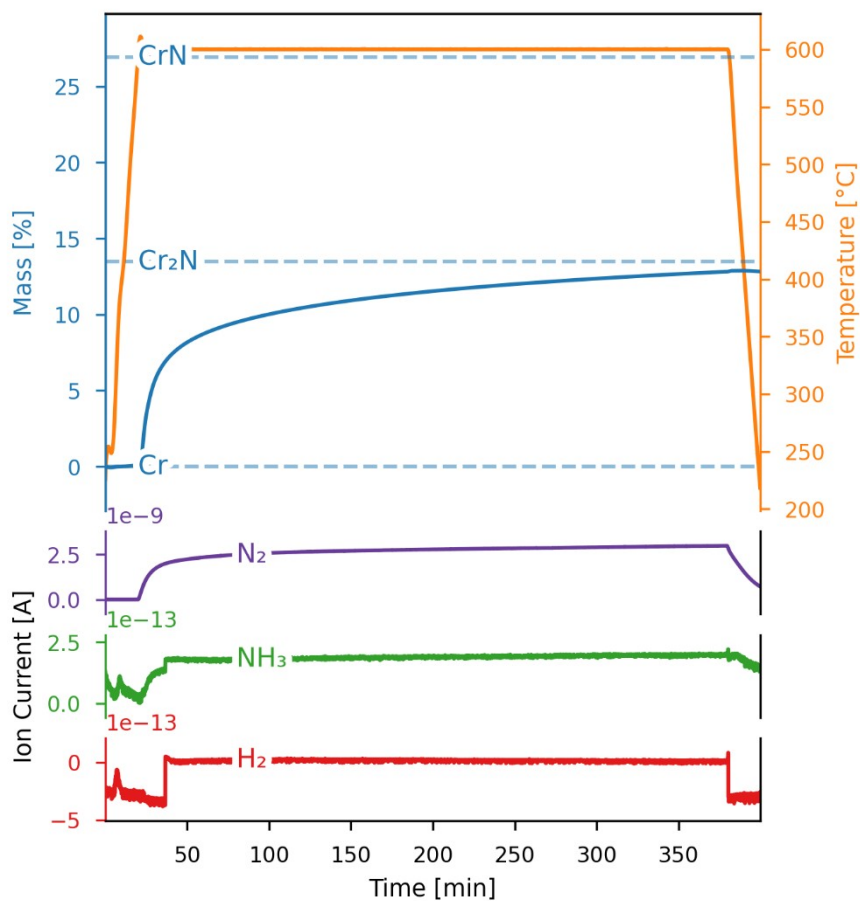

Figure S137: Variations of mass and temperature (recorded by the TGA) and ion current (recorded by the mass spectrometer) as a function of time for the Cr-nitridation under 100% N<sub>2</sub>. Blue dashed lines: theoretical mass changes for no conversion (0%), full conversion to Cr<sub>2</sub>N (13.47%), and full conversion to CrN (26.94%). The ion current signals correspond to N<sub>2</sub> (purple), NH<sub>3</sub> (green), and H<sub>2</sub> (red). Sample was heated to 600°C in Ar, then switch to 100% N<sub>2</sub>. Cr reacted to Cr<sub>2</sub>N, in agreement with the Ellingham diagram (Figure S24).

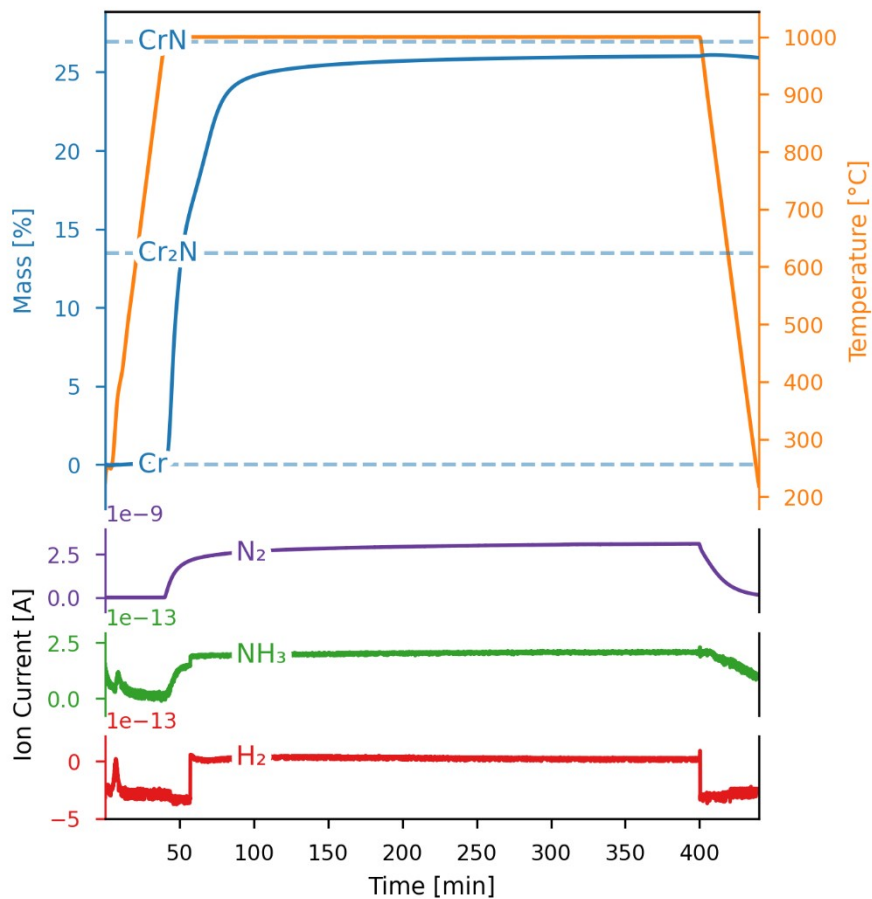

Figure S138: Variations of mass and temperature (recorded by the TGA) and ion current (recorded by the mass spectrometer) as a function of time for the Cr-nitridation under 100% N<sub>2</sub>. Blue dashed lines: theoretical mass changes for no conversion (0%), full conversion to Cr<sub>2</sub>N (13.47%), and full conversion to CrN (26.94%). The ion current signals correspond to N<sub>2</sub> (purple), NH<sub>3</sub> (green), and H<sub>2</sub> (red). Sample was heated to 600°C in Ar, then switch to 100% N<sub>2</sub>. Cr reacted to CrN. According to the Ellingham diagram (Figure S24), the formation of Cr<sub>2</sub>N should be more favourable in this temperature range.

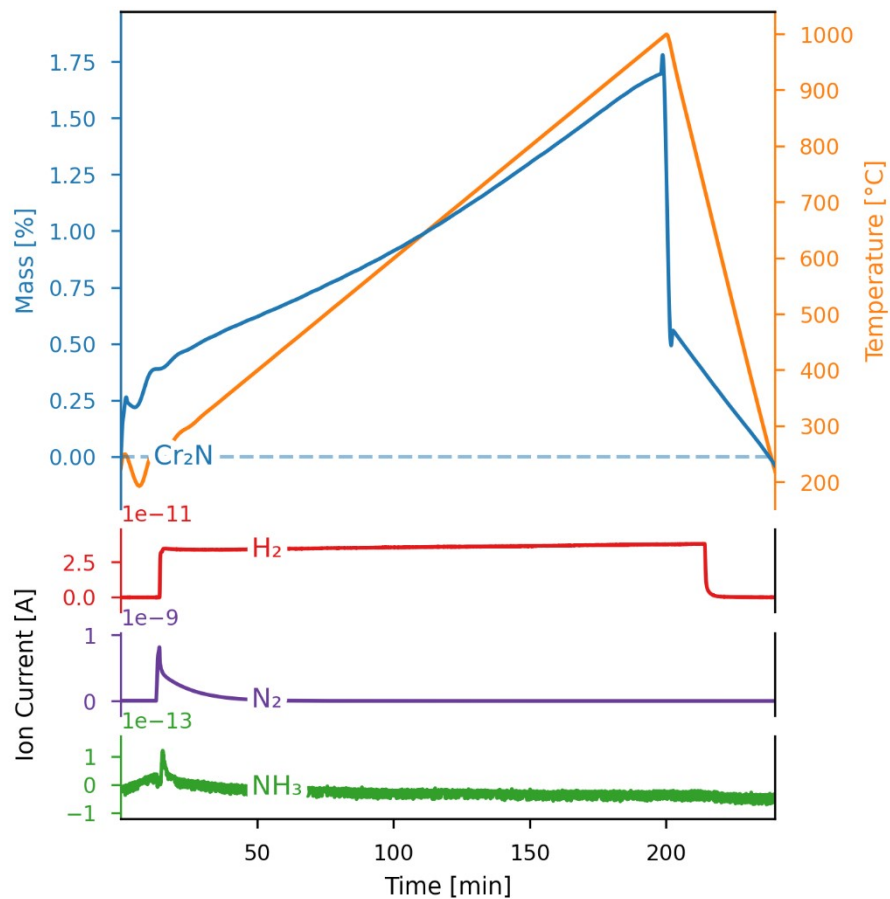

Figure 139: Variations of mass and temperature (recorded by the TGA) and ion current (recorded by the mass spectrometer) as a function of time for the  $\text{Cr}_2\text{N}$ -hydrogenation under 5%  $\text{H}_2$  in Ar. Blue dashed lines: theoretical mass changes for no conversion (0%). The ion current signals correspond to  $\text{N}_2$  (purple),  $\text{NH}_3$  (green), and  $\text{H}_2$  (red). Sample was heated from 200-1000°C at a rate of 4°C/min in 5%  $\text{H}_2$  in Ar and cooled down back to 200°C in 100% Ar. No significant reaction was measurable, in agreement with the Ellingham diagram (Figure S31).



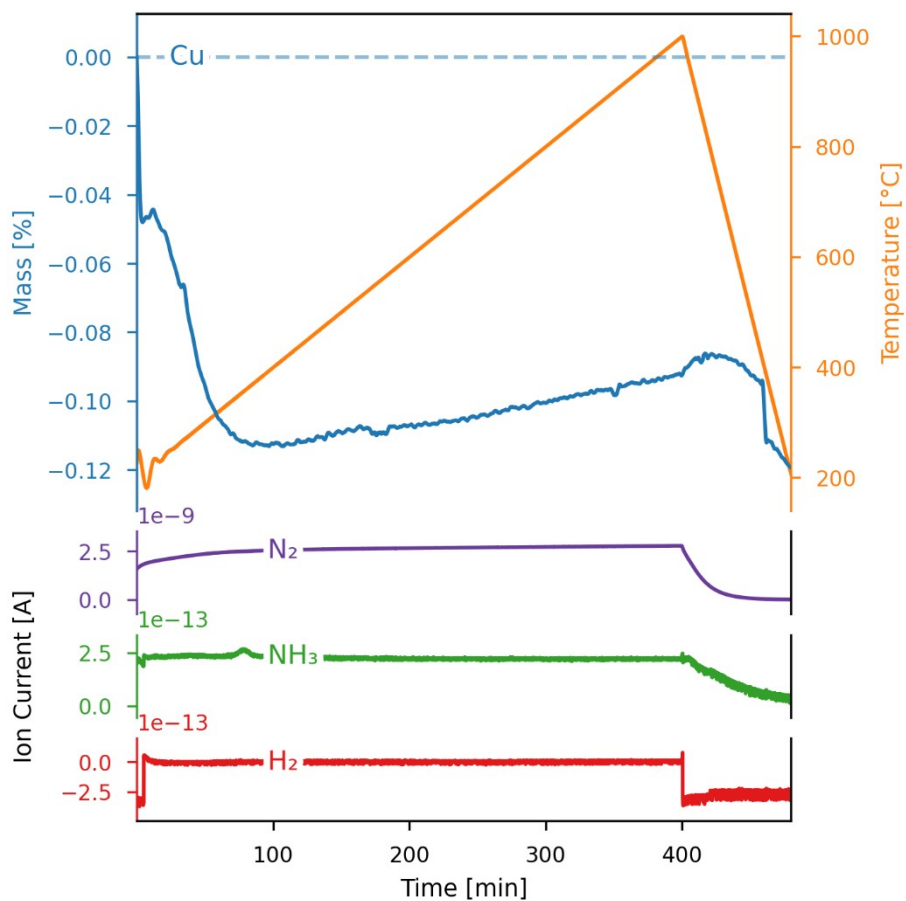

Figure S140: Variations of mass and temperature (recorded by the TGA) and ion current (recorded by the mass spectrometer) as a function of time for the Cu-nitridation under 100% N<sub>2</sub>. Blue dashed lines: theoretical mass changes for no conversion (0%). The ion current signals correspond to N<sub>2</sub> (purple), NH<sub>3</sub> (green), and H<sub>2</sub> (red). Sample was heated from 200-1000°C at a rate of 2°C/min in 100% N<sub>2</sub> and cooled down back to 200°C in 100% Ar. No significant reaction was measurable, in agreement with the Ellingham diagram (Figure S36).

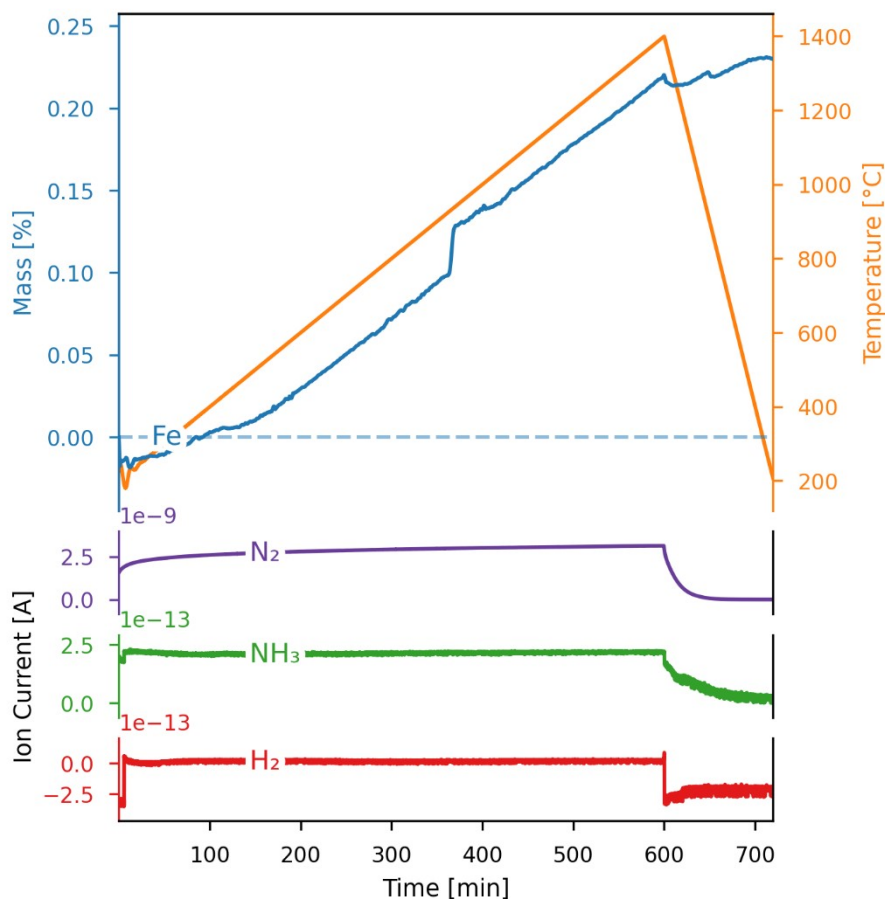

Figure S141: Variations of mass and temperature (recorded by the TGA) and ion current (recorded by the mass spectrometer) as a function of time for the Fe-nitridation under 100% N<sub>2</sub>. Blue dashed lines: theoretical mass changes for no conversion (0%). The ion current signals correspond to N<sub>2</sub> (purple), NH<sub>3</sub> (green), and H<sub>2</sub> (red). Sample was heated from 200-1400°C at a rate of 2°C/min in 100% N<sub>2</sub> and cooled down back to 200°C in 100% Ar. No significant reaction was measurable. According to the Ellingham diagram (Figure S46), the formation of Fe<sub>3</sub>N and FeN should be favourable up to 220°C and 450°C, respectively.

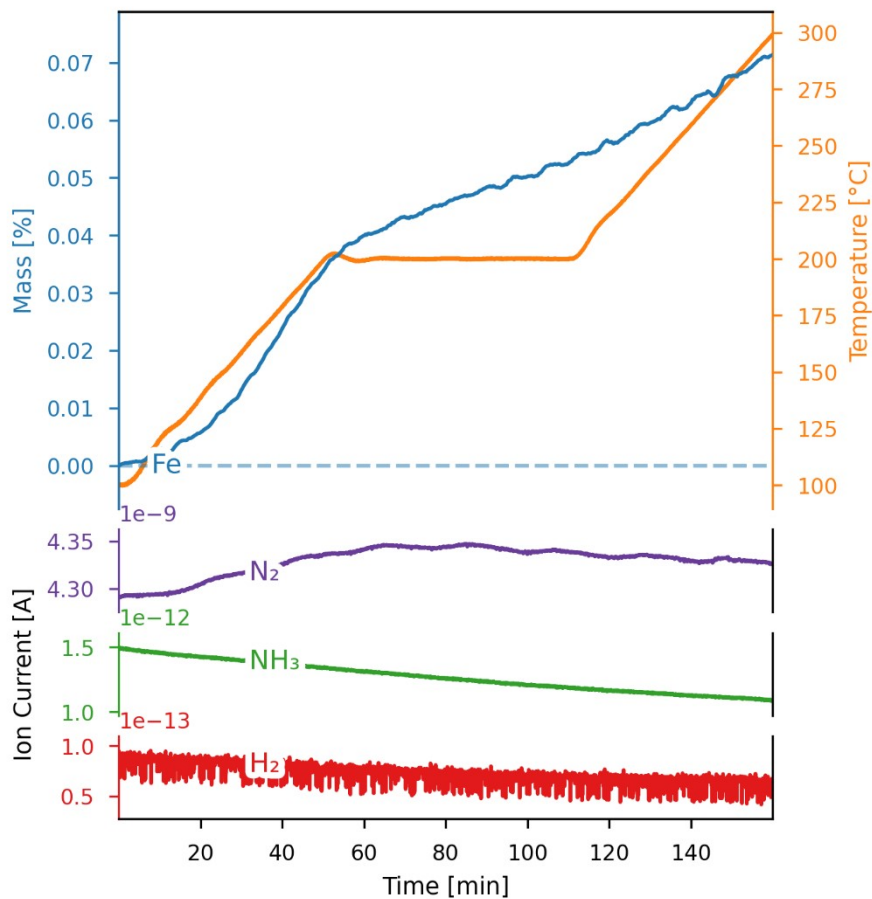

Figure S142: Variations of mass and temperature (recorded by the TGA) and ion current (recorded by the mass spectrometer) as a function of time for the Fe-nitridation under 100% N<sub>2</sub>. Blue dashed lines: theoretical mass changes for no conversion (0%). The ion current signals correspond to N<sub>2</sub> (purple), NH<sub>3</sub> (green), and H<sub>2</sub> (red). Sample was heated from 100-300°C at a rate of 2°C/min in 100% N<sub>2</sub> with an isothermal section of 60 min at 200°C in between. No significant reaction was measurable. According to the Ellingham diagram (Figure S46), the formation of Fe<sub>3</sub>N and FeN should be favourable up to 220°C and 450°C, respectively.

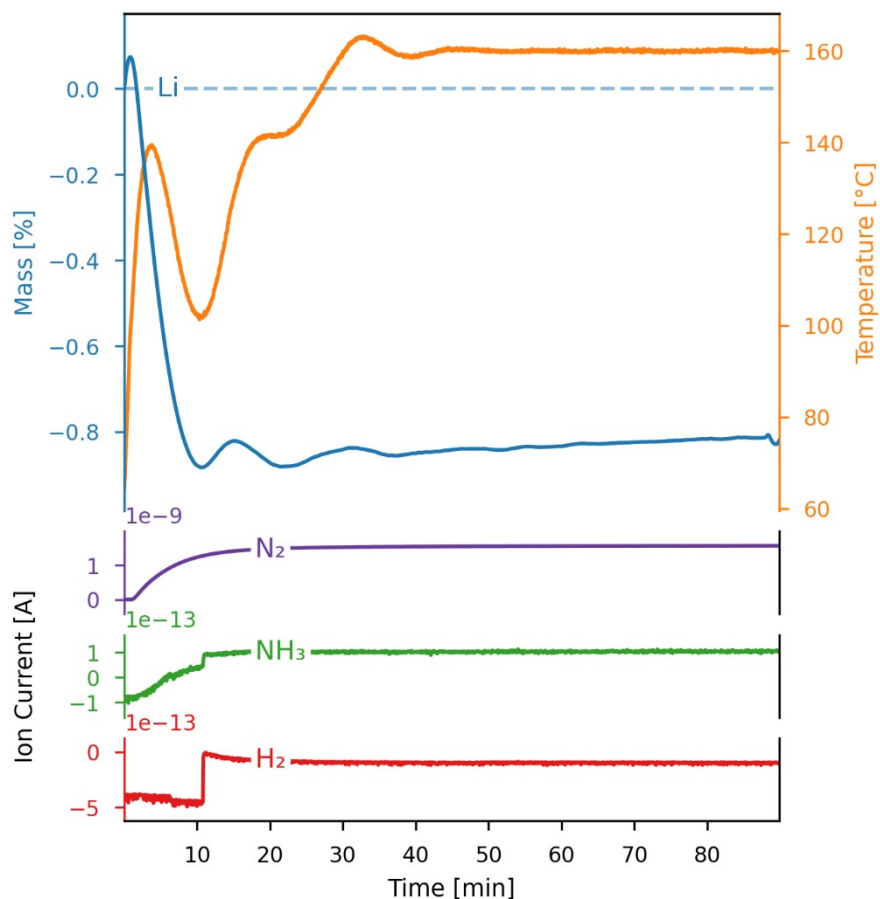

Figure S143: Variations of mass and temperature (recorded by the TGA) and ion current (recorded by the mass spectrometer) as a function of time for the Li-nitridation under 100% N<sub>2</sub>. Blue dashed lines: theoretical mass changes for no conversion (0%). The ion current signals correspond to N<sub>2</sub> (purple), NH<sub>3</sub> (green), and H<sub>2</sub> (red). Sample was heated to 160°C in Ar, then switched to 100% N<sub>2</sub>. No significant reaction was measurable. According to the Ellingham diagram (Figure S62), the formation of Li<sub>3</sub>N should be favourable at that temperature. The low temperature seems to prevent the reaction from proceeding. Due to the Li melting point of 180.5°C at 1 bar, higher temperatures are not feasible.

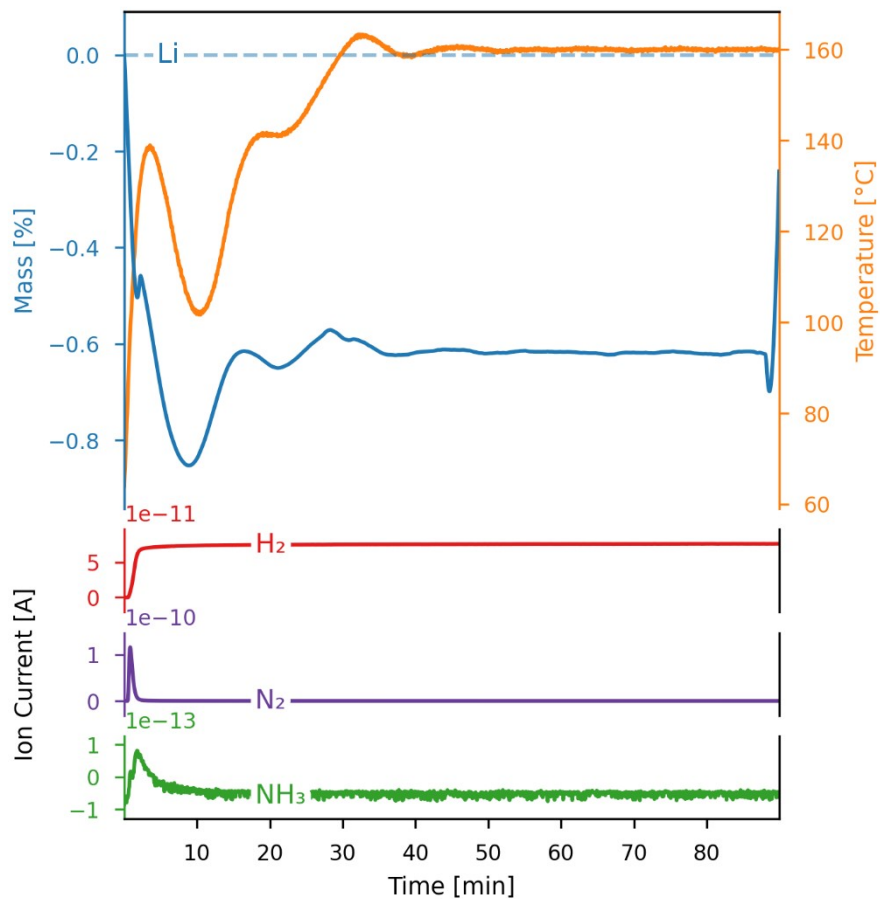

Figure S144: Variations of mass and temperature (recorded by the TGA) and ion current (recorded by the mass spectrometer) as a function of time for the Li-hydrogenation under 5% H<sub>2</sub> in Ar. Blue dashed lines: theoretical mass changes for no conversion (0%). The ion current signals correspond to N<sub>2</sub> (purple), NH<sub>3</sub> (green), and H<sub>2</sub> (red). Sample was heated to 160°C in Ar, then switched to 5% H<sub>2</sub> in Ar. No significant reaction was measurable. According to the Ellingham diagram (Figure S66), the formation of LiH should be favourable at that temperature. The low temperature seems to prevent the reaction from proceeding. Due to the Li melting point of 180.5°C at 1 bar, higher temperatures are not feasible.

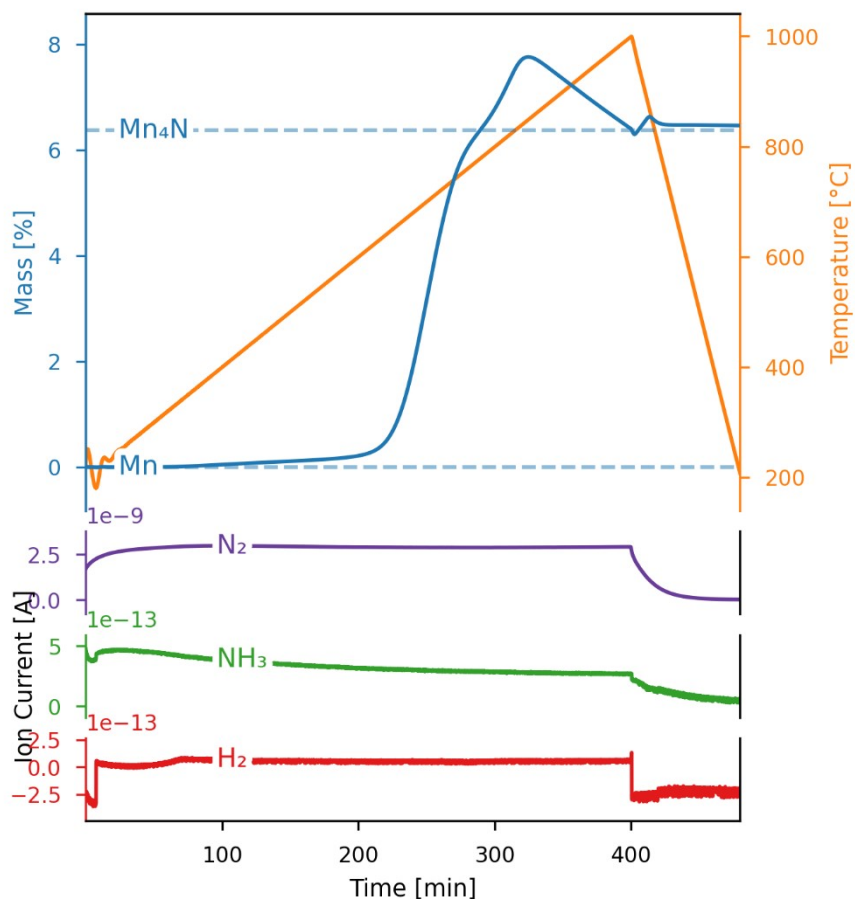

Figure S145: Variations of mass and temperature (recorded by the TGA) and ion current (recorded by the mass spectrometer) as a function of time for the Mn-nitridation under 100% N<sub>2</sub>. Blue dashed lines: theoretical mass changes for no conversion (0%) and full conversion to Mn<sub>4</sub>N (6.37%). The ion current signals correspond to N<sub>2</sub> (purple), NH<sub>3</sub> (green), and H<sub>2</sub> (red). Sample was heated from 200-1000°C at a rate of 2°C/min in 100% N<sub>2</sub> and cooled down back to 200°C in 100% Ar. Mn reacted to Mn<sub>4</sub>N, in agreement with the Ellingham diagram (Figure S70).

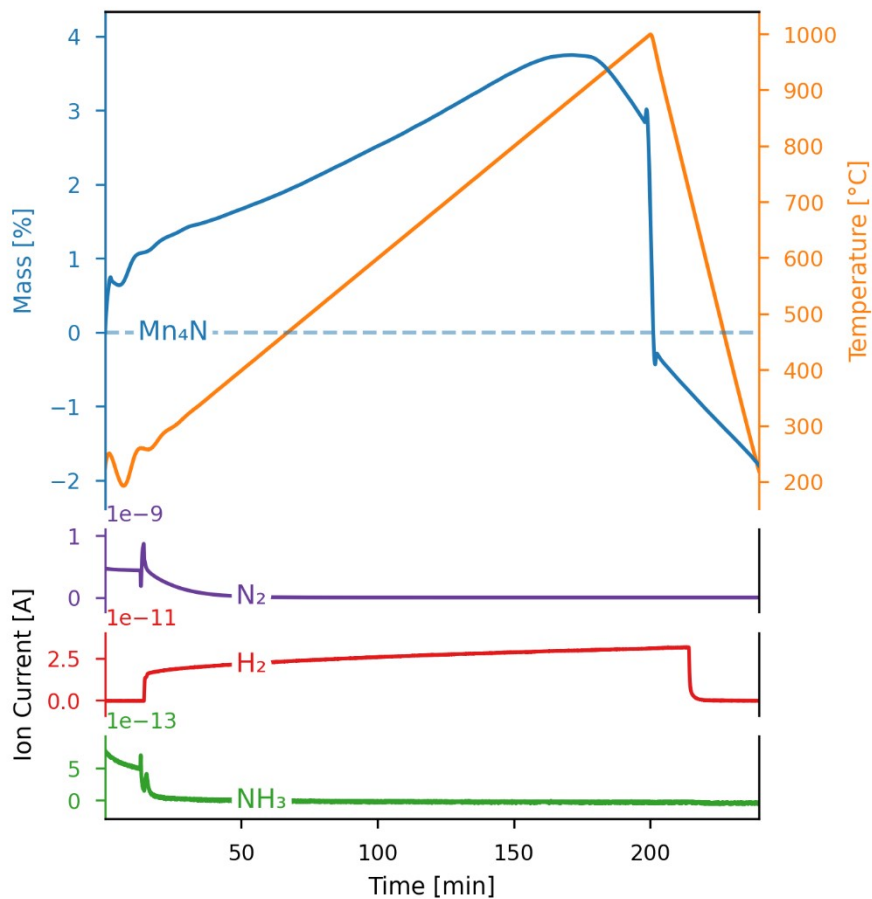

Figure S146: Variations of mass and temperature (recorded by the TGA) and ion current (recorded by the mass spectrometer) as a function of time for the  $\text{Mn}_4\text{N}$ -hydrogenation under 5%  $\text{H}_2$  in Ar. Blue dashed lines: theoretical mass changes for no conversion (0%). The ion current signals correspond to  $\text{N}_2$  (purple),  $\text{NH}_3$  (green), and  $\text{H}_2$  (red). Sample was heated from 200-1000°C at a rate of 4°C/min in 5%  $\text{H}_2$  in Ar and cooled down back to 200°C in 100% Ar. A mass increase was measurable up until 900°C, above that the mass decreases. The Ellingham diagram (Figure S77) and none of the reactions (Table S21) can help explain this behaviour.

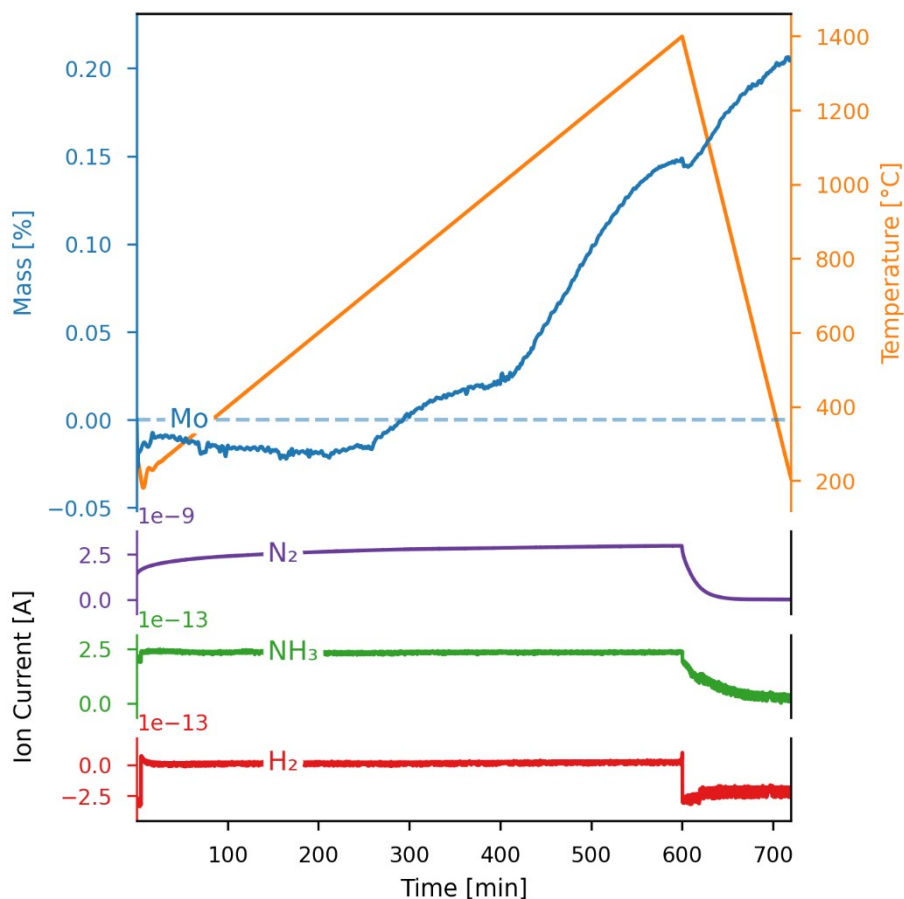

Figure S147: Variations of mass and temperature (recorded by the TGA) and ion current (recorded by the mass spectrometer) as a function of time for the Mo-nitridation under 100% N<sub>2</sub>. Blue dashed lines: theoretical mass changes for no conversion (0%). The ion current signals correspond to N<sub>2</sub> (purple), NH<sub>3</sub> (green), and H<sub>2</sub> (red). Sample was heated from 200-1400°C at a rate of 2°C/min in 100% N<sub>2</sub> and cooled down back to 200°C in 100% Ar. No significant reaction was measurable. According to the Ellingham diagram (Figure S80), the formation of Mo<sub>2</sub>N should be favourable below 680°C.



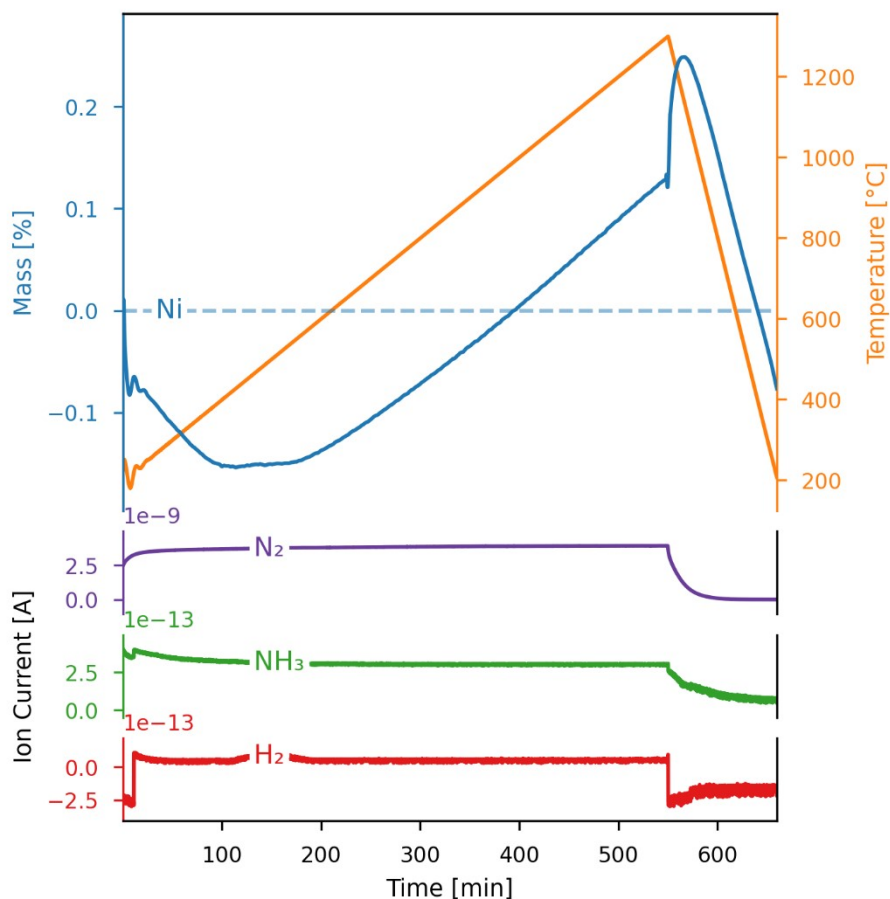

Figure S148: Variations of mass and temperature (recorded by the TGA) and ion current (recorded by the mass spectrometer) as a function of time for the Ni-nitridation under 100% N<sub>2</sub>. Blue dashed lines: theoretical mass changes for no conversion (0%). The ion current signals correspond to N<sub>2</sub> (purple), NH<sub>3</sub> (green), and H<sub>2</sub> (red). Sample was heated from 200-1300°C at a rate of 2°C/min in 100% N<sub>2</sub> and cooled down back to 200°C in 100% Ar. No significant reaction was measurable, in agreement with the Ellingham diagram (Figure S92).

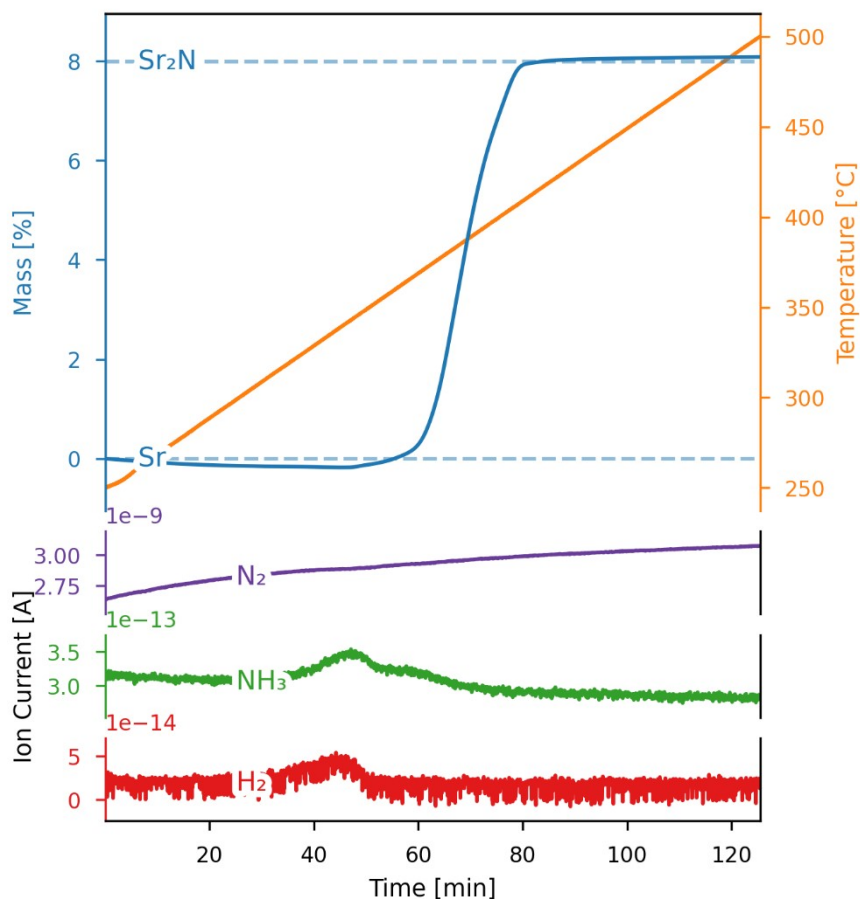

Figure S149: Variations of mass and temperature (recorded by the TGA) and ion current (recorded by the mass spectrometer) as a function of time for the Sr (granules)-nitridation under 100% N<sub>2</sub>. Blue dashed lines: theoretical mass changes for no conversion (0%) and full conversion to Sr<sub>2</sub>N (7.99%). The ion current signals correspond to N<sub>2</sub> (purple), NH<sub>3</sub> (green), and H<sub>2</sub> (red). Sample was heated from 200-500°C at a rate of 2°C/min in 100% N<sub>2</sub>. Sr reacted to Sr<sub>2</sub>N, in agreement with the Ellingham diagram (Figure S106).

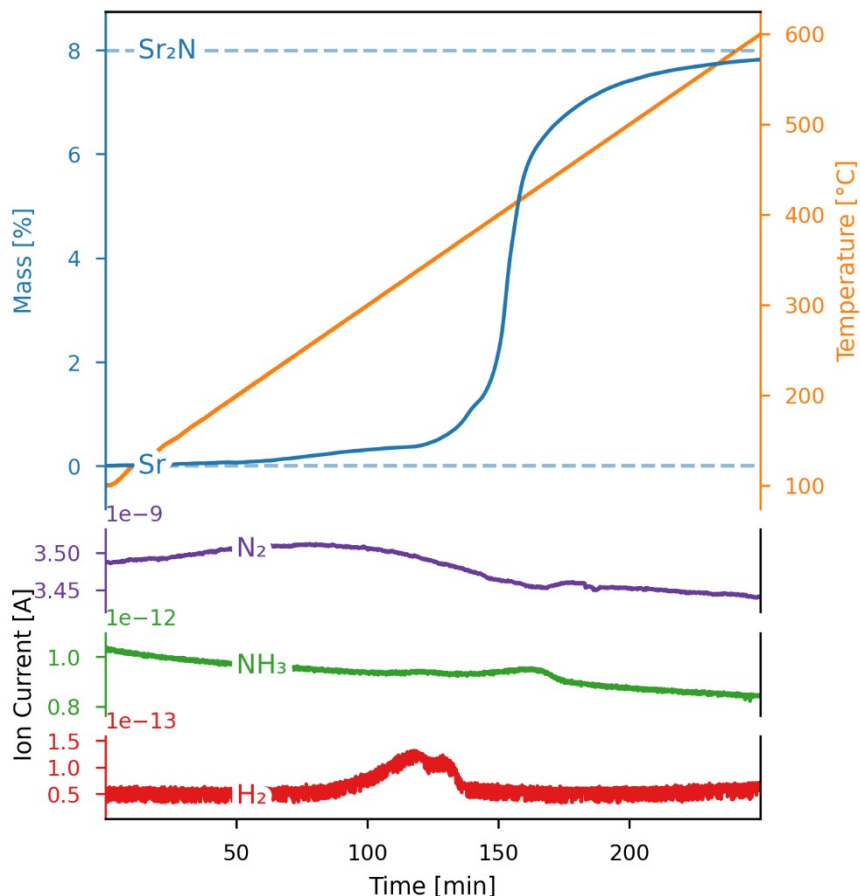

Figure S150: Variations of mass and temperature (recorded by the TGA) and ion current (recorded by the mass spectrometer) as a function of time for the Sr (random pieces)-nitridation under 100% N<sub>2</sub>. Blue dashed lines: theoretical mass changes for no conversion (0%) and full conversion to Sr<sub>2</sub>N (7.99%). The ion current signals correspond to N<sub>2</sub> (purple), NH<sub>3</sub> (green), and H<sub>2</sub> (red). Sample was heated from 100-600°C at a rate of 2°C/min in 100% N<sub>2</sub>. Sr reacted to Sr<sub>2</sub>N, in agreement with the Ellingham diagram (Figure S106). This TGA run is also shown in Figure 6.

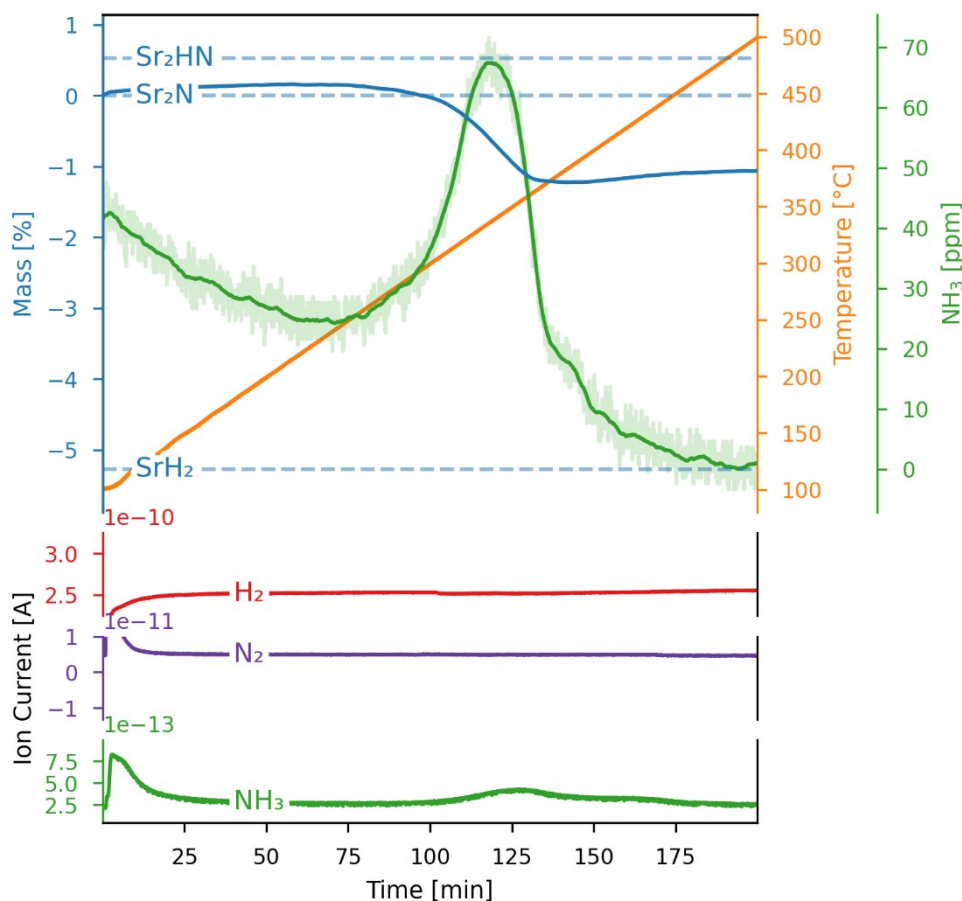

Figure S151: Variations of mass and temperature (recorded by the TGA), ion current (recorded by the mass spectrometer), and NH<sub>3</sub> concentration (recorded by the NH<sub>3</sub> analyzer) as a function of time for the Sr-nitridation under 5% H<sub>2</sub> in Ar. Blue dashed lines: theoretical mass changes for no

conversion (0%), full conversion to SrH<sub>2</sub> (-5.27%), and full conversion to Sr<sub>2</sub>HN (0.53%). The ion current signals correspond to N<sub>2</sub> (purple), NH<sub>3</sub> (green), and H<sub>2</sub> (red). Sample was heated from 100-500°C at a rate of 2°C/min in 5% H<sub>2</sub> in Ar. Sr reacted to a mixture of Sr<sub>2</sub>HN and SrH<sub>2</sub> in agreement with the Ellingham diagrams (Figure S114 and Figure S115). The NH<sub>3</sub> peak reached its maximum at 339°C. This TGA run is also shown in Figure 7.

*The W-based system*

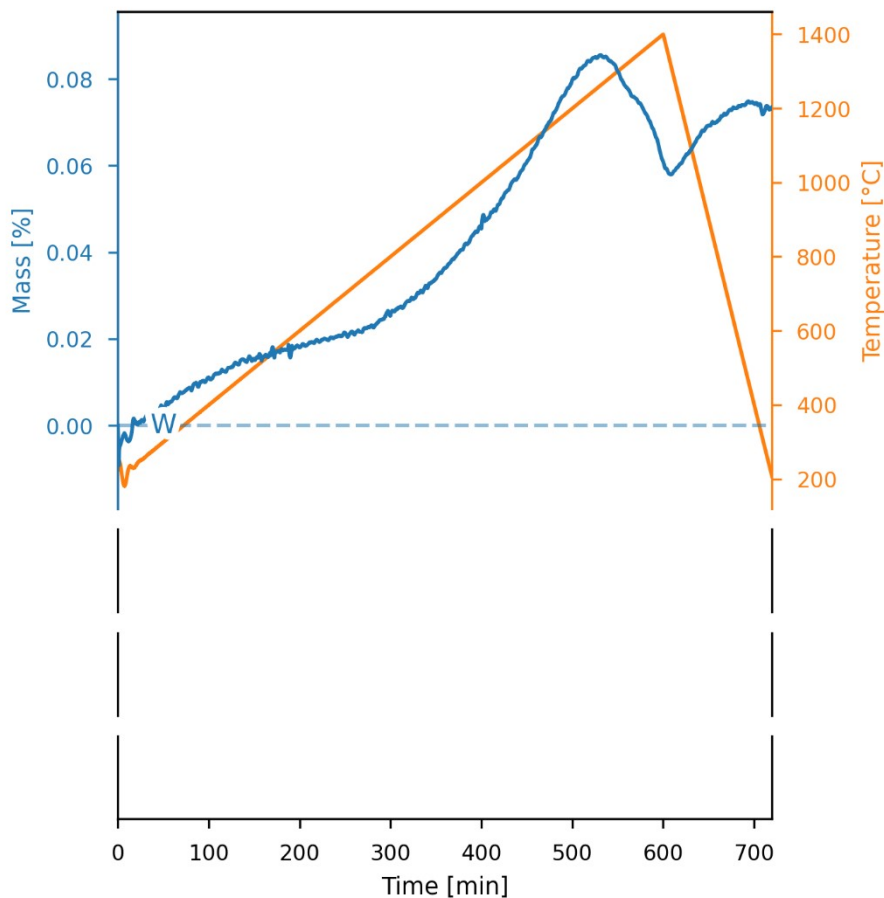

Figure S152: Variations of mass and temperature (recorded by the TGA) as a function of time for the W-nitridation under 100% N<sub>2</sub>. Blue dashed lines: theoretical mass changes for no conversion (0%). Sample was heated from 200-1400°C at a rate of 2°C/min in 100% N<sub>2</sub> and cooled down back to 200°C in 100% Ar. No significant reaction was measurable. According to the Ellingham diagram (Figure S120), the formation of W<sub>2</sub>N should be favourable in this temperature range.

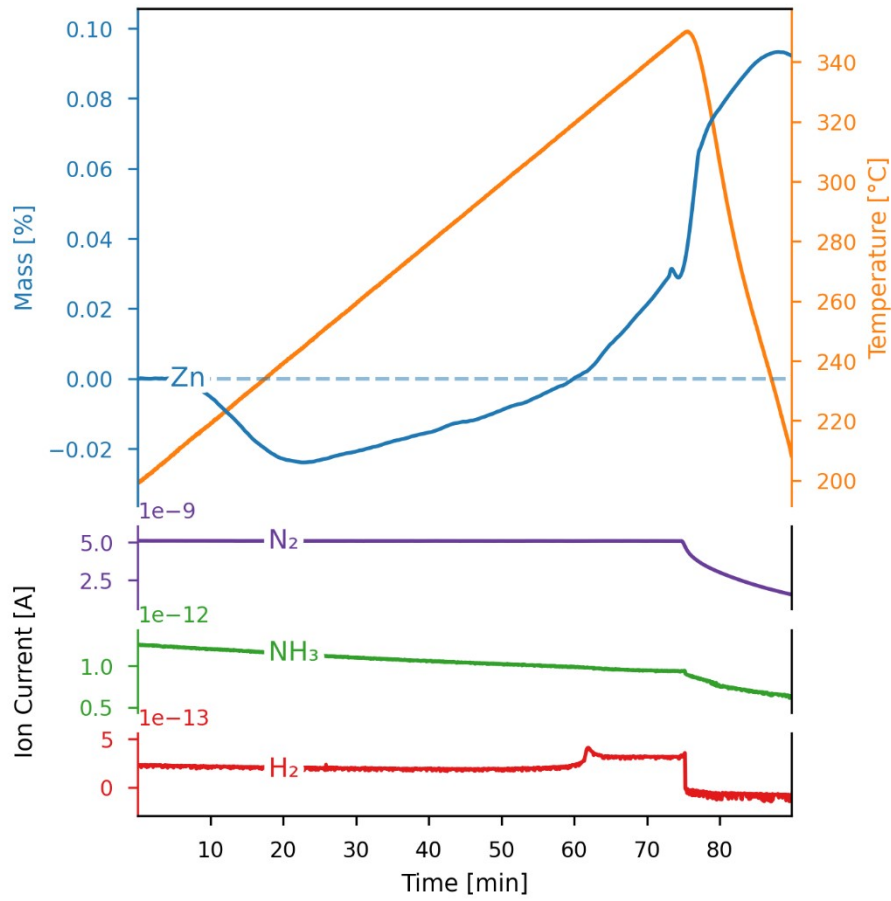

Figure S153: Variations of mass and temperature (recorded by the TGA) and ion current (recorded by the mass spectrometer) as a function of time for the Zn-nitridation under 100% N<sub>2</sub>. Blue dashed lines: theoretical mass changes for no conversion (0%). The ion current signals correspond to N<sub>2</sub> (purple), NH<sub>3</sub> (green), and H<sub>2</sub> (red). Sample was heated from 200-350°C at a rate of 2°C/min in 100% N<sub>2</sub> and cooled down back to 200°C in 100% Ar. No significant reaction was measurable, in agreement with the Ellingham diagram (Figure S128).

### 2.1 Converting ppm to mg/s for mass balance

The NH<sub>3</sub> concentration  $c_{NH_3, ppm}$  in ppm was recorded by the ABB Advance Optima AO2020 analyzer. The gas flow properties, temperature  $T$  in K, pressure  $P$  in Pa, and volumetric flow  $V$  in ml/min, were recorded by the Mesa Labs DryCal Defender 530+ Low Flow flow meter.

By definition, the concentration  $c_{NH_3, ppm}$  is defined as the moles of NH<sub>3</sub>  $n_{NH_3}$  over 1'000'000 moles in the total gas flow  $n_{gas}$ , i.e.

$$1 \text{ ppm of } NH_3 = \frac{1 \text{ mol of } NH_3}{1\,000\,000 \text{ moles of gas}}$$

The mass of NH<sub>3</sub>  $m_{NH_3}$  in g is calculated as

$$m_{NH_3} = n_{NH_3} \cdot M_{NH_3}$$

where  $M_{NH_3}$  is the molar mass of NH<sub>3</sub> in g/mol. The volume  $V$  in m<sup>3</sup> that 1'000'000 moles of gas occupy is calculated according to the ideal gas law:

$$V = \frac{1\,000\,000 \text{ mol} \cdot R \cdot T}{P}$$

where  $R$  is the universal gas constant in J/mol/K.

The mass flow of NH<sub>3</sub>  $\dot{m}_{NH_3}$  in mg/s is then given as:

$$\dot{m}_{NH_3} = \frac{m_{NH_3} \cdot 1000 \frac{mg}{g}}{V \cdot 1\,000\,000 \frac{ml}{m^3}} \cdot \frac{V}{60 \frac{s}{min}}$$

### 2.2 Solid Characterization by XRD

Figure S154 shows the XRD pattern of Kapton tape. Patterns were obtained by a Bruker AXS D2 Phaser diffractometer operated at 30 kV and 10 mA (Cu K $\alpha$ ) at  $2\theta = 5-105^\circ$ . The scanning step size and duration were 0.012° and 0.5 s, respectively. The background and K $\alpha_2$  were stripped using Bruker's DIFFRAC.EVA V3.1.

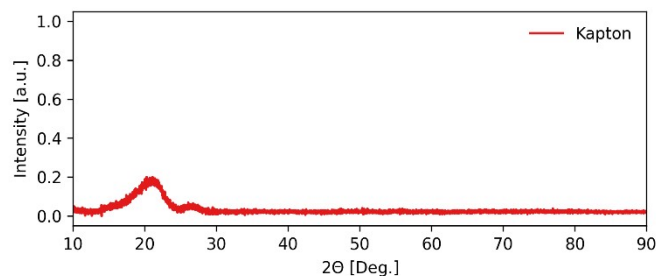

Figure S154: XRD patterns of Kapton tape. Peak intensities have been scaled to match with intensities observed in runs with a sample.

Figure S155 shows the XRD patterns of the Sr random pieces (Sigma-Aldrich, 99%, flakes in mm-range size). The sample was enclosed between two layers of Kapton tape. Patterns were obtained by a Bruker AXS D8 Advance diffractometer operated at 40 kV and 30 mA (Cu  $K\alpha$ ) at  $2\theta = 10\text{--}100^\circ$ . The scanning step size and duration were  $0.01^\circ$  and 0.5 s, respectively. The background and  $K\alpha_2$  were stripped using Bruker's DIFFRAC.EVA V7.0.

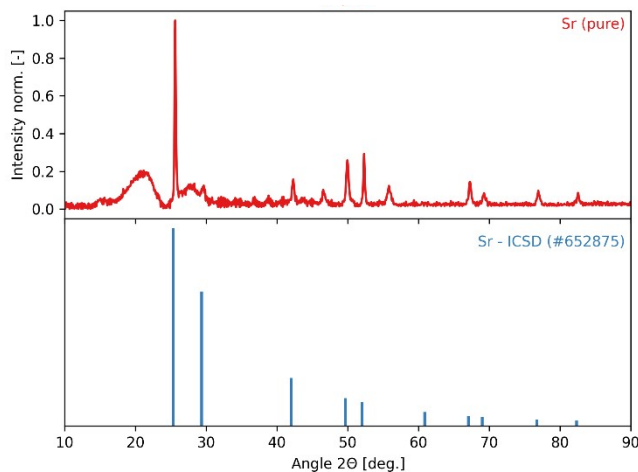

Figure S155: XRD patterns of the pure Sr. Peak intensities have been normalized.

### 3. References

- 1 A. Jain, S. P. Ong, G. Hautier, W. Chen, W. D. Richards, S. Dacek, S. Cholia, D. Gunter, D. Skinner, G. Ceder and K. A. Persson, *APL Mater.*, DOI:10.1063/1.4812323.
- 2 S. P. Ong, W. D. Richards, A. Jain, G. Hautier, M. Kocher, S. Cholia, D. Gunter, V. L. Chevrier, K. A. Persson and G. Ceder, *Comput. Mater. Sci.*, 2013, **68**, 314–319.
- 3 J. Vieten, B. Bulfin, P. Huck, M. Horton, D. Guban, L. Zhu, Y. Lu, K. A. Persson, M. Roeb and C. Sattler, *Energy Environ. Sci.*, 2019, **12**, 1369–1384.
- 4 N. W. Ashcroft and N. D. Mermin, *Solid State Physics [Festkörperphysik]*, Oldenbourg Wissenschaftsverlag, München, 2001.
